# Supplementary material for: Circulation of Babesia Species and Their Exposure to Humans through Ixodes ricinus
Source: Pathogens. 2021 Mar 24;10(4):386. doi: 10.3390/pathogens10040386 (PMC8063829; doi:10.3390/pathogens10040386)
Supplement: Supplementary file 1 [file pathogens-10-00386-s001.xlsx]

## Sheet: 18S RNA
Key	Country	Vertebrate	Year	Babesia spp.	Sequence quality	DNA Sequence
D144BE	Belgium	Meles meles	2015	Babesia sp. badger type B		AAATAACAATACAGGGCTTATAGTCTTGTAATTGGAATGATGGGGATATAAATCCTTCCCAGAGTATCAATTGGAGGGCAAGTCTGGTGCCAGCAGCCGCGGTAATTCCAGCTCCAATAGCGTATATTAAAGTTGTTGCAGTTAAGAAGCTCGTAGTTGAATTTCTGCCTTATCATTAATTTCGCTTATTAACGTAAATTTTATTGATTTGGCATCCTCTAATATTATATATATTTTATATATATTTTATTAGTATTTACTTTGAGAAAACTAGAGTGTTTCAAACAGGCTTATGCCTTGAATACTATAGCATGGAATAATGAAGTAGGACTTTGGTTCTATTTTGTTGGTTATTGAACCATAGTAATGGTTAATAGGAGCAGTTGGGGGCATTCGTATT
D299BE	Belgium	Meles meles	2015	Babesia sp. badger type B		CAGAGTATCAATTGGAGGGCAAGTCTGGTGCCAGCAGCCGCGGTAATTCCAGCTCCAATAGCGTATATTAAAGTTGTTGCAGTTAAGAAGCTCGTAGTTGAATTTCTGCCTTATCATTAATTTCGCTTATTAACGTAAATTTTATTGATTTGGCATCCTCTAATATTATATATATTTTATATATATTTTATTAGTATTTACTTTGAGAAAACTAGAGTGTTTCAAACAGGCTTATGCCTTGAATACTATAGCATGGAATAATGAAGTAGGACTTTGGTTCTATTTTGTTGGTTATTGAACCATAGTAATGGTTAATAGGAGCAGTTGGGGGCATTCGTATT
D112BE	Belgium	Meles meles	2015	Babesia sp. badger type B		AAATAACAATACAGGGCTTATAGTMTTGTAATTGGAATGATGGGGATATAAATCCTTCCCAGAGTATCAATTGGAGGGCAAGTSTGGTGCCAGCAGCCGCGGTAATTCCAGCTCCAATAGCGTATATTAAAGTTGTKGCAGTTAAGAAGCTSGTAGTTGAATTTCTGCCTTATCATTAATTTSGYTTATTAACGTAAATTTTATTGATTTGGCATCCTCTAATATTATATATATTTTATATATATTTTATTAGTATTTACTTTGAGAAAACTAGAGTGTTTCAAACAGGCTTATGCCTTGAATACTATAGCATGGAATAATGAAGTAGGACTTTGG
D132BE	Belgium	Meles meles	2015	Babesia sp. badger type B		AAATAACAATACAGGGMTTATAGTGKKGTAATTGGAATGATGGGGATATAAATCCTTCCCAGAGTRTCAATTGGAGGGCAGGTGKGGTGSCRGCAGGCGCGGTAATTCCAGCTCCAATAGCGTATATTAAAGTTGTTGCAGTTAAGAAGCTCGTAGTTGAATTTCTGCCTTATCATTAATTTCGCTTATTAACGTAAATTTTATTGATTTGGCATCCTCTAATATTATATATATTTTATATATATTTTATTAGTATTTACTTTGAGAAAACTAGAGTGTTTCAAACAGGCTTATGCCTTGAATACTATAGCATGGAATAATGAAGTAGGACTTTGGTTCTATTTTGTTGGTTATTGAACCATAGTAATGGTTAATAGGAGCAGTTGGGGGCATTCGTATT
Fox1505	Netherlands	Vulpes vulpes	2017	Babesia vulpes	no ambiguous nucleotides	AAATAACAATACAGGGCTTATAGTCTTGTAATTGGAATGATGGGAATCTAAACCCTTCCCAGAGTATCAATTGGAGGGCAAGTCTGGTGCCAGCAGCCGCGGTAATTCCAGCTCCAATAGCGTATATTAAAGTTGTTGCAGTTAAGAAGCTCGTAGTTGAATTTCTGCCTTATCATTAATTTCGCTTCCGAACGTAATTTTATTGATTTGGCATCTTCTGGATTATATATTATTTTTAATATATTTTTCCAGTATTTTACTTTGAGAAAACTAGAGTGTTTCAAACAGGCTTTTGCCTTGAATACTACAGCATGGAATAATGAAGTAGGACTATTGGTTCTATTTTGTTGGTTATCGAACCATAGTAATGGTTAATAGGAGCAGTTGGGGGCATTCGTA…
Fox1508	Netherlands	Vulpes vulpes	2017	Babesia vulpes	no ambiguous nucleotides	GGAATCTAAACCCTTCCCAGAGTATCAATTGGAGGGCAAGTCTGGTGCCAGCAGCCGCGGTAATTCCAGCTCCAATAGCGTATATTAAAGTTGTTGCAGTTAAGAAGCTCGTAGTTGAATTTCTGCCTTATCATTAATTTCGCTTCCGAACGTAATTTTATTGATTTGGCATCTTCTGGATTATATATTATTTTTAATATATTTTTCCAGTATTTTACTTTGAGAAAACTAGAGTGTTTCAAACAGGCTTTTGCCTTGAATACTACAGCATGGAATAATGAAGTAGGACTATTGGTTCTATTTTGTTGGTTATCGAACCATAGTAATGGTTAATAGGAGCAGTTGGGGGCATTCGTATT
Fox1509	Netherlands	Vulpes vulpes	2017	Babesia vulpes	no ambiguous nucleotides	GAATCTAAACCCTTCCCAGAGTATCAATTGGAGGGCAAGTCTGGTGCCAGCAGCCGCGGTAATTCCAGCTCCAATAGCGTATATTAAAGTTGTTGCAGTTAAGAAGCTCGTAGTTGAATTTCTGCCTTATCATTAATTTCGCTTCCGAACGTAATTTTATTGATTTGGCATCTTCTGGATTATATATTATTTTTAATATATTTTTCCAGTATTTTACTTTGAGAAAACTAGAGTGTTTCAAACAGGCTTTTGCCTTGAATACTACAGCATGGAATAATGAAGTAGGACTATTGGTTCTATTTTGTTGGTTATCGAACCATAGTAATGGTTAATAGGAGCAGTTGGGGGCATTCGTATT
Fox1536	Netherlands	Vulpes vulpes	2017	Babesia vulpes	no ambiguous nucleotides	GGAATCTAAACCCTTCCCAGAGTATCAATTGGAGGGCAAGTCTGGTGCCAGCAGCCGCGGTAATTCCAGCTCCAATAGCGTATATTAAAGTTGTTGCAGTTAAGAAGCTCGTAGTTGAATTTCTGCCTTATCATTAATTTCGCTTCCGAACGTAATTTTATTGATTTGGCATCTTCTGGATTATATATTATTTTTAATATATTTTTCCAGTATTTTACTTTGAGAAAACTAGAGTGTTTCAAACAGGCTTTTGCCTTGAATACTACAGCATGGAATAATGAAGTAGGACTATTGGTTCTATTTTGTTGGTTATCGAACCATAGTAATGGTTAATAGGAGCAGTTGGGGGCATTCGTATT
Fox1539	Netherlands	Vulpes vulpes	2017	Babesia vulpes	no ambiguous nucleotides	AAATAACAATACAGGGCTTATAGTCTTGTAATTGGAATGATGGGAATCTAAACCCTTCCCAGAGTATCAATTGGAGGGCAAGTCTGGTGCCAGCAGCCGCGGTAATTCCAGCTCCAATAGCGTATATTAAAGTTGTTGCAGTTAAGAAGCTCGTAGTTGAATTTCTGCCTTATCATTAATTTCGCTTCCGAACGTAATTTTATTGATTTGGCATCTTCTGGATTATATATTATTTTTAATATATTTTTCCAGTATTTTACTTTGAGAAAACTAGAGTGTTTCAAACAGGCTTTTGCCTTGAATACTACAGCATGGAATAATGAAGTAGGACTATTGGTTCTATTTTGTTGGTTATCGAACCATAGTAATGGTTAATAGGAGCAGTTGGGGGCATTCGTA…
Fox1571	Netherlands	Vulpes vulpes	2017	Babesia vulpes	no ambiguous nucleotides	AAATAACAATACAGGGCTTATAGTCTTGTAATTGGAATGATGGGAATCTAAACCCTTCCCAGAGTATCAATTGGAGGGCAAGTCTGGTGCCAGCAGCCGCGGTAATTCCAGCTCCAATAGCGTATATTAAAGTTGTTGCAGTTAAGAAGCTCGTAGTTGAATTTCTGCCTTATCATTAATTTCGCTTCCGAACGTAATTTTATTGATTTGGCATCTTCTGGATTATATATTATTTTTAATATATTTTTCCAGTATTTTACTTTGAGAAAACTAGAGTGTTTCAAACAGGCTTTTGCCTTGAATACTACAGCATGGAATAATGAAGTAGGACTATTGGTTCTATTTTGTTGGTTATCGAACCATAGTAATGGTTAATAGGAGCAGTTGGGGGCATTCGTA…
Fox1572	Netherlands	Vulpes vulpes	2017	Babesia vulpes	no ambiguous nucleotides	AAATAACAATACAGGGCTTATAGTCTTGTAATTGGAATGATGGGAATCTAAACCCTTCCCAGAGTATCAATTGGAGGGCAAGTCTGGTGCCAGCAGCCGCGGTAATTCCAGCTCCAATAGCGTATATTAAAGTTGTTGCAGTTAAGAAGCTCGTAGTTGAATTTCTGCCTTATCATTAATTTCGCTTCCGAACGTAATTTTATTGATTTGGCATCTTCTGGATTATATATTATTTTTAATATATTTTTCCAGTATTTTACTTTGAGAAAACTAGAGTGTTTCAAACAGGCTTTTGCCTTGAATACTACAGCATGGAATAATGAAGTAGGACTATTGGTTCTATTTTGTTGGTTATCGAACCATAGTAATGGTTAATAGGAGCAGTTGGGGGCATTCGTA…
Fox1573	Netherlands	Vulpes vulpes	2017	Babesia vulpes	no ambiguous nucleotides	AAATAACAATACAGGGCTTATAGTCTTGTAATTGGAATGATGGGAATCTAAACCCTTCCCAGAGTATCAATTGGAGGGCAAGTCTGGTGCCAGCAGCCGCGGTAATTCCAGCTCCAATAGCGTATATTAAAGTTGTTGCAGTTAAGAAGCTCGTAGTTGAATTTCTGCCTTATCATTAATTTCGCTTCCGAACGTAATTTTATTGATTTGGCATCTTCTGGATTATATATTATTTTTAATATATTTTTCCAGTATTTTACTTTGAGAAAACTAGAGTGTTTCAAACAGGCTTTTGCCTTGAATACTACAGCATGGAATAATGAAGTAGGACTATTGGTTCTATTTTGTTGGTTATCGAACCATAGTAATGGTTAATAGGAGCAGTTGGGGGCATTCGTA…
Fox1577	Netherlands	Vulpes vulpes	2016	Babesia vulpes	no ambiguous nucleotides	AAATAACAATACAGGGCTTATAGTCTTGTAATTGGAATGATGGGAATCTAAACCCTTCCCAGAGTATCAATTGGAGGGCAAGTCTGGTGCCAGCAGCCGCGGTAATTCCAGCTCCAATAGCGTATATTAAAGTTGTTGCAGTTAAGAAGCTCGTAGTTGAATTTCTGCCTTATCATTAATTTCGCTTCCGAACGTAATTTTATTGATTTGGCATCTTCTGGATTATATATTATTTTTAATATATTTTTCCAGTATTTTACTTTGAGAAAACTAGAGTGTTTCAAACAGGCTTTTGCCTTGAATACTACAGCATGGAATAATGAAGTAGGACTATTGGTTCTATTTTGTTGGTTATCGAACCATAGTAATGGTTAATAGGAGCAGTTGGGGGCATTCGTA…
WB19	Netherlands	Nyctereutes procyonoides	2014	Babesia vulpes	no ambiguous nucleotides	AAATAACAATACAGGGCTTATAGTCTTGTAATTGGAATGATGGGAATCTAAACCCTTCCCAGAGTATCAATTGGAGGGCAAGTCTGGTGCCAGCAGCCGCGGTAATTCCAGCTCCAATAGCGTATATTAAAGTTGTTGCAGTTAAGAAGCTCGTAGTTGAATTTCTGCCTTATCATTAATTTCGCTTCCGAACGTAATTTTATTGATTTGGCATCTTCTGGATTATATATTATTTTTAATATATTTTTCCAGTATTTTACTTTGAGAAAACTAGAGTGTTTCAAACAGGCTTTTGCCTTGAATACTACAGCATGGAATAATGAAGTAGGACTATTGGTTCTATTTTGTTGGTTATCGAACCATAGTAATGGTTAATAGGAGCAGTTGGGGGCATTCGTA…
Fox1535	Netherlands	Vulpes vulpes	2017	Babesia vulpes	no ambiguous nucleotides	AAATAACAATACAGGGCTTATAGTCTTGTAATTGGAATGATGGGAATCTAAACCCTTCCCAGAGTATCAATTGGAGGGCAAGTCTGGTGCCAGCAGCCGCGGTAATTCCAGCTCCAATAGCGTATATTAAAGTTGTTGCAGTTAAGAAGCTCGTAGTTGAATTTCTGCCTTATCATTAATTTCGCTTCCGAACGTAATTTTATTGATTTGGCATCTTCTGGATTATATATTATTTTTAATATATTTTTCCAGTATTTTACTTTGAGAAAACTAGAGTGTTTCAAACAGGCTTTTGCCTTGAATACTACAGCATGGAATAATGAAGTAGGACTATTGGTTCTATTTTGTTGGTTATCGAACCATAGTAATGGTTAATAGGAGCAGTTGGGGGCATTCGTA…
Fox1537	Netherlands	Vulpes vulpes	2017	Babesia vulpes	no ambiguous nucleotides	AAATAACAATACAGGGCTTATAGTCTTGTAATTGGAATGATGGGAATCTAAACCCTTCCCAGAGTATCAATTGGAGGGCAAGTCTGGTGCCAGCAGCCGCGGTAATTCCAGCTCCAATAGCGTATATTAAAGTTGTTGCAGTTAAGAAGCTCGTAGTTGAATTTCTGCCTTATCATTAATTTCGCTTCCGAACGTAATTTTATTGATTTGGCATCTTCTGGATTATATATTATTTTTAATATATTTTTCCAGTATTTTACTTTGAGAAAACTAGAGTGTTTCAAACAGGCTTTTGCCTTGAATACTACAGCATGGAATAATGAAGTAGGACTATTGGTTCTATTTTGTTGGTTATCGAACCATAGTAATGGTTAATAGGAGCAGTTGGGGGCATTCGTA…
Fox1543	Netherlands	Vulpes vulpes	2017	Babesia vulpes	no ambiguous nucleotides	AAATAACAATACAGGGCTTATAGTCTTGTAATTGGAATGATGGGAATCTAAACCCTTCCCAGAGTATCAATTGGAGGGCAAGTCTGGTGCCAGCAGCCGCGGTAATTCCAGCTCCAATAGCGTATATTAAAGTTGTTGCAGTTAAGAAGCTCGTAGTTGAATTTCTGCCTTATCATTAATTTCGCTTCCGAACGTAATTTTATTGATTTGGCATCTTCTGGATTATATATTATTTTTAATATATTTTTCCAGTATTTTACTTTGAGAAAACTAGAGTGTTTCAAACAGGCTTTTGCCTTGAATACTACAGCATGGAATAATGAAGTAGGACTATTGGTTCTATTTTGTTGGTTATCGAACCATAGTAATGGTTAATAGGAGCAGTTGGGGGCATTCGTA…
Fox1547	Netherlands	Vulpes vulpes	2017	Babesia vulpes	no ambiguous nucleotides	AAATAACAATACAGGGCTTATAGTCTTGTAATTGGAATGATGGGAATCTAAACCCTTCCCAGAGTATCAATTGGAGGGCAAGTCTGGTGCCAGCAGCCGCGGTAATTCCAGCTCCAATAGCGTATATTAAAGTTGTTGCAGTTAAGAAGCTCGTAGTTGAATTTCTGCCTTATCATTAATTTCGCTTCCGAACGTAATTTTATTGATTTGGCATCTTCTGGATTATATATTATTTTTAATATATTTTTCCAGTATTTTACTTTGAGAAAACTAGAGTGTTTCAAACAGGCTTTTGCCTTGAATACTACAGCATGGAATAATGAAGTAGGACTATTGGTTCTATTTTGTTGGTTATCGAACCATAGTAATGGTTAATAGGAGCAGTTGGGGGCATTCGTA…
Fox1550	Netherlands	Vulpes vulpes	2017	Babesia vulpes	no ambiguous nucleotides	AAATAACAATACAGGGCTTATAGTCTTGTAATTGGAATGATGGGAATCTAAACCCTTCCCAGAGTATCAATTGGAGGGCAAGTCTGGTGCCAGCAGCCGCGGTAATTCCAGCTCCAATAGCGTATATTAAAGTTGTTGCAGTTAAGAAGCTCGTAGTTGAATTTCTGCCTTATCATTAATTTCGCTTCCGAACGTAATTTTATTGATTTGGCATCTTCTGGATTATATATTATTTTTAATATATTTTTCCAGTATTTTACTTTGAGAAAACTAGAGTGTTTCAAACAGGCTTTTGCCTTGAATACTACAGCATGGAATAATGAAGTAGGACTATTGGTTCTATTTTGTTGGTTATCGAACCATAGTAATGGTTAATAGGAGCAGTTGGGGGCATTCGTA…
Fox1568	Netherlands	Vulpes vulpes	2017	Babesia vulpes	no ambiguous nucleotides	AAATAACAATACAGGGCTTATAGTCTTGTAATTGGAATGATGGGAATCTAAACCCTTCCCAGAGTATCAATTGGAGGGCAAGTCTGGTGCCAGCAGCCGCGGTAATTCCAGCTCCAATAGCGTATATTAAAGTTGTTGCAGTTAAGAAGCTCGTAGTTGAATTTCTGCCTTATCATTAATTTCGCTTCCGAACGTAATTTTATTGATTTGGCATCTTCTGGATTATATATTATTTTTAATATATTTTTCCAGTATTTTACTTTGAGAAAACTAGAGTGTTTCAAACAGGCTTTTGCCTTGAATACTACAGCATGGAATAATGAAGTAGGACTATTGGTTCTATTTTGTTGGTTATCGAACCATAGTAATGGTTAATAGGAGCAGTTGGGGGCATTCGTA…
Fox1409	Netherlands	Vulpes vulpes	2016	Babesia vulpes	no ambiguous nucleotides	AAATAACAATACAGGGCTTATAGTCTTGTAATTGGAATGATGGGAATCTAAACCCTTCCCAGAGTATCAATTGGAGGGCAAGTCTGGTGCCAGCAGCCGCGGTAATTCCAGCTCCAATAGCGTATATTAAAGTTGTTGCAGTTAAGAAGCTCGTAGTTGAATTTCTGCCTTATCATTAATTTCGCTTCCGAACGTAATTTTATTGATTTGGCATCTTCTGGATTATATATTATTTTTAATATATTTTTCCAGTATTTTACTTTGAGAAAACTAGAGTGTTTCAAACAGGCTTTTGCCTTGAATACTACAGCATGGAATAATGAAGTAGGACTATTGGTTCTATTTTGTTGGTTATCGAACCATAGTAATGGTTAATAGGAGCAGTTGGGGGCATTCGTA…
Fox1414	Netherlands	Vulpes vulpes	2016	Babesia vulpes	no ambiguous nucleotides	AAATAACAATACAGGGCTTATAGTCTTGTAATTGGAATGATGGGAATCTAAACCCTTCCCAGAGTATCAATTGGAGGGCAAGTCTGGTGCCAGCAGCCGCGGTAATTCCAGCTCCAATAGCGTATATTAAAGTTGTTGCAGTTAAGAAGCTCGTAGTTGAATTTCTGCCTTATCATTAATTTCGCTTCCGAACGTAATTTTATTGATTTGGCATCTTCTGGATTATATATTATTTTTAATATATTTTTCCAGTATTTTACTTTGAGAAAACTAGAGTGTTTCAAACAGGCTTTTGCCTTGAATACTACAGCATGGAATAATGAAGTAGGACTATTGGTTCTATTTTGTTGGTTATCGAACCATAGTAATGGTTAATAGGAGCAGTTGGGGGCATTCGTA…
Fox1416	Netherlands	Vulpes vulpes	2016	Babesia vulpes	no ambiguous nucleotides	AAATAACAATACAGGGCTTATAGTCTTGTAATTGGAATGATGGGAATCTAAACCCTTCCCAGAGTATCAATTGGAGGGCAAGTCTGGTGCCAGCAGCCGCGGTAATTCCAGCTCCAATAGCGTATATTAAAGTTGTTGCAGTTAAGAAGCTCGTAGTTGAATTTCTGCCTTATCATTAATTTCGCTTCCGAACGTAATTTTATTGATTTGGCATCTTCTGGATTATATATTATTTTTAATATATTTTTCCAGTATTTTACTTTGAGAAAACTAGAGTGTTTCAAACAGGCTTTTGCCTTGAATACTACAGCATGGAATAATGAAGTAGGACTATTGGTTCTATTTTGTTGGTTATCGAACCATAGTAATGGTTAATAGGAGCAGTTGGGGGCATTCGTA…
Fox1420	Netherlands	Vulpes vulpes	2016	Babesia vulpes	no ambiguous nucleotides	AAATAACAATACAGGGCTTATAGTCTTGTAATTGGAATGATGGGAATCTAAACCCTTCCCAGAGTATCAATTGGAGGGCAAGTCTGGTGCCAGCAGCCGCGGTAATTCCAGCTCCAATAGCGTATATTAAAGTTGTTGCAGTTAAGAAGCTCGTAGTTGAATTTCTGCCTTATCATTAATTTCGCTTCCGAACGTAATTTTATTGATTTGGCATCTTCTGGATTATATATTATTTTTAATATATTTTTCCAGTATTTTACTTTGAGAAAACTAGAGTGTTTCAAACAGGCTTTTGCCTTGAATACTACAGCATGGAATAATGAAGTAGGACTATTGGTTCTATTTTGTTGGTTATCGAACCATAGTAATGGTTAATAGGAGCAGTTGGGGGCATTCGTA…
Fox1428	Netherlands	Vulpes vulpes	2016	Babesia vulpes	no ambiguous nucleotides	AAATAACAATACAGGGCTTATAGTCTTGTAATTGGAATGATGGGAATCTAAACCCTTCCCAGAGTATCAATTGGAGGGCAAGTCTGGTGCCAGCAGCCGCGGTAATTCCAGCTCCAATAGCGTATATTAAAGTTGTTGCAGTTAAGAAGCTCGTAGTTGAATTTCTGCCTTATCATTAATTTCGCTTCCGAACGTAATTTTATTGATTTGGCATCTTCTGGATTATATATTATTTTTAATATATTTTTCCAGTATTTTACTTTGAGAAAACTAGAGTGTTTCAAACAGGCTTTTGCCTTGAATACTACAGCATGGAATAATGAAGTAGGACTATTGGTTCTATTTTGTTGGTTATCGAACCATAGTAATGGTTAATAGGAGCAGTTGGGGGCATTCGTA…
Fox1432	Netherlands	Vulpes vulpes	2016	Babesia vulpes	no ambiguous nucleotides	AAATAACAATACAGGGCTTATAGTCTTGTAATTGGAATGATGGGAATCTAAACCCTTCCCAGAGTATCAATTGGAGGGCAAGTCTGGTGCCAGCAGCCGCGGTAATTCCAGCTCCAATAGCGTATATTAAAGTTGTTGCAGTTAAGAAGCTCGTAGTTGAATTTCTGCCTTATCATTAATTTCGCTTCCGAACGTAATTTTATTGATTTGGCATCTTCTGGATTATATATTATTTTTAATATATTTTTCCAGTATTTTACTTTGAGAAAACTAGAGTGTTTCAAACAGGCTTTTGCCTTGAATACTACAGCATGGAATAATGAAGTAGGACTATTGGTTCTATTTTGTTGGTTATCGAACCATAGTAATGGTTAATAGGAGCAGTTGGGGGCATTCGTA…
Fox1435	Netherlands	Vulpes vulpes	2016	Babesia vulpes	no ambiguous nucleotides	AAATAACAATACAGGGCTTATAGTCTTGTAATTGGAATGATGGGAATCTAAACCCTTCCCAGAGTATCAATTGGAGGGCAAGTCTGGTGCCAGCAGCCGCGGTAATTCCAGCTCCAATAGCGTATATTAAAGTTGTTGCAGTTAAGAAGCTCGTAGTTGAATTTCTGCCTTATCATTAATTTCGCTTCCGAACGTAATTTTATTGATTTGGCATCTTCTGGATTATATATTATTTTTAATATATTTTTCCAGTATTTTACTTTGAGAAAACTAGAGTGTTTCAAACAGGCTTTTGCCTTGAATACTACAGCATGGAATAATGAAGTAGGACTATTGGTTCTATTTTGTTGGTTATCGAACCATAGTAATGGTTAATAGGAGCAGTTGGGGGCATTCGTA…
Fox1438	Netherlands	Vulpes vulpes	2016	Babesia vulpes	no ambiguous nucleotides	AAATAACAATACAGGGCTTATAGTCTTGTAATTGGAATGATGGGAATCTAAACCCTTCCCAGAGTATCAATTGGAGGGCAAGTCTGGTGCCAGCAGCCGCGGTAATTCCAGCTCCAATAGCGTATATTAAAGTTGTTGCAGTTAAGAAGCTCGTAGTTGAATTTCTGCCTTATCATTAATTTCGCTTCCGAACGTAATTTTATTGATTTGGCATCTTCTGGATTATATATTATTTTTAATATATTTTTCCAGTATTTTACTTTGAGAAAACTAGAGTGTTTCAAACAGGCTTTTGCCTTGAATACTACAGCATGGAATAATGAAGTAGGACTATTGGTTCTATTTTGTTGGTTATCGAACCATAGTAATGGTTAATAGGAGCAGTTGGGGGCATTCGTA…
Fox1445	Netherlands	Vulpes vulpes	2016	Babesia vulpes	no ambiguous nucleotides	AAATAACAATACAGGGCTTATAGTCTTGTAATTGGAATGATGGGAATCTAAACCCTTCCCAGAGTATCAATTGGAGGGCAAGTCTGGTGCCAGCAGCCGCGGTAATTCCAGCTCCAATAGCGTATATTAAAGTTGTTGCAGTTAAGAAGCTCGTAGTTGAATTTCTGCCTTATCATTAATTTCGCTTCCGAACGTAATTTTATTGATTTGGCATCTTCTGGATTATATATTATTTTTAATATATTTTTCCAGTATTTTACTTTGAGAAAACTAGAGTGTTTCAAACAGGCTTTTGCCTTGAATACTACAGCATGGAATAATGAAGTAGGACTATTGGTTCTATTTTGTTGGTTATCGAACCATAGTAATGGTTAATAGGAGCAGTTGGGGGCATTCGTA…
Fox1457	Netherlands	Vulpes vulpes	2016	Babesia vulpes	no ambiguous nucleotides	AAATAACAATACAGGGCTTATAGTCTTGTAATTGGAATGATGGGAATCTAAACCCTTCCCAGAGTATCAATTGGAGGGCAAGTCTGGTGCCAGCAGCCGCGGTAATTCCAGCTCCAATAGCGTATATTAAAGTTGTTGCAGTTAAGAAGCTCGTAGTTGAATTTCTGCCTTATCATTAATTTCGCTTCCGAACGTAATTTTATTGATTTGGCATCTTCTGGATTATATATTATTTTTAATATATTTTTCCAGTATTTTACTTTGAGAAAACTAGAGTGTTTCAAACAGGCTTTTGCCTTGAATACTACAGCATGGAATAATGAAGTAGGACTATTGGTTCTATTTTGTTGGTTATCGAACCATAGTAATGGTTAATAGGAGCAGTTGGGGGCATTCGTA…
Fox1463	Netherlands	Vulpes vulpes	2016	Babesia vulpes	no ambiguous nucleotides	AAATAACAATACAGGGCTTATAGTCTTGTAATTGGAATGATGGGAATCTAAACCCTTCCCAGAGTATCAATTGGAGGGCAAGTCTGGTGCCAGCAGCCGCGGTAATTCCAGCTCCAATAGCGTATATTAAAGTTGTTGCAGTTAAGAAGCTCGTAGTTGAATTTCTGCCTTATCATTAATTTCGCTTCCGAACGTAATTTTATTGATTTGGCATCTTCTGGATTATATATTATTTTTAATATATTTTTCCAGTATTTTACTTTGAGAAAACTAGAGTGTTTCAAACAGGCTTTTGCCTTGAATACTACAGCATGGAATAATGAAGTAGGACTATTGGTTCTATTTTGTTGGTTATCGAACCATAGTAATGGTTAATAGGAGCAGTTGGGGGCATTCGTA…
Fox1477	Netherlands	Vulpes vulpes	2016	Babesia vulpes	no ambiguous nucleotides	AAATAACAATACAGGGCTTATAGTCTTGTAATTGGAATGATGGGAATCTAAACCCTTCCCAGAGTATCAATTGGAGGGCAAGTCTGGTGCCAGCAGCCGCGGTAATTCCAGCTCCAATAGCGTATATTAAAGTTGTTGCAGTTAAGAAGCTCGTAGTTGAATTTCTGCCTTATCATTAATTTCGCTTCCGAACGTAATTTTATTGATTTGGCATCTTCTGGATTATATATTATTTTTAATATATTTTTCCAGTATTTTACTTTGAGAAAACTAGAGTGTTTCAAACAGGCTTTTGCCTTGAATACTACAGCATGGAATAATGAAGTAGGACTATTGGTTCTATTTTGTTGGTTATCGAACCATAGTAATGGTTAATAGGAGCAGTTGGGGGCATTCGTA…
Fox1481	Netherlands	Vulpes vulpes	2017	Babesia vulpes	no ambiguous nucleotides	AAATAACAATACAGGGCTTATAGTCTTGTAATTGGAATGATGGGAATCTAAACCCTTCCCAGAGTATCAATTGGAGGGCAAGTCTGGTGCCAGCAGCCGCGGTAATTCCAGCTCCAATAGCGTATATTAAAGTTGTTGCAGTTAAGAAGCTCGTAGTTGAATTTCTGCCTTATCATTAATTTCGCTTCCGAACGTAATTTTATTGATTTGGCATCTTCTGGATTATATATTATTTTTAATATATTTTTCCAGTATTTTACTTTGAGAAAACTAGAGTGTTTCAAACAGGCTTTTGCCTTGAATACTACAGCATGGAATAATGAAGTAGGACTATTGGTTCTATTTTGTTGGTTATCGAACCATAGTAATGGTTAATAGGAGCAGTTGGGGGCATTCGTA…
Fox1485	Netherlands	Vulpes vulpes	2017	Babesia vulpes	no ambiguous nucleotides	AAATAACAATACAGGGCTTATAGTCTTGTAATTGGAATGATGGGAATCTAAACCCTTCCCAGAGTATCAATTGGAGGGCAAGTCTGGTGCCAGCAGCCGCGGTAATTCCAGCTCCAATAGCGTATATTAAAGTTGTTGCAGTTAAGAAGCTCGTAGTTGAATTTCTGCCTTATCATTAATTTCGCTTCCGAACGTAATTTTATTGATTTGGCATCTTCTGGATTATATATTATTTTTAATATATTTTTCCAGTATTTTACTTTGAGAAAACTAGAGTGTTTCAAACAGGCTTTTGCCTTGAATACTACAGCATGGAATAATGAAGTAGGACTATTGGTTCTATTTTGTTGGTTATCGAACCATAGTAATGGTTAATAGGAGCAGTTGGGGGCATTCGTA…
Fox1510	Netherlands	Vulpes vulpes	2017	Babesia vulpes	no ambiguous nucleotides	AAATAACAATACAGGGCTTATAGTCTTGTAATTGGAATGATGGGAATCTAAACCCTTCCCAGAGTATCAATTGGAGGGCAAGTCTGGTGCCAGCAGCCGCGGTAATTCCAGCTCCAATAGCGTATATTAAAGTTGTTGCAGTTAAGAAGCTCGTAGTTGAATTTCTGCCTTATCATTAATTTCGCTTCCGAACGTAATTTTATTGATTTGGCATCTTCTGGATTATATATTATTTTTAATATATTTTTCCAGTATTTTACTTTGAGAAAACTAGAGTGTTTCAAACAGGCTTTTGCCTTGAATACTACAGCATGGAATAATGAAGTAGGACTATTGGTTCTATTTTGTTGGTTATCGAACCATAGTAATGGTTAATAGGAGCAGTTGGGGGCATTCGTA…
Fox1511	Netherlands	Vulpes vulpes	2017	Babesia vulpes	no ambiguous nucleotides	AAATAACAATACAGGGCTTATAGTCTTGTAATTGGAATGATGGGAATCTAAACCCTTCCCAGAGTATCAATTGGAGGGCAAGTCTGGTGCCAGCAGCCGCGGTAATTCCAGCTCCAATAGCGTATATTAAAGTTGTTGCAGTTAAGAAGCTCGTAGTTGAATTTCTGCCTTATCATTAATTTCGCTTCCGAACGTAATTTTATTGATTTGGCATCTTCTGGATTATATATTATTTTTAATATATTTTTCCAGTATTTTACTTTGAGAAAACTAGAGTGTTTCAAACAGGCTTTTGCCTTGAATACTACAGCATGGAATAATGAAGTAGGACTATTGGTTCTATTTTGTTGGTTATCGAACCATAGTAATGGTTAATAGGAGCAGTTGGGGGCATTCGTA…
Fox1514	Netherlands	Vulpes vulpes	2017	Babesia vulpes	no ambiguous nucleotides	AAATAACAATACAGGGCTTATAGTCTTGTAATTGGAATGATGGGAATCTAAACCCTTCCCAGAGTATCAATTGGAGGGCAAGTCTGGTGCCAGCAGCCGCGGTAATTCCAGCTCCAATAGCGTATATTAAAGTTGTTGCAGTTAAGAAGCTCGTAGTTGAATTTCTGCCTTATCATTAATTTCGCTTCCGAACGTAATTTTATTGATTTGGCATCTTCTGGATTATATATTATTTTTAATATATTTTTCCAGTATTTTACTTTGAGAAAACTAGAGTGTTTCAAACAGGCTTTTGCCTTGAATACTACAGCATGGAATAATGAAGTAGGACTATTGGTTCTATTTTGTTGGTTATCGAACCATAGTAATGGTTAATAGGAGCAGTTGGGGGCATTCGTA…
Fox1515	Netherlands	Vulpes vulpes	2017	Babesia vulpes	no ambiguous nucleotides	AAATAACAATACAGGGCTTATAGTCTTGTAATTGGAATGATGGGAATCTAAACCCTTCCCAGAGTATCAATTGGAGGGCAAGTCTGGTGCCAGCAGCCGCGGTAATTCCAGCTCCAATAGCGTATATTAAAGTTGTTGCAGTTAAGAAGCTCGTAGTTGAATTTCTGCCTTATCATTAATTTCGCTTCCGAACGTAATTTTATTGATTTGGCATCTTCTGGATTATATATTATTTTTAATATATTTTTCCAGTATTTTACTTTGAGAAAACTAGAGTGTTTCAAACAGGCTTTTGCCTTGAATACTACAGCATGGAATAATGAAGTAGGACTATTGGTTCTATTTTGTTGGTTATCGAACCATAGTAATGGTTAATAGGAGCAGTTGGGGGCATTCGTA…
Fox1516	Netherlands	Vulpes vulpes	2017	Babesia vulpes	no ambiguous nucleotides	AAATAACAATACAGGGCTTATAGTCTTGTAATTGGAATGATGGGAATCTAAACCCTTCCCAGAGTATCAATTGGAGGGCAAGTCTGGTGCCAGCAGCCGCGGTAATTCCAGCTCCAATAGCGTATATTAAAGTTGTTGCAGTTAAGAAGCTCGTAGTTGAATTTCTGCCTTATCATTAATTTCGCTTCCGAACGTAATTTTATTGATTTGGCATCTTCTGGATTATATATTATTTTTAATATATTTTTCCAGTATTTTACTTTGAGAAAACTAGAGTGTTTCAAACAGGCTTTTGCCTTGAATACTACAGCATGGAATAATGAAGTAGGACTATTGGTTCTATTTTGTTGGTTATCGAACCATAGTAATGGTTAATAGGAGCAGTTGGGGGCATTCGTA…
Fox1517	Netherlands	Vulpes vulpes	2017	Babesia vulpes	no ambiguous nucleotides	AAATAACAATACAGGGCTTATAGTCTTGTAATTGGAATGATGGGAATCTAAACCCTTCCCAGAGTATCAATTGGAGGGCAAGTCTGGTGCCAGCAGCCGCGGTAATTCCAGCTCCAATAGCGTATATTAAAGTTGTTGCAGTTAAGAAGCTCGTAGTTGAATTTCTGCCTTATCATTAATTTCGCTTCCGAACGTAATTTTATTGATTTGGCATCTTCTGGATTATATATTATTTTTAATATATTTTTCCAGTATTTTACTTTGAGAAAACTAGAGTGTTTCAAACAGGCTTTTGCCTTGAATACTACAGCATGGAATAATGAAGTAGGACTATTGGTTCTATTTTGTTGGTTATCGAACCATAGTAATGGTTAATAGGAGCAGTTGGGGGCATTCGTA…
Fox1518	Netherlands	Vulpes vulpes	2017	Babesia vulpes	no ambiguous nucleotides	AAATAACAATACAGGGCTTATAGTCTTGTAATTGGAATGATGGGAATCTAAACCCTTCCCAGAGTATCAATTGGAGGGCAAGTCTGGTGCCAGCAGCCGCGGTAATTCCAGCTCCAATAGCGTATATTAAAGTTGTTGCAGTTAAGAAGCTCGTAGTTGAATTTCTGCCTTATCATTAATTTCGCTTCCGAACGTAATTTTATTGATTTGGCATCTTCTGGATTATATATTATTTTTAATATATTTTTCCAGTATTTTACTTTGAGAAAACTAGAGTGTTTCAAACAGGCTTTTGCCTTGAATACTACAGCATGGAATAATGAAGTAGGACTATTGGTTCTATTTTGTTGGTTATCGAACCATAGTAATGGTTAATAGGAGCAGTTGGGGGCATTCGTA…
Fox1519	Netherlands	Vulpes vulpes	2017	Babesia vulpes	no ambiguous nucleotides	AAATAACAATACAGGGCTTATAGTCTTGTAATTGGAATGATGGGAATCTAAACCCTTCCCAGAGTATCAATTGGAGGGCAAGTCTGGTGCCAGCAGCCGCGGTAATTCCAGCTCCAATAGCGTATATTAAAGTTGTTGCAGTTAAGAAGCTCGTAGTTGAATTTCTGCCTTATCATTAATTTCGCTTCCGAACGTAATTTTATTGATTTGGCATCTTCTGGATTATATATTATTTTTAATATATTTTTCCAGTATTTTACTTTGAGAAAACTAGAGTGTTTCAAACAGGCTTTTGCCTTGAATACTACAGCATGGAATAATGAAGTAGGACTATTGGTTCTATTTTGTTGGTTATCGAACCATAGTAATGGTTAATAGGAGCAGTTGGGGGCATTCGTA…
Fox1522	Netherlands	Vulpes vulpes	2017	Babesia vulpes	no ambiguous nucleotides	AAATAACAATACAGGGCTTATAGTCTTGTAATTGGAATGATGGGAATCTAAACCCTTCCCAGAGTATCAATTGGAGGGCAAGTCTGGTGCCAGCAGCCGCGGTAATTCCAGCTCCAATAGCGTATATTAAAGTTGTTGCAGTTAAGAAGCTCGTAGTTGAATTTCTGCCTTATCATTAATTTCGCTTCCGAACGTAATTTTATTGATTTGGCATCTTCTGGATTATATATTATTTTTAATATATTTTTCCAGTATTTTACTTTGAGAAAACTAGAGTGTTTCAAACAGGCTTTTGCCTTGAATACTACAGCATGGAATAATGAAGTAGGACTATTGGTTCTATTTTGTTGGTTATCGAACCATAGTAATGGTTAATAGGAGCAGTTGGGGGCATTCGTA…
Fox1523	Netherlands	Vulpes vulpes	2017	Babesia vulpes	no ambiguous nucleotides	AAATAACAATACAGGGCTTATAGTCTTGTAATTGGAATGATGGGAATCTAAACCCTTCCCAGAGTATCAATTGGAGGGCAAGTCTGGTGCCAGCAGCCGCGGTAATTCCAGCTCCAATAGCGTATATTAAAGTTGTTGCAGTTAAGAAGCTCGTAGTTGAATTTCTGCCTTATCATTAATTTCGCTTCCGAACGTAATTTTATTGATTTGGCATCTTCTGGATTATATATTATTTTTAATATATTTTTCCAGTATTTTACTTTGAGAAAACTAGAGTGTTTCAAACAGGCTTTTGCCTTGAATACTACAGCATGGAATAATGAAGTAGGACTATTGGTTCTATTTTGTTGGTTATCGAACCATAGTAATGGTTAATAGGAGCAGTTGGGGGCATTCGTA…
Fox1524	Netherlands	Vulpes vulpes	2017	Babesia vulpes	no ambiguous nucleotides	AAATAACAATACAGGGCTTATAGTCTTGTAATTGGAATGATGGGAATCTAAACCCTTCCCAGAGTATCAATTGGAGGGCAAGTCTGGTGCCAGCAGCCGCGGTAATTCCAGCTCCAATAGCGTATATTAAAGTTGTTGCAGTTAAGAAGCTCGTAGTTGAATTTCTGCCTTATCATTAATTTCGCTTCCGAACGTAATTTTATTGATTTGGCATCTTCTGGATTATATATTATTTTTAATATATTTTTCCAGTATTTTACTTTGAGAAAACTAGAGTGTTTCAAACAGGCTTTTGCCTTGAATACTACAGCATGGAATAATGAAGTAGGACTATTGGTTCTATTTTGTTGGTTATCGAACCATAGTAATGGTTAATAGGAGCAGTTGGGGGCATTCGTA…
Fox1525	Netherlands	Vulpes vulpes	2017	Babesia vulpes	no ambiguous nucleotides	AAATAACAATACAGGGCTTATAGTCTTGTAATTGGAATGATGGGAATCTAAACCCTTCCCAGAGTATCAATTGGAGGGCAAGTCTGGTGCCAGCAGCCGCGGTAATTCCAGCTCCAATAGCGTATATTAAAGTTGTTGCAGTTAAGAAGCTCGTAGTTGAATTTCTGCCTTATCATTAATTTCGCTTCCGAACGTAATTTTATTGATTTGGCATCTTCTGGATTATATATTATTTTTAATATATTTTTCCAGTATTTTACTTTGAGAAAACTAGAGTGTTTCAAACAGGCTTTTGCCTTGAATACTACAGCATGGAATAATGAAGTAGGACTATTGGTTCTATTTTGTTGGTTATCGAACCATAGTAATGGTTAAT
Fox1526	Netherlands	Vulpes vulpes	2017	Babesia vulpes	no ambiguous nucleotides	AAATAACAATACAGGGCTTATAGTCTTGTAATTGGAATGATGGGAATCTAAACCCTTCCCAGAGTATCAATTGGAGGGCAAGTCTGGTGCCAGCAGCCGCGGTAATTCCAGCTCCAATAGCGTATATTAAAGTTGTTGCAGTTAAGAAGCTCGTAGTTGAATTTCTGCCTTATCATTAATTTCGCTTCCGAACGTAATTTTATTGATTTGGCATCTTCTGGATTATATATTATTTTTAATATATTTTTCCAGTATTTTACTTTGAGAAAACTAGAGTGTTTCAAACAGGCTTTTGCCTTGAATACTACAGCATGGAATAATGAAGTAGGACTATTGGTTCTATTTTGTTGGTTATCGAACCATAGTAATGGTTAATAGGAGCAGTTGGGGGCATTCGTA…
Fox1542	Netherlands	Vulpes vulpes	2017	Babesia vulpes	no ambiguous nucleotides	AAATAACAATACAGGGCTTATAGTCTTGTAATTGGAATGATGGGAATCTAAACCCTTCCCAGAGTATCAATTGGAGGGCAAGTCTGGTGCCAGCAGCCGCGGTAATTCCAGCTCCAATAGCGTATATTAAAGTTGTTGCAGTTAAGAAGCTCGTAGTTGAATTTCTGCCTTATCATTAATTTCGCTTCCGAACGTAATTTTATTGATTTGGCATCTTCTGGATTATATATTATTTTTAATATATTTTTCCAGTATTTTACTTTGAGAAAACTAGAGTGTTTCAAACAGGCTTTTGCCTTGAATACTACAGCATGGAATAATGAAGTAGGACTATTGGTTCTATTTTGTTGGTTATCGAACCATAGTAATGGTTAATAGGAGCAGTTGGGGGCATTCGTA…
Fox1544	Netherlands	Vulpes vulpes	2017	Babesia vulpes	no ambiguous nucleotides	AAATAACAATACAGGGCTTATAGTCTTGTAATTGGAATGATGGGAATCTAAACCCTTCCCAGAGTATCAATTGGAGGGCAAGTCTGGTGCCAGCAGCCGCGGTAATTCCAGCTCCAATAGCGTATATTAAAGTTGTTGCAGTTAAGAAGCTCGTAGTTGAATTTCTGCCTTATCATTAATTTCGCTTCCGAACGTAATTTTATTGATTTGGCATCTTCTGGATTATATATTATTTTTAATATATTTTTCCAGTATTTTACTTTGAGAAAACTAGAGTGTTTCAAACAGGCTTTTGCCTTGAATACTACAGCATGGAATAATGAAGTAGGACTATTGGTTCTATTTTGTTGGTTATCGAACCATAGTAATGGTTAATAGGAGCAGTTGGGGGCATTCGTA…
Fox1551	Netherlands	Vulpes vulpes	2017	Babesia vulpes	no ambiguous nucleotides	AAATAACAATACAGGGCTTATAGTCTTGTAATTGGAATGATGGGAATCTAAACCCTTCCCAGAGTATCAATTGGAGGGCAAGTCTGGTGCCAGCAGCCGCGGTAATTCCAGCTCCAATAGCGTATATTAAAGTTGTTGCAGTTAAGAAGCTCGTAGTTGAATTTCTGCCTTATCATTAATTTCGCTTCCGAACGTAATTTTATTGATTTGGCATCTTCTGGATTATATATTATTTTTAATATATTTTTCCAGTATTTTACTTTGAGAAAACTAGAGTGTTTCAAACAGGCTTTTGCCTTGAATACTACAGCATGGAATAATGAAGTAGGACTATTGGTTCTATTTTGTTGGTTATCGAACCATAGTAATGGTTAATAGGAGCAGTTGGGGGCATTCGTA…
Fox1552	Netherlands	Vulpes vulpes	2017	Babesia vulpes	no ambiguous nucleotides	AAATAACAATACAGGGCTTATAGTCTTGTAATTGGAATGATGGGAATCTAAACCCTTCCCAGAGTATCAATTGGAGGGCAAGTCTGGTGCCAGCAGCCGCGGTAATTCCAGCTCCAATAGCGTATATTAAAGTTGTTGCAGTTAAGAAGCTCGTAGTTGAATTTCTGCCTTATCATTAATTTCGCTTCCGAACGTAATTTTATTGATTTGGCATCTTCTGGATTATATATTATTTTTAATATATTTTTCCAGTATTTTACTTTGAGAAAACTAGAGTGTTTCAAACAGGCTTTTGCCTTGAATACTACAGCATGGAATAATGAAGTAGGACTATTGGTTCTATTTTGTTGGTTATCGAACCATAGTAATGGTTAATAGGAGCAGTTGGGGGCATTCGTA…
Fox1558	Netherlands	Vulpes vulpes	2017	Babesia vulpes	no ambiguous nucleotides	AAATAACAATACAGGGCTTATAGTCTTGTAATTGGAATGATGGGAATCTAAACCCTTCCCAGAGTATCAATTGGAGGGCAAGTCTGGTGCCAGCAGCCGCGGTAATTCCAGCTCCAATAGCGTATATTAAAGTTGTTGCAGTTAAGAAGCTCGTAGTTGAATTTCTGCCTTATCATTAATTTCGCTTCCGAACGTAATTTTATTGATTTGGCATCTTCTGGATTATATATTATTTTTAATATATTTTTCCAGTATTTTACTTTGAGAAAACTAGAGTGTTTCAAACAGGCTTTTGCCTTGAATACTACAGCATGGAATAATGAAGTAGGACTATTGGTTCTATTTTGTTGGTTATCGAACCATAGTAATGGTTAATAGGAGCAGTTGGGGGCATTCGTA…
Fox1563	Netherlands	Vulpes vulpes	2017	Babesia vulpes	no ambiguous nucleotides	AAATAACAATACAGGGCTTATAGTCTTGTAATTGGAATGATGGGAATCTAAACCCTTCCCAGAGTATCAATTGGAGGGCAAGTCTGGTGCCAGCAGCCGCGGTAATTCCAGCTCCAATAGCGTATATTAAAGTTGTTGCAGTTAAGAAGCTCGTAGTTGAATTTCTGCCTTATCATTAATTTCGCTTCCGAACGTAATTTTATTGATTTGGCATCTTCTGGATTATATATTATTTTTAATATATTTTTCCAGTATTTTACTTTGAGAAAACTAGAGTGTTTCAAACAGGCTTTTGCCTTGAATACTACAGCATGGAATAATGAAGTAGGACTATTGGTTCTATTTTGTTGGTTATCGAACCATAGTAATGGTTAATAGGAGCAGTTGGGGGCATTCGTA…
Fox1576	Netherlands	Vulpes vulpes	2016	Babesia vulpes	no ambiguous nucleotides	AAATAACAATACAGGGCTTATAGTCTTGTAATTGGAATGATGGGAATCTAAACCCTTCCCAGAGTATCAATTGGAGGGCAAGTCTGGTGCCAGCAGCCGCGGTAATTCCAGCTCCAATAGCGTATATTAAAGTTGTTGCAGTTAAGAAGCTCGTAGTTGAATTTCTGCCTTATCATTAATTTCGCTTCCGAACGTAATTTTATTGATTTGGCATCTTCTGGATTATATATTATTTTTAATATATTTTTCCAGTATTTTACTTTGAGAAAACTAGAGTGTTTCAAACAGGCTTTTGCCTTGAATACTACAGCATGGAATAATGAAGTAGGACTATTGGTTCTATTTTGTTGGTTATCGAACCATAGTAATGGTTAATAGGAGCAGTTGGGGGCATTCGTA…
Fox1470	Netherlands	Vulpes vulpes	2016	Babesia vulpes	no ambiguous nucleotides	AAATAACAATACAGGGCTTATAGTCTTGTAATTGGAATGATGGGAATCTAAACCCTTCCCAGAGTATCAATTGGAGGGCAAGTCTGGTGCCAGCAGCCGCGGTAATTCCAGCTCCAATAGCGTATATTAAAGTTGTTGCAGTTAAGAAGCTCGTAGTTGAATTTCTGCCTTATCATTAATTTCGCTTCCGAACGTAATTTTATTGATTTGGCATCTTCTGGATTATATATTATTTTTAATATATTTTTCCAGTATTTTACTTTGAGAAAACTAGAGTGTTTCAAACAGGCTTTTGCCTTGAATACTACAGCATGGAATAATGAAGTAGGACTATTGGTTCTATTTTGTTGGTTATCGAACCATAGTAATGGTTAATAGGAGCAGTTGGGGGCATTCGTA…
Fox1471	Netherlands	Vulpes vulpes	2016	Babesia vulpes	no ambiguous nucleotides	AAATAACAATACAGGGCTTATAGTCTTGTAATTGGAATGATGGGAATCTAAACCCTTCCCAGAGTATCAATTGGAGGGCAAGTCTGGTGCCAGCAGCCGCGGTAATTCCAGCTCCAATAGCGTATATTAAAGTTGTTGCAGTTAAGAAGCTCGTAGTTGAATTTCTGCCTTATCATTAATTTCGCTTCCGAACGTAATTTTATTGATTTGGCATCTTCTGGATTATATATTATTTTTAATATATTTTTCCAGTATTTTACTTTGAGAAAACTAGAGTGTTTCAAACAGGCTTTTGCCTTGAATACTACAGCATGGAATAATGAAGTAGGACTATTGGTTCTATTTTGTTGGTTATCGAACCATAGTAATGGTTAATAGGAGCAGTTGGGGGCATTCGTA…
Fox1491	Netherlands	Vulpes vulpes	2017	Babesia vulpes	no ambiguous nucleotides	AAATAACAATACAGGGCTTATAGTCTTGTAATTGGAATGATGGGAATCTAAACCCTTCCCAGAGTATCAATTGGAGGGCAAGTCTGGTGCCAGCAGCCGCGGTAATTCCAGCTCCAATAGCGTATATTAAAGTTGTTGCAGTTAAGAAGCTCGTAGTTGAATTTCTGCCTTATCATTAATTTCGCTTCCGAACGTAATTTTATTGATTTGGCATCTTCTGGATTATATATTATTTTTAATATATTTTTCCAGTATTTTACTTTGAGAAAACTAGAGTGTTTCAAACAGGCTTTTGCCTTGAATACTACAGCATGGAATAATGAAGTAGGACTATTGGTTCTATTTTGTTGGTTATCGAACCATAGTAATGGTTAATAGGAGCAGTTGGGGGCATTCGTA…
Fox1493	Netherlands	Vulpes vulpes	2017	Babesia vulpes	no ambiguous nucleotides	GTCTTGTAATTGGAATGATGGGAATCTAAACCCTTCCCAGAGTATCAATTGGAGGGCAAGTCTGGTGCCAGCAGCCGCGGTAATTCCAGCTCCAATAGCGTATATTAAAGTTGTTGCAGTTAAGAAGCTCGTAGTTGAATTTCTGCCTTATCATTAATTTCGCTTCCGAACGTAATTTTATTGATTTGGCATCTTCTGGATTATATATTATTTTTAATATATTTTTCCAGTATTTTACTTTGAGAAAACTAGAGTGTTTCAAACAGGCTTTTGCCTTGAATACTACAGCATGGAATAATGAAGTAGGACTATTGGTTCTATTTTGTTGGTTATCGAACCATAGTAATGGTTAATAGGAGCAGTTGGGGGCATTCGTATT
Fox1494	Netherlands	Vulpes vulpes	2017	Babesia vulpes	no ambiguous nucleotides	GGAATCTAAACCCTTCCCAGAGTATCAATTGGAGGGCAAGTCTGGTGCCAGCAGCCGCGGTAATTCCAGCTCCAATAGCGTATATTAAAGTTGTTGCAGTTAAGAAGCTCGTAGTTGAATTTCTGCCTTATCATTAATTTCGCTTCCGAACGTAATTTTATTGATTTGGCATCTTCTGGATTATATATTATTTTTAATATATTTTTCCAGTATTTTACTTTGAGAAAACTAGAGTGTTTCAAACAGGCTTTTGCCTTGAATACTACAGCATGGAATAATGAAGTAGGACTATTGGTTCTATTTTGTTGGTTATCGAACCATAGTAATGGTTAATAGGAGCAGTTGGGGGCATTCGTATT
Fox1495	Netherlands	Vulpes vulpes	2017	Babesia vulpes	no ambiguous nucleotides	AAATAACAATACAGGGCTTATAGTCTTGTAATTGGAATGATGGGAATCTAAACCCTTCCCAGAGTATCAATTGGAGGGCAAGTCTGGTGCCAGCAGCCGCGGTAATTCCAGCTCCAATAGCGTATATTAAAGTTGTTGCAGTTAAGAAGCTCGTAGTTGAATTTCTGCCTTATCATTAATTTCGCTTCCGAACGTAATTTTATTGATTTGGCATCTTCTGGATTATATATTATTTTTAATATATTTTTCCAGTATTTTACTTTGAGAAAACTAGAGTGTTTCAAACAGGCTTTTGCCTTGAATACTACAGCATGGAATAATGAAGTAGGACTATTGGTTCTATTTTGTTGGTTATCGAACCATAGTAATGGTTAATAGGAGCAGTTGGGGGCATTCGTA…
Fox1501	Netherlands	Vulpes vulpes	2017	Babesia vulpes	no ambiguous nucleotides	AAATAACAATACAGGGCTTATAGTCTTGTAATTGGAATGATGGGAATCTAAACCCTTCCCAGAGTATCAATTGGAGGGCAAGTCTGGTGCCAGCAGCCGCGGTAATTCCAGCTCCAATAGCGTATATTAAAGTTGTTGCAGTTAAGAAGCTCGTAGTTGAATTTCTGCCTTATCATTAATTTCGCTTCCGAACGTAATTTTATTGATTTGGCATCTTCTGGATTATATATTATTTTTAATATATTTTTCCAGTATTTTACTTTGAGAAAACTAGAGTGTTTCAAACAGGCTTTTGCCTTGAATACTACAGCATGGAATAATGAAGTAGGACTATTGGTTCTATTTTGTTGGTTATCGAACCATAGTAATGGTTAATAGGAGCAGTTGGGGGCATTCGTA…
Fox1502	Netherlands	Vulpes vulpes	2017	Babesia vulpes	no ambiguous nucleotides	AAATAACAATACAGGGCTTATAGTCTTGTAATTGGAATGATGGGAATCTAAACCCTTCCCAGAGTATCAATTGGAGGGCAAGTCTGGTGCCAGCAGCCGCGGTAATTCCAGCTCCAATAGCGTATATTAAAGTTGTTGCAGTTAAGAAGCTCGTAGTTGAATTTCTGCCTTATCATTAATTTCGCTTCCGAACGTAATTTTATTGATTTGGCATCTTCTGGATTATATATTATTTTTAATATATTTTTCCAGTATTTTACTTTGAGAAAACTAGAGTGTTTCAAACAGGCTTTTGCCTTGAATACTACAGCATGGAATAATGAAGTAGGACTATTGGTTCTATTTTGTTGGTTATCGAACCATAGTAATGGTTAATAGGAGCAGTTGGGGGCATTCGTA…
WB30	Netherlands	Nyctereutes procyonoides	2017	Babesia vulpes	no ambiguous nucleotides	AAATAACAATACAGGGCTTATAGTCTTGTAATTGGAATGATGGGAATCTAAACCCTTCCCAGAGTATCAATTGGAGGGCAAGTCTGGTGCCAGCAGCCGCGGTAATTCCAGCTCCAATAGCGTATATTAAAGTTGTTGCAGTTAAGAAGCTCGTAGTTGAATTTCTGCCTTATCATTAATTTCGCTTCCGAACGTAATTTTATTGATTTGGCATCTTCTGGATTATATATTATTTTTAATATATTTTTCCAGTATTTTACTTTGAGAAAACTAGAGTGTTTCAAACAGGCTTTTGCCTTGAATACTACAGCATGGAATAATGAAGTAGGACTATTGGTTCTATTTTGTTGGTTATCGAACCATAGTAATGGTTAATAGGAGCAGTTGGGGGCATTCGTA…
Fox1507	Netherlands	Vulpes vulpes	2017	Babesia vulpes	ambiguous nucleotides	TAAACCCTTCCCAGAGTATCAATTGGAGGGCAAGTCTGGTGCCAGCAGCCGCGGTAATTCCAGCTCCAATAGCGTATATTAAAGTTGTTGCAGTTAAGAAGCTCGTAGTTGAATTTCTGCCTTATCATTAATTTCGCTTCCGAACGTAATTTTATTGATTTGGCATCTTCTGGATTATATATTATTTTTAATATATTTTTCCAGTATTTTACTTTGAGAAAACTAGAGTGTTTCAAACAGGCTTTTGCCTTGAATACTACAGCATGGAATAATGAAGTAGGACTATTGGTTCTATTTTGTTGGTTATCGAACCATAWTAATGGTTAATAGGAGCAGTTGGGGGCATTCGTATT
D103BE	Belgium	Meles meles	2015	Babesia sp. badger type A		AAATAACAATACAGGGCTTATAGTCTTGTAATTGGAATGATGGGAATCTAAACCCTTCCCAGAGTATCAATTGGAGGGCAAGTCTGGTGCCAGCAGCCGCGGTAATTCCAGCTCCAATAGCGTATATTAAAGTTGTTGCAGTTAAGAAGCTCGTAGTTGAATTTCTGCCTTATCATTAATTTCGCTTCCGAACGTAATTTTATTGATTTGGCATCTTCTGGATTTATATTTTTATTAATATTTTTCCAGTATTTACTTTGAGAAAACTAGAGTGTTTCAAACAGGCTATTGCCTTGAATACTACAGCATGGAATAATGAAGTAGGACTTTGGTTCTATTTTGTTGGTTATCGAACCATAGTAATGGTTAATAGGAGCAGTTGGGGGCATTCGTATT
D105BE	Belgium	Meles meles	2015	Babesia sp. badger type A		AAATAACAATACAGGGCTTATAGTCTTGTAATTGGAATGATGGGAATCTAAACCCTTCCCAGAGTATCAATTGGAGGGCAAGTCTGGTGCCAGCAGCCGCGGTAATTCCAGCTCCAATAGCGTATATTAAAGTTGTTGCAGTTAAGAAGCTCGTAGTTGAATTTCTGCCTTATCATTAATTTCGCTTCCGAACGTAATTTTATTGATTTGGCATCTTCTGGATTTATATTTTTATTAATATTTTTCCAGTATTTACTTTGAGAAAACTAGAGTGTTTCAAACAGGCTATTGCCTTGAATACTACAGCATGGAATAATGAAGTAGGACTTTGGTTCTATTTTGTTGGTTATCGAACCATAGTAATGGTTAATAGGAGCAGTTGGGGGCATTCGTATT
D110BE	Belgium	Meles meles	2015	Babesia sp. badger type A		AAATAACAATACAGGGCTTATAGTCTTGTAATTGGAATGATGGGAATCTAAACCCTTCCCAGAGTATCAATTGGAGGGCAAGTCTGGTGCCAGCAGCCGCGGTAATTCCAGCTCCAATAGCGTATATTAAAGTTGTTGCAGTTAAGAAGCTCGTAGTTGAATTTCTGCCTTATCATTAATTTCGCTTCCGAACGTAATTTTATTGATTTGGCATCTTCTGGATTTATATTTTTATTAATATTTTTCCAGTATTTACTTTGAGAAAACTAGAGTGTTTCAAACAGGCTATTGCCTTGAATACTACAGCATGGAATAATGAAGTAGGACTTTGGTTCTATTTTGTTGGTTATCGAACCATAGTAATGGTTAATAGGAGCAGTTGGGGGCATTCGTATT
D118BE	Belgium	Meles meles	2015	Babesia sp. badger type A		AAATAACAATACAGGGCTTATAGTCTTGTAATTGGAATGATGGGAATCTAAACCCTTCCCAGAGTATCAATTGGAGGGCAAGTCTGGTGCCAGCAGCCGCGGTAATTCCAGCTCCAATAGCGTATATTAAAGTTGTTGCAGTTAAGAAGCTCGTAGTTGAATTTCTGCCTTATCATTAATTTCGCTTCCGAACGTAATTTTATTGATTTGGCATCTTCTGGATTTATATTTTTATTAATATTTTTCCAGTATTTACTTTGAGAAAACTAGAGTGTTTCAAACAGGCTATTGCCTTGAATACTACAGCATGGAATAATGAAGTAGGACTTTGGTTCTATTTTGTTGGTTATCGAACCATAGTAATGGTTAATAGGAGCAGTTGGGGGCATTCGTATT
D119BE	Belgium	Meles meles	2015	Babesia sp. badger type A		AAATAACAATACAGGGCTTATAGTCTTGTAATTGGAATGATGGGAATCTAAACCCTTCCCAGAGTATCAATTGGAGGGCAAGTCTGGTGCCAGCAGCCGCGGTAATTCCAGCTCCAATAGCGTATATTAAAGTTGTTGCAGTTAAGAAGCTCGTAGTTGAATTTCTGCCTTATCATTAATTTCGCTTCCGAACGTAATTTTATTGATTTGGCATCTTCTGGATTTATATTTTTATTAATATTTTTCCAGTATTTACTTTGAGAAAACTAGAGTGTTTCAAACAGGCTATTGCCTTGAATACTACAGCATGGAATAATGAAGTAGGACTTTGGTTCTATTTTGTTGGTTATCGAACCATAGTAATGGTTAATAGGAGCAGTTGGGGGCATTCGTATT
D121BE	Belgium	Meles meles	2015	Babesia sp. badger type A		AAATAACAATACAGGGCTTATAGTCTTGTAATTGGAATGATGGGAATCTAAACCCTTCCCAGAGTATCAATTGGAGGGCAAGTCTGGTGCCAGCAGCCGCGGTAATTCCAGCTCCAATAGCGTATATTAAAGTTGTTGCAGTTAAGAAGCTCGTAGTTGAATTTCTGCCTTATCATTAATTTCGCTTCCGAACGTAATTTTATTGATTTGGCATCTTCTGGATTTATATTTTTATTAATATTTTTCCAGTATTTACTTTGAGAAAACTAGAGTGTTTCAAACAGGCTATTGCCTTGAATACTACAGCATGGAATAATGAAGTAGGACTTTGGTTCTATTTTGTTGGTTATCGAACCATAGTAATGGTTAATAGGAGCAGTTGGGGGCATTCGTATT
D123BE	Belgium	Meles meles	2015	Babesia sp. badger type A		AAATAACAATACAGGGCTTATAGTCTTGTAATTGGAATGATGGGAATCTAAACCCTTCCCAGAGTATCAATTGGAGGGCAAGTCTGGTGCCAGCAGCCGCGGTAATTCCAGCTCCAATAGCGTATATTAAAGTTGTTGCAGTTAAGAAGCTCGTAGTTGAATTTCTGCCTTATCATTAATTTCGCTTCCGAACGTAATTTTATTGATTTGGCATCTTCTGGATTTATATTTTTATTAATATTTTTCCAGTATTTACTTTGAGAAAACTAGAGTGTTTCAAACAGGCTATTGCCTTGAATACTACAGCATGGAATAATGAAGTAGGACTTTGGTTCTATTTTGTTGGTTATCGAACCATAGTAATGGTTAATAGGAGCAGTTGGGGGCATTCGTATT
D133BE	Belgium	Meles meles	2015	Babesia sp. badger type A		AAATAACAATACAGGGCTTATAGTCTTGTAATTGGAATGATGGGAATCTAAACCCTTCCCAGAGTATCAATTGGAGGGCAAGTCTGGTGCCAGCAGCCGCGGTAATTCCAGCTCCAATAGCGTATATTAAAGTTGTTGCAGTTAAGAAGCTCGTAGTTGAATTTCTGCCTTATCATTAATTTCGCTTCCGAACGTAATTTTATTGATTTGGCATCTTCTGGATTTATATTTTTATTAATATTTTTCCAGTATTTACTTTGAGAAAACTAGAGTGTTTCAAACAGGCTATTGCCTTGAATACTACAGCATGGAATAATGAAGTAGGACTTTGGTTCTATTTTGTTGGTTATCGAACCATAGTAATGGTTAATAGGAGCAGTTGGGGGCATTCGTATT
D136BE	Belgium	Meles meles	2015	Babesia sp. badger type A		AAATAACAATACAGGGCTTATAGTCTTGTAATTGGAATGATGGGAATCTAAACCCTTCCCAGAGTATCAATTGGAGGGCAAGTCTGGTGCCAGCAGCCGCGGTAATTCCAGCTCCAATAGCGTATATTAAAGTTGTTGCAGTTAAGAAGCTCGTAGTTGAATTTCTGCCTTATCATTAATTTCGCTTCCGAACGTAATTTTATTGATTTGGCATCTTCTGGATTTATATTTTTATTAATATTTTTCCAGTATTTACTTTGAGAAAACTAGAGTGTTTCAAACAGGCTATTGCCTTGAATACTACAGCATGGAATAATGAAGTAGGACTTTGGTTCTATTTTGTTGGTTATCGAACCATAGTAATGGTTAATAGGAGCAGTTGGGGGCATTCGTATT
D137BE	Belgium	Meles meles	2015	Babesia sp. badger type A		AAATAACAATACAGGGCTTATAGTCTTGTAATTGGAATGATGGGAATCTAAACCCTTCCCAGAGTATCAATTGGAGGGCAAGTCTGGTGCCAGCAGCCGCGGTAATTCCAGCTCCAATAGCGTATATTAAAGTTGTTGCAGTTAAGAAGCTCGTAGTTGAATTTCTGCCTTATCATTAATTTCGCTTCCGAACGTAATTTTATTGATTTGGCATCTTCTGGATTTATATTTTTATTAATATTTTTCCAGTATTTACTTTGAGAAAACTAGAGTGTTTCAAACAGGCTATTGCCTTGAATACTACAGCATGGAATAATGAAGTAGGACTTTGGTTCTATTTTGTTGGTTATCGAACCATAGTAATGGTTAATAGGAGCAGTTGGGGGCATTCGTATT
D145BE	Belgium	Meles meles	2015	Babesia sp. badger type A		AAATAACAATACAGGGCTTATAGTCTTGTAATTGGAATGATGGGAATCTAAACCCTTCCCAGAGTATCAATTGGAGGGCAAGTCTGGTGCCAGCAGCCGCGGTAATTCCAGCTCCAATAGCGTATATTAAAGTTGTTGCAGTTAAGAAGCTCGTAGTTGAATTTCTGCCTTATCATTAATTTCGCTTCCGAACGTAATTTTATTGATTTGGCATCTTCTGGATTTATATTTTTATTAATATTTTTCCAGTATTTACTTTGAGAAAACTAGAGTGTTTCAAACAGGCTATTGCCTTGAATACTACAGCATGGAATAATGAAGTAGGACTTTGGTTCTATTTTGTTGGTTATCGAACCATAGTAATGGTTAATAGGAGCAGTTGGGGGCATTCGTATT
D147BE	Belgium	Meles meles	2015	Babesia sp. badger type A		AAATAACAATACAGGGCTTATAGTCTTGTAATTGGAATGATGGGAATCTAAACCCTTCCCAGAGTATCAATTGGAGGGCAAGTCTGGTGCCAGCAGCCGCGGTAATTCCAGCTCCAATAGCGTATATTAAAGTTGTTGCAGTTAAGAAGCTCGTAGTTGAATTTCTGCCTTATCATTAATTTCGCTTCCGAACGTAATTTTATTGATTTGGCATCTTCTGGATTTATATTTTTATTAATATTTTTCCAGTATTTACTTTGAGAAAACTAGAGTGTTTCAAACAGGCTATTGCCTTGAATACTACAGCATGGAATAATGAAGTAGGACTTTGGTTCTATTTTGTTGGTTATCGAACCATAGTAATGGTTAATAGGAGCAGTTGGGGGCATTCGTATT
D149BE	Belgium	Meles meles	2015	Babesia sp. badger type A		AAATAACAATACAGGGCTTATAGTCTTGTAATTGGAATGATGGGAATCTAAACCCTTCCCAGAGTATCAATTGGAGGGCAAGTCTGGTGCCAGCAGCCGCGGTAATTCCAGCTCCAATAGCGTATATTAAAGTTGTTGCAGTTAAGAAGCTCGTAGTTGAATTTCTGCCTTATCATTAATTTCGCTTCCGAACGTAATTTTATTGATTTGGCATCTTCTGGATTTATATTTTTATTAATATTTTTCCAGTATTTACTTTGAGAAAACTAGAGTGTTTCAAACAGGCTATTGCCTTGAATACTACAGCATGGAATAATGAAGTAGGACTTTGGTTCTATTTTGTTGGTTATCGAACCATAGTAATGGTTAATAGGAGCAGTTGGGGGCATTCGTATT
D152BE	Belgium	Meles meles	2015	Babesia sp. badger type A		AAATAACAATACAGGGCTTATAGTCTTGTAATTGGAATGATGGGAATCTAAACCCTTCCCAGAGTATCAATTGGAGGGCAAGTCTGGTGCCAGCAGCCGCGGTAATTCCAGCTCCAATAGCGTATATTAAAGTTGTTGCAGTTAAGAAGCTCGTAGTTGAATTTCTGCCTTATCATTAATTTCGCTTCCGAACGTAATTTTATTGATTTGGCATCTTCTGGATTTATATTTTTATTAATATTTTTCCAGTATTTACTTTGAGAAAACTAGAGTGTTTCAAACAGGCTATTGCCTTGAATACTACAGCATGGAATAATGAAGTAGGACTTTGGTTCTATTTTGTTGGTTATCGAACCATAGTAATGGTTAATAGGAGCAGTTGGGGGCATTCGTATT
D161BE	Belgium	Meles meles	2015	Babesia sp. badger type A		AAATAACAATACAGGGCTTATAGTCTTGTAATTGGAATGATGGGAATCTAAACCCTTCCCAGAGTATCAATTGGAGGGCAAGTCTGGTGCCAGCAGCCGCGGTAATTCCAGCTCCAATAGCGTATATTAAAGTTGTTGCAGTTAAGAAGCTCGTAGTTGAATTTCTGCCTTATCATTAATTTCGCTTCCGAACGTAATTTTATTGATTTGGCATCTTCTGGATTTATATTTTTATTAATATTTTTCCAGTATTTACTTTGAGAAAACTAGAGTGTTTCAAACAGGCTATTGCCTTGAATACTACAGCATGGAATAATGAAGTAGGACTTTGGTTCTATTTTGTTGGTTATCGAACCATAGTAATGGTTAATAGGAGCAGTTGGGGGCATTCGTATT
D165BE	Belgium	Meles meles	2015	Babesia sp. badger type A		AAATAACAATACAGGGCTTATAGTCTTGTAATTGGAATGATGGGAATCTAAACCCTTCCCAGAGTATCAATTGGAGGGCAAGTCTGGTGCCAGCAGCCGCGGTAATTCCAGCTCCAATAGCGTATATTAAAGTTGTTGCAGTTAAGAAGCTCGTAGTTGAATTTCTGCCTTATCATTAATTTCGCTTCCGAACGTAATTTTATTGATTTGGCATCTTCTGGATTTATATTTTTATTAATATTTTTCCAGTATTTACTTTGAGAAAACTAGAGTGTTTCAAACAGGCTATTGCCTTGAATACTACAGCATGGAATAATGAAGTAGGACTTTGGTTCTATTTTGTTGGTTATCGAACCATAGTAATGGTTAATAGGAGCAGTTGGGGGCATTCGTATT
D205BE	Belgium	Meles meles	2015	Babesia sp. badger type A		AAATAACAATACAGGGCTTATAGTCTTGTAATTGGAATGATGGGAATCTAAACCCTTCCCAGAGTATCAATTGGAGGGCAAGTCTGGTGCCAGCAGCCGCGGTAATTCCAGCTCCAATAGCGTATATTAAAGTTGTTGCAGTTAAGAAGCTCGTAGTTGAATTTCTGCCTTATCATTAATTTCGCTTCCGAACGTAATTTTATTGATTTGGCATCTTCTGGATTTATATTTTTATTAATATTTTTCCAGTATTTACTTTGAGAAAACTAGAGTGTTTCAAACAGGCTATTGCCTTGAATACTACAGCATGGAATAATGAAGTAGGACTTTGGTTCTATTTTGTTGGTTATCGAACCATAGTAATGGTTAATAGGAGCAGTTGGGGGCATTCGTATT
D208BE	Belgium	Meles meles	2015	Babesia sp. badger type A		AAATAACAATACAGGGCTTATAGTCTTGTAATTGGAATGATGGGAATCTAAACCCTTCCCAGAGTATCAATTGGAGGGCAAGTCTGGTGCCAGCAGCCGCGGTAATTCCAGCTCCAATAGCGTATATTAAAGTTGTTGCAGTTAAGAAGCTCGTAGTTGAATTTCTGCCTTATCATTAATTTCGCTTCCGAACGTAATTTTATTGATTTGGCATCTTCTGGATTTATATTTTTATTAATATTTTTCCAGTATTTACTTTGAGAAAACTAGAGTGTTTCAAACAGGCTATTGCCTTGAATACTACAGCATGGAATAATGAAGTAGGACTTTGGTTCTATTTTGTTGGTTATCGAACCATAGTAATGGTTAATAGGAGCAGTTGGGGGCATTCGTATT
D209BE	Belgium	Meles meles	2015	Babesia sp. badger type A		AAATAACAATACAGGGCTTATAGTCTTGTAATTGGAATGATGGGAATCTAAACCCTTCCCAGAGTATCAATTGGAGGGCAAGTCTGGTGCCAGCAGCCGCGGTAATTCCAGCTCCAATAGCGTATATTAAAGTTGTTGCAGTTAAGAAGCTCGTAGTTGAATTTCTGCCTTATCATTAATTTCGCTTCCGAACGTAATTTTATTGATTTGGCATCTTCTGGATTTATATTTTTATTAATATTTTTCCAGTATTTACTTTGAGAAAACTAGAGTGTTTCAAACAGGCTATTGCCTTGAATACTACAGCATGGAATAATGAAGTAGGACTTTGGTTCTATTTTGTTGGTTATCGAACCATAGTAATGGTTAATAGGAGCAGTTGGGGGCATTCGTATT
D232BE	Belgium	Meles meles	2015	Babesia sp. badger type A		AAATAACAATACAGGGCTTATAGTCTTGTAATTGGAATGATGGGAATCTAAACCCTTCCCAGAGTATCAATTGGAGGGCAAGTCTGGTGCCAGCAGCCGCGGTAATTCCAGCTCCAATAGCGTATATTAAAGTTGTTGCAGTTAAGAAGCTCGTAGTTGAATTTCTGCCTTATCATTAATTTCGCTTCCGAACGTAATTTTATTGATTTGGCATCTTCTGGATTTATATTTTTATTAATATTTTTCCAGTATTTACTTTGAGAAAACTAGAGTGTTTCAAACAGGCTATTGCCTTGAATACTACAGCATGGAATAATGAAGTAGGACTTTGGTTCTATTTTGTTGGTTATCGAACCATAGTAATGGTTAATAGGAGCAGTTGGGGGCATTCGTATT
D237BE	Belgium	Meles meles	2015	Babesia sp. badger type A		AAATAACAATACAGGGCTTATAGTCTTGTAATTGGAATGATGGGAATCTAAACCCTTCCCAGAGTATCAATTGGAGGGCAAGTCTGGTGCCAGCAGCCGCGGTAATTCCAGCTCCAATAGCGTATATTAAAGTTGTTGCAGTTAAGAAGCTCGTAGTTGAATTTCTGCCTTATCATTAATTTCGCTTCCGAACGTAATTTTATTGATTTGGCATCTTCTGGATTTATATTTTTATTAATATTTTTCCAGTATTTACTTTGAGAAAACTAGAGTGTTTCAAACAGGCTATTGCCTTGAATACTACAGCATGGAATAATGAAGTAGGACTTTGGTTCTATTTTGTTGGTTATCGAACCATAGTAATGGTTAATAGGAGCAGTTGGGGGCATTCGTATT
D254BE	Belgium	Meles meles	2015	Babesia sp. badger type A		AAATAACAATACAGGGCTTATAGTCTTGTAATTGGAATGATGGGAATCTAAACCCTTCCCAGAGTATCAATTGGAGGGCAAGTCTGGTGCCAGCAGCCGCGGTAATTCCAGCTCCAATAGCGTATATTAAAGTTGTTGCAGTTAAGAAGCTCGTAGTTGAATTTCTGCCTTATCATTAATTTCGCTTCCGAACGTAATTTTATTGATTTGGCATCTTCTGGATTTATATTTTTATTAATATTTTTCCAGTATTTACTTTGAGAAAACTAGAGTGTTTCAAACAGGCTATTGCCTTGAATACTACAGCATGGAATAATGAAGTAGGACTTTGGTTCTATTTTGTTGGTTATCGAACCATAGTAATGGTTAATAGGAGCAGTTGGGGGCATTCGTATT
D257BE	Belgium	Meles meles	2015	Babesia sp. badger type A		AAATAACAATACAGGGCTTATAGTCTTGTAATTGGAATGATGGGAATCTAAACCCTTCCCAGAGTATCAATTGGAGGGCAAGTCTGGTGCCAGCAGCCGCGGTAATTCCAGCTCCAATAGCGTATATTAAAGTTGTTGCAGTTAAGAAGCTCGTAGTTGAATTTCTGCCTTATCATTAATTTCGCTTCCGAACGTAATTTTATTGATTTGGCATCTTCTGGATTTATATTTTTATTAATATTTTTCCAGTATTTACTTTGAGAAAACTAGAGTGTTTCAAACAGGCTATTGCCTTGAATACTACAGCATGGAATAATGAAGTAGGACTTTGGTTCTATTTTGTTGGTTATCGAACCATAGTAATGGTTAATAGGAGCAGTTGGGGGCATTCGTATT
D262BE	Belgium	Meles meles	2015	Babesia sp. badger type A		AAATAACAATACAGGGCTTATAGTCTTGTAATTGGAATGATGGGAATCTAAACCCTTCCCAGAGTATCAATTGGAGGGCAAGTCTGGTGCCAGCAGCCGCGGTAATTCCAGCTCCAATAGCGTATATTAAAGTTGTTGCAGTTAAGAAGCTCGTAGTTGAATTTCTGCCTTATCATTAATTTCGCTTCCGAACGTAATTTTATTGATTTGGCATCTTCTGGATTTATATTTTTATTAATATTTTTCCAGTATTTACTTTGAGAAAACTAGAGTGTTTCAAACAGGCTATTGCCTTGAATACTACAGCATGGAATAATGAAGTAGGACTTTGGTTCTATTTTGTTGGTTATCGAACCATAGTAATGGTTAATAGGAGCAGTTGGGGGCATTCGTATT
D265BE	Belgium	Meles meles	2015	Babesia sp. badger type A		AAATAACAATACAGGGCTTATAGTCTTGTAATTGGAATGATGGGAATCTAAACCCTTCCCAGAGTATCAATTGGAGGGCAAGTCTGGTGCCAGCAGCCGCGGTAATTCCAGCTCCAATAGCGTATATTAAAGTTGTTGCAGTTAAGAAGCTCGTAGTTGAATTTCTGCCTTATCATTAATTTCGCTTCCGAACGTAATTTTATTGATTTGGCATCTTCTGGATTTATATTTTTATTAATATTTTTCCAGTATTTACTTTGAGAAAACTAGAGTGTTTCAAACAGGCTATTGCCTTGAATACTACAGCATGGAATAATGAAGTAGGACTTTGGTTCTATTTTGTTGGTTATCGAACCATAGTAATGGTTAATAGGAGCAGTTGGGGGCATTCGTATT
D267BE	Belgium	Meles meles	2015	Babesia sp. badger type A		AAATAACAATACAGGGCTTATAGTCTTGTAATTGGAATGATGGGAATCTAAACCCTTCCCAGAGTATCAATTGGAGGGCAAGTCTGGTGCCAGCAGCCGCGGTAATTCCAGCTCCAATAGCGTATATTAAAGTTGTTGCAGTTAAGAAGCTCGTAGTTGAATTTCTGCCTTATCATTAATTTCGCTTCCGAACGTAATTTTATTGATTTGGCATCTTCTGGATTTATATTTTTATTAATATTTTTCCAGTATTTACTTTGAGAAAACTAGAGTGTTTCAAACAGGCTATTGCCTTGAATACTACAGCATGGAATAATGAAGTAGGACTTTGGTTCTATTTTGTTGGTTATCGAACCATAGTAATGGTTAATAGGAGCAGTTGGGGGCATTCGTATT
D268BE	Belgium	Meles meles	2015	Babesia sp. badger type A		AAATAACAATACAGGGCTTATAGTCTTGTAATTGGAATGATGGGAATCTAAACCCTTCCCAGAGTATCAATTGGAGGGCAAGTCTGGTGCCAGCAGCCGCGGTAATTCCAGCTCCAATAGCGTATATTAAAGTTGTTGCAGTTAAGAAGCTCGTAGTTGAATTTCTGCCTTATCATTAATTTCGCTTCCGAACGTAATTTTATTGATTTGGCATCTTCTGGATTTATATTTTTATTAATATTTTTCCAGTATTTACTTTGAGAAAACTAGAGTGTTTCAAACAGGCTATTGCCTTGAATACTACAGCATGGAATAATGAAGTAGGACTTTGGTTCTATTTTGTTGGTTATCGAACCATAGTAATGGTTAATAGGAGCAGTTGGGGGCATTCGTATT
D279BE	Belgium	Meles meles	2015	Babesia sp. badger type A		AAATAACAATACAGGGCTTATAGTCTTGTAATTGGAATGATGGGAATCTAAACCCTTCCCAGAGTATCAATTGGAGGGCAAGTCTGGTGCCAGCAGCCGCGGTAATTCCAGCTCCAATAGCGTATATTAAAGTTGTTGCAGTTAAGAAGCTCGTAGTTGAATTTCTGCCTTATCATTAATTTCGCTTCCGAACGTAATTTTATTGATTTGGCATCTTCTGGATTTATATTTTTATTAATATTTTTCCAGTATTTACTTTGAGAAAACTAGAGTGTTTCAAACAGGCTATTGCCTTGAATACTACAGCATGGAATAATGAAGTAGGACTTTGGTTCTATTTTGTTGGTTATCGAACCATAGTAATGGTTAATAGGAGCAGTTGGGGGCATTCGTATT
D281BE	Belgium	Meles meles	2015	Babesia sp. badger type A		AAATAACAATACAGGGCTTATAGTCTTGTAATTGGAATGATGGGAATCTAAACCCTTCCCAGAGTATCAATTGGAGGGCAAGTCTGGTGCCAGCAGCCGCGGTAATTCCAGCTCCAATAGCGTATATTAAAGTTGTTGCAGTTAAGAAGCTCGTAGTTGAATTTCTGCCTTATCATTAATTTCGCTTCCGAACGTAATTTTATTGATTTGGCATCTTCTGGATTTATATTTTTATTAATATTTTTCCAGTATTTACTTTGAGAAAACTAGAGTGTTTCAAACAGGCTATTGCCTTGAATACTACAGCATGGAATAATGAAGTAGGACTTTGGTTCTATTTTGTTGGTTATCGAACCATAGTAATGGTTAATAGGAGCAGTTGGGGGCATTCGTATT
D286BE	Belgium	Meles meles	2015	Babesia sp. badger type A		AAATAACAATACAGGGCTTATAGTCTTGTAATTGGAATGATGGGAATCTAAACCCTTCCCAGAGTATCAATTGGAGGGCAAGTCTGGTGCCAGCAGCCGCGGTAATTCCAGCTCCAATAGCGTATATTAAAGTTGTTGCAGTTAAGAAGCTCGTAGTTGAATTTCTGCCTTATCATTAATTTCGCTTCCGAACGTAATTTTATTGATTTGGCATCTTCTGGATTTATATTTTTATTAATATTTTTCCAGTATTTACTTTGAGAAAACTAGAGTGTTTCAAACAGGCTATTGCCTTGAATACTACAGCATGGAATAATGAAGTAGGACTTTGGTTCTATTTTGTTGGTTATCGAACCATAGTAATGGTTAATAGGAGCAGTTGGGGGCATTCGTATT
D289BE	Belgium	Meles meles	2015	Babesia sp. badger type A		AAATAACAATACAGGGCTTATAGTCTTGTAATTGGAATGATGGGAATCTAAACCCTTCCCAGAGTATCAATTGGAGGGCAAGTCTGGTGCCAGCAGCCGCGGTAATTCCAGCTCCAATAGCGTATATTAAAGTTGTTGCAGTTAAGAAGCTCGTAGTTGAATTTCTGCCTTATCATTAATTTCGCTTCCGAACGTAATTTTATTGATTTGGCATCTTCTGGATTTATATTTTTATTAATATTTTTCCAGTATTTACTTTGAGAAAACTAGAGTGTTTCAAACAGGCTATTGCCTTGAATACTACAGCATGGAATAATGAAGTAGGACTTTGGTTCTATTTTGTTGGTTATCGAACCATAGTAATGGTTAATAGGAGCAGTTGGGGGCATTCGTATT
D301BE	Belgium	Meles meles	2015	Babesia sp. badger type A		AAATAACAATACAGGGCTTATAGTCTTGTAATTGGAATGATGGGAATCTAAACCCTTCCCAGAGTATCAATTGGAGGGCAAGTCTGGTGCCAGCAGCCGCGGTAATTCCAGCTCCAATAGCGTATATTAAAGTTGTTGCAGTTAAGAAGCTCGTAGTTGAATTTCTGCCTTATCATTAATTTCGCTTCCGAACGTAATTTTATTGATTTGGCATCTTCTGGATTTATATTTTTATTAATATTTTTCCAGTATTTACTTTGAGAAAACTAGAGTGTTTCAAACAGGCTATTGCCTTGAATACTACAGCATGGAATAATGAAGTAGGACTTTGGTTCTATTTTGTTGGTTATCGAACCATAGTAATGGTTAATAGGAGCAGTTGGGGGCATTCGTATT
D307BE	Belgium	Meles meles	2015	Babesia sp. badger type A		AAATAACAATACAGGGCTTATAGTCTTGTAATTGGAATGATGGGAATCTAAACCCTTCCCAGAGTATCAATTGGAGGGCAAGTCTGGTGCCAGCAGCCGCGGTAATTCCAGCTCCAATAGCGTATATTAAAGTTGTTGCAGTTAAGAAGCTCGTAGTTGAATTTCTGCCTTATCATTAATTTCGCTTCCGAACGTAATTTTATTGATTTGGCATCTTCTGGATTTATATTTTTATTAATATTTTTCCAGTATTTACTTTGAGAAAACTAGAGTGTTTCAAACAGGCTATTGCCTTGAATACTACAGCATGGAATAATGAAGTAGGACTTTGGTTCTATTTTGTTGGTTATCGAACCATAGTAATGGTTAATAGGAGCAGTTGGGGGCATTCGTATT
D094BE	Belgium	Meles meles	2015	Babesia sp. badger type A		AAATAACAATACAGGGCTTATAGTCTTGTAATTGGAATGATGGGAATCTAAACCCTTCCCAGAGTATCAATTGGAGGGCAAGTCTGGTGCCAGCAGCCGCGGTAATTCCAGCTCCAATAGCGTATATTAAAGTTGTTGCAGTTAAGAAGCTCGTAGTTGAATTTCTGCCTTATCATTAATTTCGCTTCCGAACGTAATTTTATTGATTTGGCATCTTCTGGATTTATATTTTTATTAATATTTTTCCAGTATTTACTTTGAGAAAACTAGAGTGTTTCAAACAGGCTATTGCCTTGAATACTACAGCATGGAATAATGAAGTAGGACTTTGGTTCTATTTTGTTGGTTATCGAACCATAGTAATGGTTAATAGGAGCAGTTGGGGGCATTCGTATT
D309BE	Belgium	Meles meles	2015	Babesia sp. badger type A		AAATAACAATACAGGGCTTATAGTCTTGTAATTGGAATGATGGGAATCTAAACCCTTCCCAGAGTATCAATTGGAGGGCAAGTCTGGTGCCAGCAGCCGCGGTAATTCCAGCTCCAATAGCGTATATTAAAGTTGTTGCAGTTAAGAAGCTCGTAGTTGAATTTCTGCCTTATCATTAATTTCGCTTCCGAACGTAATTTTATTGATTTGGCATCTTCTGGATTTATATTTTTATTAATATTTTTCCAGTATTTACTTTGAGAAAACTAGAGTGTTTCAAACAGGCTATTGCCTTGAATACTACAGCATGGAATAATGAAGTAGGACTTTGGTTCTATTTTGTTGGTTATCGAACCATAGTAATGGTTAATAGGAGCAGTTGGGGGCATTCGTATT
D315BE	Belgium	Meles meles	2015	Babesia sp. badger type A		AAATAACAATACAGGGCTTATAGTCTTGTAATTGGAATGATGGGAATCTAAACCCTTCCCAGAGTATCAATTGGAGGGCAAGTCTGGTGCCAGCAGCCGCGGTAATTCCAGCTCCAATAGCGTATATTAAAGTTGTTGCAGTTAAGAAGCTCGTAGTTGAATTTCTGCCTTATCATTAATTTCGCTTCCGAACGTAATTTTATTGATTTGGCATCTTCTGGATTTATATTTTTATTAATATTTTTCCAGTATTTACTTTGAGAAAACTAGAGTGTTTCAAACAGGCTATTGCCTTGAATACTACAGCATGGAATAATGAAGTAGGACTTTGGTTCTATTTTGTTGGTTATCGAACCATAGTAATGGTTAATAGGAGCAGTTGGGGGCATTCGTATT
D316BE	Belgium	Meles meles	2015	Babesia sp. badger type A		AAATAACAATACAGGGCTTATAGTCTTGTAATTGGAATGATGGGAATCTAAACCCTTCCCAGAGTATCAATTGGAGGGCAAGTCTGGTGCCAGCAGCCGCGGTAATTCCAGCTCCAATAGCGTATATTAAAGTTGTTGCAGTTAAGAAGCTCGTAGTTGAATTTCTGCCTTATCATTAATTTCGCTTCCGAACGTAATTTTATTGATTTGGCATCTTCTGGATTTATATTTTTATTAATATTTTTCCAGTATTTACTTTGAGAAAACTAGAGTGTTTCAAACAGGCTATTGCCTTGAATACTACAGCATGGAATAATGAAGTAGGACTTTGGTTCTATTTTGTTGGTTATCGAACCATAGTAATGGTTAATAGGAGCAGTTGGGGGCATTCGTATT
D10liverNL	Netherlands	Meles meles	2015	Babesia sp. badger type A		AAATAACAATACAGGGCTTATAGTCTTGTAATTGGAATGATGGGAATCTAAACCCTTCCCAGAGTATCAATTGGAGGGCAAGTCTGGTGCCAGCAGCCGCGGTAATTCCAGCTCCAATAGCGTATATTAAAGTTGTTGCAGTTAAGAAGCTCGTAGTTGAATTTCTGCCTTATCATTAATTTCGCTTCCGAACGTAATTTTATTGATTTGGCATCTTCTGGATTTATATTTTTATTAATATTTTTCCAGTATTTACTTTGAGAAAACTAGAGTGTTTCAAACAGGCTATTGCCTTGAATACTACAGCATGGAATAATGAAGTAGGACTTTGGTTCTATTTTGTTGGTTATCGAACCATAGTAATGGTTAATAGGAGCAGTTGGGGGCATTCGTATT
D10spleenNL	Netherlands	Meles meles	2015	Babesia sp. badger type A		AAATAACAATACAGGGCTTATAGTCTTGTAATTGGAATGATGGGAATCTAAACCCTTCCCAGAGTATCAATTGGAGGGCAAGTCTGGTGCCAGCAGCCGCGGTAATTCCAGCTCCAATAGCGTATATTAAAGTTGTTGCAGTTAAGAAGCTCGTAGTTGAATTTCTGCCTTATCATTAATTTCGCTTCCGAACGTAATTTTATTGATTTGGCATCTTCTGGATTTATATTTTTATTAATATTTTTCCAGTATTTACTTTGAGAAAACTAGAGTGTTTCAAACAGGCTATTGCCTTGAATACTACAGCATGGAATAATGAAGTAGGACTTTGGTTCTATTTTGTTGGTTATCGAACCATAGTAATGGTTAATAGGAGCAGTTGGGGGCATTCGTATT
D11liverNL	Netherlands	Meles meles	2015	Babesia sp. badger type A		AAATAACAATACAGGGCTTATAGTCTTGTAATTGGAATGATGGGAATCTAAACCCTTCCCAGAGTATCAATTGGAGGGCAAGTCTGGTGCCAGCAGCCGCGGTAATTCCAGCTCCAATAGCGTATATTAAAGTTGTTGCAGTTAAGAAGCTCGTAGTTGAATTTCTGCCTTATCATTAATTTCGCTTCCGAACGTAATTTTATTGATTTGGCATCTTCTGGATTTATATTTTTATTAATATTTTTCCAGTATTTACTTTGAGAAAACTAGAGTGTTTCAAACAGGCTATTGCCTTGAATACTACAGCATGGAATAATGAAGTAGGACTTTGGTTCTATTTTGTTGGTTATCGAACCATAGTAATGGTTAATAGGAGCAGTTGGGGGCATTCGTATT
D11spleenNL	Netherlands	Meles meles	2015	Babesia sp. badger type A		AAATAACAATACAGGGCTTATAGTCTTGTAATTGGAATGATGGGAATCTAAACCCTTCCCAGAGTATCAATTGGAGGGCAAGTCTGGTGCCAGCAGCCGCGGTAATTCCAGCTCCAATAGCGTATATTAAAGTTGTTGCAGTTAAGAAGCTCGTAGTTGAATTTCTGCCTTATCATTAATTTCGCTTCCGAACGTAATTTTATTGATTTGGCATCTTCTGGATTTATATTTTTATTAATATTTTTCCAGTATTTACTTTGAGAAAACTAGAGTGTTTCAAACAGGCTATTGCCTTGAATACTACAGCATGGAATAATGAAGTAGGACTTTGGTTCTATTTTGTTGGTTATCGAACCATAGTAATGGTTAATAGGAGCAGTTGGGGGCATTCGTATT
D12earNL	Netherlands	Meles meles	2015	Babesia sp. badger type A		AAATAACAATACAGGGCTTATAGTCTTGTAATTGGAATGATGGGAATCTAAACCCTTCCCAGAGTATCAATTGGAGGGCAAGTCTGGTGCCAGCAGCCGCGGTAATTCCAGCTCCAATAGCGTATATTAAAGTTGTTGCAGTTAAGAAGCTCGTAGTTGAATTTCTGCCTTATCATTAATTTCGCTTCCGAACGTAATTTTATTGATTTGGCATCTTCTGGATTTATATTTTTATTAATATTTTTCCAGTATTTACTTTGAGAAAACTAGAGTGTTTCAAACAGGCTATTGCCTTGAATACTACAGCATGGAATAATGAAGTAGGACTTTGGTTCTATTTTGTTGGTTATCGAACCATAGTAATGGTTAATAGGAGCAGTTGGGGGCATTCGTATT
D3spleenNL	Netherlands	Meles meles	2015	Babesia sp. badger type A		AAATAACAATACAGGGCTTATAGTCTTGTAATTGGAATGATGGGAATCTAAACCCTTCCCAGAGTATCAATTGGAGGGCAAGTCTGGTGCCAGCAGCCGCGGTAATTCCAGCTCCAATAGCGTATATTAAAGTTGTTGCAGTTAAGAAGCTCGTAGTTGAATTTCTGCCTTATCATTAATTTCGCTTCCGAACGTAATTTTATTGATTTGGCATCTTCTGGATTTATATTTTTATTAATATTTTTCCAGTATTTACTTTGAGAAAACTAGAGTGTTTCAAACAGGCTATTGCCTTGAATACTACAGCATGGAATAATGAAGTAGGACTTTGGTTCTATTTTGTTGGTTATCGAACCATAGTAATGGTTAATAGGAGCAGTTGGGGGCATTCGTATT
D5spleenNL	Netherlands	Meles meles	2015	Babesia sp. badger type A		AAATAACAATACAGGGCTTATAGTCTTGTAATTGGAATGATGGGAATCTAAACCCTTCCCAGAGTATCAATTGGAGGGCAAGTCTGGTGCCAGCAGCCGCGGTAATTCCAGCTCCAATAGCGTATATTAAAGTTGTTGCAGTTAAGAAGCTCGTAGTTGAATTTCTGCCTTATCATTAATTTCGCTTCCGAACGTAATTTTATTGATTTGGCATCTTCTGGATTTATATTTTTATTAATATTTTTCCAGTATTTACTTTGAGAAAACTAGAGTGTTTCAAACAGGCTATTGCCTTGAATACTACAGCATGGAATAATGAAGTAGGACTTTGGTTCTATTTTGTTGGTTATCGAACCATAGTAATGGTTAATAGGAGCAGTTGGGGGCATTCGTATT
D8liverNL	Netherlands	Meles meles	2015	Babesia sp. badger type A		AAATAACAATACAGGGCTTATAGTCTTGTAATTGGAATGATGGGAATCTAAACCCTTCCCAGAGTATCAATTGGAGGGCAAGTCTGGTGCCAGCAGCCGCGGTAATTCCAGCTCCAATAGCGTATATTAAAGTTGTTGCAGTTAAGAAGCTCGTAGTTGAATTTCTGCCTTATCATTAATTTCGCTTCCGAACGTAATTTTATTGATTTGGCATCTTCTGGATTTATATTTTTATTAATATTTTTCCAGTATTTACTTTGAGAAAACTAGAGTGTTTCAAACAGGCTATTGCCTTGAATACTACAGCATGGAATAATGAAGTAGGACTTTGGTTCTATTTTGTTGGTTATCGAACCATAGTAATGGTTAATAGGAGCAGTTGGGGGCATTCGTATT
D8spleenNL	Netherlands	Meles meles	2015	Babesia sp. badger type A		AAATAACAATACAGGGCTTATAGTCTTGTAATTGGAATGATGGGAATCTAAACCCTTCCCAGAGTATCAATTGGAGGGCAAGTCTGGTGCCAGCAGCCGCGGTAATTCCAGCTCCAATAGCGTATATTAAAGTTGTTGCAGTTAAGAAGCTCGTAGTTGAATTTCTGCCTTATCATTAATTTCGCTTCCGAACGTAATTTTATTGATTTGGCATCTTCTGGATTTATATTTTTATTAATATTTTTCCAGTATTTACTTTGAGAAAACTAGAGTGTTTCAAACAGGCTATTGCCTTGAATACTACAGCATGGAATAATGAAGTAGGACTTTGGTTCTATTTTGTTGGTTATCGAACCATAGTAATGGTTAATAGGAGCAGTTGGGGGCATTCGTATT
D9spleenNL	Netherlands	Meles meles	2015	Babesia sp. badger type A		AAATAACAATACAGGGCTTATAGTCTTGTAATTGGAATGATGGGAATCTAAACCCTTCCCAGAGTATCAATTGGAGGGCAAGTCTGGTGCCAGCAGCCGCGGTAATTCCAGCTCCAATAGCGTATATTAAAGTTGTTGCAGTTAAGAAGCTCGTAGTTGAATTTCTGCCTTATCATTAATTTCGCTTCCGAACGTAATTTTATTGATTTGGCATCTTCTGGATTTATATTTTTATTAATATTTTTCCAGTATTTACTTTGAGAAAACTAGAGTGTTTCAAACAGGCTATTGCCTTGAATACTACAGCATGGAATAATGAAGTAGGACTTTGGTTCTATTTTGTTGGTTATCGAACCATAGTAATGGTTAATAGGAGCAGTTGGGGGCATTCGTATT
D153BE	Belgium	Meles meles	2015	Babesia sp. badger type A		AAATAACAATACAGGGSTTATAGTCTTGTAATTGGAATGATGGGAATCTAAACCCTTCCCAGAGTATCAATTGGAGGGCAAGTCTGGTGCCAGCAGCCGCGGTAATTCCAGCTCCAATAGCGTATATTAAAGTTGTTGCAGTTAAGAAGCTCGTAGTTGAATTTCTGCCTTATCATTAATTTCGCTTCCGAACGTAATTTTATTGATTTGGCATCTTCTGGATTTATATTTTTATTAATATTTTTCCAGTATTTACTTTGAGAAAACTAGAGTGTTTCAAACAGGCTATTGCCTTGAATACTACAGCATGGAATAATGAAGTAGGACTTTGGTTCTATTTTGTTGGTTATCGAACCATAGTAATGGTTAATAGGAGCAGTTGGGGGCATTCGTATT
BegrazingTeek1495	Netherlands	Ixodes ricinus		Babesia microti		AAATAACAATACAGGGCTTAAAGTCTTGTAATTGGAATGATGGGAATCTAAACCCTTCCCAGAGTATCAATTGGAGGGCAAGTCTGGTGCCAGCAGCCGCGGTAATTCCAGCTCCAATAGCGTATATTAAAGTTGTTGCAGTTAAGAAGCTCGTAGTTGAATTTCTGCCTTGTCATTAATCTCGCTTCCGAGCGTTTTTTTATTGGCTTGGCATCTTCTGGATTTGGTGCCTTCGGGTACTATTTTCCAGGATTTACTTTGAGAAAACTAGAGTGTTTCAAACAGGCATTCGCCTTGAATACTACAGCATGGAATAATGAAGTAGGACTTTGGTTCTATTTTGTTGGTTATTGAGCCAGAGTAATGGTTAATAGGAGCAGTTGGGGGCATTCGTATT
BegrazingTeek1553	Netherlands	Ixodes ricinus		Babesia microti		AAATAACAATACAGGGCTTAAAGTCTTGTAATTGGAATGATGGGAATCTAAACCCTTCCCAGAGTATCAATTGGAGGGCAAGTCTGGTGCCAGCAGCCGCGGTAATTCCAGCTCCAATAGCGTATATTAAAGTTGTTGCAGTTAAGAAGCTCGTAGTTGAATTTCTGCCTTGTCATTAATCTCGCTTCCGAGCGTTTTTTTATTGGCTTGGCATCTTCTGGATTTGGTGCCTTCGGGTACTATTTTCCAGGATTTACTTTGAGAAAACTAGAGTGTTTCAAACAGGCATTCGCCTTGAATACTACAGCATGGAATAATGAAGTAGGACTTTGGTTCTATTTTGTTGGTTATTGAGCCAGAGTAATGGTTAATAGGAGCAGTTGGGGGCATTCGTATT
BegrazingTeek1565	Netherlands	Ixodes ricinus		Babesia microti		AAATAACAATACAGGGCTTAAAGTCTTGTAATTGGAATGATGGGAATCTAAACCCTTCCCAGAGTATCAATTGGAGGGCAAGTCTGGTGCCAGCAGCCGCGGTAATTCCAGCTCCAATAGCGTATATTAAAGTTGTTGCAGTTAAGAAGCTCGTAGTTGAATTTCTGCCTTGTCATTAATCTCGCTTCCGAGCGTTTTTTTATTGGCTTGGCATCTTCTGGATTTGGTGCCTTCGGGTACTATTTTCCAGGATTTACTTTGAGAAAACTAGAGTGTTTCAAACAGGCATTCGCCTTGAATACTACAGCATGGAATAATGAAGTAGGACTTTGGTTCTATTTTGTTGGTTATTGAGCCAGAGTAATGGTTAATAGGAGCAGTTGGGGGCATTCGTATT
BegrazingTeek1606	Netherlands	Ixodes ricinus		Babesia microti		AAATAACAATACAGGGCTTAAAGTCTTGTAATTGGAATGATGGGAATCTAAACCCTTCCCAGAGTATCAATTGGAGGGCAAGTCTGGTGCCAGCAGCCGCGGTAATTCCAGCTCCAATAGCGTATATTAAAGTTGTTGCAGTTAAGAAGCTCGTAGTTGAATTTCTGCCTTGTCATTAATCTCGCTTCCGAGCGTTTTTTTATTGGCTTGGCATCTTCTGGATTTGGTGCCTTCGGGTACTATTTTCCAGGATTTACTTTGAGAAAACTAGAGTGTTTCAAACAGGCATTCGCCTTGAATACTACAGCATGGAATAATGAAGTAGGACTTTGGTTCTATTTTGTTGGTTATTGAGCCAGAGTAATGGTTAATAGGAGCAGTTGGGGGCATTCGTATT
BelgieWIV431	Belgium	Ixodes ricinus	2017	Babesia microti	no ambiguous nucleotides	AAATAACAATACAGGGCTTAAAGTCTTGTAATTGGAATGATGGGAATCTAAACCCTTCCCAGAGTATCAATTGGAGGGCAAGTCTGGTGCCAGCAGCCGCGGTAATTCCAGCTCCAATAGCGTATATTAAAGTTGTTGCAGTTAAGAAGCTCGTAGTTGAATTTCTGCCTTGTCATTAATCTCGCTTCCGAGCGTTTTTTTATTGGCTTGGCATCTTCTGGATTTGGTGCCTTCGGGTACTATTTTCCAGGATTTACTTTGAGAAAACTAGAGTGTTTCAAACAGGCATTCGCCTTGAATACTACAGCATGGAATAATGAAGTAGGACTTTGGTTCTATTTTGTTGGTTATTGAGCCAGAGTAATGGTTAATAGGAGCAGTTGGGGGCATTCGTATT
BelgieWIV986	Belgium	Ixodes ricinus	2017	Babesia microti	no ambiguous nucleotides	AAATAACAATACAGGGCTTAAAGTCTTGTAATTGGAATGATGGGAATCTAAACCCTTCCCAGAGTATCAATTGGAGGGCAAGTCTGGTGCCAGCAGCCGCGGTAATTCCAGCTCCAATAGCGTATATTAAAGTTGTTGCAGTTAAGAAGCTCGTAGTTGAATTTCTGCCTTGTCATTAATCTCGCTTCCGAGCGTTTTTTTATTGGCTTGGCATCTTCTGGATTTGGTGCCTTCGGGTACTATTTTCCAGGATTTACTTTGAGAAAACTAGAGTGTTTCAAACAGGCATTCGCCTTGAATACTACAGCATGGAATAATGAAGTAGGACTTTGGTTCTATTTTGTTGGTTATTGAGCCAGAGTAATGGTTAATAGGAGCAGTTGGGGGCATTCGTATT
DuinenkruidbergBab01	Netherlands	Ixodes ricinus	2003	Babesia microti		AAATAACAATACAGGGCTTAAAGTCTTGTAATTGGAATGATGGGAATCTAAACCCTTCCCAGAGTATCAATTGGAGGGCAAGTCTGGTGCCAGCAGCCGCGGTAATTCCAGCTCCAATAGCGTATATTAAAGTTGTTGCAGTTAAGAAGCTCGTAGTTGAATTTCTGCCTTGTCATTAATCTCGCTTCCGAGCGTTTTTTTATTGGCTTGGCATCTTCTGGATTTGGTGCCTTCGGGTACTATTTTCCAGGATTTACTTTGAGAAAACTAGAGTGTTTCAAACAGGCATTCGCCTTGAATACTACAGCATGGAATAATGAAGTAGGACTTTGGTTCTATTTTGTTGGTTATTGAGCCAGAGTAATGGTTAATAGGAGCAGTTGGGGGCATTCGTATT
DuinenkruidbergBab02	Netherlands	Ixodes ricinus	2005	Babesia microti		AAATAACAATACAGGGCTTAAAGTCTTGTAATTGGAATGATGGGAATCTAAACCCTTCCCAGAGTATCAATTGGAGGGCAAGTCTGGTGCCAGCAGCCGCGGTAATTCCAGCTCCAATAGCGTATATTAAAGTTGTTGCAGTTAAGAAGCTCGTAGTTGAATTTCTGCCTTGTCATTAATCTCGCTTCCGAGCGTTTTTTTATTGGCTTGGCATCTTCTGGATTTGGTGCCTTCGGGTACTATTTTCCAGGATTTACTTTGAGAAAACTAGAGTGTTTCAAACAGGCATTCGCCTTGAATACTACAGCATGGAATAATGAAGTAGGACTTTGGTTCTATTTTGTTGGTTATTGAGCCAGAGTAATGGTTAATAGGAGCAGTTGGGGGCATTCGTATT
RJ109	Netherlands	Ixodes ricinus	2012	Babesia microti	no ambiguous nucleotides	AAATAACAATACAGGGCTTAAAGTCTTGTAATTGGAATGATGGGAATCTAAACCCTTCCCAGAGTATCAATTGGAGGGCAAGTCTGGTGCCAGCAGCCGCGGTAATTCCAGCTCCAATAGCGTATATTAAAGTTGTTGCAGTTAAGAAGCTCGTAGTTGAATTTCTGCCTTGTCATTAATCTCGCTTCCGAGCGTTTTTTTATTGGCTTGGCATCTTCTGGATTTGGTGCCTTCGGGTACTATTTTCCAGGATTTACTTTGAGAAAACTAGAGTGTTTCAAACAGGCATTCGCCTTGAATACTACAGCATGGAATAATGAAGTAGGACTTTGGTTCTATTTTGTTGGTTATTGAGCCAGAGTAATGGTTAATAGGAGCAGTTGGGGGCATTCGTATT
RJ139	Netherlands	Ixodes ricinus	2012	Babesia microti	no ambiguous nucleotides	AAATAACAATACAGGGCTTAAAGTCTTGTAATTGGAATGATGGGAATCTAAACCCTTCCCAGAGTATCAATTGGAGGGCAAGTCTGGTGCCAGCAGCCGCGGTAATTCCAGCTCCAATAGCGTATATTAAAGTTGTTGCAGTTAAGAAGCTCGTAGTTGAATTTCTGCCTTGTCATTAATCTCGCTTCCGAGCGTTTTTTTATTGGCTTGGCATCTTCTGGATTTGGTGCCTTCGGGTACTATTTTCCAGGATTTACTTTGAGAAAACTAGAGTGTTTCAAACAGGCATTCGCCTTGAATACTACAGCATGGAATAATGAAGTAGGACTTTGGTTCTATTTTGTTGGTTATTGAGCCAGAGTAATGGTTAATAGGAGCAGTTGGGGGCATTCGTATT
RJ1643	Netherlands	Ixodes ricinus	2013	Babesia microti	no ambiguous nucleotides	AAATAACAATACAGGGCTTAAAGTCTTGTAATTGGAATGATGGGAATCTAAACCCTTCCCAGAGTATCAATTGGAGGGCAAGTCTGGTGCCAGCAGCCGCGGTAATTCCAGCTCCAATAGCGTATATTAAAGTTGTTGCAGTTAAGAAGCTCGTAGTTGAATTTCTGCCTTGTCATTAATCTCGCTTCCGAGCGTTTTTTTATTGGCTTGGCATCTTCTGGATTTGGTGCCTTCGGGTACTATTTTCCAGGATTTACTTTGAGAAAACTAGAGTGTTTCAAACAGGCATTCGCCTTGAATACTACAGCATGGAATAATGAAGTAGGACTTTGGTTCTATTTTGTTGGTTATTGAGCCAGAGTAATGGTTAATAGGAGCAGTTGGGGGCATTCGTATT
RJ1644	Netherlands	Ixodes ricinus	2013	Babesia microti	no ambiguous nucleotides	AAATAACAATACAGGGCTTAAAGTCTTGTAATTGGAATGATGGGAATCTAAACCCTTCCCAGAGTATCAATTGGAGGGCAAGTCTGGTGCCAGCAGCCGCGGTAATTCCAGCTCCAATAGCGTATATTAAAGTTGTTGCAGTTAAGAAGCTCGTAGTTGAATTTCTGCCTTGTCATTAATCTCGCTTCCGAGCGTTTTTTTATTGGCTTGGCATCTTCTGGATTTGGTGCCTTCGGGTACTATTTTCCAGGATTTACTTTGAGAAAACTAGAGTGTTTCAAACAGGCATTCGCCTTGAATACTACAGCATGGAATAATGAAGTAGGACTTTGGTTCTATTTTGTTGGTTATTGAGCCAGAGTAATGGTTAATAGGAGCAGTTGGGGGCATTCGTATT
RJ1652	Netherlands	Ixodes ricinus	2013	Babesia microti	no ambiguous nucleotides	AAATAACAATACAGGGCTTAAAGTCTTGTAATTGGAATGATGGGAATCTAAACCCTTCCCAGAGTATCAATTGGAGGGCAAGTCTGGTGCCAGCAGCCGCGGTAATTCCAGCTCCAATAGCGTATATTAAAGTTGTTGCAGTTAAGAAGCTCGTAGTTGAATTTCTGCCTTGTCATTAATCTCGCTTCCGAGCGTTTTTTTATTGGCTTGGCATCTTCTGGATTTGGTGCCTTCGGGTACTATTTTCCAGGATTTACTTTGAGAAAACTAGAGTGTTTCAAACAGGCATTCGCCTTGAATACTACAGCATGGAATAATGAAGTAGGACTTTGGTTCTATTTTGTTGGTTATTGAGCCAGAGTAATGGTTAATAGGAGCAGTTGGGGGCATTCGTATT
RJ1654	Netherlands	Ixodes ricinus	2013	Babesia microti	no ambiguous nucleotides	AAATAACAATACAGGGCTTAAAGTCTTGTAATTGGAATGATGGGAATCTAAACCCTTCCCAGAGTATCAATTGGAGGGCAAGTCTGGTGCCAGCAGCCGCGGTAATTCCAGCTCCAATAGCGTATATTAAAGTTGTTGCAGTTAAGAAGCTCGTAGTTGAATTTCTGCCTTGTCATTAATCTCGCTTCCGAGCGTTTTTTTATTGGCTTGGCATCTTCTGGATTTGGTGCCTTCGGGTACTATTTTCCAGGATTTACTTTGAGAAAACTAGAGTGTTTCAAACAGGCATTCGCCTTGAATACTACAGCATGGAATAATGAAGTAGGACTTTGGTTCTATTTTGTTGGTTATTGAGCCAGAGTAATGGTTAATAGGAGCAGTTGGGGGCATTCGTATT
RJ1656	Netherlands	Ixodes ricinus	2013	Babesia microti	no ambiguous nucleotides	AAATAACAATACAGGGCTTAAAGTCTTGTAATTGGAATGATGGGAATCTAAACCCTTCCCAGAGTATCAATTGGAGGGCAAGTCTGGTGCCAGCAGCCGCGGTAATTCCAGCTCCAATAGCGTATATTAAAGTTGTTGCAGTTAAGAAGCTCGTAGTTGAATTTCTGCCTTGTCATTAATCTCGCTTCCGAGCGTTTTTTTATTGGCTTGGCATCTTCTGGATTTGGTGCCTTCGGGTACTATTTTCCAGGATTTACTTTGAGAAAACTAGAGTGTTTCAAACAGGCATTCGCCTTGAATACTACAGCATGGAATAATGAAGTAGGACTTTGGTTCTATTTTGTTGGTTATTGAGCCAGAGTAATGGTTAATAGGAGCAGTTGGGGGCATTCGTATT
RJ1659	Netherlands	Ixodes ricinus	2013	Babesia microti	no ambiguous nucleotides	AAATAACAATACAGGGCTTAAAGTCTTGTAATTGGAATGATGGGAATCTAAACCCTTCCCAGAGTATCAATTGGAGGGCAAGTCTGGTGCCAGCAGCCGCGGTAATTCCAGCTCCAATAGCGTATATTAAAGTTGTTGCAGTTAAGAAGCTCGTAGTTGAATTTCTGCCTTGTCATTAATCTCGCTTCCGAGCGTTTTTTTATTGGCTTGGCATCTTCTGGATTTGGTGCCTTCGGGTACTATTTTCCAGGATTTACTTTGAGAAAACTAGAGTGTTTCAAACAGGCATTCGCCTTGAATACTACAGCATGGAATAATGAAGTAGGACTTTGGTTCTATTTTGTTGGTTATTGAGCCAGAGTAATGGTTAATAGGAGCAGTTGGGGGCATTCGTATT
RJ1661	Netherlands	Ixodes ricinus	2013	Babesia microti	no ambiguous nucleotides	AAATAACAATACAGGGCTTAAAGTCTTGTAATTGGAATGATGGGAATCTAAACCCTTCCCAGAGTATCAATTGGAGGGCAAGTCTGGTGCCAGCAGCCGCGGTAATTCCAGCTCCAATAGCGTATATTAAAGTTGTTGCAGTTAAGAAGCTCGTAGTTGAATTTCTGCCTTGTCATTAATCTCGCTTCCGAGCGTTTTTTTATTGGCTTGGCATCTTCTGGATTTGGTGCCTTCGGGTACTATTTTCCAGGATTTACTTTGAGAAAACTAGAGTGTTTCAAACAGGCATTCGCCTTGAATACTACAGCATGGAATAATGAAGTAGGACTTTGGTTCTATTTTGTTGGTTATTGAGCCAGAGTAATGGTTAATAGGAGCAGTTGGGGGCATTCGTATT
RJ2754	Netherlands	Ixodes ricinus	2013	Babesia microti	no ambiguous nucleotides	AAATAACAATACAGGGCTTAAAGTCTTGTAATTGGAATGATGGGAATCTAAACCCTTCCCAGAGTATCAATTGGAGGGCAAGTCTGGTGCCAGCAGCCGCGGTAATTCCAGCTCCAATAGCGTATATTAAAGTTGTTGCAGTTAAGAAGCTCGTAGTTGAATTTCTGCCTTGTCATTAATCTCGCTTCCGAGCGTTTTTTTATTGGCTTGGCATCTTCTGGATTTGGTGCCTTCGGGTACTATTTTCCAGGATTTACTTTGAGAAAACTAGAGTGTTTCAAACAGGCATTCGCCTTGAATACTACAGCATGGAATAATGAAGTAGGACTTTGGTTCTATTTTGTTGGTTATTGAGCCAGAGTAATGGTTAATAGGAGCAGTTGGGGGCATTCGTATT
RJ2803	Netherlands	Ixodes ricinus	2013	Babesia microti	no ambiguous nucleotides	AAATAACAATACAGGGCTTAAAGTCTTGTAATTGGAATGATGGGAATCTAAACCCTTCCCAGAGTATCAATTGGAGGGCAAGTCTGGTGCCAGCAGCCGCGGTAATTCCAGCTCCAATAGCGTATATTAAAGTTGTTGCAGTTAAGAAGCTCGTAGTTGAATTTCTGCCTTGTCATTAATCTCGCTTCCGAGCGTTTTTTTATTGGCTTGGCATCTTCTGGATTTGGTGCCTTCGGGTACTATTTTCCAGGATTTACTTTGAGAAAACTAGAGTGTTTCAAACAGGCATTCGCCTTGAATACTACAGCATGGAATAATGAAGTAGGACTTTGGTTCTATTTTGTTGGTTATTGAGCCAGAGTAATGGTTAATAGGAGCAGTTGGGGGCATTCGTATT
RJ2841	Netherlands	Ixodes ricinus	2013	Babesia microti	no ambiguous nucleotides	AAATAACAATACAGGGCTTAAAGTCTTGTAATTGGAATGATGGGAATCTAAACCCTTCCCAGAGTATCAATTGGAGGGCAAGTCTGGTGCCAGCAGCCGCGGTAATTCCAGCTCCAATAGCGTATATTAAAGTTGTTGCAGTTAAGAAGCTCGTAGTTGAATTTCTGCCTTGTCATTAATCTCGCTTCCGAGCGTTTTTTTATTGGCTTGGCATCTTCTGGATTTGGTGCCTTCGGGTACTATTTTCCAGGATTTACTTTGAGAAAACTAGAGTGTTTCAAACAGGCATTCGCCTTGAATACTACAGCATGGAATAATGAAGTAGGACTTTGGTTCTATTTTGTTGGTTATTGAGCCAGAGTAATGGTTAATAGGAGCAGTTGGGGGCATTCGTATT
RJ330	Netherlands	Ixodes ricinus	2012	Babesia microti	no ambiguous nucleotides	AAATAACAATACAGGGCTTAAAGTCTTGTAATTGGAATGATGGGAATCTAAACCCTTCCCAGAGTATCAATTGGAGGGCAAGTCTGGTGCCAGCAGCCGCGGTAATTCCAGCTCCAATAGCGTATATTAAAGTTGTTGCAGTTAAGAAGCTCGTAGTTGAATTTCTGCCTTGTCATTAATCTCGCTTCCGAGCGTTTTTTTATTGGCTTGGCATCTTCTGGATTTGGTGCCTTCGGGTACTATTTTCCAGGATTTACTTTGAGAAAACTAGAGTGTTTCAAACAGGCATTCGCCTTGAATACTACAGCATGGAATAATGAAGTAGGACTTTGGTTCTATTTTGTTGGTTATTGAGCCAGAGTAATGGTTAATAGGAGCAGTTGGGGGCATTCGTATT
RJ331	Netherlands	Ixodes ricinus	2012	Babesia microti	no ambiguous nucleotides	AAATAACAATACAGGGCTTAAAGTCTTGTAATTGGAATGATGGGAATCTAAACCCTTCCCAGAGTATCAATTGGAGGGCAAGTCTGGTGCCAGCAGCCGCGGTAATTCCAGCTCCAATAGCGTATATTAAAGTTGTTGCAGTTAAGAAGCTCGTAGTTGAATTTCTGCCTTGTCATTAATCTCGCTTCCGAGCGTTTTTTTATTGGCTTGGCATCTTCTGGATTTGGTGCCTTCGGGTACTATTTTCCAGGATTTACTTTGAGAAAACTAGAGTGTTTCAAACAGGCATTCGCCTTGAATACTACAGCATGGAATAATGAAGTAGGACTTTGGTTCTATTTTGTTGGTTATTGAGCCAGAGTAATGGTTAATAGGAGCAGTTGGGGGCATTCGTATT
RJ501	Netherlands	Ixodes ricinus	2012	Babesia microti	no ambiguous nucleotides	AAATAACAATACAGGGCTTAAAGTCTTGTAATTGGAATGATGGGAATCTAAACCCTTCCCAGAGTATCAATTGGAGGGCAAGTCTGGTGCCAGCAGCCGCGGTAATTCCAGCTCCAATAGCGTATATTAAAGTTGTTGCAGTTAAGAAGCTCGTAGTTGAATTTCTGCCTTGTCATTAATCTCGCTTCCGAGCGTTTTTTTATTGGCTTGGCATCTTCTGGATTTGGTGCCTTCGGGTACTATTTTCCAGGATTTACTTTGAGAAAACTAGAGTGTTTCAAACAGGCATTCGCCTTGAATACTACAGCATGGAATAATGAAGTAGGACTTTGGTTCTATTTTGTTGGTTATTGAGCCAGAGTAATGGTTAATAGGAGCAGTTGGGGGCATTCGTATT
RJ507	Netherlands	Ixodes ricinus	2012	Babesia microti	no ambiguous nucleotides	AAATAACAATACAGGGCTTAAAGTCTTGTAATTGGAATGATGGGAATCTAAACCCTTCCCAGAGTATCAATTGGAGGGCAAGTCTGGTGCCAGCAGCCGCGGTAATTCCAGCTCCAATAGCGTATATTAAAGTTGTTGCAGTTAAGAAGCTCGTAGTTGAATTTCTGCCTTGTCATTAATCTCGCTTCCGAGCGTTTTTTTATTGGCTTGGCATCTTCTGGATTTGGTGCCTTCGGGTACTATTTTCCAGGATTTACTTTGAGAAAACTAGAGTGTTTCAAACAGGCATTCGCCTTGAATACTACAGCATGGAATAATGAAGTAGGACTTTGGTTCTATTTTGTTGGTTATTGAGCCAGAGTAATGGTTAATAGGAGCAGTTGGGGGCATTCGTATT
RJ509	Netherlands	Ixodes ricinus	2012	Babesia microti	no ambiguous nucleotides	AAATAACAATACAGGGCTTAAAGTCTTGTAATTGGAATGATGGGAATCTAAACCCTTCCCAGAGTATCAATTGGAGGGCAAGTCTGGTGCCAGCAGCCGCGGTAATTCCAGCTCCAATAGCGTATATTAAAGTTGTTGCAGTTAAGAAGCTCGTAGTTGAATTTCTGCCTTGTCATTAATCTCGCTTCCGAGCGTTTTTTTATTGGCTTGGCATCTTCTGGATTTGGTGCCTTCGGGTACTATTTTCCAGGATTTACTTTGAGAAAACTAGAGTGTTTCAAACAGGCATTCGCCTTGAATACTACAGCATGGAATAATGAAGTAGGACTTTGGTTCTATTTTGTTGGTTATTGAGCCAGAGTAATGGTTAATAGGAGCAGTTGGGGGCATTCGTATT
RJ514	Netherlands	Ixodes ricinus	2012	Babesia microti	no ambiguous nucleotides	AAATAACAATACAGGGCTTAAAGTCTTGTAATTGGAATGATGGGAATCTAAACCCTTCCCAGAGTATCAATTGGAGGGCAAGTCTGGTGCCAGCAGCCGCGGTAATTCCAGCTCCAATAGCGTATATTAAAGTTGTTGCAGTTAAGAAGCTCGTAGTTGAATTTCTGCCTTGTCATTAATCTCGCTTCCGAGCGTTTTTTTATTGGCTTGGCATCTTCTGGATTTGGTGCCTTCGGGTACTATTTTCCAGGATTTACTTTGAGAAAACTAGAGTGTTTCAAACAGGCATTCGCCTTGAATACTACAGCATGGAATAATGAAGTAGGACTTTGGTTCTATTTTGTTGGTTATTGAGCCAGAGTAATGGTTAATAGGAGCAGTTGGGGGCATTCGTATT
RJ5407	Netherlands	Ixodes ricinus	2014	Babesia microti	no ambiguous nucleotides	AAATAACAATACAGGGCTTAAAGTCTTGTAATTGGAATGATGGGAATCTAAACCCTTCCCAGAGTATCAATTGGAGGGCAAGTCTGGTGCCAGCAGCCGCGGTAATTCCAGCTCCAATAGCGTATATTAAAGTTGTTGCAGTTAAGAAGCTCGTAGTTGAATTTCTGCCTTGTCATTAATCTCGCTTCCGAGCGTTTTTTTATTGGCTTGGCATCTTCTGGATTTGGTGCCTTCGGGTACTATTTTCCAGGATTTACTTTGAGAAAACTAGAGTGTTTCAAACAGGCATTCGCCTTGAATACTACAGCATGGAATAATGAAGTAGGACTTTGGTTCTATTTTGTTGGTTATTGAGCCAGAGTAATGGTTAATAGGAGCAGTTGGGGGCATTCGTATT
RJ5495	Netherlands	Ixodes ricinus	2014	Babesia microti	no ambiguous nucleotides	AAATAACAATACAGGGCTTAAAGTCTTGTAATTGGAATGATGGGAATCTAAACCCTTCCCAGAGTATCAATTGGAGGGCAAGTCTGGTGCCAGCAGCCGCGGTAATTCCAGCTCCAATAGCGTATATTAAAGTTGTTGCAGTTAAGAAGCTCGTAGTTGAATTTCTGCCTTGTCATTAATCTCGCTTCCGAGCGTTTTTTTATTGGCTTGGCATCTTCTGGATTTGGTGCCTTCGGGTACTATTTTCCAGGATTTACTTTGAGAAAACTAGAGTGTTTCAAACAGGCATTCGCCTTGAATACTACAGCATGGAATAATGAAGTAGGACTTTGGTTCTATTTTGTTGGTTATTGAGCCAGAGTAATGGTTAATAGGAGCAGTTGGGGGCATTCGTATT
RJ5512	Netherlands	Ixodes ricinus	2014	Babesia microti	no ambiguous nucleotides	AAATAACAATACAGGGCTTAAAGTCTTGTAATTGGAATGATGGGAATCTAAACCCTTCCCAGAGTATCAATTGGAGGGCAAGTCTGGTGCCAGCAGCCGCGGTAATTCCAGCTCCAATAGCGTATATTAAAGTTGTTGCAGTTAAGAAGCTCGTAGTTGAATTTCTGCCTTGTCATTAATCTCGCTTCCGAGCGTTTTTTTATTGGCTTGGCATCTTCTGGATTTGGTGCCTTCGGGTACTATTTTCCAGGATTTACTTTGAGAAAACTAGAGTGTTTCAAACAGGCATTCGCCTTGAATACTACAGCATGGAATAATGAAGTAGGACTTTGGTTCTATTTTGTTGGTTATTGAGCCAGAGTAATGGTTAATAGGAGCAGTTGGGGGCATTCGTATT
RJ5654	Netherlands	Ixodes ricinus	2015	Babesia microti	no ambiguous nucleotides	AAATAACAATACAGGGCTTAAAGTCTTGTAATTGGAATGATGGGAATCTAAACCCTTCCCAGAGTATCAATTGGAGGGCAAGTCTGGTGCCAGCAGCCGCGGTAATTCCAGCTCCAATAGCGTATATTAAAGTTGTTGCAGTTAAGAAGCTCGTAGTTGAATTTCTGCCTTGTCATTAATCTCGCTTCCGAGCGTTTTTTTATTGGCTTGGCATCTTCTGGATTTGGTGCCTTCGGGTACTATTTTCCAGGATTTACTTTGAGAAAACTAGAGTGTTTCAAACAGGCATTCGCCTTGAATACTACAGCATGGAATAATGAAGTAGGACTTTGGTTCTATTTTGTTGGTTATTGAGCCAGAGTAATGGTTAATAGGAGCAGTTGGGGGCATTCGTATT
RJ5657	Netherlands	Ixodes ricinus	2015	Babesia microti	no ambiguous nucleotides	AAATAACAATACAGGGCTTAAAGTCTTGTAATTGGAATGATGGGAATCTAAACCCTTCCCAGAGTATCAATTGGAGGGCAAGTCTGGTGCCAGCAGCCGCGGTAATTCCAGCTCCAATAGCGTATATTAAAGTTGTTGCAGTTAAGAAGCTCGTAGTTGAATTTCTGCCTTGTCATTAATCTCGCTTCCGAGCGTTTTTTTATTGGCTTGGCATCTTCTGGATTTGGTGCCTTCGGGTACTATTTTCCAGGATTTACTTTGAGAAAACTAGAGTGTTTCAAACAGGCATTCGCCTTGAATACTACAGCATGGAATAATGAAGTAGGACTTTGGTTCTATTTTGTTGGTTATTGAGCCAGAGTAATGGTTAATAGGAGCAGTTGGGGGCATTCGTATT
RJ61	Netherlands	Ixodes ricinus	2012	Babesia microti	no ambiguous nucleotides	AAATAACAATACAGGGCTTAAAGTCTTGTAATTGGAATGATGGGAATCTAAACCCTTCCCAGAGTATCAATTGGAGGGCAAGTCTGGTGCCAGCAGCCGCGGTAATTCCAGCTCCAATAGCGTATATTAAAGTTGTTGCAGTTAAGAAGCTCGTAGTTGAATTTCTGCCTTGTCATTAATCTCGCTTCCGAGCGTTTTTTTATTGGCTTGGCATCTTCTGGATTTGGTGCCTTCGGGTACTATTTTCCAGGATTTACTTTGAGAAAACTAGAGTGTTTCAAACAGGCATTCGCCTTGAATACTACAGCATGGAATAATGAAGTAGGACTTTGGTTCTATTTTGTTGGTTATTGAGCCAGAGTAATGGTTAATAGGAGCAGTTGGGGGCATTCGTATT
RJ6553	Netherlands	Ixodes ricinus	2015	Babesia microti	no ambiguous nucleotides	AAATAACAATACAGGGCTTAAAGTCTTGTAATTGGAATGATGGGAATCTAAACCCTTCCCAGAGTATCAATTGGAGGGCAAGTCTGGTGCCAGCAGCCGCGGTAATTCCAGCTCCAATAGCGTATATTAAAGTTGTTGCAGTTAAGAAGCTCGTAGTTGAATTTCTGCCTTGTCATTAATCTCGCTTCCGAGCGTTTTTTTATTGGCTTGGCATCTTCTGGATTTGGTGCCTTCGGGTACTATTTTCCAGGATTTACTTTGAGAAAACTAGAGTGTTTCAAACAGGCATTCGCCTTGAATACTACAGCATGGAATAATGAAGTAGGACTTTGGTTCTATTTTGTTGGTTATTGAGCCAGAGTAATGGTTAATAGGAGCAGTTGGGGGCATTCGTATT
RJ6554	Netherlands	Ixodes ricinus	2015	Babesia microti	no ambiguous nucleotides	AAATAACAATACAGGGCTTAAAGTCTTGTAATTGGAATGATGGGAATCTAAACCCTTCCCAGAGTATCAATTGGAGGGCAAGTCTGGTGCCAGCAGCCGCGGTAATTCCAGCTCCAATAGCGTATATTAAAGTTGTTGCAGTTAAGAAGCTCGTAGTTGAATTTCTGCCTTGTCATTAATCTCGCTTCCGAGCGTTTTTTTATTGGCTTGGCATCTTCTGGATTTGGTGCCTTCGGGTACTATTTTCCAGGATTTACTTTGAGAAAACTAGAGTGTTTCAAACAGGCATTCGCCTTGAATACTACAGCATGGAATAATGAAGTAGGACTTTGGTTCTATTTTGTTGGTTATTGAGCCAGAGTAATGGTTAATAGGAGCAGTTGGGGGCATTCGTATT
RJ6574	Netherlands	Ixodes ricinus	2015	Babesia microti	no ambiguous nucleotides	AAATAACAATACAGGGCTTAAAGTCTTGTAATTGGAATGATGGGAATCTAAACCCTTCCCAGAGTATCAATTGGAGGGCAAGTCTGGTGCCAGCAGCCGCGGTAATTCCAGCTCCAATAGCGTATATTAAAGTTGTTGCAGTTAAGAAGCTCGTAGTTGAATTTCTGCCTTGTCATTAATCTCGCTTCCGAGCGTTTTTTTATTGGCTTGGCATCTTCTGGATTTGGTGCCTTCGGGTACTATTTTCCAGGATTTACTTTGAGAAAACTAGAGTGTTTCAAACAGGCATTCGCCTTGAATACTACAGCATGGAATAATGAAGTAGGACTTTGGTTCTATTTTGTTGGTTATTGAGCCAGAGTAATGGTTAATAGGAGCAGTTGGGGGCATTCGTATT
RJ6634	Netherlands	Ixodes ricinus	2015	Babesia microti	no ambiguous nucleotides	AAATAACAATACAGGGCTTAAAGTCTTGTAATTGGAATGATGGGAATCTAAACCCTTCCCAGAGTATCAATTGGAGGGCAAGTCTGGTGCCAGCAGCCGCGGTAATTCCAGCTCCAATAGCGTATATTAAAGTTGTTGCAGTTAAGAAGCTCGTAGTTGAATTTCTGCCTTGTCATTAATCTCGCTTCCGAGCGTTTTTTTATTGGCTTGGCATCTTCTGGATTTGGTGCCTTCGGGTACTATTTTCCAGGATTTACTTTGAGAAAACTAGAGTGTTTCAAACAGGCATTCGCCTTGAATACTACAGCATGGAATAATGAAGTAGGACTTTGGTTCTATTTTGTTGGTTATTGAGCCAGAGTAATGGTTAATAGGAGCAGTTGGGGGCATTCGTATT
RJ6637	Netherlands	Ixodes ricinus	2015	Babesia microti	no ambiguous nucleotides	AAATAACAATACAGGGCTTAAAGTCTTGTAATTGGAATGATGGGAATCTAAACCCTTCCCAGAGTATCAATTGGAGGGCAAGTCTGGTGCCAGCAGCCGCGGTAATTCCAGCTCCAATAGCGTATATTAAAGTTGTTGCAGTTAAGAAGCTCGTAGTTGAATTTCTGCCTTGTCATTAATCTCGCTTCCGAGCGTTTTTTTATTGGCTTGGCATCTTCTGGATTTGGTGCCTTCGGGTACTATTTTCCAGGATTTACTTTGAGAAAACTAGAGTGTTTCAAACAGGCATTCGCCTTGAATACTACAGCATGGAATAATGAAGTAGGACTTTGGTTCTATTTTGTTGGTTATTGAGCCAGAGTAATGGTTAATAGGAGCAGTTGGGGGCATTCGTATT
RJ6839	Netherlands	Ixodes ricinus	2015	Babesia microti	no ambiguous nucleotides	AAATAACAATACAGGGCTTAAAGTCTTGTAATTGGAATGATGGGAATCTAAACCCTTCCCAGAGTATCAATTGGAGGGCAAGTCTGGTGCCAGCAGCCGCGGTAATTCCAGCTCCAATAGCGTATATTAAAGTTGTTGCAGTTAAGAAGCTCGTAGTTGAATTTCTGCCTTGTCATTAATCTCGCTTCCGAGCGTTTTTTTATTGGCTTGGCATCTTCTGGATTTGGTGCCTTCGGGTACTATTTTCCAGGATTTACTTTGAGAAAACTAGAGTGTTTCAAACAGGCATTCGCCTTGAATACTACAGCATGGAATAATGAAGTAGGACTTTGGTTCTATTTTGTTGGTTATTGAGCCAGAGTAATGGTTAATAGGAGCAGTTGGGGGCATTCGTATT
RJ6841	Netherlands	Ixodes ricinus	2015	Babesia microti	no ambiguous nucleotides	AAATAACAATACAGGGCTTAAAGTCTTGTAATTGGAATGATGGGAATCTAAACCCTTCCCAGAGTATCAATTGGAGGGCAAGTCTGGTGCCAGCAGCCGCGGTAATTCCAGCTCCAATAGCGTATATTAAAGTTGTTGCAGTTAAGAAGCTCGTAGTTGAATTTCTGCCTTGTCATTAATCTCGCTTCCGAGCGTTTTTTTATTGGCTTGGCATCTTCTGGATTTGGTGCCTTCGGGTACTATTTTCCAGGATTTACTTTGAGAAAACTAGAGTGTTTCAAACAGGCATTCGCCTTGAATACTACAGCATGGAATAATGAAGTAGGACTTTGGTTCTATTTTGTTGGTTATTGAGCCAGAGTAATGGTTAATAGGAGCAGTTGGGGGCATTCGTATT
RJ6845	Netherlands	Ixodes ricinus	2015	Babesia microti	no ambiguous nucleotides	AAATAACAATACAGGGCTTAAAGTCTTGTAATTGGAATGATGGGAATCTAAACCCTTCCCAGAGTATCAATTGGAGGGCAAGTCTGGTGCCAGCAGCCGCGGTAATTCCAGCTCCAATAGCGTATATTAAAGTTGTTGCAGTTAAGAAGCTCGTAGTTGAATTTCTGCCTTGTCATTAATCTCGCTTCCGAGCGTTTTTTTATTGGCTTGGCATCTTCTGGATTTGGTGCCTTCGGGTACTATTTTCCAGGATTTACTTTGAGAAAACTAGAGTGTTTCAAACAGGCATTCGCCTTGAATACTACAGCATGGAATAATGAAGTAGGACTTTGGTTCTATTTTGTTGGTTATTGAGCCAGAGTAATGGTTAATAGGAGCAGTTGGGGGCATTCGTATT
RJ6856	Netherlands	Ixodes ricinus	2015	Babesia microti	no ambiguous nucleotides	AAATAACAATACAGGGCTTAAAGTCTTGTAATTGGAATGATGGGAATCTAAACCCTTCCCAGAGTATCAATTGGAGGGCAAGTCTGGTGCCAGCAGCCGCGGTAATTCCAGCTCCAATAGCGTATATTAAAGTTGTTGCAGTTAAGAAGCTCGTAGTTGAATTTCTGCCTTGTCATTAATCTCGCTTCCGAGCGTTTTTTTATTGGCTTGGCATCTTCTGGATTTGGTGCCTTCGGGTACTATTTTCCAGGATTTACTTTGAGAAAACTAGAGTGTTTCAAACAGGCATTCGCCTTGAATACTACAGCATGGAATAATGAAGTAGGACTTTGGTTCTATTTTGTTGGTTATTGAGCCAGAGTAATGGTTAATAGGAGCAGTTGGGGGCATTCGTATT
RJ6862	Netherlands	Ixodes ricinus	2015	Babesia microti	no ambiguous nucleotides	AAATAACAATACAGGGCTTAAAGTCTTGTAATTGGAATGATGGGAATCTAAACCCTTCCCAGAGTATCAATTGGAGGGCAAGTCTGGTGCCAGCAGCCGCGGTAATTCCAGCTCCAATAGCGTATATTAAAGTTGTTGCAGTTAAGAAGCTCGTAGTTGAATTTCTGCCTTGTCATTAATCTCGCTTCCGAGCGTTTTTTTATTGGCTTGGCATCTTCTGGATTTGGTGCCTTCGGGTACTATTTTCCAGGATTTACTTTGAGAAAACTAGAGTGTTTCAAACAGGCATTCGCCTTGAATACTACAGCATGGAATAATGAAGTAGGACTTTGGTTCTATTTTGTTGGTTATTGAGCCAGAGTAATGGTTAATAGGAGCAGTTGGGGGCATTCGTATT
RJ6928	Netherlands	Ixodes ricinus	2015	Babesia microti	no ambiguous nucleotides	AAATAACAATACAGGGCTTAAAGTCTTGTAATTGGAATGATGGGAATCTAAACCCTTCCCAGAGTATCAATTGGAGGGCAAGTCTGGTGCCAGCAGCCGCGGTAATTCCAGCTCCAATAGCGTATATTAAAGTTGTTGCAGTTAAGAAGCTCGTAGTTGAATTTCTGCCTTGTCATTAATCTCGCTTCCGAGCGTTTTTTTATTGGCTTGGCATCTTCTGGATTTGGTGCCTTCGGGTACTATTTTCCAGGATTTACTTTGAGAAAACTAGAGTGTTTCAAACAGGCATTCGCCTTGAATACTACAGCATGGAATAATGAAGTAGGACTTTGGTTCTATTTTGTTGGTTATTGAGCCAGAGTAATGGTTAATAGGAGCAGTTGGGGGCATTCGTATT
RJ6963	Netherlands	Ixodes ricinus	2015	Babesia microti	no ambiguous nucleotides	AAATAACAATACAGGGCTTAAAGTCTTGTAATTGGAATGATGGGAATCTAAACCCTTCCCAGAGTATCAATTGGAGGGCAAGTCTGGTGCCAGCAGCCGCGGTAATTCCAGCTCCAATAGCGTATATTAAAGTTGTTGCAGTTAAGAAGCTCGTAGTTGAATTTCTGCCTTGTCATTAATCTCGCTTCCGAGCGTTTTTTTATTGGCTTGGCATCTTCTGGATTTGGTGCCTTCGGGTACTATTTTCCAGGATTTACTTTGAGAAAACTAGAGTGTTTCAAACAGGCATTCGCCTTGAATACTACAGCATGGAATAATGAAGTAGGACTTTGGTTCTATTTTGTTGGTTATTGAGCCAGAGTAATGGTTAATAGGAGCAGTTGGGGGCATTCGTATT
RJ7052	Netherlands	Ixodes ricinus	2015	Babesia microti	no ambiguous nucleotides	AAATAACAATACAGGGCTTAAAGTCTTGTAATTGGAATGATGGGAATCTAAACCCTTCCCAGAGTATCAATTGGAGGGCAAGTCTGGTGCCAGCAGCCGCGGTAATTCCAGCTCCAATAGCGTATATTAAAGTTGTTGCAGTTAAGAAGCTCGTAGTTGAATTTCTGCCTTGTCATTAATCTCGCTTCCGAGCGTTTTTTTATTGGCTTGGCATCTTCTGGATTTGGTGCCTTCGGGTACTATTTTCCAGGATTTACTTTGAGAAAACTAGAGTGTTTCAAACAGGCATTCGCCTTGAATACTACAGCATGGAATAATGAAGTAGGACTTTGGTTCTATTTTGTTGGTTATTGAGCCAGAGTAATGGTTAATAGGAGCAGTTGGGGGCATTCGTATT
RJm1084	Netherlands	Myodes glareolus	2015	Babesia microti		AAATAACAATACAGGGCTTAAAGTCTTGTAATTGGAATGATGGGAATCTAAACCCTTCCCAGAGTATCAATTGGAGGGCAAGTCTGGTGCCAGCAGCCGCGGTAATTCCAGCTCCAATAGCGTATATTAAAGTTGTTGCAGTTAAGAAGCTCGTAGTTGAATTTCTGCCTTGTCATTAATCTCGCTTCCGAGCGTTTTTTTATTGGCTTGGCATCTTCTGGATTTGGTGCCTTCGGGTACTATTTTCCAGGATTTACTTTGAGAAAACTAGAGTGTTTCAAACAGGCATTCGCCTTGAATACTACAGCATGGAATAATGAAGTAGGACTTTGGTTCTATTTTGTTGGTTATTGAGCCAGAGTAATGGTTAATAGGAGCAGTTGGGGGCATTCGTATT
RJm152	Netherlands	Myodes glareolus	2012	Babesia microti	no ambiguous nucleotides	AAATAACAATACAGGGCTTAAAGTCTTGTAATTGGAATGATGGGAATCTAAACCCTTCCCAGAGTATCAATTGGAGGGCAAGTCTGGTGCCAGCAGCCGCGGTAATTCCAGCTCCAATAGCGTATATTAAAGTTGTTGCAGTTAAGAAGCTCGTAGTTGAATTTCTGCCTTGTCATTAATCTCGCTTCCGAGCGTTTTTTTATTGGCTTGGCATCTTCTGGATTTGGTGCCTTCGGGTACTATTTTCCAGGATTTACTTTGAGAAAACTAGAGTGTTTCAAACAGGCATTCGCCTTGAATACTACAGCATGGAATAATGAAGTAGGACTTTGGTTCTATTTTGTTGGTTATTGAGCCAGAGTAATGGTTAATAGGAGCAGTTGGGGGCATTCGTATT
RJm193	Netherlands	Myodes glareolus	2013	Babesia microti	no ambiguous nucleotides	AAATAACAATACAGGGCTTAAAGTCTTGTAATTGGAATGATGGGAATCTAAACCCTTCCCAGAGTATCAATTGGAGGGCAAGTCTGGTGCCAGCAGCCGCGGTAATTCCAGCTCCAATAGCGTATATTAAAGTTGTTGCAGTTAAGAAGCTCGTAGTTGAATTTCTGCCTTGTCATTAATCTCGCTTCCGAGCGTTTTTTTATTGGCTTGGCATCTTCTGGATTTGGTGCCTTCGGGTACTATTTTCCAGGATTTACTTTGAGAAAACTAGAGTGTTTCAAACAGGCATTCGCCTTGAATACTACAGCATGGAATAATGAAGTAGGACTTTGGTTCTATTTTGTTGGTTATTGAGCCAGAGTAATGGTTAATAGGAGCAGTTGGGGGCATTCGTATT
RJm200	Netherlands	Myodes glareolus	2013	Babesia microti	no ambiguous nucleotides	AAATAACAATACAGGGCTTAAAGTCTTGTAATTGGAATGATGGGAATCTAAACCCTTCCCAGAGTATCAATTGGAGGGCAAGTCTGGTGCCAGCAGCCGCGGTAATTCCAGCTCCAATAGCGTATATTAAAGTTGTTGCAGTTAAGAAGCTCGTAGTTGAATTTCTGCCTTGTCATTAATCTCGCTTCCGAGCGTTTTTTTATTGGCTTGGCATCTTCTGGATTTGGTGCCTTCGGGTACTATTTTCCAGGATTTACTTTGAGAAAACTAGAGTGTTTCAAACAGGCATTCGCCTTGAATACTACAGCATGGAATAATGAAGTAGGACTTTGGTTCTATTTTGTTGGTTATTGAGCCAGAGTAATGGTTAATAGGAGCAGTTGGGGGCATTCGTATT
RJm304	Netherlands	Myodes glareolus	2013	Babesia microti	no ambiguous nucleotides	AAATAACAATACAGGGCTTAAAGTCTTGTAATTGGAATGATGGGAATCTAAACCCTTCCCAGAGTATCAATTGGAGGGCAAGTCTGGTGCCAGCAGCCGCGGTAATTCCAGCTCCAATAGCGTATATTAAAGTTGTTGCAGTTAAGAAGCTCGTAGTTGAATTTCTGCCTTGTCATTAATCTCGCTTCCGAGCGTTTTTTTATTGGCTTGGCATCTTCTGGATTTGGTGCCTTCGGGTACTATTTTCCAGGATTTACTTTGAGAAAACTAGAGTGTTTCAAACAGGCATTCGCCTTGAATACTACAGCATGGAATAATGAAGTAGGACTTTGGTTCTATTTTGTTGGTTATTGAGCCAGAGTAATGGTTAATAGGAGCAGTTGGGGGCATTCGTATT
RJm320	Netherlands	Myodes glareolus	2013	Babesia microti	no ambiguous nucleotides	AAATAACAATACAGGGCTTAAAGTCTTGTAATTGGAATGATGGGAATCTAAACCCTTCCCAGAGTATCAATTGGAGGGCAAGTCTGGTGCCAGCAGCCGCGGTAATTCCAGCTCCAATAGCGTATATTAAAGTTGTTGCAGTTAAGAAGCTCGTAGTTGAATTTCTGCCTTGTCATTAATCTCGCTTCCGAGCGTTTTTTTATTGGCTTGGCATCTTCTGGATTTGGTGCCTTCGGGTACTATTTTCCAGGATTTACTTTGAGAAAACTAGAGTGTTTCAAACAGGCATTCGCCTTGAATACTACAGCATGGAATAATGAAGTAGGACTTTGGTTCTATTTTGTTGGTTATTGAGCCAGAGTAATGGTTAATAGGAGCAGTTGGGGGCATTCGTATT
RJm33	Netherlands	Myodes glareolus	2012	Babesia microti	no ambiguous nucleotides	AAATAACAATACAGGGCTTAAAGTCTTGTAATTGGAATGATGGGAATCTAAACCCTTCCCAGAGTATCAATTGGAGGGCAAGTCTGGTGCCAGCAGCCGCGGTAATTCCAGCTCCAATAGCGTATATTAAAGTTGTTGCAGTTAAGAAGCTCGTAGTTGAATTTCTGCCTTGTCATTAATCTCGCTTCCGAGCGTTTTTTTATTGGCTTGGCATCTTCTGGATTTGGTGCCTTCGGGTACTATTTTCCAGGATTTACTTTGAGAAAACTAGAGTGTTTCAAACAGGCATTCGCCTTGAATACTACAGCATGGAATAATGAAGTAGGACTTTGGTTCTATTTTGTTGGTTATTGAGCCAGAGTAATGGTTAATAGGAGCAGTTGGGGGCATTCGTATT
RJm723	Netherlands	Myodes glareolus	2014	Babesia microti	no ambiguous nucleotides	AAATAACAATACAGGGCTTAAAGTCTTGTAATTGGAATGATGGGAATCTAAACCCTTCCCAGAGTATCAATTGGAGGGCAAGTCTGGTGCCAGCAGCCGCGGTAATTCCAGCTCCAATAGCGTATATTAAAGTTGTTGCAGTTAAGAAGCTCGTAGTTGAATTTCTGCCTTGTCATTAATCTCGCTTCCGAGCGTTTTTTTATTGGCTTGGCATCTTCTGGATTTGGTGCCTTCGGGTACTATTTTCCAGGATTTACTTTGAGAAAACTAGAGTGTTTCAAACAGGCATTCGCCTTGAATACTACAGCATGGAATAATGAAGTAGGACTTTGGTTCTATTTTGTTGGTTATTGAGCCAGAGTAATGGTTAATAGGAGCAGTTGGGGGCATTCGTATT
RJm853	Netherlands	Apodemus sylvaticus	2015	Babesia microti		AAATAACAATACAGGGCTTAAAGTCTTGTAATTGGAATGATGGGAATCTAAACCCTTCCCAGAGTATCAATTGGAGGGCAAGTCTGGTGCCAGCAGCCGCGGTAATTCCAGCTCCAATAGCGTATATTAAAGTTGTTGCAGTTAAGAAGCTCGTAGTTGAATTTCTGCCTTGTCATTAATCTCGCTTCCGAGCGTTTTTTTATTGGCTTGGCATCTTCTGGATTTGGTGCCTTCGGGTACTATTTTCCAGGATTTACTTTGAGAAAACTAGAGTGTTTCAAACAGGCATTCGCCTTGAATACTACAGCATGGAATAATGAAGTAGGACTTTGGTTCTATTTTGTTGGTTATTGAGCCAGAGTAATGGTTAATAGGAGCAGTTGGGGGCATTCGTATT
RJm855	Netherlands	Myodes glareolus	2014	Babesia microti	no ambiguous nucleotides	AAATAACAATACAGGGCTTAAAGTCTTGTAATTGGAATGATGGGAATCTAAACCCTTCCCAGAGTATCAATTGGAGGGCAAGTCTGGTGCCAGCAGCCGCGGTAATTCCAGCTCCAATAGCGTATATTAAAGTTGTTGCAGTTAAGAAGCTCGTAGTTGAATTTCTGCCTTGTCATTAATCTCGCTTCCGAGCGTTTTTTTATTGGCTTGGCATCTTCTGGATTTGGTGCCTTCGGGTACTATTTTCCAGGATTTACTTTGAGAAAACTAGAGTGTTTCAAACAGGCATTCGCCTTGAATACTACAGCATGGAATAATGAAGTAGGACTTTGGTTCTATTTTGTTGGTTATTGAGCCAGAGTAATGGTTAATAGGAGCAGTTGGGGGCATTCGTATT
RJm937	Netherlands	Apodemus sylvaticus	2015	Babesia microti		AAATAACAATACAGGGCTTAAAGTCTTGTAATTGGAATGATGGGAATCTAAACCCTTCCCAGAGTATCAATTGGAGGGCAAGTCTGGTGCCAGCAGCCGCGGTAATTCCAGCTCCAATAGCGTATATTAAAGTTGTTGCAGTTAAGAAGCTCGTAGTTGAATTTCTGCCTTGTCATTAATCTCGCTTCCGAGCGTTTTTTTATTGGCTTGGCATCTTCTGGATTTGGTGCCTTCGGGTACTATTTTCCAGGATTTACTTTGAGAAAACTAGAGTGTTTCAAACAGGCATTCGCCTTGAATACTACAGCATGGAATAATGAAGTAGGACTTTGGTTCTATTTTGTTGGTTATTGAGCCAGAGTAATGGTTAATAGGAGCAGTTGGGGGCATTCGTATT
RJ5484	Netherlands	Ixodes ricinus	2014	Babesia microti	ambiguous nucleotides	AAATAACAATACAGGGCTTAAAGTCTTGTAATTGGAATGAYGGGAATCTAAACCCTTCCCAGAGTATCAATTGGAGGGCAAGTCTGGTGCCAGCAGCCGCGGTAATTCCAGCTCCAATAGCGTATATTAAAGTTGTTGCAGTTAAGAAGCTCGTAGTTGAATTTCTGCCTTGTCATTAATCTCGCTTCCGAGCGTTTTTTTATTGGCTTGGCATCTTCTGGATTTGGTGCCTTCGGGTACTATTTTCCAGGATTTACTTTGAGAAAACTAGAGTGTTTCAAACAGGCATTCGCCTTGAATACTACAGCATGGAATAATGAAGTAGGACTTTGGTTCTATTTTGTTGGTTATTGAGCCAGAGTAATGGTTAATAGGAGCAGTTGGGGGCATTCGTATT
RJm157	Netherlands	Myodes glareolus	2012	Babesia microti	ambiguous nucleotides	AAATAACAATACAGGGCTTAAAGTCTTGTAATTGGAATGATGGGAATCTAAACCCTTCCCAGAGTATCAATTGGAGGGCAAGTCTGGTGCCAGCAGCCGCGGTAATTCCAGCTCCAATAGCGTATATTAAAGTTGTTGCAGTTAAGAAGCTCGTAGTTGAATTTCTGCCTTGTCATTAATCTCGCTTCCGAGCGTTTTTTTATTGGCTTGGCATCTTCTGGATTTGGTGCCTTCGGGTACTATTTTCCAGGATTTACTTTGAGAAAACTAGAGTGTTTCAAACAGGCATTCGCCTTGAATACTACAGCATGGAATAATGAAGTAGGACTTTGGTTCTATTTTGTTGGTTATTGAGCCAGAGTAATGGTTAATAGGARCAGTTGGGGRCATTCGTATT
RJm189	Netherlands	Myodes glareolus	2013	Babesia microti	ambiguous nucleotides	AAATAACAATACAGGGCTTAAAGTMTTGTAATTGGAAYGATGGGAATMTAAACCCTTCCCAGAGTATCAATTGGAGGGCAAGTCTGGTGCCAGCAGCCGCGGTAATTCCAGCTCCAATAGCGTATATTAAAGTTGTTGCAGTTAAGAAGCTCGTAGTTGAATTTCTGCCTTGTCATTAATCTCGCTTCCGAGCGTTTTTTTATTGGCTTGGCATCTTCTGGATTTGGTGCCTTCGGGTACTATTTTCCAGGATTTACTTTGAGAAAACTAGAGTGTTTCAAACAGGCATTCGCCTTGAATACTACAGCATGGAATAATGAAGTAGGACTTTGGTTCTATTTTGTTGGTTATTGAGCCAGAGTAATGGTTAATAGGAGCAGTTGGGGGCATTCGTATT
RJm79	Netherlands	Myodes glareolus	2012	Babesia microti	ambiguous nucleotides	AAATAACAATACAGGGMKTAAAGTYTWGTAAYYGGAATGAKGGGAATYTAANCCCTTCCCAGRGTATCAATTGGAGGSCAAGTMKGGTGCCAGCAGSCGCGGTAATTCCAGCTCCAATAGCGTATATTAAAGTTGTTGCAGTTAAGAAGCTCGTAGTTGAATTTCTGCCTTGTCATTAATCTCGCTTCCGAGCGTTTTTTTATTGGCTTGGCATCTTCTGGATTTGGTGCCTTCGGGTACTATTTTCCAGGATTTACTTTGAGAAAACTAGAGTGTTTCAAACAGGCATTCGCCTTGAATACTACAGCATGGAATAATGAAGTAGGACTTTGGTTCTATTTTGTTGGTTATTGAGCCAGAGTAATGGTTAATAGGAGCAGTTGGGGGCATTCGTATT
RJ6558	Netherlands	Ixodes ricinus	2015	Babesia microti	ambiguous nucleotides	AAATAACAATACAGGGSTTAAAGTCTTGTAATTGGAATGATGGGAATCTAAACCCTTMCCAGAGTATCAATTGGAGGGCAAGTCTGGYGCCAGCAGCCGCGGTAGTTCCAGYTYCAATAGCGTATATTAAAGTTGTTGCAGTTAAGAAGCTCGTAGTTGAATTTCTGCCTTGTCATTAATCTCGCTTCCGAGCGTTTTTTTATTGGCTTGGCATCTTCTGGATTTGGTGCCTTCGGGTACTATTTTCCAGGATTTACTTTGAGAAAACTAGAGTGTTTCAAACAGGCATTCGCCTTGAATACTACAGCATGGAATAATGAAGTAGGACTTTGGTTCTATTTTGTTGGWTATTGAGCCRGAKTAATGGTTAATAKGAGCARTTGGGGGCATTCRWATT
MagnaDeer4A	Netherlands	Capreolus capreolus		Babesia venatorum	no ambiguous nucleotides	AAATAACAATACAGGGCAATTGTCTTGTAATTGGAATGATGGTGACCTAAACCCTCACCAGAGTAACAATTGGAGGGCAAGTCTGGTGCCAGCAGCCGCGGTAATTCCAGCTCCAATAGCGTATATTAAACTTGTTGCAGTTAAAAAGCTCGTAGTTGAATTTCTGCGTTATCGAGTTATTGACTCTTGTCTTTAATCGATTTCGCTTTTGGGATTTATCCCTTTTTACTTTGAGAAAATTAGAGTGTTTCAAGCAGACTTTTGTCTTGAATACTTCAGCATGGAATAATAGAGTAGGACTTTGGTTCTATTTTGTTGGTTTTTGAACCTTAGTAATGGTTAATAGGAACGGTTGGGGGCATTCGTATT
MagnaDeer54F	Netherlands	Capreolus capreolus		Babesia venatorum	no ambiguous nucleotides	AAATAACAATACAGGGCAATTGTCTTGTAATTGGAATGATGGTGACCTAAACCCTCACCAGAGTAACAATTGGAGGGCAAGTCTGGTGCCAGCAGCCGCGGTAATTCCAGCTCCAATAGCGTATATTAAACTTGTTGCAGTTAAAAAGCTCGTAGTTGAATTTCTGCGTTATCGAGTTATTGACTCTTGTCTTTAATCGATTTCGCTTTTGGGATTTATCCCTTTTTACTTTGAGAAAATTAGAGTGTTTCAAGCAGACTTTTGTCTTGAATACTTCAGCATGGAATAATAGAGTAGGACTTTGGTTCTATTTTGTTGGTTTTTGAACCTTAGTAATGGTTAATAGGAACGGTTGGGGGCATTCGTATT
1017AST	Netherlands	Ixodes ricinus	2017	Babesia venatorum	no ambiguous nucleotides	AAATAACAATACAGGGCAATTGTCTTGTAATTGGAATGATGGTGACCTAAACCCTCACCAGAGTAACAATTGGAGGGCAAGTCTGGTGCCAGCAGCCGCGGTAATTCCAGCTCCAATAGCGTATATTAAACTTGTTGCAGTTAAAAAGCTCGTAGTTGAATTTCTGCGTTATCGAGTTATTGACTCTTGTCTTTAATCGATTTCGCTTTTGGGATTTATCCCTTTTTACTTTGAGAAAATTAGAGTGTTTCAAGCAGACTTTTGTCTTGAATACTTCAGCATGGAATAATAGAGTAGGACTTTGGTTCTATTTTGTTGGTTTTTGAACCTTAGTAATGGTTAATAGGAACGGTTGGGGGCATTCGTATT
1088H2	Netherlands	Ixodes ricinus	2017	Babesia venatorum	no ambiguous nucleotides	AAATAACAATACAGGGCAATTGTCTTGTAATTGGAATGATGGTGACCTAAACCCTCACCAGAGTAACAATTGGAGGGCAAGTCTGGTGCCAGCAGCCGCGGTAATTCCAGCTCCAATAGCGTATATTAAACTTGTTGCAGTTAAAAAGCTCGTAGTTGAATTTCTGCGTTATCGAGTTATTGACTCTTGTCTTTAATCGATTTCGCTTTTGGGATTTATCCCTTTTTACTTTGAGAAAATTAGAGTGTTTCAAGCAGACTTTTGTCTTGAATACTTCAGCATGGAATAATAGAGTAGGACTTTGGTTCTATTTTGTTGGTTTTTGAACCTTAGTAATGGTTAATAGGAACGGTTGGGGGCATTCGTATT
111GBU	Netherlands	Ixodes ricinus	2017	Babesia venatorum	no ambiguous nucleotides	AAATAACAATACAGGGCAATTGTCTTGTAATTGGAATGATGGTGACCTAAACCCTCACCAGAGTAACAATTGGAGGGCAAGTCTGGTGCCAGCAGCCGCGGTAATTCCAGCTCCAATAGCGTATATTAAACTTGTTGCAGTTAAAAAGCTCGTAGTTGAATTTCTGCGTTATCGAGTTATTGACTCTTGTCTTTAATCGATTTCGCTTTTGGGATTTATCCCTTTTTACTTTGAGAAAATTAGAGTGTTTCAAGCAGACTTTTGTCTTGAATACTTCAGCATGGAATAATAGAGTAGGACTTTGGTTCTATTTTGTTGGTTTTTGAACCTTAGTAATGGTTAATAGGAACGGTTGGGGGCATTCGTATT
1141EST	Netherlands	Ixodes ricinus	2017	Babesia venatorum	no ambiguous nucleotides	AAATAACAATACAGGGCAATTGTCTTGTAATTGGAATGATGGTGACCTAAACCCTCACCAGAGTAACAATTGGAGGGCAAGTCTGGTGCCAGCAGCCGCGGTAATTCCAGCTCCAATAGCGTATATTAAACTTGTTGCAGTTAAAAAGCTCGTAGTTGAATTTCTGCGTTATCGAGTTATTGACTCTTGTCTTTAATCGATTTCGCTTTTGGGATTTATCCCTTTTTACTTTGAGAAAATTAGAGTGTTTCAAGCAGACTTTTGTCTTGAATACTTCAGCATGGAATAATAGAGTAGGACTTTGGTTCTATTTTGTTGGTTTTTGAACCTTAGTAATGGTTAATAGGAACGGTTGGGGGCATTCGTATT
1160HST	Netherlands	Ixodes ricinus	2017	Babesia venatorum	no ambiguous nucleotides	AAATAACAATACAGGGCAATTGTCTTGTAATTGGAATGATGGTGACCTAAACCCTCACCAGAGTAACAATTGGAGGGCAAGTCTGGTGCCAGCAGCCGCGGTAATTCCAGCTCCAATAGCGTATATTAAACTTGTTGCAGTTAAAAAGCTCGTAGTTGAATTTCTGCGTTATCGAGTTATTGACTCTTGTCTTTAATCGATTTCGCTTTTGGGATTTATCCCTTTTTACTTTGAGAAAATTAGAGTGTTTCAAGCAGACTTTTGTCTTGAATACTTCAGCATGGAATAATAGAGTAGGACTTTGGTTCTATTTTGTTGGTTTTTGAACCTTAGTAATGGTTAATAGGAACGGTTGGGGGCATTCGTATT
1172DST	Netherlands	Ixodes ricinus	2017	Babesia venatorum	no ambiguous nucleotides	AAATAACAATACAGGGCAATTGTCTTGTAATTGGAATGATGGTGACCTAAACCCTCACCAGAGTAACAATTGGAGGGCAAGTCTGGTGCCAGCAGCCGCGGTAATTCCAGCTCCAATAGCGTATATTAAACTTGTTGCAGTTAAAAAGCTCGTAGTTGAATTTCTGCGTTATCGAGTTATTGACTCTTGTCTTTAATCGATTTCGCTTTTGGGATTTATCCCTTTTTACTTTGAGAAAATTAGAGTGTTTCAAGCAGACTTTTGTCTTGAATACTTCAGCATGGAATAATAGAGTAGGACTTTGGTTCTATTTTGTTGGTTTTTGAACCTTAGTAATGGTTAATAGGAACGGTTGGGGGCATTCGTATT
1243H3	Netherlands	Ixodes ricinus	2017	Babesia venatorum	no ambiguous nucleotides	AAATAACAATACAGGGCAATTGTCTTGTAATTGGAATGATGGTGACCTAAACCCTCACCAGAGTAACAATTGGAGGGCAAGTCTGGTGCCAGCAGCCGCGGTAATTCCAGCTCCAATAGCGTATATTAAACTTGTTGCAGTTAAAAAGCTCGTAGTTGAATTTCTGCGTTATCGAGTTATTGACTCTTGTCTTTAATCGATTTCGCTTTTGGGATTTATCCCTTTTTACTTTGAGAAAATTAGAGTGTTTCAAGCAGACTTTTGTCTTGAATACTTCAGCATGGAATAATAGAGTAGGACTTTGGTTCTATTTTGTTGGTTTTTGAACCTTAGTAATGGTTAATAGGAACGGTTGGGGGCATTCGTATT
129ABU	Netherlands	Ixodes ricinus	2017	Babesia venatorum	no ambiguous nucleotides	AAATAACAATACAGGGCAATTGTCTTGTAATTGGAATGATGGTGACCTAAACCCTCACCAGAGTAACAATTGGAGGGCAAGTCTGGTGCCAGCAGCCGCGGTAATTCCAGCTCCAATAGCGTATATTAAACTTGTTGCAGTTAAAAAGCTCGTAGTTGAATTTCTGCGTTATCGAGTTATTGACTCTTGTCTTTAATCGATTTCGCTTTTGGGATTTATCCCTTTTTACTTTGAGAAAATTAGAGTGTTTCAAGCAGACTTTTGTCTTGAATACTTCAGCATGGAATAATAGAGTAGGACTTTGGTTCTATTTTGTTGGTTTTTGAACCTTAGTAATGGTTAATAGGAACGGTTGGGGGCATTCGTATT
1316ST1	Netherlands	Ixodes ricinus	2017	Babesia venatorum	no ambiguous nucleotides	AAATAACAATACAGGGCAATTGTCTTGTAATTGGAATGATGGTGACCTAAACCCTCACCAGAGTAACAATTGGAGGGCAAGTCTGGTGCCAGCAGCCGCGGTAATTCCAGCTCCAATAGCGTATATTAAACTTGTTGCAGTTAAAAAGCTCGTAGTTGAATTTCTGCGTTATCGAGTTATTGACTCTTGTCTTTAATCGATTTCGCTTTTGGGATTTATCCCTTTTTACTTTGAGAAAATTAGAGTGTTTCAAGCAGACTTTTGTCTTGAATACTTCAGCATGGAATAATAGAGTAGGACTTTGGTTCTATTTTGTTGGTTTTTGAACCTTAGTAATGGTTAATAGGAACGGTTGGGGGCATTCGTATT
1381EST	Netherlands	Ixodes ricinus	2017	Babesia venatorum	no ambiguous nucleotides	AAATAACAATACAGGGCAATTGTCTTGTAATTGGAATGATGGTGACCTAAACCCTCACCAGAGTAACAATTGGAGGGCAAGTCTGGTGCCAGCAGCCGCGGTAATTCCAGCTCCAATAGCGTATATTAAACTTGTTGCAGTTAAAAAGCTCGTAGTTGAATTTCTGCGTTATCGAGTTATTGACTCTTGTCTTTAATCGATTTCGCTTTTGGGATTTATCCCTTTTTACTTTGAGAAAATTAGAGTGTTTCAAGCAGACTTTTGTCTTGAATACTTCAGCATGGAATAATAGAGTAGGACTTTGGTTCTATTTTGTTGGTTTTTGAACCTTAGTAATGGTTAATAGGAACGGTTGGGGGCATTCGTATT
1460ST3	Netherlands	Ixodes ricinus	2017	Babesia venatorum	no ambiguous nucleotides	AAATAACAATACAGGGCAATTGTCTTGTAATTGGAATGATGGTGACCTAAACCCTCACCAGAGTAACAATTGGAGGGCAAGTCTGGTGCCAGCAGCCGCGGTAATTCCAGCTCCAATAGCGTATATTAAACTTGTTGCAGTTAAAAAGCTCGTAGTTGAATTTCTGCGTTATCGAGTTATTGACTCTTGTCTTTAATCGATTTCGCTTTTGGGATTTATCCCTTTTTACTTTGAGAAAATTAGAGTGTTTCAAGCAGACTTTTGTCTTGAATACTTCAGCATGGAATAATAGAGTAGGACTTTGGTTCTATTTTGTTGGTTTTTGAACCTTAGTAATGGTTAATAGGAACGGTTGGGGGCATTCGTATT
146BBU	Netherlands	Ixodes ricinus	2017	Babesia venatorum	no ambiguous nucleotides	AAATAACAATACAGGGCAATTGTCTTGTAATTGGAATGATGGTGACCTAAACCCTCACCAGAGTAACAATTGGAGGGCAAGTCTGGTGCCAGCAGCCGCGGTAATTCCAGCTCCAATAGCGTATATTAAACTTGTTGCAGTTAAAAAGCTCGTAGTTGAATTTCTGCGTTATCGAGTTATTGACTCTTGTCTTTAATCGATTTCGCTTTTGGGATTTATCCCTTTTTACTTTGAGAAAATTAGAGTGTTTCAAGCAGACTTTTGTCTTGAATACTTCAGCATGGAATAATAGAGTAGGACTTTGGTTCTATTTTGTTGGTTTTTGAACCTTAGTAATGGTTAATAGGAACGGTTGGGGGCATTCGTATT
1499ST3	Netherlands	Ixodes ricinus	2017	Babesia venatorum	no ambiguous nucleotides	AAATAACAATACAGGGCAATTGTCTTGTAATTGGAATGATGGTGACCTAAACCCTCACCAGAGTAACAATTGGAGGGCAAGTCTGGTGCCAGCAGCCGCGGTAATTCCAGCTCCAATAGCGTATATTAAACTTGTTGCAGTTAAAAAGCTCGTAGTTGAATTTCTGCGTTATCGAGTTATTGACTCTTGTCTTTAATCGATTTCGCTTTTGGGATTTATCCCTTTTTACTTTGAGAAAATTAGAGTGTTTCAAGCAGACTTTTGTCTTGAATACTTCAGCATGGAATAATAGAGTAGGACTTTGGTTCTATTTTGTTGGTTTTTGAACCTTAGTAATGGTTAATAGGAACGGTTGGGGGCATTCGTATT
1520ST3	Netherlands	Ixodes ricinus	2017	Babesia venatorum	no ambiguous nucleotides	AAATAACAATACAGGGCAATTGTCTTGTAATTGGAATGATGGTGACCTAAACCCTCACCAGAGTAACAATTGGAGGGCAAGTCTGGTGCCAGCAGCCGCGGTAATTCCAGCTCCAATAGCGTATATTAAACTTGTTGCAGTTAAAAAGCTCGTAGTTGAATTTCTGCGTTATCGAGTTATTGACTCTTGTCTTTAATCGATTTCGCTTTTGGGATTTATCCCTTTTTACTTTGAGAAAATTAGAGTGTTTCAAGCAGACTTTTGTCTTGAATACTTCAGCATGGAATAATAGAGTAGGACTTTGGTTCTATTTTGTTGGTTTTTGAACCTTAGTAATGGTTAATAGGAACGGTTGGGGGCATTCGTATT
1578BST	Netherlands	Ixodes ricinus	2017	Babesia venatorum	no ambiguous nucleotides	AAATAACAATACAGGGCAATTGTCTTGTAATTGGAATGATGGTGACCTAAACCCTCACCAGAGTAACAATTGGAGGGCAAGTCTGGTGCCAGCAGCCGCGGTAATTCCAGCTCCAATAGCGTATATTAAACTTGTTGCAGTTAAAAAGCTCGTAGTTGAATTTCTGCGTTATCGAGTTATTGACTCTTGTCTTTAATCGATTTCGCTTTTGGGATTTATCCCTTTTTACTTTGAGAAAATTAGAGTGTTTCAAGCAGACTTTTGTCTTGAATACTTCAGCATGGAATAATAGAGTAGGACTTTGGTTCTATTTTGTTGGTTTTTGAACCTTAGTAATGGTTAATAGGAACGGTTGGGGGCATTCGTATT
1593AST	Netherlands	Ixodes ricinus	2017	Babesia venatorum	no ambiguous nucleotides	AAATAACAATACAGGGCAATTGTCTTGTAATTGGAATGATGGTGACCTAAACCCTCACCAGAGTAACAATTGGAGGGCAAGTCTGGTGCCAGCAGCCGCGGTAATTCCAGCTCCAATAGCGTATATTAAACTTGTTGCAGTTAAAAAGCTCGTAGTTGAATTTCTGCGTTATCGAGTTATTGACTCTTGTCTTTAATCGATTTCGCTTTTGGGATTTATCCCTTTTTACTTTGAGAAAATTAGAGTGTTTCAAGCAGACTTTTGTCTTGAATACTTCAGCATGGAATAATAGAGTAGGACTTTGGTTCTATTTTGTTGGTTTTTGAACCTTAGTAATGGTTAATAGGAACGGTTGGGGGCATTCGTATT
1597EST	Netherlands	Ixodes ricinus	2017	Babesia venatorum	no ambiguous nucleotides	AAATAACAATACAGGGCAATTGTCTTGTAATTGGAATGATGGTGACCTAAACCCTCACCAGAGTAACAATTGGAGGGCAAGTCTGGTGCCAGCAGCCGCGGTAATTCCAGCTCCAATAGCGTATATTAAACTTGTTGCAGTTAAAAAGCTCGTAGTTGAATTTCTGCGTTATCGAGTTATTGACTCTTGTCTTTAATCGATTTCGCTTTTGGGATTTATCCCTTTTTACTTTGAGAAAATTAGAGTGTTTCAAGCAGACTTTTGTCTTGAATACTTCAGCATGGAATAATAGAGTAGGACTTTGGTTCTATTTTGTTGGTTTTTGAACCTTAGTAATGGTTAATAGGAACGGTTGGGGGCATTCGTATT
1598FST	Netherlands	Ixodes ricinus	2017	Babesia venatorum	no ambiguous nucleotides	AAATAACAATACAGGGCAATTGTCTTGTAATTGGAATGATGGTGACCTAAACCCTCACCAGAGTAACAATTGGAGGGCAAGTCTGGTGCCAGCAGCCGCGGTAATTCCAGCTCCAATAGCGTATATTAAACTTGTTGCAGTTAAAAAGCTCGTAGTTGAATTTCTGCGTTATCGAGTTATTGACTCTTGTCTTTAATCGATTTCGCTTTTGGGATTTATCCCTTTTTACTTTGAGAAAATTAGAGTGTTTCAAGCAGACTTTTGTCTTGAATACTTCAGCATGGAATAATAGAGTAGGACTTTGGTTCTATTTTGTTGGTTTTTGAACCTTAGTAATGGTTAATAGGAACGGTTGGGGGCATTCGTATT
1601AST	Netherlands	Ixodes ricinus	2017	Babesia venatorum	no ambiguous nucleotides	AAATAACAATACAGGGCAATTGTCTTGTAATTGGAATGATGGTGACCTAAACCCTCACCAGAGTAACAATTGGAGGGCAAGTCTGGTGCCAGCAGCCGCGGTAATTCCAGCTCCAATAGCGTATATTAAACTTGTTGCAGTTAAAAAGCTCGTAGTTGAATTTCTGCGTTATCGAGTTATTGACTCTTGTCTTTAATCGATTTCGCTTTTGGGATTTATCCCTTTTTACTTTGAGAAAATTAGAGTGTTTCAAGCAGACTTTTGTCTTGAATACTTCAGCATGGAATAATAGAGTAGGACTTTGGTTCTATTTTGTTGGTTTTTGAACCTTAGTAATGGTTAATAGGAACGGTTGGGGGCATTCGTATT
1613EST	Netherlands	Ixodes ricinus	2017	Babesia venatorum	no ambiguous nucleotides	AAATAACAATACAGGGCAATTGTCTTGTAATTGGAATGATGGTGACCTAAACCCTCACCAGAGTAACAATTGGAGGGCAAGTCTGGTGCCAGCAGCCGCGGTAATTCCAGCTCCAATAGCGTATATTAAACTTGTTGCAGTTAAAAAGCTCGTAGTTGAATTTCTGCGTTATCGAGTTATTGACTCTTGTCTTTAATCGATTTCGCTTTTGGGATTTATCCCTTTTTACTTTGAGAAAATTAGAGTGTTTCAAGCAGACTTTTGTCTTGAATACTTCAGCATGGAATAATAGAGTAGGACTTTGGTTCTATTTTGTTGGTTTTTGAACCTTAGTAATGGTTAATAGGAACGGTTGGGGGCATTCGTATT
1632HST	Netherlands	Ixodes ricinus	2017	Babesia venatorum	no ambiguous nucleotides	AAATAACAATACAGGGCAATTGTCTTGTAATTGGAATGATGGTGACCTAAACCCTCACCAGAGTAACAATTGGAGGGCAAGTCTGGTGCCAGCAGCCGCGGTAATTCCAGCTCCAATAGCGTATATTAAACTTGTTGCAGTTAAAAAGCTCGTAGTTGAATTTCTGCGTTATCGAGTTATTGACTCTTGTCTTTAATCGATTTCGCTTTTGGGATTTATCCCTTTTTACTTTGAGAAAATTAGAGTGTTTCAAGCAGACTTTTGTCTTGAATACTTCAGCATGGAATAATAGAGTAGGACTTTGGTTCTATTTTGTTGGTTTTTGAACCTTAGTAATGGTTAATAGGAACGGTTGGGGGCATTCGTATT
1689AST	Netherlands	Ixodes ricinus	2017	Babesia venatorum	no ambiguous nucleotides	AAATAACAATACAGGGCAATTGTCTTGTAATTGGAATGATGGTGACCTAAACCCTCACCAGAGTAACAATTGGAGGGCAAGTCTGGTGCCAGCAGCCGCGGTAATTCCAGCTCCAATAGCGTATATTAAACTTGTTGCAGTTAAAAAGCTCGTAGTTGAATTTCTGCGTTATCGAGTTATTGACTCTTGTCTTTAATCGATTTCGCTTTTGGGATTTATCCCTTTTTACTTTGAGAAAATTAGAGTGTTTCAAGCAGACTTTTGTCTTGAATACTTCAGCATGGAATAATAGAGTAGGACTTTGGTTCTATTTTGTTGGTTTTTGAACCTTAGTAATGGTTAATAGGAACGGTTGGGGGCATTCGTATT
1816HST	Netherlands	Ixodes ricinus	2017	Babesia venatorum	no ambiguous nucleotides	AAATAACAATACAGGGCAATTGTCTTGTAATTGGAATGATGGTGACCTAAACCCTCACCAGAGTAACAATTGGAGGGCAAGTCTGGTGCCAGCAGCCGCGGTAATTCCAGCTCCAATAGCGTATATTAAACTTGTTGCAGTTAAAAAGCTCGTAGTTGAATTTCTGCGTTATCGAGTTATTGACTCTTGTCTTTAATCGATTTCGCTTTTGGGATTTATCCCTTTTTACTTTGAGAAAATTAGAGTGTTTCAAGCAGACTTTTGTCTTGAATACTTCAGCATGGAATAATAGAGTAGGACTTTGGTTCTATTTTGTTGGTTTTTGAACCTTAGTAATGGTTAATAGGAACGGTTGGGGGCATTCGTATT
1820DST	Netherlands	Ixodes ricinus	2017	Babesia venatorum	no ambiguous nucleotides	AAATAACAATACAGGGCAATTGTCTTGTAATTGGAATGATGGTGACCTAAACCCTCACCAGAGTAACAATTGGAGGGCAAGTCTGGTGCCAGCAGCCGCGGTAATTCCAGCTCCAATAGCGTATATTAAACTTGTTGCAGTTAAAAAGCTCGTAGTTGAATTTCTGCGTTATCGAGTTATTGACTCTTGTCTTTAATCGATTTCGCTTTTGGGATTTATCCCTTTTTACTTTGAGAAAATTAGAGTGTTTCAAGCAGACTTTTGTCTTGAATACTTCAGCATGGAATAATAGAGTAGGACTTTGGTTCTATTTTGTTGGTTTTTGAACCTTAGTAATGGTTAATAGGAACGGTTGGGGGCATTCGTATT
227CST	Netherlands	Ixodes ricinus	2017	Babesia venatorum	no ambiguous nucleotides	AAATAACAATACAGGGCAATTGTCTTGTAATTGGAATGATGGTGACCTAAACCCTCACCAGAGTAACAATTGGAGGGCAAGTCTGGTGCCAGCAGCCGCGGTAATTCCAGCTCCAATAGCGTATATTAAACTTGTTGCAGTTAAAAAGCTCGTAGTTGAATTTCTGCGTTATCGAGTTATTGACTCTTGTCTTTAATCGATTTCGCTTTTGGGATTTATCCCTTTTTACTTTGAGAAAATTAGAGTGTTTCAAGCAGACTTTTGTCTTGAATACTTCAGCATGGAATAATAGAGTAGGACTTTGGTTCTATTTTGTTGGTTTTTGAACCTTAGTAATGGTTAATAGGAACGGTTGGGGGCATTCGTATT
231B3	Netherlands	Ixodes ricinus	2017	Babesia venatorum	no ambiguous nucleotides	AAATAACAATACAGGGCAATTGTCTTGTAATTGGAATGATGGTGACCTAAACCCTCACCAGAGTAACAATTGGAGGGCAAGTCTGGTGCCAGCAGCCGCGGTAATTCCAGCTCCAATAGCGTATATTAAACTTGTTGCAGTTAAAAAGCTCGTAGTTGAATTTCTGCGTTATCGAGTTATTGACTCTTGTCTTTAATCGATTTCGCTTTTGGGATTTATCCCTTTTTACTTTGAGAAAATTAGAGTGTTTCAAGCAGACTTTTGTCTTGAATACTTCAGCATGGAATAATAGAGTAGGACTTTGGTTCTATTTTGTTGGTTTTTGAACCTTAGTAATGGTTAATAGGAACGGTTGGGGGCATTCGTATT
234BST	Netherlands	Ixodes ricinus	2017	Babesia venatorum	no ambiguous nucleotides	AAATAACAATACAGGGCAATTGTCTTGTAATTGGAATGATGGTGACCTAAACCCTCACCAGAGTAACAATTGGAGGGCAAGTCTGGTGCCAGCAGCCGCGGTAATTCCAGCTCCAATAGCGTATATTAAACTTGTTGCAGTTAAAAAGCTCGTAGTTGAATTTCTGCGTTATCGAGTTATTGACTCTTGTCTTTAATCGATTTCGCTTTTGGGATTTATCCCTTTTTACTTTGAGAAAATTAGAGTGTTTCAAGCAGACTTTTGTCTTGAATACTTCAGCATGGAATAATAGAGTAGGACTTTGGTTCTATTTTGTTGGTTTTTGAACCTTAGTAATGGTTAATAGGAACGGTTGGGGGCATTCGTATT
273AST	Netherlands	Ixodes ricinus	2017	Babesia venatorum	no ambiguous nucleotides	AAATAACAATACAGGGCAATTGTCTTGTAATTGGAATGATGGTGACCTAAACCCTCACCAGAGTAACAATTGGAGGGCAAGTCTGGTGCCAGCAGCCGCGGTAATTCCAGCTCCAATAGCGTATATTAAACTTGTTGCAGTTAAAAAGCTCGTAGTTGAATTTCTGCGTTATCGAGTTATTGACTCTTGTCTTTAATCGATTTCGCTTTTGGGATTTATCCCTTTTTACTTTGAGAAAATTAGAGTGTTTCAAGCAGACTTTTGTCTTGAATACTTCAGCATGGAATAATAGAGTAGGACTTTGGTTCTATTTTGTTGGTTTTTGAACCTTAGTAATGGTTAATAGGAACGGTTGGGGGCATTCGTATT
312HST	Netherlands	Ixodes ricinus	2017	Babesia venatorum	no ambiguous nucleotides	AAATAACAATACAGGGCAATTGTCTTGTAATTGGAATGATGGTGACCTAAACCCTCACCAGAGTAACAATTGGAGGGCAAGTCTGGTGCCAGCAGCCGCGGTAATTCCAGCTCCAATAGCGTATATTAAACTTGTTGCAGTTAAAAAGCTCGTAGTTGAATTTCTGCGTTATCGAGTTATTGACTCTTGTCTTTAATCGATTTCGCTTTTGGGATTTATCCCTTTTTACTTTGAGAAAATTAGAGTGTTTCAAGCAGACTTTTGTCTTGAATACTTCAGCATGGAATAATAGAGTAGGACTTTGGTTCTATTTTGTTGGTTTTTGAACCTTAGTAATGGTTAATAGGAACGGTTGGGGGCATTCGTATT
357EST	Netherlands	Ixodes ricinus	2017	Babesia venatorum	no ambiguous nucleotides	AAATAACAATACAGGGCAATTGTCTTGTAATTGGAATGATGGTGACCTAAACCCTCACCAGAGTAACAATTGGAGGGCAAGTCTGGTGCCAGCAGCCGCGGTAATTCCAGCTCCAATAGCGTATATTAAACTTGTTGCAGTTAAAAAGCTCGTAGTTGAATTTCTGCGTTATCGAGTTATTGACTCTTGTCTTTAATCGATTTCGCTTTTGGGATTTATCCCTTTTTACTTTGAGAAAATTAGAGTGTTTCAAGCAGACTTTTGTCTTGAATACTTCAGCATGGAATAATAGAGTAGGACTTTGGTTCTATTTTGTTGGTTTTTGAACCTTAGTAATGGTTAATAGGAACGGTTGGGGGCATTCGTATT
366B4	Netherlands	Ixodes ricinus	2017	Babesia venatorum	no ambiguous nucleotides	AAATAACAATACAGGGCAATTGTCTTGTAATTGGAATGATGGTGACCTAAACCCTCACCAGAGTAACAATTGGAGGGCAAGTCTGGTGCCAGCAGCCGCGGTAATTCCAGCTCCAATAGCGTATATTAAACTTGTTGCAGTTAAAAAGCTCGTAGTTGAATTTCTGCGTTATCGAGTTATTGACTCTTGTCTTTAATCGATTTCGCTTTTGGGATTTATCCCTTTTTACTTTGAGAAAATTAGAGTGTTTCAAGCAGACTTTTGTCTTGAATACTTCAGCATGGAATAATAGAGTAGGACTTTGGTTCTATTTTGTTGGTTTTTGAACCTTAGTAATGGTTAATAGGAACGGTTGGGGGCATTCGTATT
381EBU	Netherlands	Ixodes ricinus	2017	Babesia venatorum	no ambiguous nucleotides	AAATAACAATACAGGGCAATTGTCTTGTAATTGGAATGATGGTGACCTAAACCCTCACCAGAGTAACAATTGGAGGGCAAGTCTGGTGCCAGCAGCCGCGGTAATTCCAGCTCCAATAGCGTATATTAAACTTGTTGCAGTTAAAAAGCTCGTAGTTGAATTTCTGCGTTATCGAGTTATTGACTCTTGTCTTTAATCGATTTCGCTTTTGGGATTTATCCCTTTTTACTTTGAGAAAATTAGAGTGTTTCAAGCAGACTTTTGTCTTGAATACTTCAGCATGGAATAATAGAGTAGGACTTTGGTTCTATTTTGTTGGTTTTTGAACCTTAGTAATGGTTAATAGGAACGGTTGGGGGCATTCGTATT
383GBU	Netherlands	Ixodes ricinus	2017	Babesia venatorum	no ambiguous nucleotides	AAATAACAATACAGGGCAATTGTCTTGTAATTGGAATGATGGTGACCTAAACCCTCACCAGAGTAACAATTGGAGGGCAAGTCTGGTGCCAGCAGCCGCGGTAATTCCAGCTCCAATAGCGTATATTAAACTTGTTGCAGTTAAAAAGCTCGTAGTTGAATTTCTGCGTTATCGAGTTATTGACTCTTGTCTTTAATCGATTTCGCTTTTGGGATTTATCCCTTTTTACTTTGAGAAAATTAGAGTGTTTCAAGCAGACTTTTGTCTTGAATACTTCAGCATGGAATAATAGAGTAGGACTTTGGTTCTATTTTGTTGGTTTTTGAACCTTAGTAATGGTTAATAGGAACGGTTGGGGGCATTCGTATT
408B4	Netherlands	Ixodes ricinus	2017	Babesia venatorum	no ambiguous nucleotides	AAATAACAATACAGGGCAATTGTCTTGTAATTGGAATGATGGTGACCTAAACCCTCACCAGAGTAACAATTGGAGGGCAAGTCTGGTGCCAGCAGCCGCGGTAATTCCAGCTCCAATAGCGTATATTAAACTTGTTGCAGTTAAAAAGCTCGTAGTTGAATTTCTGCGTTATCGAGTTATTGACTCTTGTCTTTAATCGATTTCGCTTTTGGGATTTATCCCTTTTTACTTTGAGAAAATTAGAGTGTTTCAAGCAGACTTTTGTCTTGAATACTTCAGCATGGAATAATAGAGTAGGACTTTGGTTCTATTTTGTTGGTTTTTGAACCTTAGTAATGGTTAATAGGAACGGTTGGGGGCATTCGTATT
419CAW	Netherlands	Ixodes ricinus	2017	Babesia venatorum	no ambiguous nucleotides	AAATAACAATACAGGGCAATTGTCTTGTAATTGGAATGATGGTGACCTAAACCCTCACCAGAGTAACAATTGGAGGGCAAGTCTGGTGCCAGCAGCCGCGGTAATTCCAGCTCCAATAGCGTATATTAAACTTGTTGCAGTTAAAAAGCTCGTAGTTGAATTTCTGCGTTATCGAGTTATTGACTCTTGTCTTTAATCGATTTCGCTTTTGGGATTTATCCCTTTTTACTTTGAGAAAATTAGAGTGTTTCAAGCAGACTTTTGTCTTGAATACTTCAGCATGGAATAATAGAGTAGGACTTTGGTTCTATTTTGTTGGTTTTTGAACCTTAGTAATGGTTAATAGGAACGGTTGGGGGCATTCGTATT
498BBU	Netherlands	Ixodes ricinus	2017	Babesia venatorum	no ambiguous nucleotides	AAATAACAATACAGGGCAATTGTCTTGTAATTGGAATGATGGTGACCTAAACCCTCACCAGAGTAACAATTGGAGGGCAAGTCTGGTGCCAGCAGCCGCGGTAATTCCAGCTCCAATAGCGTATATTAAACTTGTTGCAGTTAAAAAGCTCGTAGTTGAATTTCTGCGTTATCGAGTTATTGACTCTTGTCTTTAATCGATTTCGCTTTTGGGATTTATCCCTTTTTACTTTGAGAAAATTAGAGTGTTTCAAGCAGACTTTTGTCTTGAATACTTCAGCATGGAATAATAGAGTAGGACTTTGGTTCTATTTTGTTGGTTTTTGAACCTTAGTAATGGTTAATAGGAACGGTTGGGGGCATTCGTATT
512B6	Netherlands	Ixodes ricinus	2017	Babesia venatorum	no ambiguous nucleotides	AAATAACAATACAGGGCAATTGTCTTGTAATTGGAATGATGGTGACCTAAACCCTCACCAGAGTAACAATTGGAGGGCAAGTCTGGTGCCAGCAGCCGCGGTAATTCCAGCTCCAATAGCGTATATTAAACTTGTTGCAGTTAAAAAGCTCGTAGTTGAATTTCTGCGTTATCGAGTTATTGACTCTTGTCTTTAATCGATTTCGCTTTTGGGATTTATCCCTTTTTACTTTGAGAAAATTAGAGTGTTTCAAGCAGACTTTTGTCTTGAATACTTCAGCATGGAATAATAGAGTAGGACTTTGGTTCTATTTTGTTGGTTTTTGAACCTTAGTAATGGTTAATAGGAACGGTTGGGGGCATTCGTATT
519GBU	Netherlands	Ixodes ricinus	2017	Babesia venatorum	no ambiguous nucleotides	AAATAACAATACAGGGCAATTGTCTTGTAATTGGAATGATGGTGACCTAAACCCTCACCAGAGTAACAATTGGAGGGCAAGTCTGGTGCCAGCAGCCGCGGTAATTCCAGCTCCAATAGCGTATATTAAACTTGTTGCAGTTAAAAAGCTCGTAGTTGAATTTCTGCGTTATCGAGTTATTGACTCTTGTCTTTAATCGATTTCGCTTTTGGGATTTATCCCTTTTTACTTTGAGAAAATTAGAGTGTTTCAAGCAGACTTTTGTCTTGAATACTTCAGCATGGAATAATAGAGTAGGACTTTGGTTCTATTTTGTTGGTTTTTGAACCTTAGTAATGGTTAATAGGAACGGTTGGGGGCATTCGTATT
524DST	Netherlands	Ixodes ricinus	2017	Babesia venatorum	no ambiguous nucleotides	AAATAACAATACAGGGCAATTGTCTTGTAATTGGAATGATGGTGACCTAAACCCTCACCAGAGTAACAATTGGAGGGCAAGTCTGGTGCCAGCAGCCGCGGTAATTCCAGCTCCAATAGCGTATATTAAACTTGTTGCAGTTAAAAAGCTCGTAGTTGAATTTCTGCGTTATCGAGTTATTGACTCTTGTCTTTAATCGATTTCGCTTTTGGGATTTATCCCTTTTTACTTTGAGAAAATTAGAGTGTTTCAAGCAGACTTTTGTCTTGAATACTTCAGCATGGAATAATAGAGTAGGACTTTGGTTCTATTTTGTTGGTTTTTGAACCTTAGTAATGGTTAATAGGAACGGTTGGGGGCATTCGTATT
545ABU	Netherlands	Ixodes ricinus	2017	Babesia venatorum	no ambiguous nucleotides	AAATAACAATACAGGGCAATTGTCTTGTAATTGGAATGATGGTGACCTAAACCCTCACCAGAGTAACAATTGGAGGGCAAGTCTGGTGCCAGCAGCCGCGGTAATTCCAGCTCCAATAGCGTATATTAAACTTGTTGCAGTTAAAAAGCTCGTAGTTGAATTTCTGCGTTATCGAGTTATTGACTCTTGTCTTTAATCGATTTCGCTTTTGGGATTTATCCCTTTTTACTTTGAGAAAATTAGAGTGTTTCAAGCAGACTTTTGTCTTGAATACTTCAGCATGGAATAATAGAGTAGGACTTTGGTTCTATTTTGTTGGTTTTTGAACCTTAGTAATGGTTAATAGGAACGGTTGGGGGCATTCGTATT
602BST	Netherlands	Ixodes ricinus	2017	Babesia venatorum	no ambiguous nucleotides	AAATAACAATACAGGGCAATTGTCTTGTAATTGGAATGATGGTGACCTAAACCCTCACCAGAGTAACAATTGGAGGGCAAGTCTGGTGCCAGCAGCCGCGGTAATTCCAGCTCCAATAGCGTATATTAAACTTGTTGCAGTTAAAAAGCTCGTAGTTGAATTTCTGCGTTATCGAGTTATTGACTCTTGTCTTTAATCGATTTCGCTTTTGGGATTTATCCCTTTTTACTTTGAGAAAATTAGAGTGTTTCAAGCAGACTTTTGTCTTGAATACTTCAGCATGGAATAATAGAGTAGGACTTTGGTTCTATTTTGTTGGTTTTTGAACCTTAGTAATGGTTAATAGGAACGGTTGGGGGCATTCGTATT
60DBU	Netherlands	Ixodes ricinus	2017	Babesia venatorum	no ambiguous nucleotides	AAATAACAATACAGGGCAATTGTCTTGTAATTGGAATGATGGTGACCTAAACCCTCACCAGAGTAACAATTGGAGGGCAAGTCTGGTGCCAGCAGCCGCGGTAATTCCAGCTCCAATAGCGTATATTAAACTTGTTGCAGTTAAAAAGCTCGTAGTTGAATTTCTGCGTTATCGAGTTATTGACTCTTGTCTTTAATCGATTTCGCTTTTGGGATTTATCCCTTTTTACTTTGAGAAAATTAGAGTGTTTCAAGCAGACTTTTGTCTTGAATACTTCAGCATGGAATAATAGAGTAGGACTTTGGTTCTATTTTGTTGGTTTTTGAACCTTAGTAATGGTTAATAGGAACGGTTGGGGGCATTCGTATT
616HST	Netherlands	Ixodes ricinus	2017	Babesia venatorum	no ambiguous nucleotides	AAATAACAATACAGGGCAATTGTCTTGTAATTGGAATGATGGTGACCTAAACCCTCACCAGAGTAACAATTGGAGGGCAAGTCTGGTGCCAGCAGCCGCGGTAATTCCAGCTCCAATAGCGTATATTAAACTTGTTGCAGTTAAAAAGCTCGTAGTTGAATTTCTGCGTTATCGAGTTATTGACTCTTGTCTTTAATCGATTTCGCTTTTGGGATTTATCCCTTTTTACTTTGAGAAAATTAGAGTGTTTCAAGCAGACTTTTGTCTTGAATACTTCAGCATGGAATAATAGAGTAGGACTTTGGTTCTATTTTGTTGGTTTTTGAACCTTAGTAATGGTTAATAGGAACGGTTGGGGGCATTCGTATT
623B6	Netherlands	Ixodes ricinus	2017	Babesia venatorum	no ambiguous nucleotides	AAATAACAATACAGGGCAATTGTCTTGTAATTGGAATGATGGTGACCTAAACCCTCACCAGAGTAACAATTGGAGGGCAAGTCTGGTGCCAGCAGCCGCGGTAATTCCAGCTCCAATAGCGTATATTAAACTTGTTGCAGTTAAAAAGCTCGTAGTTGAATTTCTGCGTTATCGAGTTATTGACTCTTGTCTTTAATCGATTTCGCTTTTGGGATTTATCCCTTTTTACTTTGAGAAAATTAGAGTGTTTCAAGCAGACTTTTGTCTTGAATACTTCAGCATGGAATAATAGAGTAGGACTTTGGTTCTATTTTGTTGGTTTTTGAACCTTAGTAATGGTTAATAGGAACGGTTGGGGGCATTCGTATT
636B6	Netherlands	Ixodes ricinus	2017	Babesia venatorum	no ambiguous nucleotides	AAATAACAATACAGGGCAATTGTCTTGTAATTGGAATGATGGTGACCTAAACCCTCACCAGAGTAACAATTGGAGGGCAAGTCTGGTGCCAGCAGCCGCGGTAATTCCAGCTCCAATAGCGTATATTAAACTTGTTGCAGTTAAAAAGCTCGTAGTTGAATTTCTGCGTTATCGAGTTATTGACTCTTGTCTTTAATCGATTTCGCTTTTGGGATTTATCCCTTTTTACTTTGAGAAAATTAGAGTGTTTCAAGCAGACTTTTGTCTTGAATACTTCAGCATGGAATAATAGAGTAGGACTTTGGTTCTATTTTGTTGGTTTTTGAACCTTAGTAATGGTTAATAGGAACGGTTGGGGGCATTCGTATT
787H0	Netherlands	Ixodes ricinus	2017	Babesia venatorum	no ambiguous nucleotides	AAATAACAATACAGGGCAATTGTCTTGTAATTGGAATGATGGTGACCTAAACCCTCACCAGAGTAACAATTGGAGGGCAAGTCTGGTGCCAGCAGCCGCGGTAATTCCAGCTCCAATAGCGTATATTAAACTTGTTGCAGTTAAAAAGCTCGTAGTTGAATTTCTGCGTTATCGAGTTATTGACTCTTGTCTTTAATCGATTTCGCTTTTGGGATTTATCCCTTTTTACTTTGAGAAAATTAGAGTGTTTCAAGCAGACTTTTGTCTTGAATACTTCAGCATGGAATAATAGAGTAGGACTTTGGTTCTATTTTGTTGGTTTTTGAACCTTAGTAATGGTTAATAGGAACGGTTGGGGGCATTCGTATT
840HST	Netherlands	Ixodes ricinus	2017	Babesia venatorum	no ambiguous nucleotides	AAATAACAATACAGGGCAATTGTCTTGTAATTGGAATGATGGTGACCTAAACCCTCACCAGAGTAACAATTGGAGGGCAAGTCTGGTGCCAGCAGCCGCGGTAATTCCAGCTCCAATAGCGTATATTAAACTTGTTGCAGTTAAAAAGCTCGTAGTTGAATTTCTGCGTTATCGAGTTATTGACTCTTGTCTTTAATCGATTTCGCTTTTGGGATTTATCCCTTTTTACTTTGAGAAAATTAGAGTGTTTCAAGCAGACTTTTGTCTTGAATACTTCAGCATGGAATAATAGAGTAGGACTTTGGTTCTATTTTGTTGGTTTTTGAACCTTAGTAATGGTTAATAGGAACGGTTGGGGGCATTCGTATT
843CST	Netherlands	Ixodes ricinus	2017	Babesia venatorum	no ambiguous nucleotides	AAATAACAATACAGGGCAATTGTCTTGTAATTGGAATGATGGTGACCTAAACCCTCACCAGAGTAACAATTGGAGGGCAAGTCTGGTGCCAGCAGCCGCGGTAATTCCAGCTCCAATAGCGTATATTAAACTTGTTGCAGTTAAAAAGCTCGTAGTTGAATTTCTGCGTTATCGAGTTATTGACTCTTGTCTTTAATCGATTTCGCTTTTGGGATTTATCCCTTTTTACTTTGAGAAAATTAGAGTGTTTCAAGCAGACTTTTGTCTTGAATACTTCAGCATGGAATAATAGAGTAGGACTTTGGTTCTATTTTGTTGGTTTTTGAACCTTAGTAATGGTTAATAGGAACGGTTGGGGGCATTCGTATT
928HST	Netherlands	Ixodes ricinus	2017	Babesia venatorum	no ambiguous nucleotides	AAATAACAATACAGGGCAATTGTCTTGTAATTGGAATGATGGTGACCTAAACCCTCACCAGAGTAACAATTGGAGGGCAAGTCTGGTGCCAGCAGCCGCGGTAATTCCAGCTCCAATAGCGTATATTAAACTTGTTGCAGTTAAAAAGCTCGTAGTTGAATTTCTGCGTTATCGAGTTATTGACTCTTGTCTTTAATCGATTTCGCTTTTGGGATTTATCCCTTTTTACTTTGAGAAAATTAGAGTGTTTCAAGCAGACTTTTGTCTTGAATACTTCAGCATGGAATAATAGAGTAGGACTTTGGTTCTATTTTGTTGGTTTTTGAACCTTAGTAATGGTTAATAGGAACGGTTGGGGGCATTCGTATT
950H0	Netherlands	Ixodes ricinus	2017	Babesia venatorum	no ambiguous nucleotides	AAATAACAATACAGGGCAATTGTCTTGTAATTGGAATGATGGTGACCTAAACCCTCACCAGAGTAACAATTGGAGGGCAAGTCTGGTGCCAGCAGCCGCGGTAATTCCAGCTCCAATAGCGTATATTAAACTTGTTGCAGTTAAAAAGCTCGTAGTTGAATTTCTGCGTTATCGAGTTATTGACTCTTGTCTTTAATCGATTTCGCTTTTGGGATTTATCCCTTTTTACTTTGAGAAAATTAGAGTGTTTCAAGCAGACTTTTGTCTTGAATACTTCAGCATGGAATAATAGAGTAGGACTTTGGTTCTATTTTGTTGGTTTTTGAACCTTAGTAATGGTTAATAGGAACGGTTGGGGGCATTCGTATT
95B0	Netherlands	Ixodes ricinus	2017	Babesia venatorum	no ambiguous nucleotides	AAATAACAATACAGGGCAATTGTCTTGTAATTGGAATGATGGTGACCTAAACCCTCACCAGAGTAACAATTGGAGGGCAAGTCTGGTGCCAGCAGCCGCGGTAATTCCAGCTCCAATAGCGTATATTAAACTTGTTGCAGTTAAAAAGCTCGTAGTTGAATTTCTGCGTTATCGAGTTATTGACTCTTGTCTTTAATCGATTTCGCTTTTGGGATTTATCCCTTTTTACTTTGAGAAAATTAGAGTGTTTCAAGCAGACTTTTGTCTTGAATACTTCAGCATGGAATAATAGAGTAGGACTTTGGTTCTATTTTGTTGGTTTTTGAACCTTAGTAATGGTTAATAGGAACGGTTGGGGGCATTCGTATT
964H0	Netherlands	Ixodes ricinus	2017	Babesia venatorum	no ambiguous nucleotides	AAATAACAATACAGGGCAATTGTCTTGTAATTGGAATGATGGTGACCTAAACCCTCACCAGAGTAACAATTGGAGGGCAAGTCTGGTGCCAGCAGCCGCGGTAATTCCAGCTCCAATAGCGTATATTAAACTTGTTGCAGTTAAAAAGCTCGTAGTTGAATTTCTGCGTTATCGAGTTATTGACTCTTGTCTTTAATCGATTTCGCTTTTGGGATTTATCCCTTTTTACTTTGAGAAAATTAGAGTGTTTCAAGCAGACTTTTGTCTTGAATACTTCAGCATGGAATAATAGAGTAGGACTTTGGTTCTATTTTGTTGGTTTTTGAACCTTAGTAATGGTTAATAGGAACGGTTGGGGGCATTCGTATT
9AST	Netherlands	Ixodes ricinus	2017	Babesia venatorum	no ambiguous nucleotides	AAATAACAATACAGGGCAATTGTCTTGTAATTGGAATGATGGTGACCTAAACCCTCACCAGAGTAACAATTGGAGGGCAAGTCTGGTGCCAGCAGCCGCGGTAATTCCAGCTCCAATAGCGTATATTAAACTTGTTGCAGTTAAAAAGCTCGTAGTTGAATTTCTGCGTTATCGAGTTATTGACTCTTGTCTTTAATCGATTTCGCTTTTGGGATTTATCCCTTTTTACTTTGAGAAAATTAGAGTGTTTCAAGCAGACTTTTGTCTTGAATACTTCAGCATGGAATAATAGAGTAGGACTTTGGTTCTATTTTGTTGGTTTTTGAACCTTAGTAATGGTTAATAGGAACGGTTGGGGGCATTCGTATT
BegrazingTeek1499	Netherlands	Ixodes ricinus		Babesia venatorum		AAATAACAATACAGGGCAATTGTCTTGTAATTGGAATGATGGTGACCTAAACCCTCACCAGAGTAACAATTGGAGGGCAAGTCTGGTGCCAGCAGCCGCGGTAATTCCAGCTCCAATAGCGTATATTAAACTTGTTGCAGTTAAAAAGCTCGTAGTTGAATTTCTGCGTTATCGAGTTATTGACTCTTGTCTTTAATCGATTTCGCTTTTGGGATTTATCCCTTTTTACTTTGAGAAAATTAGAGTGTTTCAAGCAGACTTTTGTCTTGAATACTTCAGCATGGAATAATAGAGTAGGACTTTGGTTCTATTTTGTTGGTTTTTGAACCTTAGTAATGGTTAATAGGAACGGTTGGGGGCATTCGTATT
BegrazingTeek2109	Netherlands	Ixodes ricinus		Babesia venatorum		AAATAACAATACAGGGCAATTGTCTTGTAATTGGAATGATGGTGACCTAAACCCTCACCAGAGTAACAATTGGAGGGCAAGTCTGGTGCCAGCAGCCGCGGTAATTCCAGCTCCAATAGCGTATATTAAACTTGTTGCAGTTAAAAAGCTCGTAGTTGAATTTCTGCGTTATCGAGTTATTGACTCTTGTCTTTAATCGATTTCGCTTTTGGGATTTATCCCTTTTTACTTTGAGAAAATTAGAGTGTTTCAAGCAGACTTTTGTCTTGAATACTTCAGCATGGAATAATAGAGTAGGACTTTGGTTCTATTTTGTTGGTTTTTGAACCTTAGTAATGGTTAATAGGAACGGTTGGGGGCATTCGTATT
BegrazingTeek248	Netherlands	Ixodes ricinus		Babesia venatorum		AAATAACAATACAGGGCAATTGTCTTGTAATTGGAATGATGGTGACCTAAACCCTCACCAGAGTAACAATTGGAGGGCAAGTCTGGTGCCAGCAGCCGCGGTAATTCCAGCTCCAATAGCGTATATTAAACTTGTTGCAGTTAAAAAGCTCGTAGTTGAATTTCTGCGTTATCGAGTTATTGACTCTTGTCTTTAATCGATTTCGCTTTTGGGATTTATCCCTTTTTACTTTGAGAAAATTAGAGTGTTTCAAGCAGACTTTTGTCTTGAATACTTCAGCATGGAATAATAGAGTAGGACTTTGGTTCTATTTTGTTGGTTTTTGAACCTTAGTAATGGTTAATAGGAACGGTTGGGGGCATTCGTATT
BegrazingTeek368	Netherlands	Ixodes ricinus		Babesia venatorum		AAATAACAATACAGGGCAATTGTCTTGTAATTGGAATGATGGTGACCTAAACCCTCACCAGAGTAACAATTGGAGGGCAAGTCTGGTGCCAGCAGCCGCGGTAATTCCAGCTCCAATAGCGTATATTAAACTTGTTGCAGTTAAAAAGCTCGTAGTTGAATTTCTGCGTTATCGAGTTATTGACTCTTGTCTTTAATCGATTTCGCTTTTGGGATTTATCCCTTTTTACTTTGAGAAAATTAGAGTGTTTCAAGCAGACTTTTGTCTTGAATACTTCAGCATGGAATAATAGAGTAGGACTTTGGTTCTATTTTGTTGGTTTTTGAACCTTAGTAATGGTTAATAGGAACGGTTGGGGGCATTCGTATT
BegrazingTeek446	Netherlands	Ixodes ricinus		Babesia venatorum		AAATAACAATACAGGGCAATTGTCTTGTAATTGGAATGATGGTGACCTAAACCCTCACCAGAGTAACAATTGGAGGGCAAGTCTGGTGCCAGCAGCCGCGGTAATTCCAGCTCCAATAGCGTATATTAAACTTGTTGCAGTTAAAAAGCTCGTAGTTGAATTTCTGCGTTATCGAGTTATTGACTCTTGTCTTTAATCGATTTCGCTTTTGGGATTTATCCCTTTTTACTTTGAGAAAATTAGAGTGTTTCAAGCAGACTTTTGTCTTGAATACTTCAGCATGGAATAATAGAGTAGGACTTTGGTTCTATTTTGTTGGTTTTTGAACCTTAGTAATGGTTAATAGGAACGGTTGGGGGCATTCGTATT
BegrazingTeek574	Netherlands	Ixodes ricinus		Babesia venatorum		AAATAACAATACAGGGCAATTGTCTTGTAATTGGAATGATGGTGACCTAAACCCTCACCAGAGTAACAATTGGAGGGCAAGTCTGGTGCCAGCAGCCGCGGTAATTCCAGCTCCAATAGCGTATATTAAACTTGTTGCAGTTAAAAAGCTCGTAGTTGAATTTCTGCGTTATCGAGTTATTGACTCTTGTCTTTAATCGATTTCGCTTTTGGGATTTATCCCTTTTTACTTTGAGAAAATTAGAGTGTTTCAAGCAGACTTTTGTCTTGAATACTTCAGCATGGAATAATAGAGTAGGACTTTGGTTCTATTTTGTTGGTTTTTGAACCTTAGTAATGGTTAATAGGAACGGTTGGGGGCATTCGTATT
BegrazingTeek647	Netherlands	Ixodes ricinus		Babesia venatorum		AAATAACAATACAGGGCAATTGTCTTGTAATTGGAATGATGGTGACCTAAACCCTCACCAGAGTAACAATTGGAGGGCAAGTCTGGTGCCAGCAGCCGCGGTAATTCCAGCTCCAATAGCGTATATTAAACTTGTTGCAGTTAAAAAGCTCGTAGTTGAATTTCTGCGTTATCGAGTTATTGACTCTTGTCTTTAATCGATTTCGCTTTTGGGATTTATCCCTTTTTACTTTGAGAAAATTAGAGTGTTTCAAGCAGACTTTTGTCTTGAATACTTCAGCATGGAATAATAGAGTAGGACTTTGGTTCTATTTTGTTGGTTTTTGAACCTTAGTAATGGTTAATAGGAACGGTTGGGGGCATTCGTATT
BelgieWIV1133	Belgium	Ixodes ricinus	2017	Babesia venatorum	no ambiguous nucleotides	AAATAACAATACAGGGCAATTGTCTTGTAATTGGAATGATGGTGACCTAAACCCTCACCAGAGTAACAATTGGAGGGCAAGTCTGGTGCCAGCAGCCGCGGTAATTCCAGCTCCAATAGCGTATATTAAACTTGTTGCAGTTAAAAAGCTCGTAGTTGAATTTCTGCGTTATCGAGTTATTGACTCTTGTCTTTAATCGATTTCGCTTTTGGGATTTATCCCTTTTTACTTTGAGAAAATTAGAGTGTTTCAAGCAGACTTTTGTCTTGAATACTTCAGCATGGAATAATAGAGTAGGACTTTGGTTCTATTTTGTTGGTTTTTGAACCTTAGTAATGGTTAATAGGAACGGTTGGGGGCATTCGTATT
BelgieWIV1167	Belgium	Ixodes ricinus	2017	Babesia venatorum	no ambiguous nucleotides	AAATAACAATACAGGGCAATTGTCTTGTAATTGGAATGATGGTGACCTAAACCCTCACCAGAGTAACAATTGGAGGGCAAGTCTGGTGCCAGCAGCCGCGGTAATTCCAGCTCCAATAGCGTATATTAAACTTGTTGCAGTTAAAAAGCTCGTAGTTGAATTTCTGCGTTATCGAGTTATTGACTCTTGTCTTTAATCGATTTCGCTTTTGGGATTTATCCCTTTTTACTTTGAGAAAATTAGAGTGTTTCAAGCAGACTTTTGTCTTGAATACTTCAGCATGGAATAATAGAGTAGGACTTTGGTTCTATTTTGTTGGTTTTTGAACCTTAGTAATGGTTAATAGGAACGGTTGGGGGCATTCGTATT
BelgieWIV1249	Belgium	Ixodes ricinus	2017	Babesia venatorum	no ambiguous nucleotides	AAATAACAATACAGGGCAATTGTCTTGTAATTGGAATGATGGTGACCTAAACCCTCACCAGAGTAACAATTGGAGGGCAAGTCTGGTGCCAGCAGCCGCGGTAATTCCAGCTCCAATAGCGTATATTAAACTTGTTGCAGTTAAAAAGCTCGTAGTTGAATTTCTGCGTTATCGAGTTATTGACTCTTGTCTTTAATCGATTTCGCTTTTGGGATTTATCCCTTTTTACTTTGAGAAAATTAGAGTGTTTCAAGCAGACTTTTGTCTTGAATACTTCAGCATGGAATAATAGAGTAGGACTTTGGTTCTATTTTGTTGGTTTTTGAACCTTAGTAATGGTTAATAGGAACGGTTGGGGGCATTCGTATT
BelgieWIV135	Belgium	Ixodes ricinus	2017	Babesia venatorum	no ambiguous nucleotides	AAATAACAATACAGGGCAATTGTCTTGTAATTGGAATGATGGTGACCTAAACCCTCACCAGAGTAACAATTGGAGGGCAAGTCTGGTGCCAGCAGCCGCGGTAATTCCAGCTCCAATAGCGTATATTAAACTTGTTGCAGTTAAAAAGCTCGTAGTTGAATTTCTGCGTTATCGAGTTATTGACTCTTGTCTTTAATCGATTTCGCTTTTGGGATTTATCCCTTTTTACTTTGAGAAAATTAGAGTGTTTCAAGCAGACTTTTGTCTTGAATACTTCAGCATGGAATAATAGAGTAGGACTTTGGTTCTATTTTGTTGGTTTTTGAACCTTAGTAATGGTTAATAGGAACGGTTGGGGGCATTCGTATT
BelgieWIV1436	Belgium	Ixodes ricinus	2017	Babesia venatorum	no ambiguous nucleotides	AAATAACAATACAGGGCAATTGTCTTGTAATTGGAATGATGGTGACCTAAACCCTCACCAGAGTAACAATTGGAGGGCAAGTCTGGTGCCAGCAGCCGCGGTAATTCCAGCTCCAATAGCGTATATTAAACTTGTTGCAGTTAAAAAGCTCGTAGTTGAATTTCTGCGTTATCGAGTTATTGACTCTTGTCTTTAATCGATTTCGCTTTTGGGATTTATCCCTTTTTACTTTGAGAAAATTAGAGTGTTTCAAGCAGACTTTTGTCTTGAATACTTCAGCATGGAATAATAGAGTAGGACTTTGGTTCTATTTTGTTGGTTTTTGAACCTTAGTAATGGTTAATAGGAACGGTTGGGGGCATTCGTATT
BelgieWIV1444	Belgium	Ixodes ricinus	2017	Babesia venatorum	no ambiguous nucleotides	AAATAACAATACAGGGCAATTGTCTTGTAATTGGAATGATGGTGACCTAAACCCTCACCAGAGTAACAATTGGAGGGCAAGTCTGGTGCCAGCAGCCGCGGTAATTCCAGCTCCAATAGCGTATATTAAACTTGTTGCAGTTAAAAAGCTCGTAGTTGAATTTCTGCGTTATCGAGTTATTGACTCTTGTCTTTAATCGATTTCGCTTTTGGGATTTATCCCTTTTTACTTTGAGAAAATTAGAGTGTTTCAAGCAGACTTTTGTCTTGAATACTTCAGCATGGAATAATAGAGTAGGACTTTGGTTCTATTTTGTTGGTTTTTGAACCTTAGTAATGGTTAATAGGAACGGTTGGGGGCATTCGTATT
BelgieWIV199	Belgium	Ixodes ricinus	2017	Babesia venatorum	no ambiguous nucleotides	AAATAACAATACAGGGCAATTGTCTTGTAATTGGAATGATGGTGACCTAAACCCTCACCAGAGTAACAATTGGAGGGCAAGTCTGGTGCCAGCAGCCGCGGTAATTCCAGCTCCAATAGCGTATATTAAACTTGTTGCAGTTAAAAAGCTCGTAGTTGAATTTCTGCGTTATCGAGTTATTGACTCTTGTCTTTAATCGATTTCGCTTTTGGGATTTATCCCTTTTTACTTTGAGAAAATTAGAGTGTTTCAAGCAGACTTTTGTCTTGAATACTTCAGCATGGAATAATAGAGTAGGACTTTGGTTCTATTTTGTTGGTTTTTGAACCTTAGTAATGGTTAATAGGAACGGTTGGGGGCATTCGTATT
BelgieWIV391	Belgium	Ixodes ricinus	2017	Babesia venatorum	no ambiguous nucleotides	AAATAACAATACAGGGCAATTGTCTTGTAATTGGAATGATGGTGACCTAAACCCTCACCAGAGTAACAATTGGAGGGCAAGTCTGGTGCCAGCAGCCGCGGTAATTCCAGCTCCAATAGCGTATATTAAACTTGTTGCAGTTAAAAAGCTCGTAGTTGAATTTCTGCGTTATCGAGTTATTGACTCTTGTCTTTAATCGATTTCGCTTTTGGGATTTATCCCTTTTTACTTTGAGAAAATTAGAGTGTTTCAAGCAGACTTTTGTCTTGAATACTTCAGCATGGAATAATAGAGTAGGACTTTGGTTCTATTTTGTTGGTTTTTGAACCTTAGTAATGGTTAATAGGAACGGTTGGGGGCATTCGTATT
BelgieWIV43	Belgium	Ixodes ricinus	2017	Babesia venatorum	no ambiguous nucleotides	AAATAACAATACAGGGCAATTGTCTTGTAATTGGAATGATGGTGACCTAAACCCTCACCAGAGTAACAATTGGAGGGCAAGTCTGGTGCCAGCAGCCGCGGTAATTCCAGCTCCAATAGCGTATATTAAACTTGTTGCAGTTAAAAAGCTCGTAGTTGAATTTCTGCGTTATCGAGTTATTGACTCTTGTCTTTAATCGATTTCGCTTTTGGGATTTATCCCTTTTTACTTTGAGAAAATTAGAGTGTTTCAAGCAGACTTTTGTCTTGAATACTTCAGCATGGAATAATAGAGTAGGACTTTGGTTCTATTTTGTTGGTTTTTGAACCTTAGTAATGGTTAATAGGAACGGTTGGGGGCATTCGTATT
BelgieWIV436	Belgium	Ixodes ricinus	2017	Babesia venatorum	no ambiguous nucleotides	AAATAACAATACAGGGCAATTGTCTTGTAATTGGAATGATGGTGACCTAAACCCTCACCAGAGTAACAATTGGAGGGCAAGTCTGGTGCCAGCAGCCGCGGTAATTCCAGCTCCAATAGCGTATATTAAACTTGTTGCAGTTAAAAAGCTCGTAGTTGAATTTCTGCGTTATCGAGTTATTGACTCTTGTCTTTAATCGATTTCGCTTTTGGGATTTATCCCTTTTTACTTTGAGAAAATTAGAGTGTTTCAAGCAGACTTTTGTCTTGAATACTTCAGCATGGAATAATAGAGTAGGACTTTGGTTCTATTTTGTTGGTTTTTGAACCTTAGTAATGGTTAATAGGAACGGTTGGGGGCATTCGTATT
BelgieWIV455	Belgium	Ixodes ricinus	2017	Babesia venatorum	no ambiguous nucleotides	AAATAACAATACAGGGCAATTGTCTTGTAATTGGAATGATGGTGACCTAAACCCTCACCAGAGTAACAATTGGAGGGCAAGTCTGGTGCCAGCAGCCGCGGTAATTCCAGCTCCAATAGCGTATATTAAACTTGTTGCAGTTAAAAAGCTCGTAGTTGAATTTCTGCGTTATCGAGTTATTGACTCTTGTCTTTAATCGATTTCGCTTTTGGGATTTATCCCTTTTTACTTTGAGAAAATTAGAGTGTTTCAAGCAGACTTTTGTCTTGAATACTTCAGCATGGAATAATAGAGTAGGACTTTGGTTCTATTTTGTTGGTTTTTGAACCTTAGTAATGGTTAATAGGAACGGTTGGGGGCATTCGTATT
BelgieWIV514	Belgium	Ixodes ricinus	2017	Babesia venatorum	no ambiguous nucleotides	AAATAACAATACAGGGCAATTGTCTTGTAATTGGAATGATGGTGACCTAAACCCTCACCAGAGTAACAATTGGAGGGCAAGTCTGGTGCCAGCAGCCGCGGTAATTCCAGCTCCAATAGCGTATATTAAACTTGTTGCAGTTAAAAAGCTCGTAGTTGAATTTCTGCGTTATCGAGTTATTGACTCTTGTCTTTAATCGATTTCGCTTTTGGGATTTATCCCTTTTTACTTTGAGAAAATTAGAGTGTTTCAAGCAGACTTTTGTCTTGAATACTTCAGCATGGAATAATAGAGTAGGACTTTGGTTCTATTTTGTTGGTTTTTGAACCTTAGTAATGGTTAATAGGAACGGTTGGGGGCATTCGTATT
BelgieWIV537	Belgium	Ixodes ricinus	2017	Babesia venatorum	no ambiguous nucleotides	AAATAACAATACAGGGCAATTGTCTTGTAATTGGAATGATGGTGACCTAAACCCTCACCAGAGTAACAATTGGAGGGCAAGTCTGGTGCCAGCAGCCGCGGTAATTCCAGCTCCAATAGCGTATATTAAACTTGTTGCAGTTAAAAAGCTCGTAGTTGAATTTCTGCGTTATCGAGTTATTGACTCTTGTCTTTAATCGATTTCGCTTTTGGGATTTATCCCTTTTTACTTTGAGAAAATTAGAGTGTTTCAAGCAGACTTTTGTCTTGAATACTTCAGCATGGAATAATAGAGTAGGACTTTGGTTCTATTTTGTTGGTTTTTGAACCTTAGTAATGGTTAATAGGAACGGTTGGGGGCATTCGTATT
BelgieWIV861	Belgium	Ixodes ricinus	2017	Babesia venatorum	no ambiguous nucleotides	AAATAACAATACAGGGCAATTGTCTTGTAATTGGAATGATGGTGACCTAAACCCTCACCAGAGTAACAATTGGAGGGCAAGTCTGGTGCCAGCAGCCGCGGTAATTCCAGCTCCAATAGCGTATATTAAACTTGTTGCAGTTAAAAAGCTCGTAGTTGAATTTCTGCGTTATCGAGTTATTGACTCTTGTCTTTAATCGATTTCGCTTTTGGGATTTATCCCTTTTTACTTTGAGAAAATTAGAGTGTTTCAAGCAGACTTTTGTCTTGAATACTTCAGCATGGAATAATAGAGTAGGACTTTGGTTCTATTTTGTTGGTTTTTGAACCTTAGTAATGGTTAATAGGAACGGTTGGGGGCATTCGTATT
BelgieWIV919	Belgium	Ixodes ricinus	2017	Babesia venatorum	no ambiguous nucleotides	AAATAACAATACAGGGCAATTGTCTTGTAATTGGAATGATGGTGACCTAAACCCTCACCAGAGTAACAATTGGAGGGCAAGTCTGGTGCCAGCAGCCGCGGTAATTCCAGCTCCAATAGCGTATATTAAACTTGTTGCAGTTAAAAAGCTCGTAGTTGAATTTCTGCGTTATCGAGTTATTGACTCTTGTCTTTAATCGATTTCGCTTTTGGGATTTATCCCTTTTTACTTTGAGAAAATTAGAGTGTTTCAAGCAGACTTTTGTCTTGAATACTTCAGCATGGAATAATAGAGTAGGACTTTGGTTCTATTTTGTTGGTTTTTGAACCTTAGTAATGGTTAATAGGAACGGTTGGGGGCATTCGTATT
BelgieWIV963	Belgium	Ixodes ricinus	2017	Babesia venatorum	no ambiguous nucleotides	AAATAACAATACAGGGCAATTGTCTTGTAATTGGAATGATGGTGACCTAAACCCTCACCAGAGTAACAATTGGAGGGCAAGTCTGGTGCCAGCAGCCGCGGTAATTCCAGCTCCAATAGCGTATATTAAACTTGTTGCAGTTAAAAAGCTCGTAGTTGAATTTCTGCGTTATCGAGTTATTGACTCTTGTCTTTAATCGATTTCGCTTTTGGGATTTATCCCTTTTTACTTTGAGAAAATTAGAGTGTTTCAAGCAGACTTTTGTCTTGAATACTTCAGCATGGAATAATAGAGTAGGACTTTGGTTCTATTTTGTTGGTTTTTGAACCTTAGTAATGGTTAATAGGAACGGTTGGGGGCATTCGTATT
BelgieWIV978	Belgium	Ixodes ricinus	2017	Babesia venatorum	no ambiguous nucleotides	AAATAACAATACAGGGCAATTGTCTTGTAATTGGAATGATGGTGACCTAAACCCTCACCAGAGTAACAATTGGAGGGCAAGTCTGGTGCCAGCAGCCGCGGTAATTCCAGCTCCAATAGCGTATATTAAACTTGTTGCAGTTAAAAAGCTCGTAGTTGAATTTCTGCGTTATCGAGTTATTGACTCTTGTCTTTAATCGATTTCGCTTTTGGGATTTATCCCTTTTTACTTTGAGAAAATTAGAGTGTTTCAAGCAGACTTTTGTCTTGAATACTTCAGCATGGAATAATAGAGTAGGACTTTGGTTCTATTTTGTTGGTTTTTGAACCTTAGTAATGGTTAATAGGAACGGTTGGGGGCATTCGTATT
BerkensTick27	Netherlands	Ixodes ricinus	2017	Babesia venatorum	no ambiguous nucleotides	AAATAACAATACAGGGCAATTGTCTTGTAATTGGAATGATGGTGACCTAAACCCTCACCAGAGTAACAATTGGAGGGCAAGTCTGGTGCCAGCAGCCGCGGTAATTCCAGCTCCAATAGCGTATATTAAACTTGTTGCAGTTAAAAAGCTCGTAGTTGAATTTCTGCGTTATCGAGTTATTGACTCTTGTCTTTAATCGATTTCGCTTTTGGGATTTATCCCTTTTTACTTTGAGAAAATTAGAGTGTTTCAAGCAGACTTTTGTCTTGAATACTTCAGCATGGAATAATAGAGTAGGACTTTGGTTCTATTTTGTTGGTTTTTGAACCTTAGTAATGGTTAATAGGAACGGTTGGGGGCATTCGTATT
BerkensTick31	Netherlands	Ixodes ricinus	2017	Babesia venatorum	no ambiguous nucleotides	AAATAACAATACAGGGCAATTGTCTTGTAATTGGAATGATGGTGACCTAAACCCTCACCAGAGTAACAATTGGAGGGCAAGTCTGGTGCCAGCAGCCGCGGTAATTCCAGCTCCAATAGCGTATATTAAACTTGTTGCAGTTAAAAAGCTCGTAGTTGAATTTCTGCGTTATCGAGTTATTGACTCTTGTCTTTAATCGATTTCGCTTTTGGGATTTATCCCTTTTTACTTTGAGAAAATTAGAGTGTTTCAAGCAGACTTTTGTCTTGAATACTTCAGCATGGAATAATAGAGTAGGACTTTGGTTCTATTTTGTTGGTTTTTGAACCTTAGTAATGGTTAATAGGAACGGTTGGGGGCATTCGTATT
BerkensTick74	Netherlands	Ixodes ricinus	2017	Babesia venatorum	no ambiguous nucleotides	AAATAACAATACAGGGCAATTGTCTTGTAATTGGAATGATGGTGACCTAAACCCTCACCAGAGTAACAATTGGAGGGCAAGTCTGGTGCCAGCAGCCGCGGTAATTCCAGCTCCAATAGCGTATATTAAACTTGTTGCAGTTAAAAAGCTCGTAGTTGAATTTCTGCGTTATCGAGTTATTGACTCTTGTCTTTAATCGATTTCGCTTTTGGGATTTATCCCTTTTTACTTTGAGAAAATTAGAGTGTTTCAAGCAGACTTTTGTCTTGAATACTTCAGCATGGAATAATAGAGTAGGACTTTGGTTCTATTTTGTTGGTTTTTGAACCTTAGTAATGGTTAATAGGAACGGTTGGGGGCATTCGTATT
RJ1070	Netherlands	Ixodes ricinus	2013	Babesia venatorum	no ambiguous nucleotides	AAATAACAATACAGGGCAATTGTCTTGTAATTGGAATGATGGTGACCTAAACCCTCACCAGAGTAACAATTGGAGGGCAAGTCTGGTGCCAGCAGCCGCGGTAATTCCAGCTCCAATAGCGTATATTAAACTTGTTGCAGTTAAAAAGCTCGTAGTTGAATTTCTGCGTTATCGAGTTATTGACTCTTGTCTTTAATCGATTTCGCTTTTGGGATTTATCCCTTTTTACTTTGAGAAAATTAGAGTGTTTCAAGCAGACTTTTGTCTTGAATACTTCAGCATGGAATAATAGAGTAGGACTTTGGTTCTATTTTGTTGGTTTTTGAACCTTAGTAATGGTTAATAGGAACGGTTGGGGGCATTCGTATT
RJ1084	Netherlands	Ixodes ricinus	2013	Babesia venatorum	no ambiguous nucleotides	AAATAACAATACAGGGCAATTGTCTTGTAATTGGAATGATGGTGACCTAAACCCTCACCAGAGTAACAATTGGAGGGCAAGTCTGGTGCCAGCAGCCGCGGTAATTCCAGCTCCAATAGCGTATATTAAACTTGTTGCAGTTAAAAAGCTCGTAGTTGAATTTCTGCGTTATCGAGTTATTGACTCTTGTCTTTAATCGATTTCGCTTTTGGGATTTATCCCTTTTTACTTTGAGAAAATTAGAGTGTTTCAAGCAGACTTTTGTCTTGAATACTTCAGCATGGAATAATAGAGTAGGACTTTGGTTCTATTTTGTTGGTTTTTGAACCTTAGTAATGGTTAATAGGAACGGTTGGGGGCATTCGTATT
RJ1350	Netherlands	Ixodes ricinus	2013	Babesia venatorum	no ambiguous nucleotides	AAATAACAATACAGGGCAATTGTCTTGTAATTGGAATGATGGTGACCTAAACCCTCACCAGAGTAACAATTGGAGGGCAAGTCTGGTGCCAGCAGCCGCGGTAATTCCAGCTCCAATAGCGTATATTAAACTTGTTGCAGTTAAAAAGCTCGTAGTTGAATTTCTGCGTTATCGAGTTATTGACTCTTGTCTTTAATCGATTTCGCTTTTGGGATTTATCCCTTTTTACTTTGAGAAAATTAGAGTGTTTCAAGCAGACTTTTGTCTTGAATACTTCAGCATGGAATAATAGAGTAGGACTTTGGTTCTATTTTGTTGGTTTTTGAACCTTAGTAATGGTTAATAGGAACGGTTGGGGGCATTCGTATT
RJ1569	Netherlands	Ixodes ricinus	2013	Babesia venatorum	no ambiguous nucleotides	AAATAACAATACAGGGCAATTGTCTTGTAATTGGAATGATGGTGACCTAAACCCTCACCAGAGTAACAATTGGAGGGCAAGTCTGGTGCCAGCAGCCGCGGTAATTCCAGCTCCAATAGCGTATATTAAACTTGTTGCAGTTAAAAAGCTCGTAGTTGAATTTCTGCGTTATCGAGTTATTGACTCTTGTCTTTAATCGATTTCGCTTTTGGGATTTATCCCTTTTTACTTTGAGAAAATTAGAGTGTTTCAAGCAGACTTTTGTCTTGAATACTTCAGCATGGAATAATAGAGTAGGACTTTGGTTCTATTTTGTTGGTTTTTGAACCTTAGTAATGGTTAATAGGAACGGTTGGGGGCATTCGTATT
RJ1692	Netherlands	Ixodes ricinus	2013	Babesia venatorum	no ambiguous nucleotides	AAATAACAATACAGGGCAATTGTCTTGTAATTGGAATGATGGTGACCTAAACCCTCACCAGAGTAACAATTGGAGGGCAAGTCTGGTGCCAGCAGCCGCGGTAATTCCAGCTCCAATAGCGTATATTAAACTTGTTGCAGTTAAAAAGCTCGTAGTTGAATTTCTGCGTTATCGAGTTATTGACTCTTGTCTTTAATCGATTTCGCTTTTGGGATTTATCCCTTTTTACTTTGAGAAAATTAGAGTGTTTCAAGCAGACTTTTGTCTTGAATACTTCAGCATGGAATAATAGAGTAGGACTTTGGTTCTATTTTGTTGGTTTTTGAACCTTAGTAATGGTTAATAGGAACGGTTGGGGGCATTCGTATT
RJ1947	Netherlands	Ixodes ricinus	2013	Babesia venatorum	no ambiguous nucleotides	AAATAACAATACAGGGCAATTGTCTTGTAATTGGAATGATGGTGACCTAAACCCTCACCAGAGTAACAATTGGAGGGCAAGTCTGGTGCCAGCAGCCGCGGTAATTCCAGCTCCAATAGCGTATATTAAACTTGTTGCAGTTAAAAAGCTCGTAGTTGAATTTCTGCGTTATCGAGTTATTGACTCTTGTCTTTAATCGATTTCGCTTTTGGGATTTATCCCTTTTTACTTTGAGAAAATTAGAGTGTTTCAAGCAGACTTTTGTCTTGAATACTTCAGCATGGAATAATAGAGTAGGACTTTGGTTCTATTTTGTTGGTTTTTGAACCTTAGTAATGGTTAATAGGAACGGTTGGGGGCATTCGTATT
RJ2159	Netherlands	Ixodes ricinus	2013	Babesia venatorum	no ambiguous nucleotides	AAATAACAATACAGGGCAATTGTCTTGTAATTGGAATGATGGTGACCTAAACCCTCACCAGAGTAACAATTGGAGGGCAAGTCTGGTGCCAGCAGCCGCGGTAATTCCAGCTCCAATAGCGTATATTAAACTTGTTGCAGTTAAAAAGCTCGTAGTTGAATTTCTGCGTTATCGAGTTATTGACTCTTGTCTTTAATCGATTTCGCTTTTGGGATTTATCCCTTTTTACTTTGAGAAAATTAGAGTGTTTCAAGCAGACTTTTGTCTTGAATACTTCAGCATGGAATAATAGAGTAGGACTTTGGTTCTATTTTGTTGGTTTTTGAACCTTAGTAATGGTTAATAGGAACGGTTGGGGGCATTCGTATT
RJ2211	Netherlands	Ixodes ricinus	2013	Babesia venatorum	no ambiguous nucleotides	AAATAACAATACAGGGCAATTGTCTTGTAATTGGAATGATGGTGACCTAAACCCTCACCAGAGTAACAATTGGAGGGCAAGTCTGGTGCCAGCAGCCGCGGTAATTCCAGCTCCAATAGCGTATATTAAACTTGTTGCAGTTAAAAAGCTCGTAGTTGAATTTCTGCGTTATCGAGTTATTGACTCTTGTCTTTAATCGATTTCGCTTTTGGGATTTATCCCTTTTTACTTTGAGAAAATTAGAGTGTTTCAAGCAGACTTTTGTCTTGAATACTTCAGCATGGAATAATAGAGTAGGACTTTGGTTCTATTTTGTTGGTTTTTGAACCTTAGTAATGGTTAATAGGAACGGTTGGGGGCATTCGTATT
RJ2343	Netherlands	Ixodes ricinus	2013	Babesia venatorum	no ambiguous nucleotides	AAATAACAATACAGGGCAATTGTCTTGTAATTGGAATGATGGTGACCTAAACCCTCACCAGAGTAACAATTGGAGGGCAAGTCTGGTGCCAGCAGCCGCGGTAATTCCAGCTCCAATAGCGTATATTAAACTTGTTGCAGTTAAAAAGCTCGTAGTTGAATTTCTGCGTTATCGAGTTATTGACTCTTGTCTTTAATCGATTTCGCTTTTGGGATTTATCCCTTTTTACTTTGAGAAAATTAGAGTGTTTCAAGCAGACTTTTGTCTTGAATACTTCAGCATGGAATAATAGAGTAGGACTTTGGTTCTATTTTGTTGGTTTTTGAACCTTAGTAATGGTTAATAGGAACGGTTGGGGGCATTCGTATT
RJ2351	Netherlands	Ixodes ricinus	2013	Babesia venatorum	no ambiguous nucleotides	AAATAACAATACAGGGCAATTGTCTTGTAATTGGAATGATGGTGACCTAAACCCTCACCAGAGTAACAATTGGAGGGCAAGTCTGGTGCCAGCAGCCGCGGTAATTCCAGCTCCAATAGCGTATATTAAACTTGTTGCAGTTAAAAAGCTCGTAGTTGAATTTCTGCGTTATCGAGTTATTGACTCTTGTCTTTAATCGATTTCGCTTTTGGGATTTATCCCTTTTTACTTTGAGAAAATTAGAGTGTTTCAAGCAGACTTTTGTCTTGAATACTTCAGCATGGAATAATAGAGTAGGACTTTGGTTCTATTTTGTTGGTTTTTGAACCTTAGTAATGGTTAATAGGAACGGTTGGGGGCATTCGTATT
RJ2416	Netherlands	Ixodes ricinus	2013	Babesia venatorum	no ambiguous nucleotides	AAATAACAATACAGGGCAATTGTCTTGTAATTGGAATGATGGTGACCTAAACCCTCACCAGAGTAACAATTGGAGGGCAAGTCTGGTGCCAGCAGCCGCGGTAATTCCAGCTCCAATAGCGTATATTAAACTTGTTGCAGTTAAAAAGCTCGTAGTTGAATTTCTGCGTTATCGAGTTATTGACTCTTGTCTTTAATCGATTTCGCTTTTGGGATTTATCCCTTTTTACTTTGAGAAAATTAGAGTGTTTCAAGCAGACTTTTGTCTTGAATACTTCAGCATGGAATAATAGAGTAGGACTTTGGTTCTATTTTGTTGGTTTTTGAACCTTAGTAATGGTTAATAGGAACGGTTGGGGGCATTCGTATT
RJ2537	Netherlands	Ixodes ricinus	2013	Babesia venatorum	no ambiguous nucleotides	AAATAACAATACAGGGCAATTGTCTTGTAATTGGAATGATGGTGACCTAAACCCTCACCAGAGTAACAATTGGAGGGCAAGTCTGGTGCCAGCAGCCGCGGTAATTCCAGCTCCAATAGCGTATATTAAACTTGTTGCAGTTAAAAAGCTCGTAGTTGAATTTCTGCGTTATCGAGTTATTGACTCTTGTCTTTAATCGATTTCGCTTTTGGGATTTATCCCTTTTTACTTTGAGAAAATTAGAGTGTTTCAAGCAGACTTTTGTCTTGAATACTTCAGCATGGAATAATAGAGTAGGACTTTGGTTCTATTTTGTTGGTTTTTGAACCTTAGTAATGGTTAATAGGAACGGTTGGGGGCATTCGTATT
RJ2597	Netherlands	Ixodes ricinus	2013	Babesia venatorum	no ambiguous nucleotides	AAATAACAATACAGGGCAATTGTCTTGTAATTGGAATGATGGTGACCTAAACCCTCACCAGAGTAACAATTGGAGGGCAAGTCTGGTGCCAGCAGCCGCGGTAATTCCAGCTCCAATAGCGTATATTAAACTTGTTGCAGTTAAAAAGCTCGTAGTTGAATTTCTGCGTTATCGAGTTATTGACTCTTGTCTTTAATCGATTTCGCTTTTGGGATTTATCCCTTTTTACTTTGAGAAAATTAGAGTGTTTCAAGCAGACTTTTGTCTTGAATACTTCAGCATGGAATAATAGAGTAGGACTTTGGTTCTATTTTGTTGGTTTTTGAACCTTAGTAATGGTTAATAGGAACGGTTGGGGGCATTCGTATT
RJ3181	Netherlands	Ixodes ricinus	2013	Babesia venatorum	no ambiguous nucleotides	AAATAACAATACAGGGCAATTGTCTTGTAATTGGAATGATGGTGACCTAAACCCTCACCAGAGTAACAATTGGAGGGCAAGTCTGGTGCCAGCAGCCGCGGTAATTCCAGCTCCAATAGCGTATATTAAACTTGTTGCAGTTAAAAAGCTCGTAGTTGAATTTCTGCGTTATCGAGTTATTGACTCTTGTCTTTAATCGATTTCGCTTTTGGGATTTATCCCTTTTTACTTTGAGAAAATTAGAGTGTTTCAAGCAGACTTTTGTCTTGAATACTTCAGCATGGAATAATAGAGTAGGACTTTGGTTCTATTTTGTTGGTTTTTGAACCTTAGTAATGGTTAATAGGAACGGTTGGGGGCATTCGTATT
RJ3184	Netherlands	Ixodes ricinus	2013	Babesia venatorum	no ambiguous nucleotides	AAATAACAATACAGGGCAATTGTCTTGTAATTGGAATGATGGTGACCTAAACCCTCACCAGAGTAACAATTGGAGGGCAAGTCTGGTGCCAGCAGCCGCGGTAATTCCAGCTCCAATAGCGTATATTAAACTTGTTGCAGTTAAAAAGCTCGTAGTTGAATTTCTGCGTTATCGAGTTATTGACTCTTGTCTTTAATCGATTTCGCTTTTGGGATTTATCCCTTTTTACTTTGAGAAAATTAGAGTGTTTCAAGCAGACTTTTGTCTTGAATACTTCAGCATGGAATAATAGAGTAGGACTTTGGTTCTATTTTGTTGGTTTTTGAACCTTAGTAATGGTTAATAGGAACGGTTGGGGGCATTCGTATT
RJ3579	Netherlands	Ixodes ricinus	2014	Babesia venatorum	no ambiguous nucleotides	AAATAACAATACAGGGCAATTGTCTTGTAATTGGAATGATGGTGACCTAAACCCTCACCAGAGTAACAATTGGAGGGCAAGTCTGGTGCCAGCAGCCGCGGTAATTCCAGCTCCAATAGCGTATATTAAACTTGTTGCAGTTAAAAAGCTCGTAGTTGAATTTCTGCGTTATCGAGTTATTGACTCTTGTCTTTAATCGATTTCGCTTTTGGGATTTATCCCTTTTTACTTTGAGAAAATTAGAGTGTTTCAAGCAGACTTTTGTCTTGAATACTTCAGCATGGAATAATAGAGTAGGACTTTGGTTCTATTTTGTTGGTTTTTGAACCTTAGTAATGGTTAATAGGAACGGTTGGGGGCATTCGTATT
RJ3760	Netherlands	Ixodes ricinus	2014	Babesia venatorum	no ambiguous nucleotides	AAATAACAATACAGGGCAATTGTCTTGTAATTGGAATGATGGTGACCTAAACCCTCACCAGAGTAACAATTGGAGGGCAAGTCTGGTGCCAGCAGCCGCGGTAATTCCAGCTCCAATAGCGTATATTAAACTTGTTGCAGTTAAAAAGCTCGTAGTTGAATTTCTGCGTTATCGAGTTATTGACTCTTGTCTTTAATCGATTTCGCTTTTGGGATTTATCCCTTTTTACTTTGAGAAAATTAGAGTGTTTCAAGCAGACTTTTGTCTTGAATACTTCAGCATGGAATAATAGAGTAGGACTTTGGTTCTATTTTGTTGGTTTTTGAACCTTAGTAATGGTTAATAGGAACGGTTGGGGGCATTCGTATT
RJ3788	Netherlands	Ixodes ricinus	2014	Babesia venatorum	no ambiguous nucleotides	AAATAACAATACAGGGCAATTGTCTTGTAATTGGAATGATGGTGACCTAAACCCTCACCAGAGTAACAATTGGAGGGCAAGTCTGGTGCCAGCAGCCGCGGTAATTCCAGCTCCAATAGCGTATATTAAACTTGTTGCAGTTAAAAAGCTCGTAGTTGAATTTCTGCGTTATCGAGTTATTGACTCTTGTCTTTAATCGATTTCGCTTTTGGGATTTATCCCTTTTTACTTTGAGAAAATTAGAGTGTTTCAAGCAGACTTTTGTCTTGAATACTTCAGCATGGAATAATAGAGTAGGACTTTGGTTCTATTTTGTTGGTTTTTGAACCTTAGTAATGGTTAATAGGAACGGTTGGGGGCATTCGTATT
RJ3815	Netherlands	Ixodes ricinus	2014	Babesia venatorum	no ambiguous nucleotides	AAATAACAATACAGGGCAATTGTCTTGTAATTGGAATGATGGTGACCTAAACCCTCACCAGAGTAACAATTGGAGGGCAAGTCTGGTGCCAGCAGCCGCGGTAATTCCAGCTCCAATAGCGTATATTAAACTTGTTGCAGTTAAAAAGCTCGTAGTTGAATTTCTGCGTTATCGAGTTATTGACTCTTGTCTTTAATCGATTTCGCTTTTGGGATTTATCCCTTTTTACTTTGAGAAAATTAGAGTGTTTCAAGCAGACTTTTGTCTTGAATACTTCAGCATGGAATAATAGAGTAGGACTTTGGTTCTATTTTGTTGGTTTTTGAACCTTAGTAATGGTTAATAGGAACGGTTGGGGGCATTCGTATT
RJ4179	Netherlands	Ixodes ricinus	2014	Babesia venatorum	no ambiguous nucleotides	AAATAACAATACAGGGCAATTGTCTTGTAATTGGAATGATGGTGACCTAAACCCTCACCAGAGTAACAATTGGAGGGCAAGTCTGGTGCCAGCAGCCGCGGTAATTCCAGCTCCAATAGCGTATATTAAACTTGTTGCAGTTAAAAAGCTCGTAGTTGAATTTCTGCGTTATCGAGTTATTGACTCTTGTCTTTAATCGATTTCGCTTTTGGGATTTATCCCTTTTTACTTTGAGAAAATTAGAGTGTTTCAAGCAGACTTTTGTCTTGAATACTTCAGCATGGAATAATAGAGTAGGACTTTGGTTCTATTTTGTTGGTTTTTGAACCTTAGTAATGGTTAATAGGAACGGTTGGGGGCATTCGTATT
RJ4184	Netherlands	Ixodes ricinus	2014	Babesia venatorum	no ambiguous nucleotides	AAATAACAATACAGGGCAATTGTCTTGTAATTGGAATGATGGTGACCTAAACCCTCACCAGAGTAACAATTGGAGGGCAAGTCTGGTGCCAGCAGCCGCGGTAATTCCAGCTCCAATAGCGTATATTAAACTTGTTGCAGTTAAAAAGCTCGTAGTTGAATTTCTGCGTTATCGAGTTATTGACTCTTGTCTTTAATCGATTTCGCTTTTGGGATTTATCCCTTTTTACTTTGAGAAAATTAGAGTGTTTCAAGCAGACTTTTGTCTTGAATACTTCAGCATGGAATAATAGAGTAGGACTTTGGTTCTATTTTGTTGGTTTTTGAACCTTAGTAATGGTTAATAGGAACGGTTGGGGGCATTCGTATT
RJ4192	Netherlands	Ixodes ricinus	2014	Babesia venatorum	no ambiguous nucleotides	AAATAACAATACAGGGCAATTGTCTTGTAATTGGAATGATGGTGACCTAAACCCTCACCAGAGTAACAATTGGAGGGCAAGTCTGGTGCCAGCAGCCGCGGTAATTCCAGCTCCAATAGCGTATATTAAACTTGTTGCAGTTAAAAAGCTCGTAGTTGAATTTCTGCGTTATCGAGTTATTGACTCTTGTCTTTAATCGATTTCGCTTTTGGGATTTATCCCTTTTTACTTTGAGAAAATTAGAGTGTTTCAAGCAGACTTTTGTCTTGAATACTTCAGCATGGAATAATAGAGTAGGACTTTGGTTCTATTTTGTTGGTTTTTGAACCTTAGTAATGGTTAATAGGAACGGTTGGGGGCATTCGTATT
RJ4500	Netherlands	Ixodes ricinus	2014	Babesia venatorum	no ambiguous nucleotides	AAATAACAATACAGGGCAATTGTCTTGTAATTGGAATGATGGTGACCTAAACCCTCACCAGAGTAACAATTGGAGGGCAAGTCTGGTGCCAGCAGCCGCGGTAATTCCAGCTCCAATAGCGTATATTAAACTTGTTGCAGTTAAAAAGCTCGTAGTTGAATTTCTGCGTTATCGAGTTATTGACTCTTGTCTTTAATCGATTTCGCTTTTGGGATTTATCCCTTTTTACTTTGAGAAAATTAGAGTGTTTCAAGCAGACTTTTGTCTTGAATACTTCAGCATGGAATAATAGAGTAGGACTTTGGTTCTATTTTGTTGGTTTTTGAACCTTAGTAATGGTTAATAGGAACGGTTGGGGGCATTCGTATT
RJ4540	Netherlands	Ixodes ricinus	2014	Babesia venatorum	no ambiguous nucleotides	AAATAACAATACAGGGCAATTGTCTTGTAATTGGAATGATGGTGACCTAAACCCTCACCAGAGTAACAATTGGAGGGCAAGTCTGGTGCCAGCAGCCGCGGTAATTCCAGCTCCAATAGCGTATATTAAACTTGTTGCAGTTAAAAAGCTCGTAGTTGAATTTCTGCGTTATCGAGTTATTGACTCTTGTCTTTAATCGATTTCGCTTTTGGGATTTATCCCTTTTTACTTTGAGAAAATTAGAGTGTTTCAAGCAGACTTTTGTCTTGAATACTTCAGCATGGAATAATAGAGTAGGACTTTGGTTCTATTTTGTTGGTTTTTGAACCTTAGTAATGGTTAATAGGAACGGTTGGGGGCATTCGTATT
RJ457	Netherlands	Ixodes ricinus	2012	Babesia venatorum	no ambiguous nucleotides	AAATAACAATACAGGGCAATTGTCTTGTAATTGGAATGATGGTGACCTAAACCCTCACCAGAGTAACAATTGGAGGGCAAGTCTGGTGCCAGCAGCCGCGGTAATTCCAGCTCCAATAGCGTATATTAAACTTGTTGCAGTTAAAAAGCTCGTAGTTGAATTTCTGCGTTATCGAGTTATTGACTCTTGTCTTTAATCGATTTCGCTTTTGGGATTTATCCCTTTTTACTTTGAGAAAATTAGAGTGTTTCAAGCAGACTTTTGTCTTGAATACTTCAGCATGGAATAATAGAGTAGGACTTTGGTTCTATTTTGTTGGTTTTTGAACCTTAGTAATGGTTAATAGGAACGGTTGGGGGCATTCGTATT
RJ4729	Netherlands	Ixodes ricinus	2014	Babesia venatorum	no ambiguous nucleotides	AAATAACAATACAGGGCAATTGTCTTGTAATTGGAATGATGGTGACCTAAACCCTCACCAGAGTAACAATTGGAGGGCAAGTCTGGTGCCAGCAGCCGCGGTAATTCCAGCTCCAATAGCGTATATTAAACTTGTTGCAGTTAAAAAGCTCGTAGTTGAATTTCTGCGTTATCGAGTTATTGACTCTTGTCTTTAATCGATTTCGCTTTTGGGATTTATCCCTTTTTACTTTGAGAAAATTAGAGTGTTTCAAGCAGACTTTTGTCTTGAATACTTCAGCATGGAATAATAGAGTAGGACTTTGGTTCTATTTTGTTGGTTTTTGAACCTTAGTAATGGTTAATAGGAACGGTTGGGGGCATTCGTATT
RJ4782	Netherlands	Ixodes ricinus	2014	Babesia venatorum	no ambiguous nucleotides	AAATAACAATACAGGGCAATTGTCTTGTAATTGGAATGATGGTGACCTAAACCCTCACCAGAGTAACAATTGGAGGGCAAGTCTGGTGCCAGCAGCCGCGGTAATTCCAGCTCCAATAGCGTATATTAAACTTGTTGCAGTTAAAAAGCTCGTAGTTGAATTTCTGCGTTATCGAGTTATTGACTCTTGTCTTTAATCGATTTCGCTTTTGGGATTTATCCCTTTTTACTTTGAGAAAATTAGAGTGTTTCAAGCAGACTTTTGTCTTGAATACTTCAGCATGGAATAATAGAGTAGGACTTTGGTTCTATTTTGTTGGTTTTTGAACCTTAGTAATGGTTAATAGGAACGGTTGGGGGCATTCGTATT
RJ5022	Netherlands	Ixodes ricinus	2014	Babesia venatorum	no ambiguous nucleotides	AAATAACAATACAGGGCAATTGTCTTGTAATTGGAATGATGGTGACCTAAACCCTCACCAGAGTAACAATTGGAGGGCAAGTCTGGTGCCAGCAGCCGCGGTAATTCCAGCTCCAATAGCGTATATTAAACTTGTTGCAGTTAAAAAGCTCGTAGTTGAATTTCTGCGTTATCGAGTTATTGACTCTTGTCTTTAATCGATTTCGCTTTTGGGATTTATCCCTTTTTACTTTGAGAAAATTAGAGTGTTTCAAGCAGACTTTTGTCTTGAATACTTCAGCATGGAATAATAGAGTAGGACTTTGGTTCTATTTTGTTGGTTTTTGAACCTTAGTAATGGTTAATAGGAACGGTTGGGGGCATTCGTATT
RJ5135	Netherlands	Ixodes ricinus	2014	Babesia venatorum	no ambiguous nucleotides	AAATAACAATACAGGGCAATTGTCTTGTAATTGGAATGATGGTGACCTAAACCCTCACCAGAGTAACAATTGGAGGGCAAGTCTGGTGCCAGCAGCCGCGGTAATTCCAGCTCCAATAGCGTATATTAAACTTGTTGCAGTTAAAAAGCTCGTAGTTGAATTTCTGCGTTATCGAGTTATTGACTCTTGTCTTTAATCGATTTCGCTTTTGGGATTTATCCCTTTTTACTTTGAGAAAATTAGAGTGTTTCAAGCAGACTTTTGTCTTGAATACTTCAGCATGGAATAATAGAGTAGGACTTTGGTTCTATTTTGTTGGTTTTTGAACCTTAGTAATGGTTAATAGGAACGGTTGGGGGCATTCGTATT
RJ5247	Netherlands	Ixodes ricinus	2014	Babesia venatorum	no ambiguous nucleotides	AAATAACAATACAGGGCAATTGTCTTGTAATTGGAATGATGGTGACCTAAACCCTCACCAGAGTAACAATTGGAGGGCAAGTCTGGTGCCAGCAGCCGCGGTAATTCCAGCTCCAATAGCGTATATTAAACTTGTTGCAGTTAAAAAGCTCGTAGTTGAATTTCTGCGTTATCGAGTTATTGACTCTTGTCTTTAATCGATTTCGCTTTTGGGATTTATCCCTTTTTACTTTGAGAAAATTAGAGTGTTTCAAGCAGACTTTTGTCTTGAATACTTCAGCATGGAATAATAGAGTAGGACTTTGGTTCTATTTTGTTGGTTTTTGAACCTTAGTAATGGTTAATAGGAACGGTTGGGGGCATTCGTATT
RJ5308	Netherlands	Ixodes ricinus	2014	Babesia venatorum	no ambiguous nucleotides	AAATAACAATACAGGGCAATTGTCTTGTAATTGGAATGATGGTGACCTAAACCCTCACCAGAGTAACAATTGGAGGGCAAGTCTGGTGCCAGCAGCCGCGGTAATTCCAGCTCCAATAGCGTATATTAAACTTGTTGCAGTTAAAAAGCTCGTAGTTGAATTTCTGCGTTATCGAGTTATTGACTCTTGTCTTTAATCGATTTCGCTTTTGGGATTTATCCCTTTTTACTTTGAGAAAATTAGAGTGTTTCAAGCAGACTTTTGTCTTGAATACTTCAGCATGGAATAATAGAGTAGGACTTTGGTTCTATTTTGTTGGTTTTTGAACCTTAGTAATGGTTAATAGGAACGGTTGGGGGCATTCGTATT
RJ5392	Netherlands	Ixodes ricinus	2014	Babesia venatorum	no ambiguous nucleotides	AAATAACAATACAGGGCAATTGTCTTGTAATTGGAATGATGGTGACCTAAACCCTCACCAGAGTAACAATTGGAGGGCAAGTCTGGTGCCAGCAGCCGCGGTAATTCCAGCTCCAATAGCGTATATTAAACTTGTTGCAGTTAAAAAGCTCGTAGTTGAATTTCTGCGTTATCGAGTTATTGACTCTTGTCTTTAATCGATTTCGCTTTTGGGATTTATCCCTTTTTACTTTGAGAAAATTAGAGTGTTTCAAGCAGACTTTTGTCTTGAATACTTCAGCATGGAATAATAGAGTAGGACTTTGGTTCTATTTTGTTGGTTTTTGAACCTTAGTAATGGTTAATAGGAACGGTTGGGGGCATTCGTATT
RJ5667	Netherlands	Ixodes ricinus	2015	Babesia venatorum	no ambiguous nucleotides	AAATAACAATACAGGGCAATTGTCTTGTAATTGGAATGATGGTGACCTAAACCCTCACCAGAGTAACAATTGGAGGGCAAGTCTGGTGCCAGCAGCCGCGGTAATTCCAGCTCCAATAGCGTATATTAAACTTGTTGCAGTTAAAAAGCTCGTAGTTGAATTTCTGCGTTATCGAGTTATTGACTCTTGTCTTTAATCGATTTCGCTTTTGGGATTTATCCCTTTTTACTTTGAGAAAATTAGAGTGTTTCAAGCAGACTTTTGTCTTGAATACTTCAGCATGGAATAATAGAGTAGGACTTTGGTTCTATTTTGTTGGTTTTTGAACCTTAGTAATGGTTAATAGGAACGGTTGGGGGCATTCGTATT
RJ5752	Netherlands	Ixodes ricinus	2015	Babesia venatorum	no ambiguous nucleotides	AAATAACAATACAGGGCAATTGTCTTGTAATTGGAATGATGGTGACCTAAACCCTCACCAGAGTAACAATTGGAGGGCAAGTCTGGTGCCAGCAGCCGCGGTAATTCCAGCTCCAATAGCGTATATTAAACTTGTTGCAGTTAAAAAGCTCGTAGTTGAATTTCTGCGTTATCGAGTTATTGACTCTTGTCTTTAATCGATTTCGCTTTTGGGATTTATCCCTTTTTACTTTGAGAAAATTAGAGTGTTTCAAGCAGACTTTTGTCTTGAATACTTCAGCATGGAATAATAGAGTAGGACTTTGGTTCTATTTTGTTGGTTTTTGAACCTTAGTAATGGTTAATAGGAACGGTTGGGGGCATTCGTATT
RJ5813	Netherlands	Ixodes ricinus	2015	Babesia venatorum	no ambiguous nucleotides	AAATAACAATACAGGGCAATTGTCTTGTAATTGGAATGATGGTGACCTAAACCCTCACCAGAGTAACAATTGGAGGGCAAGTCTGGTGCCAGCAGCCGCGGTAATTCCAGCTCCAATAGCGTATATTAAACTTGTTGCAGTTAAAAAGCTCGTAGTTGAATTTCTGCGTTATCGAGTTATTGACTCTTGTCTTTAATCGATTTCGCTTTTGGGATTTATCCCTTTTTACTTTGAGAAAATTAGAGTGTTTCAAGCAGACTTTTGTCTTGAATACTTCAGCATGGAATAATAGAGTAGGACTTTGGTTCTATTTTGTTGGTTTTTGAACCTTAGTAATGGTTAATAGGAACGGTTGGGGGCATTCGTATT
RJ5867	Netherlands	Ixodes ricinus	2015	Babesia venatorum	no ambiguous nucleotides	AAATAACAATACAGGGCAATTGTCTTGTAATTGGAATGATGGTGACCTAAACCCTCACCAGAGTAACAATTGGAGGGCAAGTCTGGTGCCAGCAGCCGCGGTAATTCCAGCTCCAATAGCGTATATTAAACTTGTTGCAGTTAAAAAGCTCGTAGTTGAATTTCTGCGTTATCGAGTTATTGACTCTTGTCTTTAATCGATTTCGCTTTTGGGATTTATCCCTTTTTACTTTGAGAAAATTAGAGTGTTTCAAGCAGACTTTTGTCTTGAATACTTCAGCATGGAATAATAGAGTAGGACTTTGGTTCTATTTTGTTGGTTTTTGAACCTTAGTAATGGTTAATAGGAACGGTTGGGGGCATTCGTATT
RJ6100	Netherlands	Ixodes ricinus	2015	Babesia venatorum	no ambiguous nucleotides	AAATAACAATACAGGGCAATTGTCTTGTAATTGGAATGATGGTGACCTAAACCCTCACCAGAGTAACAATTGGAGGGCAAGTCTGGTGCCAGCAGCCGCGGTAATTCCAGCTCCAATAGCGTATATTAAACTTGTTGCAGTTAAAAAGCTCGTAGTTGAATTTCTGCGTTATCGAGTTATTGACTCTTGTCTTTAATCGATTTCGCTTTTGGGATTTATCCCTTTTTACTTTGAGAAAATTAGAGTGTTTCAAGCAGACTTTTGTCTTGAATACTTCAGCATGGAATAATAGAGTAGGACTTTGGTTCTATTTTGTTGGTTTTTGAACCTTAGTAATGGTTAATAGGAACGGTTGGGGGCATTCGTATT
RJ6140	Netherlands	Ixodes ricinus	2015	Babesia venatorum	no ambiguous nucleotides	AAATAACAATACAGGGCAATTGTCTTGTAATTGGAATGATGGTGACCTAAACCCTCACCAGAGTAACAATTGGAGGGCAAGTCTGGTGCCAGCAGCCGCGGTAATTCCAGCTCCAATAGCGTATATTAAACTTGTTGCAGTTAAAAAGCTCGTAGTTGAATTTCTGCGTTATCGAGTTATTGACTCTTGTCTTTAATCGATTTCGCTTTTGGGATTTATCCCTTTTTACTTTGAGAAAATTAGAGTGTTTCAAGCAGACTTTTGTCTTGAATACTTCAGCATGGAATAATAGAGTAGGACTTTGGTTCTATTTTGTTGGTTTTTGAACCTTAGTAATGGTTAATAGGAACGGTTGGGGGCATTCGTATT
RJ6312	Netherlands	Ixodes ricinus	2015	Babesia venatorum	no ambiguous nucleotides	AAATAACAATACAGGGCAATTGTCTTGTAATTGGAATGATGGTGACCTAAACCCTCACCAGAGTAACAATTGGAGGGCAAGTCTGGTGCCAGCAGCCGCGGTAATTCCAGCTCCAATAGCGTATATTAAACTTGTTGCAGTTAAAAAGCTCGTAGTTGAATTTCTGCGTTATCGAGTTATTGACTCTTGTCTTTAATCGATTTCGCTTTTGGGATTTATCCCTTTTTACTTTGAGAAAATTAGAGTGTTTCAAGCAGACTTTTGTCTTGAATACTTCAGCATGGAATAATAGAGTAGGACTTTGGTTCTATTTTGTTGGTTTTTGAACCTTAGTAATGGTTAATAGGAACGGTTGGGGGCATTCGTATT
RJ6505	Netherlands	Ixodes ricinus	2015	Babesia venatorum	no ambiguous nucleotides	AAATAACAATACAGGGCAATTGTCTTGTAATTGGAATGATGGTGACCTAAACCCTCACCAGAGTAACAATTGGAGGGCAAGTCTGGTGCCAGCAGCCGCGGTAATTCCAGCTCCAATAGCGTATATTAAACTTGTTGCAGTTAAAAAGCTCGTAGTTGAATTTCTGCGTTATCGAGTTATTGACTCTTGTCTTTAATCGATTTCGCTTTTGGGATTTATCCCTTTTTACTTTGAGAAAATTAGAGTGTTTCAAGCAGACTTTTGTCTTGAATACTTCAGCATGGAATAATAGAGTAGGACTTTGGTTCTATTTTGTTGGTTTTTGAACCTTAGTAATGGTTAATAGGAACGGTTGGGGGCATTCGTATT
RJ6602	Netherlands	Ixodes ricinus	2015	Babesia venatorum	no ambiguous nucleotides	AAATAACAATACAGGGCAATTGTCTTGTAATTGGAATGATGGTGACCTAAACCCTCACCAGAGTAACAATTGGAGGGCAAGTCTGGTGCCAGCAGCCGCGGTAATTCCAGCTCCAATAGCGTATATTAAACTTGTTGCAGTTAAAAAGCTCGTAGTTGAATTTCTGCGTTATCGAGTTATTGACTCTTGTCTTTAATCGATTTCGCTTTTGGGATTTATCCCTTTTTACTTTGAGAAAATTAGAGTGTTTCAAGCAGACTTTTGTCTTGAATACTTCAGCATGGAATAATAGAGTAGGACTTTGGTTCTATTTTGTTGGTTTTTGAACCTTAGTAATGGTTAATAGGAACGGTTGGGGGCATTCGTATT
RJ6938	Netherlands	Ixodes ricinus	2015	Babesia venatorum	no ambiguous nucleotides	AAATAACAATACAGGGCAATTGTCTTGTAATTGGAATGATGGTGACCTAAACCCTCACCAGAGTAACAATTGGAGGGCAAGTCTGGTGCCAGCAGCCGCGGTAATTCCAGCTCCAATAGCGTATATTAAACTTGTTGCAGTTAAAAAGCTCGTAGTTGAATTTCTGCGTTATCGAGTTATTGACTCTTGTCTTTAATCGATTTCGCTTTTGGGATTTATCCCTTTTTACTTTGAGAAAATTAGAGTGTTTCAAGCAGACTTTTGTCTTGAATACTTCAGCATGGAATAATAGAGTAGGACTTTGGTTCTATTTTGTTGGTTTTTGAACCTTAGTAATGGTTAATAGGAACGGTTGGGGGCATTCGTATT
RJ6946	Netherlands	Ixodes ricinus	2015	Babesia venatorum	no ambiguous nucleotides	AAATAACAATACAGGGCAATTGTCTTGTAATTGGAATGATGGTGACCTAAACCCTCACCAGAGTAACAATTGGAGGGCAAGTCTGGTGCCAGCAGCCGCGGTAATTCCAGCTCCAATAGCGTATATTAAACTTGTTGCAGTTAAAAAGCTCGTAGTTGAATTTCTGCGTTATCGAGTTATTGACTCTTGTCTTTAATCGATTTCGCTTTTGGGATTTATCCCTTTTTACTTTGAGAAAATTAGAGTGTTTCAAGCAGACTTTTGTCTTGAATACTTCAGCATGGAATAATAGAGTAGGACTTTGGTTCTATTTTGTTGGTTTTTGAACCTTAGTAATGGTTAATAGGAACGGTTGGGGGCATTCGTATT
RJ7168	Netherlands	Ixodes ricinus	2015	Babesia venatorum	no ambiguous nucleotides	AAATAACAATACAGGGCAATTGTCTTGTAATTGGAATGATGGTGACCTAAACCCTCACCAGAGTAACAATTGGAGGGCAAGTCTGGTGCCAGCAGCCGCGGTAATTCCAGCTCCAATAGCGTATATTAAACTTGTTGCAGTTAAAAAGCTCGTAGTTGAATTTCTGCGTTATCGAGTTATTGACTCTTGTCTTTAATCGATTTCGCTTTTGGGATTTATCCCTTTTTACTTTGAGAAAATTAGAGTGTTTCAAGCAGACTTTTGTCTTGAATACTTCAGCATGGAATAATAGAGTAGGACTTTGGTTCTATTTTGTTGGTTTTTGAACCTTAGTAATGGTTAATAGGAACGGTTGGGGGCATTCGTATT
RJ7581	Netherlands	Ixodes ricinus	2015	Babesia venatorum	no ambiguous nucleotides	AAATAACAATACAGGGCAATTGTCTTGTAATTGGAATGATGGTGACCTAAACCCTCACCAGAGTAACAATTGGAGGGCAAGTCTGGTGCCAGCAGCCGCGGTAATTCCAGCTCCAATAGCGTATATTAAACTTGTTGCAGTTAAAAAGCTCGTAGTTGAATTTCTGCGTTATCGAGTTATTGACTCTTGTCTTTAATCGATTTCGCTTTTGGGATTTATCCCTTTTTACTTTGAGAAAATTAGAGTGTTTCAAGCAGACTTTTGTCTTGAATACTTCAGCATGGAATAATAGAGTAGGACTTTGGTTCTATTTTGTTGGTTTTTGAACCTTAGTAATGGTTAATAGGAACGGTTGGGGGCATTCGTATT
RJ785	Netherlands	Ixodes ricinus	2013	Babesia venatorum	no ambiguous nucleotides	AAATAACAATACAGGGCAATTGTCTTGTAATTGGAATGATGGTGACCTAAACCCTCACCAGAGTAACAATTGGAGGGCAAGTCTGGTGCCAGCAGCCGCGGTAATTCCAGCTCCAATAGCGTATATTAAACTTGTTGCAGTTAAAAAGCTCGTAGTTGAATTTCTGCGTTATCGAGTTATTGACTCTTGTCTTTAATCGATTTCGCTTTTGGGATTTATCCCTTTTTACTTTGAGAAAATTAGAGTGTTTCAAGCAGACTTTTGTCTTGAATACTTCAGCATGGAATAATAGAGTAGGACTTTGGTTCTATTTTGTTGGTTTTTGAACCTTAGTAATGGTTAATAGGAACGGTTGGGGGCATTCGTATT
RJ927	Netherlands	Ixodes ricinus	2013	Babesia venatorum	no ambiguous nucleotides	AAATAACAATACAGGGCAATTGTCTTGTAATTGGAATGATGGTGACCTAAACCCTCACCAGAGTAACAATTGGAGGGCAAGTCTGGTGCCAGCAGCCGCGGTAATTCCAGCTCCAATAGCGTATATTAAACTTGTTGCAGTTAAAAAGCTCGTAGTTGAATTTCTGCGTTATCGAGTTATTGACTCTTGTCTTTAATCGATTTCGCTTTTGGGATTTATCCCTTTTTACTTTGAGAAAATTAGAGTGTTTCAAGCAGACTTTTGTCTTGAATACTTCAGCATGGAATAATAGAGTAGGACTTTGGTTCTATTTTGTTGGTTTTTGAACCTTAGTAATGGTTAATAGGAACGGTTGGGGGCATTCGTATT
RJ948	Netherlands	Ixodes ricinus	2013	Babesia venatorum	no ambiguous nucleotides	AAATAACAATACAGGGCAATTGTCTTGTAATTGGAATGATGGTGACCTAAACCCTCACCAGAGTAACAATTGGAGGGCAAGTCTGGTGCCAGCAGCCGCGGTAATTCCAGCTCCAATAGCGTATATTAAACTTGTTGCAGTTAAAAAGCTCGTAGTTGAATTTCTGCGTTATCGAGTTATTGACTCTTGTCTTTAATCGATTTCGCTTTTGGGATTTATCCCTTTTTACTTTGAGAAAATTAGAGTGTTTCAAGCAGACTTTTGTCTTGAATACTTCAGCATGGAATAATAGAGTAGGACTTTGGTTCTATTTTGTTGGTTTTTGAACCTTAGTAATGGTTAATAGGAACGGTTGGGGGCATTCGTATT
TR2343	Netherlands	Ixodes ricinus	2012	Babesia venatorum	no ambiguous nucleotides	AAATAACAATACAGGGCAATTGTCTTGTAATTGGAATGATGGTGACCTAAACCCTCACCAGAGTAACAATTGGAGGGCAAGTCTGGTGCCAGCAGCCGCGGTAATTCCAGCTCCAATAGCGTATATTAAACTTGTTGCAGTTAAAAAGCTCGTAGTTGAATTTCTGCGTTATCGAGTTATTGACTCTTGTCTTTAATCGATTTCGCTTTTGGGATTTATCCCTTTTTACTTTGAGAAAATTAGAGTGTTTCAAGCAGACTTTTGTCTTGAATACTTCAGCATGGAATAATAGAGTAGGACTTTGGTTCTATTTTGTTGGTTTTTGAACCTTAGTAATGGTTAATAGGAACGGTTGGGGGCATTCGTATT
TR2419	Netherlands	Ixodes ricinus	2012	Babesia venatorum	no ambiguous nucleotides	AAATAACAATACAGGGCAATTGTCTTGTAATTGGAATGATGGTGACCTAAACCCTCACCAGAGTAACAATTGGAGGGCAAGTCTGGTGCCAGCAGCCGCGGTAATTCCAGCTCCAATAGCGTATATTAAACTTGTTGCAGTTAAAAAGCTCGTAGTTGAATTTCTGCGTTATCGAGTTATTGACTCTTGTCTTTAATCGATTTCGCTTTTGGGATTTATCCCTTTTTACTTTGAGAAAATTAGAGTGTTTCAAGCAGACTTTTGTCTTGAATACTTCAGCATGGAATAATAGAGTAGGACTTTGGTTCTATTTTGTTGGTTTTTGAACCTTAGTAATGGTTAATAGGAACGGTTGGGGGCATTCGTATT
TR2524	Netherlands	Ixodes ricinus	2012	Babesia venatorum	no ambiguous nucleotides	AAATAACAATACAGGGCAATTGTCTTGTAATTGGAATGATGGTGACCTAAACCCTCACCAGAGTAACAATTGGAGGGCAAGTCTGGTGCCAGCAGCCGCGGTAATTCCAGCTCCAATAGCGTATATTAAACTTGTTGCAGTTAAAAAGCTCGTAGTTGAATTTCTGCGTTATCGAGTTATTGACTCTTGTCTTTAATCGATTTCGCTTTTGGGATTTATCCCTTTTTACTTTGAGAAAATTAGAGTGTTTCAAGCAGACTTTTGTCTTGAATACTTCAGCATGGAATAATAGAGTAGGACTTTGGTTCTATTTTGTTGGTTTTTGAACCTTAGTAATGGTTAATAGGAACGGTTGGGGGCATTCGTATT
TR2549	Netherlands	Ixodes ricinus	2012	Babesia venatorum	no ambiguous nucleotides	AAATAACAATACAGGGCAATTGTCTTGTAATTGGAATGATGGTGACCTAAACCCTCACCAGAGTAACAATTGGAGGGCAAGTCTGGTGCCAGCAGCCGCGGTAATTCCAGCTCCAATAGCGTATATTAAACTTGTTGCAGTTAAAAAGCTCGTAGTTGAATTTCTGCGTTATCGAGTTATTGACTCTTGTCTTTAATCGATTTCGCTTTTGGGATTTATCCCTTTTTACTTTGAGAAAATTAGAGTGTTTCAAGCAGACTTTTGTCTTGAATACTTCAGCATGGAATAATAGAGTAGGACTTTGGTTCTATTTTGTTGGTTTTTGAACCTTAGTAATGGTTAATAGGAACGGTTGGGGGCATTCGTATT
TR363	Netherlands	Ixodes ricinus	2012	Babesia venatorum	no ambiguous nucleotides	AAATAACAATACAGGGCAATTGTCTTGTAATTGGAATGATGGTGACCTAAACCCTCACCAGAGTAACAATTGGAGGGCAAGTCTGGTGCCAGCAGCCGCGGTAATTCCAGCTCCAATAGCGTATATTAAACTTGTTGCAGTTAAAAAGCTCGTAGTTGAATTTCTGCGTTATCGAGTTATTGACTCTTGTCTTTAATCGATTTCGCTTTTGGGATTTATCCCTTTTTACTTTGAGAAAATTAGAGTGTTTCAAGCAGACTTTTGTCTTGAATACTTCAGCATGGAATAATAGAGTAGGACTTTGGTTCTATTTTGTTGGTTTTTGAACCTTAGTAATGGTTAATAGGAACGGTTGGGGGCATTCGTATT
TR479	Netherlands	Ixodes ricinus	2012	Babesia venatorum	no ambiguous nucleotides	AAATAACAATACAGGGCAATTGTCTTGTAATTGGAATGATGGTGACCTAAACCCTCACCAGAGTAACAATTGGAGGGCAAGTCTGGTGCCAGCAGCCGCGGTAATTCCAGCTCCAATAGCGTATATTAAACTTGTTGCAGTTAAAAAGCTCGTAGTTGAATTTCTGCGTTATCGAGTTATTGACTCTTGTCTTTAATCGATTTCGCTTTTGGGATTTATCCCTTTTTACTTTGAGAAAATTAGAGTGTTTCAAGCAGACTTTTGTCTTGAATACTTCAGCATGGAATAATAGAGTAGGACTTTGGTTCTATTTTGTTGGTTTTTGAACCTTAGTAATGGTTAATAGGAACGGTTGGGGGCATTCGTATT
TR532	Netherlands	Ixodes ricinus	2012	Babesia venatorum	no ambiguous nucleotides	AAATAACAATACAGGGCAATTGTCTTGTAATTGGAATGATGGTGACCTAAACCCTCACCAGAGTAACAATTGGAGGGCAAGTCTGGTGCCAGCAGCCGCGGTAATTCCAGCTCCAATAGCGTATATTAAACTTGTTGCAGTTAAAAAGCTCGTAGTTGAATTTCTGCGTTATCGAGTTATTGACTCTTGTCTTTAATCGATTTCGCTTTTGGGATTTATCCCTTTTTACTTTGAGAAAATTAGAGTGTTTCAAGCAGACTTTTGTCTTGAATACTTCAGCATGGAATAATAGAGTAGGACTTTGGTTCTATTTTGTTGGTTTTTGAACCTTAGTAATGGTTAATAGGAACGGTTGGGGGCATTCGTATT
TTPP1389	Netherlands	Ixodes ricinus	2013	Babesia venatorum	no ambiguous nucleotides	AAATAACAATACAGGGCAATTGTCTTGTAATTGGAATGATGGTGACCTAAACCCTCACCAGAGTAACAATTGGAGGGCAAGTCTGGTGCCAGCAGCCGCGGTAATTCCAGCTCCAATAGCGTATATTAAACTTGTTGCAGTTAAAAAGCTCGTAGTTGAATTTCTGCGTTATCGAGTTATTGACTCTTGTCTTTAATCGATTTCGCTTTTGGGATTTATCCCTTTTTACTTTGAGAAAATTAGAGTGTTTCAAGCAGACTTTTGTCTTGAATACTTCAGCATGGAATAATAGAGTAGGACTTTGGTTCTATTTTGTTGGTTTTTGAACCTTAGTAATGGTTAATAGGAACGGTTGGGGGCATTCGTATT
TTPP1975	Netherlands	Ixodes ricinus	2013	Babesia venatorum	no ambiguous nucleotides	AAATAACAATACAGGGCAATTGTCTTGTAATTGGAATGATGGTGACCTAAACCCTCACCAGAGTAACAATTGGAGGGCAAGTCTGGTGCCAGCAGCCGCGGTAATTCCAGCTCCAATAGCGTATATTAAACTTGTTGCAGTTAAAAAGCTCGTAGTTGAATTTCTGCGTTATCGAGTTATTGACTCTTGTCTTTAATCGATTTCGCTTTTGGGATTTATCCCTTTTTACTTTGAGAAAATTAGAGTGTTTCAAGCAGACTTTTGTCTTGAATACTTCAGCATGGAATAATAGAGTAGGACTTTGGTTCTATTTTGTTGGTTTTTGAACCTTAGTAATGGTTAATAGGAACGGTTGGGGGCATTCGTATT
TTPP1994	Netherlands	Ixodes ricinus	2013	Babesia venatorum	no ambiguous nucleotides	AAATAACAATACAGGGCAATTGTCTTGTAATTGGAATGATGGTGACCTAAACCCTCACCAGAGTAACAATTGGAGGGCAAGTCTGGTGCCAGCAGCCGCGGTAATTCCAGCTCCAATAGCGTATATTAAACTTGTTGCAGTTAAAAAGCTCGTAGTTGAATTTCTGCGTTATCGAGTTATTGACTCTTGTCTTTAATCGATTTCGCTTTTGGGATTTATCCCTTTTTACTTTGAGAAAATTAGAGTGTTTCAAGCAGACTTTTGTCTTGAATACTTCAGCATGGAATAATAGAGTAGGACTTTGGTTCTATTTTGTTGGTTTTTGAACCTTAGTAATGGTTAATAGGAACGGTTGGGGGCATTCGTATT
TTPP2034	Netherlands	Ixodes ricinus	2013	Babesia venatorum	no ambiguous nucleotides	AAATAACAATACAGGGCAATTGTCTTGTAATTGGAATGATGGTGACCTAAACCCTCACCAGAGTAACAATTGGAGGGCAAGTCTGGTGCCAGCAGCCGCGGTAATTCCAGCTCCAATAGCGTATATTAAACTTGTTGCAGTTAAAAAGCTCGTAGTTGAATTTCTGCGTTATCGAGTTATTGACTCTTGTCTTTAATCGATTTCGCTTTTGGGATTTATCCCTTTTTACTTTGAGAAAATTAGAGTGTTTCAAGCAGACTTTTGTCTTGAATACTTCAGCATGGAATAATAGAGTAGGACTTTGGTTCTATTTTGTTGGTTTTTGAACCTTAGTAATGGTTAATAGGAACGGTTGGGGGCATTCGTATT
TTPP2059	Netherlands	Ixodes ricinus	2013	Babesia venatorum	no ambiguous nucleotides	AAATAACAATACAGGGCAATTGTCTTGTAATTGGAATGATGGTGACCTAAACCCTCACCAGAGTAACAATTGGAGGGCAAGTCTGGTGCCAGCAGCCGCGGTAATTCCAGCTCCAATAGCGTATATTAAACTTGTTGCAGTTAAAAAGCTCGTAGTTGAATTTCTGCGTTATCGAGTTATTGACTCTTGTCTTTAATCGATTTCGCTTTTGGGATTTATCCCTTTTTACTTTGAGAAAATTAGAGTGTTTCAAGCAGACTTTTGTCTTGAATACTTCAGCATGGAATAATAGAGTAGGACTTTGGTTCTATTTTGTTGGTTTTTGAACCTTAGTAATGGTTAATAGGAACGGTTGGGGGCATTCGTATT
TTPP2092	Netherlands	Ixodes ricinus	2013	Babesia venatorum	no ambiguous nucleotides	AAATAACAATACAGGGCAATTGTCTTGTAATTGGAATGATGGTGACCTAAACCCTCACCAGAGTAACAATTGGAGGGCAAGTCTGGTGCCAGCAGCCGCGGTAATTCCAGCTCCAATAGCGTATATTAAACTTGTTGCAGTTAAAAAGCTCGTAGTTGAATTTCTGCGTTATCGAGTTATTGACTCTTGTCTTTAATCGATTTCGCTTTTGGGATTTATCCCTTTTTACTTTGAGAAAATTAGAGTGTTTCAAGCAGACTTTTGTCTTGAATACTTCAGCATGGAATAATAGAGTAGGACTTTGGTTCTATTTTGTTGGTTTTTGAACCTTAGTAATGGTTAATAGGAACGGTTGGGGGCATTCGTATT
TTPP2182	Netherlands	Ixodes ricinus	2013	Babesia venatorum	no ambiguous nucleotides	AAATAACAATACAGGGCAATTGTCTTGTAATTGGAATGATGGTGACCTAAACCCTCACCAGAGTAACAATTGGAGGGCAAGTCTGGTGCCAGCAGCCGCGGTAATTCCAGCTCCAATAGCGTATATTAAACTTGTTGCAGTTAAAAAGCTCGTAGTTGAATTTCTGCGTTATCGAGTTATTGACTCTTGTCTTTAATCGATTTCGCTTTTGGGATTTATCCCTTTTTACTTTGAGAAAATTAGAGTGTTTCAAGCAGACTTTTGTCTTGAATACTTCAGCATGGAATAATAGAGTAGGACTTTGGTTCTATTTTGTTGGTTTTTGAACCTTAGTAATGGTTAATAGGAACGGTTGGGGGCATTCGTATT
TTPP2197	Netherlands	Ixodes ricinus	2013	Babesia venatorum	no ambiguous nucleotides	AAATAACAATACAGGGCAATTGTCTTGTAATTGGAATGATGGTGACCTAAACCCTCACCAGAGTAACAATTGGAGGGCAAGTCTGGTGCCAGCAGCCGCGGTAATTCCAGCTCCAATAGCGTATATTAAACTTGTTGCAGTTAAAAAGCTCGTAGTTGAATTTCTGCGTTATCGAGTTATTGACTCTTGTCTTTAATCGATTTCGCTTTTGGGATTTATCCCTTTTTACTTTGAGAAAATTAGAGTGTTTCAAGCAGACTTTTGTCTTGAATACTTCAGCATGGAATAATAGAGTAGGACTTTGGTTCTATTTTGTTGGTTTTTGAACCTTAGTAATGGTTAATAGGAACGGTTGGGGGCATTCGTATT
TTPP2489	Netherlands	Ixodes ricinus	2013	Babesia venatorum	no ambiguous nucleotides	AAATAACAATACAGGGCAATTGTCTTGTAATTGGAATGATGGTGACCTAAACCCTCACCAGAGTAACAATTGGAGGGCAAGTCTGGTGCCAGCAGCCGCGGTAATTCCAGCTCCAATAGCGTATATTAAACTTGTTGCAGTTAAAAAGCTCGTAGTTGAATTTCTGCGTTATCGAGTTATTGACTCTTGTCTTTAATCGATTTCGCTTTTGGGATTTATCCCTTTTTACTTTGAGAAAATTAGAGTGTTTCAAGCAGACTTTTGTCTTGAATACTTCAGCATGGAATAATAGAGTAGGACTTTGGTTCTATTTTGTTGGTTTTTGAACCTTAGTAATGGTTAATAGGAACGGTTGGGGGCATTCGTATT
TTPP2535	Netherlands	Ixodes ricinus	2013	Babesia venatorum	no ambiguous nucleotides	AAATAACAATACAGGGCAATTGTCTTGTAATTGGAATGATGGTGACCTAAACCCTCACCAGAGTAACAATTGGAGGGCAAGTCTGGTGCCAGCAGCCGCGGTAATTCCAGCTCCAATAGCGTATATTAAACTTGTTGCAGTTAAAAAGCTCGTAGTTGAATTTCTGCGTTATCGAGTTATTGACTCTTGTCTTTAATCGATTTCGCTTTTGGGATTTATCCCTTTTTACTTTGAGAAAATTAGAGTGTTTCAAGCAGACTTTTGTCTTGAATACTTCAGCATGGAATAATAGAGTAGGACTTTGGTTCTATTTTGTTGGTTTTTGAACCTTAGTAATGGTTAATAGGAACGGTTGGGGGCATTCGTATT
TTPP513	Netherlands	Ixodes ricinus	2013	Babesia venatorum	no ambiguous nucleotides	AAATAACAATACAGGGCAATTGTCTTGTAATTGGAATGATGGTGACCTAAACCCTCACCAGAGTAACAATTGGAGGGCAAGTCTGGTGCCAGCAGCCGCGGTAATTCCAGCTCCAATAGCGTATATTAAACTTGTTGCAGTTAAAAAGCTCGTAGTTGAATTTCTGCGTTATCGAGTTATTGACTCTTGTCTTTAATCGATTTCGCTTTTGGGATTTATCCCTTTTTACTTTGAGAAAATTAGAGTGTTTCAAGCAGACTTTTGTCTTGAATACTTCAGCATGGAATAATAGAGTAGGACTTTGGTTCTATTTTGTTGGTTTTTGAACCTTAGTAATGGTTAATAGGAACGGTTGGGGGCATTCGTATT
TTPP546	Netherlands	Ixodes ricinus	2013	Babesia venatorum	no ambiguous nucleotides	AAATAACAATACAGGGCAATTGTCTTGTAATTGGAATGATGGTGACCTAAACCCTCACCAGAGTAACAATTGGAGGGCAAGTCTGGTGCCAGCAGCCGCGGTAATTCCAGCTCCAATAGCGTATATTAAACTTGTTGCAGTTAAAAAGCTCGTAGTTGAATTTCTGCGTTATCGAGTTATTGACTCTTGTCTTTAATCGATTTCGCTTTTGGGATTTATCCCTTTTTACTTTGAGAAAATTAGAGTGTTTCAAGCAGACTTTTGTCTTGAATACTTCAGCATGGAATAATAGAGTAGGACTTTGGTTCTATTTTGTTGGTTTTTGAACCTTAGTAATGGTTAATAGGAACGGTTGGGGGCATTCGTATT
UrbanRural1055	Belgium	Ixodes ricinus	2016	Babesia venatorum	no ambiguous nucleotides	AAATAACAATACAGGGCAATTGTCTTGTAATTGGAATGATGGTGACCTAAACCCTCACCAGAGTAACAATTGGAGGGCAAGTCTGGTGCCAGCAGCCGCGGTAATTCCAGCTCCAATAGCGTATATTAAACTTGTTGCAGTTAAAAAGCTCGTAGTTGAATTTCTGCGTTATCGAGTTATTGACTCTTGTCTTTAATCGATTTCGCTTTTGGGATTTATCCCTTTTTACTTTGAGAAAATTAGAGTGTTTCAAGCAGACTTTTGTCTTGAATACTTCAGCATGGAATAATAGAGTAGGACTTTGGTTCTATTTTGTTGGTTTTTGAACCTTAGTAATGGTTAATAGGAACGGTTGGGGGCATTCGTATT
UrbanRural1091	Belgium	Ixodes ricinus	2016	Babesia venatorum	no ambiguous nucleotides	AAATAACAATACAGGGCAATTGTCTTGTAATTGGAATGATGGTGACCTAAACCCTCACCAGAGTAACAATTGGAGGGCAAGTCTGGTGCCAGCAGCCGCGGTAATTCCAGCTCCAATAGCGTATATTAAACTTGTTGCAGTTAAAAAGCTCGTAGTTGAATTTCTGCGTTATCGAGTTATTGACTCTTGTCTTTAATCGATTTCGCTTTTGGGATTTATCCCTTTTTACTTTGAGAAAATTAGAGTGTTTCAAGCAGACTTTTGTCTTGAATACTTCAGCATGGAATAATAGAGTAGGACTTTGGTTCTATTTTGTTGGTTTTTGAACCTTAGTAATGGTTAATAGGAACGGTTGGGGGCATTCGTATT
UrbanRural1270	Belgium	Ixodes ricinus	2016	Babesia venatorum	no ambiguous nucleotides	AAATAACAATACAGGGCAATTGTCTTGTAATTGGAATGATGGTGACCTAAACCCTCACCAGAGTAACAATTGGAGGGCAAGTCTGGTGCCAGCAGCCGCGGTAATTCCAGCTCCAATAGCGTATATTAAACTTGTTGCAGTTAAAAAGCTCGTAGTTGAATTTCTGCGTTATCGAGTTATTGACTCTTGTCTTTAATCGATTTCGCTTTTGGGATTTATCCCTTTTTACTTTGAGAAAATTAGAGTGTTTCAAGCAGACTTTTGTCTTGAATACTTCAGCATGGAATAATAGAGTAGGACTTTGGTTCTATTTTGTTGGTTTTTGAACCTTAGTAATGGTTAATAGGAACGGTTGGGGGCATTCGTATT
UrbanRural1530	Belgium	Ixodes ricinus	2016	Babesia venatorum	no ambiguous nucleotides	AAATAACAATACAGGGCAATTGTCTTGTAATTGGAATGATGGTGACCTAAACCCTCACCAGAGTAACAATTGGAGGGCAAGTCTGGTGCCAGCAGCCGCGGTAATTCCAGCTCCAATAGCGTATATTAAACTTGTTGCAGTTAAAAAGCTCGTAGTTGAATTTCTGCGTTATCGAGTTATTGACTCTTGTCTTTAATCGATTTCGCTTTTGGGATTTATCCCTTTTTACTTTGAGAAAATTAGAGTGTTTCAAGCAGACTTTTGTCTTGAATACTTCAGCATGGAATAATAGAGTAGGACTTTGGTTCTATTTTGTTGGTTTTTGAACCTTAGTAATGGTTAATAGGAACGGTTGGGGGCATTCGTATT
UrbanRural1590	Belgium	Ixodes ricinus		Babesia venatorum	no ambiguous nucleotides	AAATAACAATACAGGGCAATTGTCTTGTAATTGGAATGATGGTGACCTAAACCCTCACCAGAGTAACAATTGGAGGGCAAGTCTGGTGCCAGCAGCCGCGGTAATTCCAGCTCCAATAGCGTATATTAAACTTGTTGCAGTTAAAAAGCTCGTAGTTGAATTTCTGCGTTATCGAGTTATTGACTCTTGTCTTTAATCGATTTCGCTTTTGGGATTTATCCCTTTTTACTTTGAGAAAATTAGAGTGTTTCAAGCAGACTTTTGTCTTGAATACTTCAGCATGGAATAATAGAGTAGGACTTTGGTTCTATTTTGTTGGTTTTTGAACCTTAGTAATGGTTAATAGGAACGGTTGGGGGCATTCGTATT
UrbanRural1967	Belgium	Ixodes ricinus		Babesia venatorum	no ambiguous nucleotides	AAATAACAATACAGGGCAATTGTCTTGTAATTGGAATGATGGTGACCTAAACCCTCACCAGAGTAACAATTGGAGGGCAAGTCTGGTGCCAGCAGCCGCGGTAATTCCAGCTCCAATAGCGTATATTAAACTTGTTGCAGTTAAAAAGCTCGTAGTTGAATTTCTGCGTTATCGAGTTATTGACTCTTGTCTTTAATCGATTTCGCTTTTGGGATTTATCCCTTTTTACTTTGAGAAAATTAGAGTGTTTCAAGCAGACTTTTGTCTTGAATACTTCAGCATGGAATAATAGAGTAGGACTTTGGTTCTATTTTGTTGGTTTTTGAACCTTAGTAATGGTTAATAGGAACGGTTGGGGGCATTCGTATT
UrbanRural469	Belgium	Ixodes ricinus	2016	Babesia venatorum	no ambiguous nucleotides	AAATAACAATACAGGGCAATTGTCTTGTAATTGGAATGATGGTGACCTAAACCCTCACCAGAGTAACAATTGGAGGGCAAGTCTGGTGCCAGCAGCCGCGGTAATTCCAGCTCCAATAGCGTATATTAAACTTGTTGCAGTTAAAAAGCTCGTAGTTGAATTTCTGCGTTATCGAGTTATTGACTCTTGTCTTTAATCGATTTCGCTTTTGGGATTTATCCCTTTTTACTTTGAGAAAATTAGAGTGTTTCAAGCAGACTTTTGTCTTGAATACTTCAGCATGGAATAATAGAGTAGGACTTTGGTTCTATTTTGTTGGTTTTTGAACCTTAGTAATGGTTAATAGGAACGGTTGGGGGCATTCGTATT
UrbanRural470	Belgium	Ixodes ricinus	2016	Babesia venatorum	no ambiguous nucleotides	AAATAACAATACAGGGCAATTGTCTTGTAATTGGAATGATGGTGACCTAAACCCTCACCAGAGTAACAATTGGAGGGCAAGTCTGGTGCCAGCAGCCGCGGTAATTCCAGCTCCAATAGCGTATATTAAACTTGTTGCAGTTAAAAAGCTCGTAGTTGAATTTCTGCGTTATCGAGTTATTGACTCTTGTCTTTAATCGATTTCGCTTTTGGGATTTATCCCTTTTTACTTTGAGAAAATTAGAGTGTTTCAAGCAGACTTTTGTCTTGAATACTTCAGCATGGAATAATAGAGTAGGACTTTGGTTCTATTTTGTTGGTTTTTGAACCTTAGTAATGGTTAATAGGAACGGTTGGGGGCATTCGTATT
UrbanRural533	Belgium	Ixodes ricinus	2016	Babesia venatorum	no ambiguous nucleotides	AAATAACAATACAGGGCAATTGTCTTGTAATTGGAATGATGGTGACCTAAACCCTCACCAGAGTAACAATTGGAGGGCAAGTCTGGTGCCAGCAGCCGCGGTAATTCCAGCTCCAATAGCGTATATTAAACTTGTTGCAGTTAAAAAGCTCGTAGTTGAATTTCTGCGTTATCGAGTTATTGACTCTTGTCTTTAATCGATTTCGCTTTTGGGATTTATCCCTTTTTACTTTGAGAAAATTAGAGTGTTTCAAGCAGACTTTTGTCTTGAATACTTCAGCATGGAATAATAGAGTAGGACTTTGGTTCTATTTTGTTGGTTTTTGAACCTTAGTAATGGTTAATAGGAACGGTTGGGGGCATTCGTATT
UrbanRural547	Belgium	Ixodes ricinus	2016	Babesia venatorum	no ambiguous nucleotides	AAATAACAATACAGGGCAATTGTCTTGTAATTGGAATGATGGTGACCTAAACCCTCACCAGAGTAACAATTGGAGGGCAAGTCTGGTGCCAGCAGCCGCGGTAATTCCAGCTCCAATAGCGTATATTAAACTTGTTGCAGTTAAAAAGCTCGTAGTTGAATTTCTGCGTTATCGAGTTATTGACTCTTGTCTTTAATCGATTTCGCTTTTGGGATTTATCCCTTTTTACTTTGAGAAAATTAGAGTGTTTCAAGCAGACTTTTGTCTTGAATACTTCAGCATGGAATAATAGAGTAGGACTTTGGTTCTATTTTGTTGGTTTTTGAACCTTAGTAATGGTTAATAGGAACGGTTGGGGGCATTCGTATT
UrbanRural549	Belgium	Ixodes ricinus	2016	Babesia venatorum	no ambiguous nucleotides	AAATAACAATACAGGGCAATTGTCTTGTAATTGGAATGATGGTGACCTAAACCCTCACCAGAGTAACAATTGGAGGGCAAGTCTGGTGCCAGCAGCCGCGGTAATTCCAGCTCCAATAGCGTATATTAAACTTGTTGCAGTTAAAAAGCTCGTAGTTGAATTTCTGCGTTATCGAGTTATTGACTCTTGTCTTTAATCGATTTCGCTTTTGGGATTTATCCCTTTTTACTTTGAGAAAATTAGAGTGTTTCAAGCAGACTTTTGTCTTGAATACTTCAGCATGGAATAATAGAGTAGGACTTTGGTTCTATTTTGTTGGTTTTTGAACCTTAGTAATGGTTAATAGGAACGGTTGGGGGCATTCGTATT
UrbanRural582	Belgium	Ixodes ricinus	2016	Babesia venatorum	no ambiguous nucleotides	AAATAACAATACAGGGCAATTGTCTTGTAATTGGAATGATGGTGACCTAAACCCTCACCAGAGTAACAATTGGAGGGCAAGTCTGGTGCCAGCAGCCGCGGTAATTCCAGCTCCAATAGCGTATATTAAACTTGTTGCAGTTAAAAAGCTCGTAGTTGAATTTCTGCGTTATCGAGTTATTGACTCTTGTCTTTAATCGATTTCGCTTTTGGGATTTATCCCTTTTTACTTTGAGAAAATTAGAGTGTTTCAAGCAGACTTTTGTCTTGAATACTTCAGCATGGAATAATAGAGTAGGACTTTGGTTCTATTTTGTTGGTTTTTGAACCTTAGTAATGGTTAATAGGAACGGTTGGGGGCATTCGTATT
UrbanRural587	Belgium	Ixodes ricinus	2016	Babesia venatorum	no ambiguous nucleotides	AAATAACAATACAGGGCAATTGTCTTGTAATTGGAATGATGGTGACCTAAACCCTCACCAGAGTAACAATTGGAGGGCAAGTCTGGTGCCAGCAGCCGCGGTAATTCCAGCTCCAATAGCGTATATTAAACTTGTTGCAGTTAAAAAGCTCGTAGTTGAATTTCTGCGTTATCGAGTTATTGACTCTTGTCTTTAATCGATTTCGCTTTTGGGATTTATCCCTTTTTACTTTGAGAAAATTAGAGTGTTTCAAGCAGACTTTTGTCTTGAATACTTCAGCATGGAATAATAGAGTAGGACTTTGGTTCTATTTTGTTGGTTTTTGAACCTTAGTAATGGTTAATAGGAACGGTTGGGGGCATTCGTATT
UrbanRural595	Belgium	Ixodes ricinus	2016	Babesia venatorum	no ambiguous nucleotides	AAATAACAATACAGGGCAATTGTCTTGTAATTGGAATGATGGTGACCTAAACCCTCACCAGAGTAACAATTGGAGGGCAAGTCTGGTGCCAGCAGCCGCGGTAATTCCAGCTCCAATAGCGTATATTAAACTTGTTGCAGTTAAAAAGCTCGTAGTTGAATTTCTGCGTTATCGAGTTATTGACTCTTGTCTTTAATCGATTTCGCTTTTGGGATTTATCCCTTTTTACTTTGAGAAAATTAGAGTGTTTCAAGCAGACTTTTGTCTTGAATACTTCAGCATGGAATAATAGAGTAGGACTTTGGTTCTATTTTGTTGGTTTTTGAACCTTAGTAATGGTTAATAGGAACGGTTGGGGGCATTCGTATT
UrbanRural644	Belgium	Ixodes ricinus	2016	Babesia venatorum	no ambiguous nucleotides	AAATAACAATACAGGGCAATTGTCTTGTAATTGGAATGATGGTGACCTAAACCCTCACCAGAGTAACAATTGGAGGGCAAGTCTGGTGCCAGCAGCCGCGGTAATTCCAGCTCCAATAGCGTATATTAAACTTGTTGCAGTTAAAAAGCTCGTAGTTGAATTTCTGCGTTATCGAGTTATTGACTCTTGTCTTTAATCGATTTCGCTTTTGGGATTTATCCCTTTTTACTTTGAGAAAATTAGAGTGTTTCAAGCAGACTTTTGTCTTGAATACTTCAGCATGGAATAATAGAGTAGGACTTTGGTTCTATTTTGTTGGTTTTTGAACCTTAGTAATGGTTAATAGGAACGGTTGGGGGCATTCGTATT
UrbanRural706	Belgium	Ixodes ricinus	2016	Babesia venatorum	no ambiguous nucleotides	AAATAACAATACAGGGCAATTGTCTTGTAATTGGAATGATGGTGACCTAAACCCTCACCAGAGTAACAATTGGAGGGCAAGTCTGGTGCCAGCAGCCGCGGTAATTCCAGCTCCAATAGCGTATATTAAACTTGTTGCAGTTAAAAAGCTCGTAGTTGAATTTCTGCGTTATCGAGTTATTGACTCTTGTCTTTAATCGATTTCGCTTTTGGGATTTATCCCTTTTTACTTTGAGAAAATTAGAGTGTTTCAAGCAGACTTTTGTCTTGAATACTTCAGCATGGAATAATAGAGTAGGACTTTGGTTCTATTTTGTTGGTTTTTGAACCTTAGTAATGGTTAATAGGAACGGTTGGGGGCATTCGTATT
UrbanRural783	Belgium	Ixodes ricinus	2016	Babesia venatorum	no ambiguous nucleotides	AAATAACAATACAGGGCAATTGTCTTGTAATTGGAATGATGGTGACCTAAACCCTCACCAGAGTAACAATTGGAGGGCAAGTCTGGTGCCAGCAGCCGCGGTAATTCCAGCTCCAATAGCGTATATTAAACTTGTTGCAGTTAAAAAGCTCGTAGTTGAATTTCTGCGTTATCGAGTTATTGACTCTTGTCTTTAATCGATTTCGCTTTTGGGATTTATCCCTTTTTACTTTGAGAAAATTAGAGTGTTTCAAGCAGACTTTTGTCTTGAATACTTCAGCATGGAATAATAGAGTAGGACTTTGGTTCTATTTTGTTGGTTTTTGAACCTTAGTAATGGTTAATAGGAACGGTTGGGGGCATTCGTATT
UrbanRural837	Belgium	Ixodes ricinus	2016	Babesia venatorum	no ambiguous nucleotides	AAATAACAATACAGGGCAATTGTCTTGTAATTGGAATGATGGTGACCTAAACCCTCACCAGAGTAACAATTGGAGGGCAAGTCTGGTGCCAGCAGCCGCGGTAATTCCAGCTCCAATAGCGTATATTAAACTTGTTGCAGTTAAAAAGCTCGTAGTTGAATTTCTGCGTTATCGAGTTATTGACTCTTGTCTTTAATCGATTTCGCTTTTGGGATTTATCCCTTTTTACTTTGAGAAAATTAGAGTGTTTCAAGCAGACTTTTGTCTTGAATACTTCAGCATGGAATAATAGAGTAGGACTTTGGTTCTATTTTGTTGGTTTTTGAACCTTAGTAATGGTTAATAGGAACGGTTGGGGGCATTCGTATT
UrbanRural924	Belgium	Ixodes ricinus	2016	Babesia venatorum	no ambiguous nucleotides	AAATAACAATACAGGGCAATTGTCTTGTAATTGGAATGATGGTGACCTAAACCCTCACCAGAGTAACAATTGGAGGGCAAGTCTGGTGCCAGCAGCCGCGGTAATTCCAGCTCCAATAGCGTATATTAAACTTGTTGCAGTTAAAAAGCTCGTAGTTGAATTTCTGCGTTATCGAGTTATTGACTCTTGTCTTTAATCGATTTCGCTTTTGGGATTTATCCCTTTTTACTTTGAGAAAATTAGAGTGTTTCAAGCAGACTTTTGTCTTGAATACTTCAGCATGGAATAATAGAGTAGGACTTTGGTTCTATTTTGTTGGTTTTTGAACCTTAGTAATGGTTAATAGGAACGGTTGGGGGCATTCGTATT
1348DST	Netherlands	Ixodes ricinus	2017	Babesia venatorum	no ambiguous nucleotides	ATTGGAATGATGGTGACCTAAACCCTCACCAGAGTAACAATTGGAGGGCAAGTCTGGTGCCAGCAGCCGCGGTAATTCCAGCTCCAATAGCGTATATTAAACTTGTTGCAGTTAAAAAGCTCGTAGTTGAATTTCTGCGTTATCGAGTTATTGACTCTTGTCTTTAATCGATTTCGCTTTTGGGATTTATCCCTTTTTACTTTGAGAAAATTAGAGTGTTTCAAGCAGACTTTTGTCTTGAATACTTCAGCATGGAATAATAGAGTAGGACTTTGGTTCTATTTTGTTGGTTTTTGAACCTTAGTAATGGTTAATAGGAACGGTTGGGGGCATTCGTATT
TTPP906	Netherlands	Ixodes ricinus	2013	Babesia venatorum	no ambiguous nucleotides	TGGAATGATGGTGACCTAAACCCTCACCAGAGTAACAATTGGAGGGCAAGTCTGGTGCCAGCAGCCGCGGTAATTCCAGCTCCAATAGCGTATATTAAACTTGTTGCAGTTAAAAAGCTCGTAGTTGAATTTCTGCGTTATCGAGTTATTGACTCTTGTCTTTAATCGATTTCGCTTTTGGGATTTATCCCTTTTTACTTTGAGAAAATTAGAGTGTTTCAAGCAGACTTTTGTCTTGAATACTTCAGCATGGAATAATAGAGTAGGACTTTGGTTCTATTTTGTTGGTTTTTGAACCTTAGTAATGGTTAATAGGAACGGTTGGGGGCATTCGTATT
TR1962	Netherlands	Ixodes ricinus	2012	Babesia venatorum	no ambiguous nucleotides	ATGATGGTGACCTAAACCCTCACCAGAGTAACAATTGGAGGGCAAGTCTGGTGCCAGCAGCCGCGGTAATTCCAGCTCCAATAGCGTATATTAAACTTGTTGCAGTTAAAAAGCTCGTAGTTGAATTTCTGCGTTATCGAGTTATTGACTCTTGTCTTTAATCGATTTCGCTTTTGGGATTTATCCCTTTTTACTTTGAGAAAATTAGAGTGTTTCAAGCAGACTTTTGTCTTGAATACTTCAGCATGGAATAATAGAGTAGGACTTTGGTTCTATTTTGTTGGTTTTTGAACCTTAGTAATGGTTAATAGGAACGGTTGGGGGCATTCGTATT
TTPP1748	Netherlands	Ixodes ricinus	2013	Babesia venatorum	no ambiguous nucleotides	ATGATGGTGACCTAAACCCTCACCAGAGTAACAATTGGAGGGCAAGTCTGGTGCCAGCAGCCGCGGTAATTCCAGCTCCAATAGCGTATATTAAACTTGTTGCAGTTAAAAAGCTCGTAGTTGAATTTCTGCGTTATCGAGTTATTGACTCTTGTCTTTAATCGATTTCGCTTTTGGGATTTATCCCTTTTTACTTTGAGAAAATTAGAGTGTTTCAAGCAGACTTTTGTCTTGAATACTTCAGCATGGAATAATAGAGTAGGACTTTGGTTCTATTTTGTTGGTTTTTGAACCTTAGTAATGGTTAATAGGAACGGTTGGGGGCATTCGTATT
TR1555	Netherlands	Ixodes ricinus	2012	Babesia venatorum	no ambiguous nucleotides	GATGGTGACCTAAACCCTCACCAGAGTAACAATTGGAGGGCAAGTCTGGTGCCAGCAGCCGCGGTAATTCCAGCTCCAATAGCGTATATTAAACTTGTTGCAGTTAAAAAGCTCGTAGTTGAATTTCTGCGTTATCGAGTTATTGACTCTTGTCTTTAATCGATTTCGCTTTTGGGATTTATCCCTTTTTACTTTGAGAAAATTAGAGTGTTTCAAGCAGACTTTTGTCTTGAATACTTCAGCATGGAATAATAGAGTAGGACTTTGGTTCTATTTTGTTGGTTTTTGAACCTTAGTAATGGTTAATAGGAACGGTTGGGGGCATTCGTATT
TR1837	Netherlands	Ixodes ricinus	2012	Babesia venatorum	no ambiguous nucleotides	GATGGTGACCTAAACCCTCACCAGAGTAACAATTGGAGGGCAAGTCTGGTGCCAGCAGCCGCGGTAATTCCAGCTCCAATAGCGTATATTAAACTTGTTGCAGTTAAAAAGCTCGTAGTTGAATTTCTGCGTTATCGAGTTATTGACTCTTGTCTTTAATCGATTTCGCTTTTGGGATTTATCCCTTTTTACTTTGAGAAAATTAGAGTGTTTCAAGCAGACTTTTGTCTTGAATACTTCAGCATGGAATAATAGAGTAGGACTTTGGTTCTATTTTGTTGGTTTTTGAACCTTAGTAATGGTTAATAGGAACGGTTGGGGGCATTCGTATT
TTPP1426	Netherlands	Ixodes ricinus	2013	Babesia venatorum	no ambiguous nucleotides	GATGGTGACCTAAACCCTCACCAGAGTAACAATTGGAGGGCAAGTCTGGTGCCAGCAGCCGCGGTAATTCCAGCTCCAATAGCGTATATTAAACTTGTTGCAGTTAAAAAGCTCGTAGTTGAATTTCTGCGTTATCGAGTTATTGACTCTTGTCTTTAATCGATTTCGCTTTTGGGATTTATCCCTTTTTACTTTGAGAAAATTAGAGTGTTTCAAGCAGACTTTTGTCTTGAATACTTCAGCATGGAATAATAGAGTAGGACTTTGGTTCTATTTTGTTGGTTTTTGAACCTTAGTAATGGTTAATAGGAACGGTTGGGGGCATTCGTATT
242BST	Netherlands	Ixodes ricinus	2017	Babesia venatorum	no ambiguous nucleotides	AAATAACAATACAGGGCAATTGTCTTGTAATTGGAATGATGGTGACCTAAACCCTCACCAGAGTAACAATTGGAGGGCAAGTCTGGTGCCAGCAGCCGCGGTAATTCCAGCTCCAATAGCGTATATTAAACTTGTTGCAGTTAAAAAGCTCGTAGTTGAATTTCTGCGTTATCGAGTTATTGACTCTTGTCTTTAATCGATTTCGCTTTTGGGATTTATCCCTTTTTACTTTGAGAAAATTAGAGTGTTTCAAGCAGACTTTTGTCTTGAATACTTCAGCATGGAATAATAGAGTAGGACTTTGGTTCTATTTTGTTGGTTTTTGAACCTTAGT
990FST	Netherlands	Ixodes ricinus	2017	Babesia venatorum	no ambiguous nucleotides	AAATAACAATACAGGGCAATTGTCTTGTAATTGGAATGATGGTGACCTAAACCCTCACCAGAGTAACAATTGGAGGGCAAGTCTGGTGCCAGCAGCCGCGGTAATTCCAGCTCCAATAGCGTATATTAAACTTGTTGCAGTTAAAAAGCTCGTAGTTGAATTTCTGCGTTATCGAGTTATTGACTCTTGTCTTTAATCGATTTCGCTTTTGGGATTTATCCCTTTTTACTTTGAGAAAATTAGAGTGTTTCAAGCAGACTTTTGTCTTGAATACTTCAGCATGGAATAATAGAGTAGGACTTTGGTTCTATTTTGTTGGTTTTTGAACCTTAGTAAT
1760HST	Netherlands	Ixodes ricinus	2017	Babesia venatorum	no ambiguous nucleotides	GTCTTGTAATTGGAATGATGGTGACCTAAACCCTCACCAGAGTAACAATTGGAGGGCAAGTCTGGTGCCAGCAGCCGCGGTAATTCCAGCTCCAATAGCGTATATTAAACTTGTTGCAGTTAAAAAGCTCGTAGTTGAATTTCTGCGTTATCGAGTTATTGACTCTTGTCTTTAATCGATTTCGCTTTTGGGATTTATCCCTTTTTACTTTGAGAAAATTAGAGTGTTTCAAGCAGACTTTTGTCTTGAATACTTCAGCATGGAATAATAGAGTAGGACTTTGGTTCTATTTTGTTGGTTTTTGAACCTTAGTAAT
RJSheep00397	Netherlands	Ovis aries	2017	Babesia venatorum	no ambiguous nucleotides	AAATAACAATACAGGGCAATTGTCTTGTAATTGGAATGATGGTGACCTAAACCCTCACCAGAGTAACAATTGGAGGGCAAGTCTGGTGCCAGCAGCCGCGGTAATTCCAGCTCCAATAGCGTATATTAAACTTGTTGCAGTTAAAAAGCTCGTAGTTGAATTTCTGCGTTATCGAGTTATTGACTCTTGTCTTTAATCGATTTCGCTTTTGGGATTTATCCCTTTTTACTTTGAGAAAATTAGAGTGTTTCAAGCAGACTTTTGTCTTGAATACTTCAGCATGGAATAATAGAGTAGGACTTTGGTTCTATTTTGTTGGTTTTTGAACCTTAGTAATGGTTAATAGGAACGGTTGGGGGCATTCGTATT
RJSheep18225	Netherlands	Ovis aries	2017	Babesia venatorum	no ambiguous nucleotides	AAATAACAATACAGGGCAATTGTCTTGTAATTGGAATGATGGTGACCTAAACCCTCACCAGAGTAACAATTGGAGGGCAAGTCTGGTGCCAGCAGCCGCGGTAATTCCAGCTCCAATAGCGTATATTAAACTTGTTGCAGTTAAAAAGCTCGTAGTTGAATTTCTGCGTTATCGAGTTATTGACTCTTGTCTTTAATCGATTTCGCTTTTGGGATTTATCCCTTTTTACTTTGAGAAAATTAGAGTGTTTCAAGCAGACTTTTGTCTTGAATACTTCAGCATGGAATAATAGAGTAGGACTTTGGTTCTATTTTGTTGGTTTTTGAACCTTAGTAATGGTTAATAGGAACGGTTGGGGGCATTCGTATT
sheep72	Netherlands	Ovis aries	2017	Babesia venatorum	no ambiguous nucleotides	AAATAACAATACAGGGCAATTGTCTTGTAATTGGAATGATGGTGACCTAAACCCTCACCAGAGTAACAATTGGAGGGCAAGTCTGGTGCCAGCAGCCGCGGTAATTCCAGCTCCAATAGCGTATATTAAACTTGTTGCAGTTAAAAAGCTCGTAGTTGAATTTCTGCGTTATCGAGTTATTGACTCTTGTCTTTAATCGATTTCGCTTTTGGGATTTATCCCTTTTTACTTTGAGAAAATTAGAGTGTTTCAAGCAGACTTTTGTCTTGAATACTTCAGCATGGAATAATAGAGTAGGACTTTGGTTCTATTTTGTTGGTTTTTGAACCTTAGTAATGGTTAATAGGAACGGTTGGGGGCATTCGTATT
107CBU	Netherlands	Ixodes ricinus	2017	Babesia venatorum	ambiguous nucleotides	AAATAACAATACAGGGCAATTGTCTTGTAATTGGAATGATGGTGACCTAAACCCTCACCAGAGTAACAATTGGAGGGCAAGTCTGGTGCCAGCAGCCGCGGTAATTCCAGCTCCAATAGCGTATATTAAACTTGTTGCAGTTAAAAAGCTCGTAGTTGAATTTCTGCGTTATCGRGTTATTGACTCTTGTCTTTAATCGATTTCGCTTTTGGGATTTATCCCTTTTTACTTTGAGAAAATTAGAGTGTTTCAAGCAGACTTTTGTCTTGAATACTTCAGCATGGAATAATAGAGTAGGACTTTGGTTCTATTTTGTTGGTTTTTGAACCTTAGTAATGGTTAATAGGAACGGTTGGGGGCATTCGTATT
157EST	Netherlands	Ixodes ricinus	2017	Babesia venatorum	ambiguous nucleotides	AAATAACAATACAGGGCAATTGTCTTGTAATTGGAATGATGGTGACCTAAACCCTCACCAGAGTAACAATTGGAGGGCAAGTCTGGTGCCAGCAGCCGCGGTAATTCCAGCTCCAATAGCGTATATTAAACTTGTTGCAGTTAAAAAGCTCGTAGTTGAATTTCTGCGTTATCGAGTTATTGACTCTTGTCTTTAATCGATTTCGCTTYTGGGATTTATCCCTTTTTACTTTGAGAAAATTAGAGTGTTTCAAGCAGACTTTTGTCTTGAATACTTCAGCATGGAATAATAGAGTAGGACTTTGGTTCTATTTTGTTGGTTTTTGAACCTTAGTAATGGTTAATAGGAACGGTTGGGGGCATTCGTATT
RJ1166	Netherlands	Ixodes ricinus	2013	Babesia venatorum	ambiguous nucleotides	AAATAACAATACAGGGCAATTGTCTTGTAATTGGAATGATGGTGACCTAAACCCTCACCAGAGTAACAATTGGAGGGCAAGTCTGGTGCCAGCAGCCGCGGTAATTCCAGCTCCAATAGCGTATATTAAACTTGTTGCAGTTAAAAAGCTCGTAGTTGAATTTCTGCGTTATCGAGTTATTGACTCTTGTCTTTAATCGATTTCGCTTYTGGGATTTATCCCTTTTTACTTTGAGAAAATTAGAGTGTTTCAAGCAGACTTTTGTCTTGAATACTTCAGCATGGAATAATAGAGTAGGACTTTGGTTCTATTTTGTTGGTTTTTGAACCTTAGTAATGGTTAATAGGAACGGTTGGGGGCATTCGTATT
RJ2579	Netherlands	Ixodes ricinus	2013	Babesia venatorum	ambiguous nucleotides	AAATAACAATACAGGGCAATTGTCTTGTAATTGGAATGATGGTGACCTAAACCCTCACCAGAGTAACAATTGGAGGGCAAGTCTGGTGCCAGCAGCCGCGGTAATTCCAGCTCCAATAGCGTATATTAAACTTGTTGCAGTTAAAAAGCTCGTAGTTGAATTTCTGCGTTATCGAGTTATTGACTCYTGTCTTTAATCGATTTCGCTTTTGGGATTTATCCCTTTTTACTTTGAGAAAATTAGAGTGTTTCAAGCAGACTTTTGTCTTGAATACTTCAGCATGGAATAATAGAGTAGGACTTTGGTTCTATTTTGTTGGTTTTTGAACCTTAGTAATGGTTAATAGGAACGGTTGGGGGCATTCGTATT
RJ7107	Netherlands	Ixodes ricinus	2015	Babesia venatorum	ambiguous nucleotides	AAATAACAATACAGGGCAATTGTCTTGTAATTGGAATGATGGTGACCTAAACCCTCACCAGAGTAACAATTGGAGGGCAAGTCTGGTGCCAGCAGCCGCGGTAATTCCAGCTCCAATAGCGTATATTAAACTTGTTGCAGTTAAAAAGCTCGTAGTTGAATTTCTGCGTTATCGAGTTATTGACTCTTGTCTTTAATCGATTTCGCTTYTGGGATTTATCCCTTTTTACTTTGAGAAAATTAGAGTGTTTCAAGCAGACTTTTGTCTTGAATACTTCAGCATGGAATAATAGAGTAGGACTTTGGTTCTATTTTGTTGGTTTTTGAACCTTAGTAATGGTTAATAGGAACGGTTGGGGGCATTCGTATT
TR2256	Netherlands	Ixodes ricinus	2012	Babesia venatorum	ambiguous nucleotides	AAATAACAATACAGGGCAATTGTCTTGTAATTGGAATGATGGTGACCTAAACCCTCACCAGAGTAACAATTGGAGGGCAAGTCTGGTGCCAGCAGCCGCGGTAATTCCAGCTCCAATAGCGTATATTAAACTTGTTGCAGTTAAAAAGCTCGTAGTTGAATTTCTGCGTTATCGAGTTATTGACTCYTGTCTTTAATCGATTTCGCTTTTGGGATTTATCCCTTTTTACTTTGAGAAAATTAGAGTGTTTCAAGCAGACTTTTGTCTTGAATACTTCAGCATGGAATAATAGAGTAGGACTTTGGTTCTATTTTGTTGGTTTTTGAACCTTAGTAATGGTTAATAGGAACGGTTGGGGGCATTCGTATT
TR486	Netherlands	Ixodes ricinus	2012	Babesia venatorum	ambiguous nucleotides	AAATAACAATACAGGGCAATTGTCTTGTAATTGGAATGATGGTGACCTAAACCCTCACCAGAGTAACAATTGGAGGGCAAGTCTGGTGCCAGCAGCCGCGGTAATTCCAGCTCCAATAGCGTATATTAAACTTGTTGCAGTTAAAAAGCTCGTAGTTGAATTTCTGCGTTATCGAGTTATTGACTCYTGTCTTTAATCGATTTCGCTTTTGGGATTTATCCCTTTTTACTTTGAGAAAATTAGAGTGTTTCAAGCAGACTTTTGTCTTGAATACTTCAGCATGGAATAATAGAGTAGGACTTTGGTTCTATTTTGTTGGTTTTTGAACCTTAGTAATGGTTAATAGGAACGGTTGGGGGCATTCGTATT
TR876	Netherlands	Ixodes ricinus	2012	Babesia venatorum	ambiguous nucleotides	AAATAACAATACAGGGCAATTGTCTTGTAATTGGAATGATGGTGACCTAAACCCTCACCAGAGTAACAATTGGAGGGCAAGTCTGGTGCCAGCAGCCGCGGTAATTCCAGCTCCAATAGCGTATATTAAACTTGTTGCAGTTAAAAAGCTCGTAGTTGAATTTCTGCGTTATCGRGTTATTGACTCTTGTCTTTAATCGATTTCGCTTTTGGGATTTATCCCTTTTTACTTTGAGAAAATTAGAGTGTTTCAAGCAGACTTTTGTCTTGAATACTTCAGCATGGAATAATAGAGTAGGACTTTGGTTCTATTTTGTTGGTTTTTGAACCTTAGTAATGGTTAATAGGAACGGTTGGGGGCATTCGTATT
TTPP67	Netherlands	Ixodes ricinus	2013	Babesia venatorum	ambiguous nucleotides	AAATAACAATACAGGGCAATTGTCTTGTAATTGGAATGATGGTGACCTAAACCCTCACCAGAGTAACAATTGGAGGGCAAGTCTGGTGCCAGCAGCCGCGGTAATTCCAGCTCCAATAGCGTATATTAAACTTGTTGCAGTTAAAAAGCTCGTAGTTGAATTTCTGCGTTATCGAGTTATTGACTCYTGTCTTTAATCGATTTCGCTTTTGGGATTTATCCCTTTTTACTTTGAGAAAATTAGAGTGTTTCAAGCAGACTTTTGTCTTGAATACTTCAGCATGGAATAATAGAGTAGGACTTTGGTTCTATTTTGTTGGTTTTTGAACCTTAGTAATGGTTAATAGGAACGGTTGGGGGCATTCGTATT
RJ7170	Netherlands	Ixodes ricinus	2015	Babesia venatorum	ambiguous nucleotides	AAATAACWATACAGGGCAATTGTCTYGTAATTGGAATGATGGTGACCTAAACCCTCACCAGAGTAACAATTGGAGGGCAAGTCTGGTGCCAGCAGCCGCGGTAATTCCAGCTCCAATAGCGTATATTAAACTTGTTGCAGTTAAAAAGCTCGTAGTTGAATTTCTGCGTTATCGAGTTATTGACTCTTGTCTTTAATCGATTTCGCTTTTGGGATTTATCCCTTTTTACTTTGAGAAAATTAGAGTGTTTCAAGCAGACTTTTGTCTTGAATACTTCAGCATGGAATAATAGAGTAGGACTTTGGTTCTATTTTGTTGGTTTTTGAACCTTAGTAATGGTTAATAGGAACGGTTGGGGGCATTCGTATT
TTPP1216	Netherlands	Ixodes ricinus	2013	Babesia venatorum	no ambiguous nucleotides	ATGATGGTGACCTAAACCCTCACCAGAGTAACAATTGGAGGGCAAGTCTGGTGCCAGCAGCCGCGGTAATTCCAGCTCCAATAGCGTATATTAAACTTGTTGCAGTTAAAAAGCTCGTAGTTGAATTTCTGCGTTATCGAGTTATTGACTCCTGTCTTTAATCGATTTCGCTTTTGGGATTTATCCCTTTTTACTTTGAGAAAATTAGAGTGTTTCAAGCAGACTTTTGTCTTGAATACTTCAGCATGGAATAATAGAGTAGGACTTTGGTTCTATTTTGTTGGTTTTTGAACCTTAGTAATGGTTAATAGGAACGGTTGGGGGCATTCGTATT
114BBU	Netherlands	Ixodes ricinus	2017	Babesia venatorum	no ambiguous nucleotides	TGTCTTGTAATTGGAATGATGGTGACCTAAACCCTCACCAGAGTAACAATTGGAGGGCAAGTCTGGTGCCAGCAGCCGCGGTAATTCCAGCTCCAATAGCGTATATTAAACTTGTTGCAGTTAAAAAGCTCGTAGTTGAATTTCTGCGTTATCGGGTTATTGACTCTTGTCTTTAATCGATTTCGCTTTTGGGATTTATCCCTTTTTACTTTGAGAAAATTAGAGTGTTTCAAGCAGACTTTTGTCTTGAATACTTCAGCATGGAATAATAGAGTAGGACTTTGGTTCTATTTTGTTGGTTTTTGAACCTTAGTAATGGTTAATAGGAACGGTTGGGGGCATTCGTATT
RJ3124	Netherlands	Ixodes ricinus	2013	Babesia venatorum	ambiguous nucleotides	AAATAACAATACAGGGCAATTGTCTTGTAATTGGAATGATGGTGACCTAAACCCTCACCAGAGTAACAATTGGAGGGCAAGTCTGGTGCCAGCAGCCGCGGTAATTCCAGCTCCAATAGCGTATATTAAACTTGTTGCAGTTAAAAAGCTCGTAGTTGAATTTCTGCGTTATCGAGTTATTGACTCTTGTCTTTAATCGATTTCGCTTTTGGGATTTATCCCTTTTTACTTTGAGAAAATTAGAGTGTTTCAAGCAGACTTTTGTCTTGAATACTTCAKCATGGAATAATAKAGTAGGACTTTGGTTCTATTTTGTTGGTTTTTGAACCT
1514BST	Netherlands	Ixodes ricinus	2017	Babesia venatorum	ambiguous nucleotides	TGGTGACCTAAACCCTCACCAGAGTAACAATTGGAGGGCAAGTSTGGTGCCAGCAGCCGCGGTAATTCCAGCTCCAATAGCGTATATTAAACTTGTTGCAGTTAAAAAGCTCGTAGTTGAATTTCTGCGTTATCGAGTTATTGACTCTTGTCTTTAATCGATTTCGCTTTTGGGATTTATCCCTTTTTACTTTGAGAAAATTAGAGTGTTTCAAGCAGACTTTTGTCTTGAATACTTCAGCATGGAATAATAGAGTAKGACTTTGGTTCTATTTT
RJ483	Netherlands	Ixodes ricinus	2012	Babesia venatorum	ambiguous nucleotides	TGACCTAAACCCTCACCAGAGTAACAATTGGAGGGCAAGTCTGGTGCCAGCAGCCGCGGTAATTCCAGCTCCAATAGCGTATATTAAACTTGTTGCAGTTAAAAAGCTCGTAGTTGAATTTCTGCGTTATCGAGTTATTGACTCTTGTCTTTAATCGATTTCGCTTTTGGGATTTATCCCTTTTTACTTTGAGAAAATTAGAGTGTTTCAAGCAGACTTTTGTCTTGAATACTTCAGCATGGAATAATAGAGTAGGACTTKGGTTCTATTTTGTTGGTTTKTGMACCTTAGTAATGGTTAATAGGAA
KF447532	Netherlands	Ixodes ricinus		Babesia venatorum	no ambiguous nucleotides	TGTCTTGTATTGGATGATGGTGACCTAAACCCTCACCAGAGTAACAATTGGAGGGCAAGTCTGGTGCCAGCAGCCGCGGTAATTCCAGCTCCAATAGCGTATATTAAACTTGTTGCAGTTAAAAAGCTCGTAGTTGAATTTCTGCGTTATCGAGTTATTGACTCTTGTCTTTAATCGATTTCGCTTTTGGGATTTATCCCTTTTTACTTTGAGAAAATTAGAGTGTTTCAAGCAGACTTTTGTCTTGAATACTTCAGCATGGAATAATAGAGTAGGACTTTGGTTCTATTTTGTTGGTTTTTGAACCTTAGTAATGGTTAATAGGAACGGTTGGGGGCATTCGTA
TTPP348	Netherlands	Ixodes ricinus	2013	Babesia venatorum	no ambiguous nucleotides	GTCTTGTATTGGATGATGGTGACCTAAACCCTCACCAGAGTAACAATTGGAGGGCAAGTCTGGTGCCAGCAGCCGCGGTAATTCCAGCTCCAATAGCGTATATTAAACTTGTTGCAGTTAAAAAGCTCGTAGTTGAATTTCTGCGTTATCGAGTTATTGACTCTTGTCTTTAATCGATTTCGCTTTTGGGATTTATCCCTTTTTACTTTGAGAAAATTAGAGTGTTTCAAGCAGACTTTTGTCTTGAATACTTCAGCATGGAATAATAGAGTAGGACTTTGGTTCTATTTTGTTGGTTTTTGAACCTTAGTAATGGTTAATAGGAACGGTTGGGGGCATTCGTATT
TR1619	Netherlands	Ixodes ricinus	2012	Babesia venatorum	no ambiguous nucleotides	TGTCTTGTATTGGATGATGGTGACCTAAACCCTCACCAGAGTAACAATTGGAGGGCAAGTCTGGTGCCAGCAGCCGCGGTAATTCCAGCTCCAATAGCGTATATTAAACTTGTTGCAGTTAAAAAGCTCGTAGTTGAATTTCTGCGTTATCGAGTTATTGACTCTTGTCTTTAATCGATTTCGCTTTTGGGATTTATCCCTTTTTACTTTGAGAAAATTAGAGTGTTTCAAGCAGACTTTTGTCTTGAATACTTCAGCATGGAATAATAGAGTAGGACTTTGGTTCTATTTTGTTGGTTTTTGAACCTTAGTAATGGTTAATAGGAACGGTTGGGGGCATTCGTATT
TTPP1364	Netherlands	Ixodes ricinus	2013	Babesia venatorum	no ambiguous nucleotides	TGTCTTGTATTGGATGATGGTGACCTAAACCCTCACCAGAGTAACAATTGGAGGGCAAGTCTGGTGCCAGCAGCCGCGGTAATTCCAGCTCCAATAGCGTATATTAAACTTGTTGCAGTTAAAAAGCTCGTAGTTGAATTTCTGCGTTATCGAGTTATTGACTCTTGTCTTTAATCGATTTCGCTTTTGGGATTTATCCCTTTTTACTTTGAGAAAATTAGAGTGTTTCAAGCAGACTTTTGTCTTGAATACTTCAGCATGGAATAATAGAGTAGGACTTTGGTTCTATTTTGTTGGTTTTTGAACCTTAGTAATGGTTAATAGGAACGGTTGGGGGCATTCGTATT
TTPP863	Netherlands	Ixodes ricinus	2013	Babesia venatorum	no ambiguous nucleotides	TGTCTTGTATTGGATGATGGTGACCTAAACCCTCACCAGAGTAACAATTGGAGGGCAAGTCTGGTGCCAGCAGCCGCGGTAATTCCAGCTCCAATAGCGTATATTAAACTTGTTGCAGTTAAAAAGCTCGTAGTTGAATTTCTGCGTTATCGAGTTATTGACTCTTGTCTTTAATCGATTTCGCTTTTGGGATTTATCCCTTTTTACTTTGAGAAAATTAGAGTGTTTCAAGCAGACTTTTGTCTTGAATACTTCAGCATGGAATAATAGAGTAGGACTTTGGTTCTATTTTGTTGGTTTTTGAACCTTAGTAATGGTTAATAGGAACGGTTGGGGGCATTCGTATT
BegrazingTeek514	Netherlands	Ixodes ricinus		Babesia venatorum		TTGTCTTGTATTGGATGATGGTGACCTAAACCCTCACCAGAGTAACAATTGGAGGGCAAGTCTGGTGCCAGCAGCCGCGGTAATTCCAGCTCCAATAGCGTATATTAAACTTGTTGCAGTTAAAAAGCTCGTAGTTGAATTTCTGCGTTATCGAGTTATTGACTCTTGTCTTTAATCGATTTCGCTTTTGGGATTTATCCCTTTTTACTTTGAGAAAATTAGAGTGTTTCAAGCAGACTTTTGTCTTGAATACTTCAGCATGGAATAATAGAGTAGGACTTTGGTTCTATTTTGTTGGTTTTTGAACCTTAGTAATGGTTAATAGGAACGGTTGGGGGCATTCGTATT
TR1025	Netherlands	Ixodes ricinus	2012	Babesia venatorum	no ambiguous nucleotides	TTGTCTTGTATTGGATGATGGTGACCTAAACCCTCACCAGAGTAACAATTGGAGGGCAAGTCTGGTGCCAGCAGCCGCGGTAATTCCAGCTCCAATAGCGTATATTAAACTTGTTGCAGTTAAAAAGCTCGTAGTTGAATTTCTGCGTTATCGAGTTATTGACTCTTGTCTTTAATCGATTTCGCTTTTGGGATTTATCCCTTTTTACTTTGAGAAAATTAGAGTGTTTCAAGCAGACTTTTGTCTTGAATACTTCAGCATGGAATAATAGAGTAGGACTTTGGTTCTATTTTGTTGGTTTTTGAACCTTAGTAATGGTTAATAGGAACGGTTGGGGGCATTCGTATT
TR1129	Netherlands	Ixodes ricinus	2012	Babesia venatorum	no ambiguous nucleotides	TTGTCTTGTATTGGATGATGGTGACCTAAACCCTCACCAGAGTAACAATTGGAGGGCAAGTCTGGTGCCAGCAGCCGCGGTAATTCCAGCTCCAATAGCGTATATTAAACTTGTTGCAGTTAAAAAGCTCGTAGTTGAATTTCTGCGTTATCGAGTTATTGACTCTTGTCTTTAATCGATTTCGCTTTTGGGATTTATCCCTTTTTACTTTGAGAAAATTAGAGTGTTTCAAGCAGACTTTTGTCTTGAATACTTCAGCATGGAATAATAGAGTAGGACTTTGGTTCTATTTTGTTGGTTTTTGAACCTTAGTAATGGTTAATAGGAACGGTTGGGGGCATTCGTATT
TR1161	Netherlands	Ixodes ricinus	2012	Babesia venatorum	no ambiguous nucleotides	TTGTCTTGTATTGGATGATGGTGACCTAAACCCTCACCAGAGTAACAATTGGAGGGCAAGTCTGGTGCCAGCAGCCGCGGTAATTCCAGCTCCAATAGCGTATATTAAACTTGTTGCAGTTAAAAAGCTCGTAGTTGAATTTCTGCGTTATCGAGTTATTGACTCTTGTCTTTAATCGATTTCGCTTTTGGGATTTATCCCTTTTTACTTTGAGAAAATTAGAGTGTTTCAAGCAGACTTTTGTCTTGAATACTTCAGCATGGAATAATAGAGTAGGACTTTGGTTCTATTTTGTTGGTTTTTGAACCTTAGTAATGGTTAATAGGAACGGTTGGGGGCATTCGTATT
TR1737	Netherlands	Ixodes ricinus	2012	Babesia venatorum	no ambiguous nucleotides	TTGTCTTGTATTGGATGATGGTGACCTAAACCCTCACCAGAGTAACAATTGGAGGGCAAGTCTGGTGCCAGCAGCCGCGGTAATTCCAGCTCCAATAGCGTATATTAAACTTGTTGCAGTTAAAAAGCTCGTAGTTGAATTTCTGCGTTATCGAGTTATTGACTCTTGTCTTTAATCGATTTCGCTTTTGGGATTTATCCCTTTTTACTTTGAGAAAATTAGAGTGTTTCAAGCAGACTTTTGTCTTGAATACTTCAGCATGGAATAATAGAGTAGGACTTTGGTTCTATTTTGTTGGTTTTTGAACCTTAGTAATGGTTAATAGGAACGGTTGGGGGCATTCGTATT
TR1800	Netherlands	Ixodes ricinus	2012	Babesia venatorum	no ambiguous nucleotides	TTGTCTTGTATTGGATGATGGTGACCTAAACCCTCACCAGAGTAACAATTGGAGGGCAAGTCTGGTGCCAGCAGCCGCGGTAATTCCAGCTCCAATAGCGTATATTAAACTTGTTGCAGTTAAAAAGCTCGTAGTTGAATTTCTGCGTTATCGAGTTATTGACTCTTGTCTTTAATCGATTTCGCTTTTGGGATTTATCCCTTTTTACTTTGAGAAAATTAGAGTGTTTCAAGCAGACTTTTGTCTTGAATACTTCAGCATGGAATAATAGAGTAGGACTTTGGTTCTATTTTGTTGGTTTTTGAACCTTAGTAATGGTTAATAGGAACGGTTGGGGGCATTCGTATT
TR1829	Netherlands	Ixodes ricinus	2012	Babesia venatorum	no ambiguous nucleotides	TTGTCTTGTATTGGATGATGGTGACCTAAACCCTCACCAGAGTAACAATTGGAGGGCAAGTCTGGTGCCAGCAGCCGCGGTAATTCCAGCTCCAATAGCGTATATTAAACTTGTTGCAGTTAAAAAGCTCGTAGTTGAATTTCTGCGTTATCGAGTTATTGACTCTTGTCTTTAATCGATTTCGCTTTTGGGATTTATCCCTTTTTACTTTGAGAAAATTAGAGTGTTTCAAGCAGACTTTTGTCTTGAATACTTCAGCATGGAATAATAGAGTAGGACTTTGGTTCTATTTTGTTGGTTTTTGAACCTTAGTAATGGTTAATAGGAACGGTTGGGGGCATTCGTATT
TR1840	Netherlands	Ixodes ricinus	2012	Babesia venatorum	no ambiguous nucleotides	TTGTCTTGTATTGGATGATGGTGACCTAAACCCTCACCAGAGTAACAATTGGAGGGCAAGTCTGGTGCCAGCAGCCGCGGTAATTCCAGCTCCAATAGCGTATATTAAACTTGTTGCAGTTAAAAAGCTCGTAGTTGAATTTCTGCGTTATCGAGTTATTGACTCTTGTCTTTAATCGATTTCGCTTTTGGGATTTATCCCTTTTTACTTTGAGAAAATTAGAGTGTTTCAAGCAGACTTTTGTCTTGAATACTTCAGCATGGAATAATAGAGTAGGACTTTGGTTCTATTTTGTTGGTTTTTGAACCTTAGTAATGGTTAATAGGAACGGTTGGGGGCATTCGTATT
TR1882	Netherlands	Ixodes ricinus	2012	Babesia venatorum	no ambiguous nucleotides	TTGTCTTGTATTGGATGATGGTGACCTAAACCCTCACCAGAGTAACAATTGGAGGGCAAGTCTGGTGCCAGCAGCCGCGGTAATTCCAGCTCCAATAGCGTATATTAAACTTGTTGCAGTTAAAAAGCTCGTAGTTGAATTTCTGCGTTATCGAGTTATTGACTCTTGTCTTTAATCGATTTCGCTTTTGGGATTTATCCCTTTTTACTTTGAGAAAATTAGAGTGTTTCAAGCAGACTTTTGTCTTGAATACTTCAGCATGGAATAATAGAGTAGGACTTTGGTTCTATTTTGTTGGTTTTTGAACCTTAGTAATGGTTAATAGGAACGGTTGGGGGCATTCGTATT
TR1903	Netherlands	Ixodes ricinus	2012	Babesia venatorum	no ambiguous nucleotides	TTGTCTTGTATTGGATGATGGTGACCTAAACCCTCACCAGAGTAACAATTGGAGGGCAAGTCTGGTGCCAGCAGCCGCGGTAATTCCAGCTCCAATAGCGTATATTAAACTTGTTGCAGTTAAAAAGCTCGTAGTTGAATTTCTGCGTTATCGAGTTATTGACTCTTGTCTTTAATCGATTTCGCTTTTGGGATTTATCCCTTTTTACTTTGAGAAAATTAGAGTGTTTCAAGCAGACTTTTGTCTTGAATACTTCAGCATGGAATAATAGAGTAGGACTTTGGTTCTATTTTGTTGGTTTTTGAACCTTAGTAATGGTTAATAGGAACGGTTGGGGGCATTCGTATT
TR216	Netherlands	Ixodes ricinus	2012	Babesia venatorum	no ambiguous nucleotides	TTGTCTTGTATTGGATGATGGTGACCTAAACCCTCACCAGAGTAACAATTGGAGGGCAAGTCTGGTGCCAGCAGCCGCGGTAATTCCAGCTCCAATAGCGTATATTAAACTTGTTGCAGTTAAAAAGCTCGTAGTTGAATTTCTGCGTTATCGAGTTATTGACTCTTGTCTTTAATCGATTTCGCTTTTGGGATTTATCCCTTTTTACTTTGAGAAAATTAGAGTGTTTCAAGCAGACTTTTGTCTTGAATACTTCAGCATGGAATAATAGAGTAGGACTTTGGTTCTATTTTGTTGGTTTTTGAACCTTAGTAATGGTTAATAGGAACGGTTGGGGGCATTCGTATT
TR255	Netherlands	Ixodes ricinus	2012	Babesia venatorum	no ambiguous nucleotides	TTGTCTTGTATTGGATGATGGTGACCTAAACCCTCACCAGAGTAACAATTGGAGGGCAAGTCTGGTGCCAGCAGCCGCGGTAATTCCAGCTCCAATAGCGTATATTAAACTTGTTGCAGTTAAAAAGCTCGTAGTTGAATTTCTGCGTTATCGAGTTATTGACTCTTGTCTTTAATCGATTTCGCTTTTGGGATTTATCCCTTTTTACTTTGAGAAAATTAGAGTGTTTCAAGCAGACTTTTGTCTTGAATACTTCAGCATGGAATAATAGAGTAGGACTTTGGTTCTATTTTGTTGGTTTTTGAACCTTAGTAATGGTTAATAGGAACGGTTGGGGGCATTCGTATT
TTPP1025	Netherlands	Ixodes ricinus	2013	Babesia venatorum	no ambiguous nucleotides	TTGTCTTGTATTGGATGATGGTGACCTAAACCCTCACCAGAGTAACAATTGGAGGGCAAGTCTGGTGCCAGCAGCCGCGGTAATTCCAGCTCCAATAGCGTATATTAAACTTGTTGCAGTTAAAAAGCTCGTAGTTGAATTTCTGCGTTATCGAGTTATTGACTCTTGTCTTTAATCGATTTCGCTTTTGGGATTTATCCCTTTTTACTTTGAGAAAATTAGAGTGTTTCAAGCAGACTTTTGTCTTGAATACTTCAGCATGGAATAATAGAGTAGGACTTTGGTTCTATTTTGTTGGTTTTTGAACCTTAGTAATGGTTAATAGGAACGGTTGGGGGCATTCGTATT
TTPP1026	Netherlands	Ixodes ricinus	2013	Babesia venatorum	no ambiguous nucleotides	TTGTCTTGTATTGGATGATGGTGACCTAAACCCTCACCAGAGTAACAATTGGAGGGCAAGTCTGGTGCCAGCAGCCGCGGTAATTCCAGCTCCAATAGCGTATATTAAACTTGTTGCAGTTAAAAAGCTCGTAGTTGAATTTCTGCGTTATCGAGTTATTGACTCTTGTCTTTAATCGATTTCGCTTTTGGGATTTATCCCTTTTTACTTTGAGAAAATTAGAGTGTTTCAAGCAGACTTTTGTCTTGAATACTTCAGCATGGAATAATAGAGTAGGACTTTGGTTCTATTTTGTTGGTTTTTGAACCTTAGTAATGGTTAATAGGAACGGTTGGGGGCATTCGTATT
TTPP1078	Netherlands	Ixodes ricinus	2013	Babesia venatorum	no ambiguous nucleotides	TTGTCTTGTATTGGATGATGGTGACCTAAACCCTCACCAGAGTAACAATTGGAGGGCAAGTCTGGTGCCAGCAGCCGCGGTAATTCCAGCTCCAATAGCGTATATTAAACTTGTTGCAGTTAAAAAGCTCGTAGTTGAATTTCTGCGTTATCGAGTTATTGACTCTTGTCTTTAATCGATTTCGCTTTTGGGATTTATCCCTTTTTACTTTGAGAAAATTAGAGTGTTTCAAGCAGACTTTTGTCTTGAATACTTCAGCATGGAATAATAGAGTAGGACTTTGGTTCTATTTTGTTGGTTTTTGAACCTTAGTAATGGTTAATAGGAACGGTTGGGGGCATTCGTATT
TTPP1221	Netherlands	Ixodes ricinus	2013	Babesia venatorum	no ambiguous nucleotides	TTGTCTTGTATTGGATGATGGTGACCTAAACCCTCACCAGAGTAACAATTGGAGGGCAAGTCTGGTGCCAGCAGCCGCGGTAATTCCAGCTCCAATAGCGTATATTAAACTTGTTGCAGTTAAAAAGCTCGTAGTTGAATTTCTGCGTTATCGAGTTATTGACTCTTGTCTTTAATCGATTTCGCTTTTGGGATTTATCCCTTTTTACTTTGAGAAAATTAGAGTGTTTCAAGCAGACTTTTGTCTTGAATACTTCAGCATGGAATAATAGAGTAGGACTTTGGTTCTATTTTGTTGGTTTTTGAACCTTAGTAATGGTTAATAGGAACGGTTGGGGGCATTCGTATT
TTPP128	Netherlands	Ixodes ricinus	2013	Babesia venatorum	no ambiguous nucleotides	TTGTCTTGTATTGGATGATGGTGACCTAAACCCTCACCAGAGTAACAATTGGAGGGCAAGTCTGGTGCCAGCAGCCGCGGTAATTCCAGCTCCAATAGCGTATATTAAACTTGTTGCAGTTAAAAAGCTCGTAGTTGAATTTCTGCGTTATCGAGTTATTGACTCTTGTCTTTAATCGATTTCGCTTTTGGGATTTATCCCTTTTTACTTTGAGAAAATTAGAGTGTTTCAAGCAGACTTTTGTCTTGAATACTTCAGCATGGAATAATAGAGTAGGACTTTGGTTCTATTTTGTTGGTTTTTGAACCTTAGTAATGGTTAATAGGAACGGTTGGGGGCATTCGTATT
TTPP1326	Netherlands	Ixodes ricinus	2013	Babesia venatorum	no ambiguous nucleotides	TTGTCTTGTATTGGATGATGGTGACCTAAACCCTCACCAGAGTAACAATTGGAGGGCAAGTCTGGTGCCAGCAGCCGCGGTAATTCCAGCTCCAATAGCGTATATTAAACTTGTTGCAGTTAAAAAGCTCGTAGTTGAATTTCTGCGTTATCGAGTTATTGACTCTTGTCTTTAATCGATTTCGCTTTTGGGATTTATCCCTTTTTACTTTGAGAAAATTAGAGTGTTTCAAGCAGACTTTTGTCTTGAATACTTCAGCATGGAATAATAGAGTAGGACTTTGGTTCTATTTTGTTGGTTTTTGAACCTTAGTAATGGTTAATAGGAACGGTTGGGGGCATTCGTATT
TTPP1357	Netherlands	Ixodes ricinus	2013	Babesia venatorum	no ambiguous nucleotides	TTGTCTTGTATTGGATGATGGTGACCTAAACCCTCACCAGAGTAACAATTGGAGGGCAAGTCTGGTGCCAGCAGCCGCGGTAATTCCAGCTCCAATAGCGTATATTAAACTTGTTGCAGTTAAAAAGCTCGTAGTTGAATTTCTGCGTTATCGAGTTATTGACTCTTGTCTTTAATCGATTTCGCTTTTGGGATTTATCCCTTTTTACTTTGAGAAAATTAGAGTGTTTCAAGCAGACTTTTGTCTTGAATACTTCAGCATGGAATAATAGAGTAGGACTTTGGTTCTATTTTGTTGGTTTTTGAACCTTAGTAATGGTTAATAGGAACGGTTGGGGGCATTCGTATT
TTPP147	Netherlands	Ixodes ricinus	2013	Babesia venatorum	no ambiguous nucleotides	TTGTCTTGTATTGGATGATGGTGACCTAAACCCTCACCAGAGTAACAATTGGAGGGCAAGTCTGGTGCCAGCAGCCGCGGTAATTCCAGCTCCAATAGCGTATATTAAACTTGTTGCAGTTAAAAAGCTCGTAGTTGAATTTCTGCGTTATCGAGTTATTGACTCTTGTCTTTAATCGATTTCGCTTTTGGGATTTATCCCTTTTTACTTTGAGAAAATTAGAGTGTTTCAAGCAGACTTTTGTCTTGAATACTTCAGCATGGAATAATAGAGTAGGACTTTGGTTCTATTTTGTTGGTTTTTGAACCTTAGTAATGGTTAATAGGAACGGTTGGGGGCATTCGTATT
TTPP1501	Netherlands	Ixodes ricinus	2013	Babesia venatorum	no ambiguous nucleotides	TTGTCTTGTATTGGATGATGGTGACCTAAACCCTCACCAGAGTAACAATTGGAGGGCAAGTCTGGTGCCAGCAGCCGCGGTAATTCCAGCTCCAATAGCGTATATTAAACTTGTTGCAGTTAAAAAGCTCGTAGTTGAATTTCTGCGTTATCGAGTTATTGACTCTTGTCTTTAATCGATTTCGCTTTTGGGATTTATCCCTTTTTACTTTGAGAAAATTAGAGTGTTTCAAGCAGACTTTTGTCTTGAATACTTCAGCATGGAATAATAGAGTAGGACTTTGGTTCTATTTTGTTGGTTTTTGAACCTTAGTAATGGTTAATAGGAACGGTTGGGGGCATTCGTATT
TTPP1603	Netherlands	Ixodes ricinus	2013	Babesia venatorum	no ambiguous nucleotides	TTGTCTTGTATTGGATGATGGTGACCTAAACCCTCACCAGAGTAACAATTGGAGGGCAAGTCTGGTGCCAGCAGCCGCGGTAATTCCAGCTCCAATAGCGTATATTAAACTTGTTGCAGTTAAAAAGCTCGTAGTTGAATTTCTGCGTTATCGAGTTATTGACTCTTGTCTTTAATCGATTTCGCTTTTGGGATTTATCCCTTTTTACTTTGAGAAAATTAGAGTGTTTCAAGCAGACTTTTGTCTTGAATACTTCAGCATGGAATAATAGAGTAGGACTTTGGTTCTATTTTGTTGGTTTTTGAACCTTAGTAATGGTTAATAGGAACGGTTGGGGGCATTCGTATT
TTPP1666	Netherlands	Ixodes ricinus	2013	Babesia venatorum	no ambiguous nucleotides	TTGTCTTGTATTGGATGATGGTGACCTAAACCCTCACCAGAGTAACAATTGGAGGGCAAGTCTGGTGCCAGCAGCCGCGGTAATTCCAGCTCCAATAGCGTATATTAAACTTGTTGCAGTTAAAAAGCTCGTAGTTGAATTTCTGCGTTATCGAGTTATTGACTCTTGTCTTTAATCGATTTCGCTTTTGGGATTTATCCCTTTTTACTTTGAGAAAATTAGAGTGTTTCAAGCAGACTTTTGTCTTGAATACTTCAGCATGGAATAATAGAGTAGGACTTTGGTTCTATTTTGTTGGTTTTTGAACCTTAGTAATGGTTAATAGGAACGGTTGGGGGCATTCGTATT
TTPP1733	Netherlands	Ixodes ricinus	2013	Babesia venatorum	no ambiguous nucleotides	TTGTCTTGTATTGGATGATGGTGACCTAAACCCTCACCAGAGTAACAATTGGAGGGCAAGTCTGGTGCCAGCAGCCGCGGTAATTCCAGCTCCAATAGCGTATATTAAACTTGTTGCAGTTAAAAAGCTCGTAGTTGAATTTCTGCGTTATCGAGTTATTGACTCTTGTCTTTAATCGATTTCGCTTTTGGGATTTATCCCTTTTTACTTTGAGAAAATTAGAGTGTTTCAAGCAGACTTTTGTCTTGAATACTTCAGCATGGAATAATAGAGTAGGACTTTGGTTCTATTTTGTTGGTTTTTGAACCTTAGTAATGGTTAATAGGAACGGTTGGGGGCATTCGTATT
TTPP1833	Netherlands	Ixodes ricinus	2013	Babesia venatorum	no ambiguous nucleotides	TTGTCTTGTATTGGATGATGGTGACCTAAACCCTCACCAGAGTAACAATTGGAGGGCAAGTCTGGTGCCAGCAGCCGCGGTAATTCCAGCTCCAATAGCGTATATTAAACTTGTTGCAGTTAAAAAGCTCGTAGTTGAATTTCTGCGTTATCGAGTTATTGACTCTTGTCTTTAATCGATTTCGCTTTTGGGATTTATCCCTTTTTACTTTGAGAAAATTAGAGTGTTTCAAGCAGACTTTTGTCTTGAATACTTCAGCATGGAATAATAGAGTAGGACTTTGGTTCTATTTTGTTGGTTTTTGAACCTTAGTAATGGTTAATAGGAACGGTTGGGGGCATTCGTATT
TTPP1846	Netherlands	Ixodes ricinus	2013	Babesia venatorum	no ambiguous nucleotides	TTGTCTTGTATTGGATGATGGTGACCTAAACCCTCACCAGAGTAACAATTGGAGGGCAAGTCTGGTGCCAGCAGCCGCGGTAATTCCAGCTCCAATAGCGTATATTAAACTTGTTGCAGTTAAAAAGCTCGTAGTTGAATTTCTGCGTTATCGAGTTATTGACTCTTGTCTTTAATCGATTTCGCTTTTGGGATTTATCCCTTTTTACTTTGAGAAAATTAGAGTGTTTCAAGCAGACTTTTGTCTTGAATACTTCAGCATGGAATAATAGAGTAGGACTTTGGTTCTATTTTGTTGGTTTTTGAACCTTAGTAATGGTTAATAGGAACGGTTGGGGGCATTCGTATT
TTPP267	Netherlands	Ixodes ricinus	2013	Babesia venatorum	no ambiguous nucleotides	TTGTCTTGTATTGGATGATGGTGACCTAAACCCTCACCAGAGTAACAATTGGAGGGCAAGTCTGGTGCCAGCAGCCGCGGTAATTCCAGCTCCAATAGCGTATATTAAACTTGTTGCAGTTAAAAAGCTCGTAGTTGAATTTCTGCGTTATCGAGTTATTGACTCTTGTCTTTAATCGATTTCGCTTTTGGGATTTATCCCTTTTTACTTTGAGAAAATTAGAGTGTTTCAAGCAGACTTTTGTCTTGAATACTTCAGCATGGAATAATAGAGTAGGACTTTGGTTCTATTTTGTTGGTTTTTGAACCTTAGTAATGGTTAATAGGAACGGTTGGGGGCATTCGTATT
TTPP461	Netherlands	Ixodes ricinus	2013	Babesia venatorum	no ambiguous nucleotides	TTGTCTTGTATTGGATGATGGTGACCTAAACCCTCACCAGAGTAACAATTGGAGGGCAAGTCTGGTGCCAGCAGCCGCGGTAATTCCAGCTCCAATAGCGTATATTAAACTTGTTGCAGTTAAAAAGCTCGTAGTTGAATTTCTGCGTTATCGAGTTATTGACTCTTGTCTTTAATCGATTTCGCTTTTGGGATTTATCCCTTTTTACTTTGAGAAAATTAGAGTGTTTCAAGCAGACTTTTGTCTTGAATACTTCAGCATGGAATAATAGAGTAGGACTTTGGTTCTATTTTGTTGGTTTTTGAACCTTAGTAATGGTTAATAGGAACGGTTGGGGGCATTCGTATT
TTPP814	Netherlands	Ixodes ricinus	2013	Babesia venatorum	no ambiguous nucleotides	TTGTCTTGTATTGGATGATGGTGACCTAAACCCTCACCAGAGTAACAATTGGAGGGCAAGTCTGGTGCCAGCAGCCGCGGTAATTCCAGCTCCAATAGCGTATATTAAACTTGTTGCAGTTAAAAAGCTCGTAGTTGAATTTCTGCGTTATCGAGTTATTGACTCTTGTCTTTAATCGATTTCGCTTTTGGGATTTATCCCTTTTTACTTTGAGAAAATTAGAGTGTTTCAAGCAGACTTTTGTCTTGAATACTTCAGCATGGAATAATAGAGTAGGACTTTGGTTCTATTTTGTTGGTTTTTGAACCTTAGTAATGGTTAATAGGAACGGTTGGGGGCATTCGTATT
TTPP1756	Netherlands	Ixodes ricinus	2013	Babesia venatorum	ambiguous nucleotides	TTGTCTTGTATTGGATGATGGTGACCTAAACCCTCACCAGAGTAACAATTGGAGGGCAAGTCTGGTGCCAGCAGCCGCGGTAATTCCAGCTCCAATAGCGTATATTAAACTTGTTGCAGTTAAAAAGCTCGTAGTTGAATTTCTGCGTTATCGAGTTATTGACTCTTGTCTTTAATCGATTTCGCTTYTGGGATTTATCCCTTTTTACTTTGAGAAAATTAGAGTGTTTCAAGCAGACTTTTGTCTTGAATACTTCAGCATGGAATAATAGAGTAGGACTTTGGTTCTATTTTGTTGGTTTTTGAACCTTAGTAATGGTTAATAGGAACGGTTGGGGGCATTCGTATT
BegrazingTeek413	Netherlands	Ixodes ricinus		Babesia venatorum		AAATAACAATACAGGGCAATTGTCTTGTAATTGGAATGATGGTGACCTAAACCCTCACCAGAGTAACAATTGGAGGGCAAGTCYGGTGCCAGCAGCCGCGGTAAYYCCAGCTCCAATAGCGTATATTAAACTTGTTGCAGTTAAAAAGCTCGTAGTTGAATTTCTGCGTTATCGAGTTATTGACTCTTGTCTTTAATCGATTTCGCTTTTGGGATTTATCCCTTTTTACTTTGARAAAATTAGAGTGTTTCAAGCAGACTTTTGTCTTGAATACTTCAGCATGGAATAATAGAGTAGGACTTTGGTTCTATTTTGTTGGTTTTTGAACCTTAGTAATGGTTAATAGGAACGGTTGGGGGCATTCGTATT
BegrazingTeek1987	Netherlands	Ixodes ricinus		Babesia venatorum		AAATAACAATACAGGGCAATKGTYTWGTAAKWGGAATGATGGTGACCTAAACCCTCACCAGAGTAACAATTGGAGGGCAAGTCTGGTGCCAGCAGCCGCGGTAATTCCAGCTCCAATAGCGTATATTAAACTTGTTGCAGTTAAAAAGCTCGTAGTTGAATTTCTGCGTTATCGAGTTATTGACTCTTGTCTTTAATCGATTTCGCTTTTGGGATTTATCCCTTTTTACTTTGAGAAAATTAGAGTGTTTCAAGCAGACTTTTGTCTTGAATACTTCAGCATGGAATAATAGAGTAGGACTTTGGTTCTATTTTGTTGGTTTTTGAACCTTARTAATGGTTAATAGGAACGGTTGGGGGC
MagnaDeer67F	Netherlands	Capreolus capreolus		Babesia venatorum	ambiguous nucleotides	AAATAACAMTMCAGGGCAATTGTCYTGTAATTGGMATGATGGTGACCTAAACCCTCACCAGAGTAACAATTGGAGGGCAAGTCTGGTGCCAGCAGCCGCGGTAATTCCAGCTCCAATAGCGTATATTAAACTTGTTGCAGTTAAAAAGCTCGTAGTTGAATTTCTGCGTKATCGAGTTATTGACTCTTGTCTTTAATCSAYTTCGCTTTTGGGATTTATCCCTTTTTACTTTGAGAAAATTAGAGTGTTTCAAGCAGACTTTTGTCTTGAATACTTCAGCATGGAATAATAGAGTAGGACTTTGGTTCTATTTTGTTGGTTTTTGAACCTTAGTAATGGTTAATAGGAACGGTTGGGGGCATTCGTATT
MagnaDeer3H	Netherlands	Capreolus capreolus		Babesia cap/ven coinf?	ambiguous nucleotides	AAATAWCAATACAGGGCAATTGTCTTGTAATTGGAATGATGGTGACCTAAACCCTCACCAGAGTAACAATTGGAGGGCAAGTCTGGTGCCAGCAGCCGCGGTAATTCCAGCTCCAATAGCGTATATTAAACTTGTTGCAGTTAAAAAGCTCGTAGTTGAATTTYTGCGTKATSKAWWTATTGACTSWTGTCTWTAATSSATTTCGCTTTTGGGATTTWTCCCTTTTTACTTTGAGAAAATTAGAGTGTTTCAAGCAGACTTTTGTCTTGAATACTTCAGCATGGAATAATAGAGTAGGACTTTGGTTCTATTTTGTTGGTTTKTGAACCTTAGTAATGGTTAATAGGAACGGTTGGGGGCATTCGTATT
MagnaDeer37C	Netherlands	Capreolus capreolus		Babesia cap/ven coinf?	ambiguous nucleotides	AAATAWCAATACAGGGCAATTGTCTTGTAATTGGAATGATGGTGACCTAAACCCTCACCAGAGTAACAATTGGAGGGCAAGTCTGGTGCCAGCAGCCGCGGTAATTCCAGCTCCAATAGCGTATATTAAACTTGTTGCAGTTAAAAAGCTCGTAGTTGAATTTYTGCGTKRTSGWRWTATTGACTSWTGTCTWKAWTSSATTTCGCTTTTGGGATTTWTCCCTTTTTACTTTGAGAAAATTAGAGTGTTTCAAGCAGACTTTTGTCTTGAATACTTCAGCATGGAATAATAGAGTAGGACTTTGGTTCTATTTTGTTGGTTTKTGAACCTTAGTAATGGTTAATAGGAACGGTTGGGGGCATTCGTATT
Edelhert3111107036	Netherlands	Cervus elaphus		Babesia odocoilei-EU		AAATAACAATACAGGGCAATTGTCTTGTAATTGGAATGATGGTGACCTAAACCCTCACCAGAGTAACAATTGGAGGGCAAGTCTGGTGCCAGCAGCCGCGGTAATTCCAGCTCCAATAGCGTATATTAAACTTGTTGCAGTTAAAAAGCTCGTAGTTGAATTTTTGCGTCACCGTGTATCGACATTTGTCGTTTATCGGTTTCGCTTTTGGGATTTATCCCTTTTTACTTTGAGAAAATTAGAGTGTTTCAAGCAGACTTTTGTCTTGAATACTTCAGCATGGAATAATAGAGTAGGACTTTGGTTCTATTTTGTTGGTTTGTGAACCTTAGTAATGGTTAATAGGAACGGTTGGGGGCATTCGTATT
Edelhert3151126001	Netherlands	Cervus elaphus		Babesia odocoilei-EU		AAATAACAATACAGGGCAATTGTCTTGTAATTGGAATGATGGTGACCTAAACCCTCACCAGAGTAACAATTGGAGGGCAAGTCTGGTGCCAGCAGCCGCGGTAATTCCAGCTCCAATAGCGTATATTAAACTTGTTGCAGTTAAAAAGCTCGTAGTTGAATTTTTGCGTCACCGTGTATCGACATTTGTCGTTTATCGGTTTCGCTTTTGGGATTTATCCCTTTTTACTTTGAGAAAATTAGAGTGTTTCAAGCAGACTTTTGTCTTGAATACTTCAGCATGGAATAATAGAGTAGGACTTTGGTTCTATTTTGTTGGTTTGTGAACCTTAGTAATGGTTAATAGGAACGGTTGGGGGCATTCGTATT
Edelhert3160202013	Netherlands	Cervus elaphus		Babesia odocoilei-EU		AAATAACAATACAGGGCAATTGTCTTGTAATTGGAATGATGGTGACCTAAACCCTCACCAGAGTAACAATTGGAGGGCAAGTCTGGTGCCAGCAGCCGCGGTAATTCCAGCTCCAATAGCGTATATTAAACTTGTTGCAGTTAAAAAGCTCGTAGTTGAATTTTTGCGTCACCGTGTATCGACATTTGTCGTTTATCGGTTTCGCTTTTGGGATTTATCCCTTTTTACTTTGAGAAAATTAGAGTGTTTCAAGCAGACTTTTGTCTTGAATACTTCAGCATGGAATAATAGAGTAGGACTTTGGTTCTATTTTGTTGGTTTGTGAACCTTAGTAATGGTTAATAGGAACGGTTGGGGGCATTCGTATT
PWN27fd	Netherlands	Dama dama	2018	Babesia odocoilei-EU		AAATAACAATACAGGGCAATTGTCTTGTAATTGGAATGATGGTGACCTAAACCCTCACCAGAGTAACAATTGGAGGGCAAGTCTGGTGCCAGCAGCCGCGGTAATTCCAGCTCCAATAGCGTATATTAAACTTGTTGCAGTTAAAAAGCTCGTAGTTGAATTTTTGCGTCACCGTGTATCGACATTTGTCGTTTATCGGTTTCGCTTTTGGGATTTATCCCTTTTTACTTTGAGAAAATTAGAGTGTTTCAAGCAGACTTTTGTCTTGAATACTTCAGCATGGAATAATAGAGTAGGACTTTGGTTCTATTTTGTTGGTTTGTGAACCTTAGTAATGGTTAATAGGAACGGTTGGGGGCATTCGTATTTAACTG
EH79KD	Netherlands	Cervus elaphus		Babesia odocoilei-EU		GGGCAATTGTCTTGTAATTGGAATGATGGTGACCTAAACCCTCACCAGAGTAACAATTGGAGGGCAAGTCTGGTGCCAGCAGCCGCGGTAATTCCAGCTCCAATAGCGTATATTAAACTTGTTGCAGTTAAAAAGCTCGTAGTTGAATTTTTGCGTCACCGTGTATCGACATTTGTCGTTTATCGGTTTCGCTTTTGGGATTTATCCCTTTTTACTTTGAGAAAATTAGAGTGTTTCAAGCAGACTTTTGTCTTGAATACTTCAGCATGGAATAATAGAGTAGGACTTTGGTTCTATTTTGTTGGTTTGTGAACCTTAGTAATGGTTAATAGGAACGGTTGGGGGCATTCGTATTT
EH78KD	Netherlands	Cervus elaphus		Babesia odocoilei-EU		AATAACAATACAGGGCAATTGTCTTGTAATTGGAATGATGGTGACCTAAACCCTCACCAGAGTAACAATTGGAGGGCAAGTCTGGTGCCAGCAGCCGCGGTAATTCCAGCTCCAATAGCGTATATTAAACTTGTTGCAGTTAAAAAGCTCGTAGTTGAATTTTTGCGTCACCGTGTATCGACATTTGTCGTTTATCGGTTTCGCTTTTGGGATTTATCCCTTTTTACTTTGAGAAAATTAGAGTGTTTCAAGCAGACTTTTGTCTTGAATACTTCAGCATGGAATAATAGAGTAGGACTTTGGTTCTATTTTGTTGGTTTGTGAACCTTAGTAATGGTTAATAGGAACGGTTGGGGGCATTCGTATTT
EH24301	Netherlands	Cervus elaphus		Babesia odocoilei-EU		AATAACAATACAGGGCAATTGTCTTGTAATTGGAATGATGGTGACCTAAACCCTCACCAGAGTAACAATTGGAGGGCAAGTCTGGTGCCAGCAGCCGCGGTAATTCCAGCTCCAATAGCGTATATTAAACTTGTTGCAGTTAAAAAGCTCGTAGTTGAATTTTTGCGTCACCGTGTATCGACATTTGTCGTTTATCGGTTTCGCTTTTGGGATTTATCCCTTTTTACTTTGAGAAAATTAGAGTGTTTCAAGCAGACTTTTGTCTTGAATACTTCAGCATGGAATAATAGAGTAGGACTTTGGTTCTATTTTGTTGGTTTGTGAACCTTAGTAATGGTTAATAGGAACGGTTGGGGGCATTCGTATT
EH24089	Netherlands	Cervus elaphus		Babesia odocoilei-EU		AATAACAATACAGGGCAATTGTCTTGTAATTGGAATGATGGTGACCTAAACCCTCACCAGAGTAACAATTGGAGGGCAAGTCTGGTGCCAGCAGCCGCGGTAATTCCAGCTCCAATAGCGTATATTAAACTTGTTGCAGTTAAAAAGCTCGTAGTTGAATTTTTGCGTCACCGTGTATCGACATTTGTCGTTTATCGGTTTCGCTTTTGGGATTTATCCCTTTTTACTTTGAGAAAATTAGAGTGTTTCAAGCAGACTTTTGTCTTGAATACTTCAGCATGGAATAATAGAGTAGGACTTTGGTTCTATTTTGTTGGTTTGTGAACCTTAGTAATGGTTAATAGGAACGGTTGGGGGCATTCGTATT
EH23218	Netherlands	Cervus elaphus		Babesia odocoilei-EU		GTAATTGGAATGATGGTGACCTAAACCCTCACCAGAGTAACAATTGGAGGGCAAGTCTGGTGCCAGCAGCCGCGGTAATTCCAGCTCCAATAGCGTATATTAAACTTGTTGCAGTTAAAAAGCTCGTAGTTGAATTTTTGCGTCACCGTGTATCGACATTTGTCGTTTATCGGTTTCGCTTTTGGGATTTATCCCTTTTTACTTTGAGAAAATTAGAGTGTTTCAAGCAGACTTTTGTCTTGAATACTTCAGCATGGAATAATAGAGTAGGACTTTGGTTCTATTTTGTTGGTTTGTGAACCTTAGTAATG
EH24175	Netherlands	Cervus elaphus		Babesia odocoilei-EU		AATAACAATACAGGGCAATTGTCTTGTAATTGGAATGATGGTGACCTAAACCCTCACCAGAGTAACAATTGGAGGGCAAGTCTGGTGCCAGCAGCCGCGGTAATTCCAGCTCCAATAGCGTATATTAAACTTGTTGCAGTTAAAAAGCTCGTAGTTGAATTTTTGCGTCACCGTGTATCGACATTTGTCGTTTATCGGTTTCGCTTTTGGGATTTATCCCTTTTTACTTTGAGAAAATTAGAGTGTTTCAAGCAGACTTTTGTCTTGAATACTTCAGCATGGAATAATAGAGTAGGACTTTGGTTCTATTTTGTTGGTTTGTGAACCTTAGTAATGGTTAATAGGAACGGTTGGGGGCATTCGTATT
EH24688	Netherlands	Cervus elaphus		Babesia odocoilei-EU		AAATAACAATACAGGGCAATTGTCTTGTAATTGGAATGATGGTGACCTAAACCCTCACCAGAGTAACAATTGGAGGGCAAGTCTGGTGCCAGCAGCCGCGGTAATTCCAGCTCCAATAGCGTATATTAAACTTGTTGCAGTTAAAAAGCTCGTAGTTGAATTTTTGCGTCACCGTGTATCGACATTTGTCGTTTATCGGTTTCGCTTTTGGGATTTATCCCTTTTTACTTTGAGAAAATTAGAGTGTTTCAAGCAGACTTTTGTCTTGAATACTTCAGCATGGAATAATAGAGTAGGACTTTGGTTCTATTTTGTTGGTTTGTGAACCTTAGTAATGGTTAATAGGAACGGTTGGGGGCATTCGTATT
EH24718	Netherlands	Cervus elaphus		Babesia odocoilei-EU		AAATAACAATACAGGGCAATTGTCTTGTAATTGGAATGATGGTGACCTAAACCCTCACCAGAGTAACAATTGGAGGGCAAGTCTGGTGCCAGCAGCCGCGGTAATTCCAGCTCCAATAGCGTATATTAAACTTGTTGCAGTTAAAAAGCTCGTAGTTGAATTTTTGCGTCACCGTGTATCGACATTTGTCGTTTATCGGTTTCGCTTTTGGGATTTATCCCTTTTTACTTTGAGAAAATTAGAGTGTTTCAAGCAGACTTTTGTCTTGAATACTTCAGCATGGAATAATAGAGTAGGACTTTGGTTCTATTTTGTTGGTTTGTGAACCTTAGTAATGGTTAATAGGAACGGTTGGGGGCATTCGTATT
EH24745	Netherlands	Cervus elaphus		Babesia odocoilei-EU		AAATAACAATACAGGGCAATTGTCTTGTAATTGGAATGATGGTGACCTAAACCCTCACCAGAGTAACAATTGGAGGGCAAGTCTGGTGCCAGCAGCCGCGGTAATTCCAGCTCCAATAGCGTATATTAAACTTGTTGCAGTTAAAAAGCTCGTAGTTGAATTTTTGCGTCACCGTGTATCGACATTTGTCGTTTATCGGTTTCGCTTTTGGGATTTATCCCTTTTTACTTTGAGAAAATTAGAGTGTTTCAAGCAGACTTTTGTCTTGAATACTTCAGCATGGAATAATAGAGTAGGACTTTGGTTCTATTTTGTTGGTTTGTGAACCTTAGTAATGGTTAATAGGAACGGTTGGGGGCATTCGTATT
EH24802	Netherlands	Cervus elaphus		Babesia odocoilei-EU		AATAACAATACAGGGCAATTGTCTTGTAATTGGAATGATGGTGACCTAAACCCTCACCAGAGTAACAATTGGAGGGCAAGTCTGGTGCCAGCAGCCGCGGTAATTCCAGCTCCAATAGCGTATATTAAACTTGTTGCAGTTAAAAAGCTCGTAGTTGAATTTTTGCGTCACCGTGTATCGACATTTGTCGTTTATCGGTTTCGCTTTTGGGATTTATCCCTTTTTACTTTGAGAAAATTAGAGTGTTTCAAGCAGACTTTTGTCTTGAATACTTCAGCATGGAATAATAGAGTAGGACTTTGGTTCTATTTTGTTGGTTTGTGAACCTTAGTAATGGTTAATAGGAACGGTTGGGGGCATTCGTATTT
EH24790	Netherlands	Cervus elaphus		Babesia odocoilei-EU		AATTGGAATGATGGTGACCTAAACCCTCACCAGAGTAACAATTGGAGGGCAAGTCTGGTGCCAGCAGCCGCGGTAATTCCAGCTCCAATAGCGTATATTAAACTTGTTGCAGTTAAAAAGCTCGTAGTTGAATTTTTGCGTCACCGTGTATCGACATTTGTCGTTTATCGGTTTCGCTTTTGGGATTTATCCCTTTTTACTTTGAGAAAATTAGAGTGTTTCAAGCAGACTTTTGTCTTGAATACTTCAGCATGGAATAATAGAGTAGGACTTTGGTTCTATTTTGTTGGTTTGTGAACCTTAGTAATGGTTAATAGGAACGGTTGGGGGCATTCGTATT
EH24725	Netherlands	Cervus elaphus		Babesia odocoilei-EU		AATAACAATACAGGGCAATTGTCTTGTAATTGGAATGATGGTGACCTAAACCCTCACCAGAGTAACAATTGGAGGGCAAGTCTGGTGCCAGCAGCCGCGGTAATTCCAGCTCCAATAGCGTATATTAAACTTGTTGCAGTTAAAAAGCTCGTAGTTGAATTTTTGCGTCACCGTGTATCGACATTTGTCGTTTATCGGTTTCGCTTTTGGGATTTATCCCTTTTTACTTTGAGAAAATTAGAGTGTTTCAAGCAGACTTTTGTCTTGAATACTTCAGCATGGAATAATAGAGTAGGACTTTGGTTCTATTTTGTTGGTTTGTGAACCTTAGTAATGGTTAATAGGAACGGTTGGGGGCATTCGTATT
EH23884	Netherlands	Cervus elaphus		Babesia odocoilei-EU		TGTCTTGTAATTGGAATGATGGTGACCTAAACCCTCACCAGAGTAACAATTGGAGGGCAAGTCTGGTGCCAGCAGCCGCGGTAATTCCAGCTCCAATAGCGTATATTAAACTTGTTGCAGTTAAAAAGCTCGTAGTTGAATTTTTGCGTCACCGTGTATCGACATTTGTCGTTTATCGGTTTCGCTTTTGGGATTTATCCCTTTTTACTTTGAGAAAATTAGAGTGTTTCAAGCAGACTTTTGTCTTGAATACTTCAGCATGGAATAATAGAGTAGGACTTTGGTTCTATTTTGTTGGTTTGTGAACCTTAGTAATGGTTAATAGGAACGGTTGGGGGCATTCGTATT
EH23836	Netherlands	Cervus elaphus		Babesia odocoilei-EU		AATAACAATACAGGGCAATTGTCTTGTAATTGGAATGATGGTGACCTAAACCCTCACCAGAGTAACAATTGGAGGGCAAGTCTGGTGCCAGCAGCCGCGGTAATTCCAGCTCCAATAGCGTATATTAAACTTGTTGCAGTTAAAAAGCTCGTAGTTGAATTTTTGCGTCACCGTGTATCGACATTTGTCGTTTATCGGTTTCGCTTTTGGGATTTATCCCTTTTTACTTTGAGAAAATTAGAGTGTTTCAAGCAGACTTTTGTCTTGAATACTTCAGCATGGAATAATAGAGTAGGACTTTGGTTCTATTTTGTTGGTTTGTGAACCTTAGTAATGGTTAATAGGAACGGTTGGGGGCATTCGTATT
EH69452	Netherlands	Cervus elaphus		Babesia odocoilei-EU		AAATAACAATACAGGGCAATTGTCTTGTAATTGGAATGATGGTGACCTAAACCCTCACCAGAGTAACAATTGGAGGGCAAGTCTGGTGCCAGCAGCCGCGGTAATTCCAGCTCCAATAGCGTATATTAAACTTGTTGCAGTTAAAAAGCTCGTAGTTGAATTTTTGCGTCACCGTGTATCGACATTTGTCGTTTATCGGTTTCGCTTTTGGGATTTATCCCTTTTTACTTTGAGAAAATTAGAGTGTTTCAAGCAGACTTTTGTCTTGAATACTTCAGCATGGAATAATAGAGTAGGACTTTGGTTCTATTTTGTTGGTTTGTGAACCTTAGTAATGGTTAATAGGAACGGTTGGGGGCATTCGTATT
EH8RK	Netherlands	Cervus elaphus		Babesia odocoilei-EU		TTGTAATTGGAATGATGGTGACCTAAACCCTCACCAGAGTAACAATTGGAGGGCAAGTCTGGTGCCAGCAGCCGCGGTAATTCCAGCTCCAATAGCGTATATTAAACTTGTTGCAGTTAAAAAGCTCGTAGTTGAATTTTTGCGTCACCGTGTATCGACATTTGTCGTTTATCGGTTTCGCTTTTGGGATTTATCCCTTTTTACTTTGAGAAAATTAGAGTGTTTCAAGCAGACTTTTGTCTTGAATACTTCAGCATGGAATAATAGAGTAGGACTTTGGTTCTATTTTGTTGGTTTGTGAACCTTAGTAAT
EH5RK	Netherlands	Cervus elaphus		Babesia odocoilei-EU		TGTCTTGTAATTGGAATGATGGTGACCTAAACCCTCACCAGAGTAACAATTGGAGGGCAAGTCTGGTGCCAGCAGCCGCGGTAATTCCAGCTCCAATAGCGTATATTAAACTTGTTGCAGTTAAAAAGCTCGTAGTTGAATTTTTGCGTCACCGTGTATCGACATTTGTCGTTTATCGGTTTCGCTTTTGGGATTTATCCCTTTTTACTTTGAGAAAATTAGAGTGTTTCAAGCAGACTTTTGTCTTGAATACTTCAGCATGGAATAATAGAGTAGGACTTTGGTTCTATTTTGTTGGTTTGTGAACCTTAGTAAT
EH2RK	Netherlands	Cervus elaphus		Babesia odocoilei-EU		AAATAACAATACAGGGCAATTGTCTTGTAATTGGAATGATGGTGACCTAAACCCTCACCAGAGTAACAATTGGAGGGCAAGTCTGGTGCCAGCAGCCGCGGTAATTCCAGCTCCAATAGCGTATATTAAACTTGTTGCAGTTAAAAAGCTCGTAGTTGAATTTTTGCGTCACCGTGTATCGACATTTGTCGTTTATCGGTTTCGCTTTTGGGATTTATCCCTTTTTACTTTGAGAAAATTAGAGTGTTTCAAGCAGACTTTTGTCTTGAATACTTCAGCATGGAATAATAGAGTAGGACTTTGGTTCTATTTTGTTGGTTTGTGAACCTTAGTAATGGTTAATAGGAACGGTTGGGGGCATTCGTATT
EH77KD	Netherlands	Cervus elaphus		Babesia odocoilei-EU		GAAATAACAATACAGGGCAATTGTCTTGTAATTGGAATGATGGTGACCTAAACCCTCACCAGAGTAACAATTGGAGGGCAAGTCTGGTGCCAGCAGCCGCGGTAATTCCAGCTCCAATAGCGTATATTAAACTTGTTGCAGTTAAAAAGCTCGTAGTTGAATTTTTGCGTCACCGTGTATCGACATTTGTCGTTTATCGGTTTCGCTTTTGGGATTTATCCCTTTTTACTTTGAGAAAATTAGAGTGTTTCAAGCAGACTTTTGTCTTGAATACTTCAGCATGGAATAATAGAGTAGGACTTTGGTTCTATTTTGTTGGTTTGTGAACCTTAGTAATGGTTAATAGGAACGGTTGGGGGCATTCGTATT
EH24221	Netherlands	Cervus elaphus		Babesia odocoilei-EU		AAATAACAATACAGGGCAATTGTCTTGTAATTGGAATGATGGTGACCTAAACCCTCACCAGAGTAACAATTGGAGGGCAAGTCTGGTGCCAGCAGCCGCGGTAATTCCAGCTCCAATAGCGTATATTAAACTTGTTGCAGTTAAAAAGCTCGTAGTTGAATTTTTGCGTCACCGTGTATCGACATTTGTCGTTTATCGGTTTCGCTTTTGGGATTTATCCCTTTTTACTTTGAGAAAATTAGAGTGTTTCAAGCAGACTTTTGTCTTGAATACTTCAGCATGGAATAATAGAGTAGGACTTTGGTTCTATTTTGTTGGTTTGTGAACCTTAGTAATGGTTAATAGGAACGGTTGGGGGCATTCGTATT
EH24307	Netherlands	Cervus elaphus		Babesia odocoilei-EU		AAATAACAATACAGGGCAATTGTCTTGTAATTGGAATGATGGTGACCTAAACCCTCACCAGAGTAACAATTGGAGGGCAAGTCTGGTGCCAGCAGCCGCGGTAATTCCAGCTCCAATAGCGTATATTAAACTTGTTGCAGTTAAAAAGCTCGTAGTTGAATTTTTGCGTCACCGTGTATCGACATTTGTCGTTTATCGGTTTCGCTTTTGGGATTTATCCCTTTTTACTTTGAGAAAATTAGAGTGTTTCAAGCAGACTTTTGTCTTGAATACTTCAGCATGGAATAATAGAGTAGGACTTTGGTTCTATTTTGTTGGTTTGTGAACCTTAGTAATGGTTAATAGGAACGGTTGGGGGCATTCGTATT
EH24769	Netherlands	Cervus elaphus		Babesia odocoilei-EU		AAATAACAATACAGGGCAATTGTCTTGTAATTGGAATGATGGTGACCTAAACCCTCACCAGAGTAACAATTGGAGGGCAAGTCTGGTGCCAGCAGCCGCGGTAATTCCAGCTCCAATAGCGTATATTAAACTTGTTGCAGTTAAAAAGCTCGTAGTTGAATTTTTGCGTCACCGTGTATCGACATTTGTCGTTTATCGGTTTCGCTTTTGGGATTTATCCCTTTTTACTTTGAGAAAATTAGAGTGTTTCAAGCAGACTTTTGTCTTGAATACTTCAGCATGGAATAATAGAGTAGGACTTTGGTTCTATTTTGTTGGTTTGTGAACCTTAGTAATGGTTAATAGGAACGGTTGGGGGCATTCGTATT
Edelhert3161103002	Netherlands	Cervus elaphus		Babesia odocoilei-EU		ACAATMCAGGGCAATTGTCTTGTAATTGGAATGATGGTGACCTAAACCCTCACCAGAGTAACAATTGGAGGGCAAGTCTGGTGCCAGCAGCCGCGGTAATTCCAGCTCCAATAGCGTATATTAAACTTGTTGCAGTTAAAAAGCTCGTAGTTGAATTTTTGCGTCACCGTGTATCGACATTTGTCGTTTATCGGTTTCGCTTTTGGGATTTATCCCTTTTTACTTTGAGAAAATTAGAGTGTTTCAAGCAGACTTTTGTCTTGAATACTTCAGCATGGAATAATAGAGTAGGACTTTGGTTCTATTTTGTTGGTTTGTGAACCTTAGTAATGGTTAATAGGAAC
E10	Netherlands	Cervus elaphus	2019	Babesia odocoilei-EU		GGGCAATTGTCWTGTAAWTGGAATGATGGTGACCTAAACCCTCACCAGAGTAACAATTGGAGGGCAAGTCTGGTGCCAGCAGCCGCGGTAATTCCAGCTCCAATAGCGTATATTAAACTTGTTGCAGTTAAAAAGCTCGTAGTTGAATTTTTGCGTCACCGTGTATCGACATTTGTCGTTTATCGGTTTCGCTTTTGGGATTTATCCCTTTTTACTTTGAGAAAATTAGAGTGTTTCAAGCAGACTTTTGTCTTGAATACTTCAGCATGGAATAATAGAGTAGGACTTTGGTTCTATTTTGTTGGTTTGTGAACCTTAGTAATGGTTAATAGGAACGGTTGGGGGCATTCGTATT
EH23874	Netherlands	Cervus elaphus		Babesia odocoilei-EU		AAATAACAATACAGGGCAATTGTCTTGTAATTGGAATGATGGTGACCTAAACCCTCACCAGAGTAACAATTGGAGGGCAAGTCTGGTGCCAGCAGCCGCGGTAATTCCAGCTCCAATAGCGTATATTAAACTTGTTGCAGTTAAAAAGCTCGTAGTTGAATTTTTGCGTCACCGTGTATCGACATTKGTCGTTTATCGGTTTCGCTTTTGGGATTTATCCCTTTTTACTTTGAGAAAATTAGAGTGTTTCAAGCAGACTTTTGTCTTGAATACTTCAGCATGGAATAATAGAGTAGGACTTTGGTTCTATTTTGTTGRTTTGTGAACCTTAGTAATGGTTAATAGGAACGGTTGGGGGCATTCGTATT
RJ1610	Netherlands	Ixodes ricinus	2013	Babesia odocoilei-EU	no ambiguous nucleotides	AAATAACAATACAGGGCAATTGTCTTGTAATTGGAATGATGGTGACCTAAACCCTCACCAGAGTAACAATTGGAGGGCAAGTCTGGTGCCAGCAGCCGCGGTAATTCCAGCTCCAATAGCGTATATTAAACTTGTTGCAGTTAAAAAGCTCGTAGTTGAATTTTTGCGTCACCGTGTATCGACATTGGTCGTTTATCGGTTTCGCTTTTGGGATTTATCCCTTTTTACTTTGAGAAAATTAGAGTGTTTCAAGCAGACTTTTGTCTTGAATACTTCAGCATGGAATAATAGAGTAGGACTTTGGTTCTATTTTGTTGGTTTGTGAACCTTAGT
EH24715	Netherlands	Cervus elaphus		Babesia odocoilei-EU		AAATAACAATACAGGGCAATTGTCTTGTAATTGGAATGATGGTGACCTAAACCCTCACCAGAGTAACAATTGGAGGGCAAGTCTGGTGCCAGCAGCCGCGGTAATTCCAGCTCCAATAGCGTATATTAAACTTGTTGCAGTTAAAAAGCTCGTAGTTGAATTTTTGCGTCACCGTGTATCGACATTGGTCGTTTATCGGTTTCGCTTTTGGGATTTATCCCTTTTTACTTTGAGAAAATTAGAGTGTTTCAAGCAGACTTTTGTCTTGAATACTTCAGCATGGAATAATAGAGTAGGACTTTGGTTCTATTTTGTTGGTTTGTGAACCTTAGTAATGGTTAATAGGAACGGTTGGGGGCATTCGTATT
EH24668	Netherlands	Cervus elaphus		Babesia odocoilei-EU		AATAACAATACAGGGCAATTGTCTTGTAATTGGAATGATGGTGACCTAAACCCTCACCAGAGTAACAATTGGAGGGCAAGTCTGGTGCCAGCAGCCGCGGTAATTCCAGCTCCAATAGCGTATATTAAACTTGTTGCAGTTAAAAAGCTCGTAGTTGAATTTTTGCGTCACCGTGTATCGACATTGGTCGTTTATCGGTTTCGCTTTTGGGATTTATCCCTTTTTACTTTGAGAAAATTAGAGTGTTTCAAGCAGACTTTTGTCTTGAATACTTCAGCATGGAATAATAGAGTAGGACTTTGGTTCTATTTTGTTGGTTTGTGAACCTTAGTAATGGTTAATAGGAACGGTTGGGGGCATTCGTATT
EH24308	Netherlands	Cervus elaphus		Babesia odocoilei-EU		GATGGTGACCTAAACCCTCACCAGAGTAACAATTGGAGGGCAAGTCTGGTGCCAGCAGCCGCGGTAATTCCAGCTCCAATAGCGTATATTAAACTTGTTGCAGTTAAAAAGCTCGTAGTTGAATTTTTGCGTCACCGTGTATCCACATTTGTCGTTTATCGGTTTCGCTTTTGGGATTTATCCCTTTTTACTTTGAGAAAATTAGAGTGTTTCAAGCAGACTTTTGTCTTGAATACTTCAGCATGGAATAATAGAGTAGGACTTTGGTTCTATTTTGTTGGTTTGTGAACCTTAGTAATGGTTAATAGGAACGGTTGGGGGCATTCGTATT
E14	Netherlands	Cervus elaphus	2019	Babesia odocoilei-EU		AAATAACWATACAGGGCAATTGTCTTGTAATTGGAATGATGGTGACCTAAACCCTCACCAGAGTAACAATTGGAGGGCAAGTCTGGTGCCAGCAGCCGCGGTAATTCCAGCTCCAATAGCGTATATTAAACTTGTTGCAGTTAAAAAGCTCGTAGTTGAATTTTTGCGTCACCGTGTATCGACATTTGTCGTTTATCGGTTTCGCTTTTGGGATTTCTCCCTTTTTACTTTGAGAAAATTAGAGTGTTTCAAGCAGACTTTTGTCTTGAATACTTCAGCATGGAATAATAGAGTAGGACTTTGGTTCTATTTTGTTGGTTTGTGAACCTTAGTAATGGTTAATAGGAACGGTTGGGGGCAWTCGTATT
D100BE	Belgium	Meles meles	2015	Babesia sp. badger type C (close Blast japan/racoon)		AAATAACAATACAGGGCTATTGTCTTGTAATTGGAATGATGGTGACCTAAACCCTCACCAGAGTAGCAATTGGAGGGCAAGTCTGGTGCCAGCAGCCGCGGTAATTCCAGCTCCAATAGCGTATATTAAACTTGTTGCAGTTAAAAAGCTCGTAGTTGTATTTCTGCGTCTCCGTTTTTGACTCTTGTCTTTTTCGGTTTCGCTTTTGGGTTTCTTCCCTTTTTACTTTGAGAAAATTAGAGTGTTTCAAGCAGACTTTTGTCTTGAATACTTCAGCATGGAATAATAAAGTAGGACTTTGGTTCTATTTTGTTGGTTTACGAACCTTAGTAATGGTTAATAGGAACGGTTGGGGGCATTCGTATT
B1 S1 7	Netherlands	Capreolus capreolus	2014	Babesia capreoli	no ambiguous nucleotides	AAATAACAATACAGGGCAATTGTCTTGTAATTGGAATGATGGTGACCTAAACCCTCACCAGAGTAACAATTGGAGGGCAAGTCTGGTGCCAGCAGCCGCGGTAATTCCAGCTCCAATAGCGTATATTAAACTTGTTGCAGTTAAAAAGCTCGTAGTTGAATTTTTGCGTGGTGTTAATATTGACTGATGTCGAGATTGCACTTCGCTTTTGGGATTTTTCCCTTTTTACTTTGAGAAAATTAGAGTGTTTCAAGCAGACTTTTGTCTTGAATACTTCAGCATGGAATAATAGAGTAGGACTTTGGTTCTATTTTGTTGGTTTGTGAACCTTAGTAATGGTTAATAGGAACGGTTGGGGGCATTCGTATT
B1 S20 1	Netherlands	Capreolus capreolus	2014	Babesia capreoli	no ambiguous nucleotides	AAATAACAATACAGGGCAATTGTCTTGTAATTGGAATGATGGTGACCTAAACCCTCACCAGAGTAACAATTGGAGGGCAAGTCTGGTGCCAGCAGCCGCGGTAATTCCAGCTCCAATAGCGTATATTAAACTTGTTGCAGTTAAAAAGCTCGTAGTTGAATTTTTGCGTGGTGTTAATATTGACTGATGTCGAGATTGCACTTCGCTTTTGGGATTTTTCCCTTTTTACTTTGAGAAAATTAGAGTGTTTCAAGCAGACTTTTGTCTTGAATACTTCAGCATGGAATAATAGAGTAGGACTTTGGTTCTATTTTGTTGGTTTGTGAACCTTAGTAATGGTTAATAGGAACGGTTGGGGGCATTCGTATT
B1 S3 22	Netherlands	Capreolus capreolus	2014	Babesia capreoli	no ambiguous nucleotides	AAATAACAATACAGGGCAATTGTCTTGTAATTGGAATGATGGTGACCTAAACCCTCACCAGAGTAACAATTGGAGGGCAAGTCTGGTGCCAGCAGCCGCGGTAATTCCAGCTCCAATAGCGTATATTAAACTTGTTGCAGTTAAAAAGCTCGTAGTTGAATTTTTGCGTGGTGTTAATATTGACTGATGTCGAGATTGCACTTCGCTTTTGGGATTTTTCCCTTTTTACTTTGAGAAAATTAGAGTGTTTCAAGCAGACTTTTGTCTTGAATACTTCAGCATGGAATAATAGAGTAGGACTTTGGTTCTATTTTGTTGGTTTGTGAACCTTAGTAATGGTTAATAGGAACGGTTGGGGGCATTCGTATT
B2 S17 72	Netherlands	Capreolus capreolus	2014	Babesia capreoli	no ambiguous nucleotides	AAATAACAATACAGGGCAATTGTCTTGTAATTGGAATGATGGTGACCTAAACCCTCACCAGAGTAACAATTGGAGGGCAAGTCTGGTGCCAGCAGCCGCGGTAATTCCAGCTCCAATAGCGTATATTAAACTTGTTGCAGTTAAAAAGCTCGTAGTTGAATTTTTGCGTGGTGTTAATATTGACTGATGTCGAGATTGCACTTCGCTTTTGGGATTTTTCCCTTTTTACTTTGAGAAAATTAGAGTGTTTCAAGCAGACTTTTGTCTTGAATACTTCAGCATGGAATAATAGAGTAGGACTTTGGTTCTATTTTGTTGGTTTGTGAACCTTAGTAATGGTTAATAGGAACGGTTGGGGGCATTCGTATT
B2 S20 13	Netherlands	Capreolus capreolus	2014	Babesia capreoli	no ambiguous nucleotides	AAATAACAATACAGGGCAATTGTCTTGTAATTGGAATGATGGTGACCTAAACCCTCACCAGAGTAACAATTGGAGGGCAAGTCTGGTGCCAGCAGCCGCGGTAATTCCAGCTCCAATAGCGTATATTAAACTTGTTGCAGTTAAAAAGCTCGTAGTTGAATTTTTGCGTGGTGTTAATATTGACTGATGTCGAGATTGCACTTCGCTTTTGGGATTTTTCCCTTTTTACTTTGAGAAAATTAGAGTGTTTCAAGCAGACTTTTGTCTTGAATACTTCAGCATGGAATAATAGAGTAGGACTTTGGTTCTATTTTGTTGGTTTGTGAACCTTAGTAATGGTTAATAGGAACGGTTGGGGGCATTCGTATT
B2 S21 16	Netherlands	Capreolus capreolus	2014	Babesia capreoli	no ambiguous nucleotides	AAATAACAATACAGGGCAATTGTCTTGTAATTGGAATGATGGTGACCTAAACCCTCACCAGAGTAACAATTGGAGGGCAAGTCTGGTGCCAGCAGCCGCGGTAATTCCAGCTCCAATAGCGTATATTAAACTTGTTGCAGTTAAAAAGCTCGTAGTTGAATTTTTGCGTGGTGTTAATATTGACTGATGTCGAGATTGCACTTCGCTTTTGGGATTTTTCCCTTTTTACTTTGAGAAAATTAGAGTGTTTCAAGCAGACTTTTGTCTTGAATACTTCAGCATGGAATAATAGAGTAGGACTTTGGTTCTATTTTGTTGGTTTGTGAACCTTAGTAATGGTTAATAGGAACGGTTGGGGGCATTCGTATT
B2 S4 51	Netherlands	Capreolus capreolus	2014	Babesia capreoli	no ambiguous nucleotides	AAATAACAATACAGGGCAATTGTCTTGTAATTGGAATGATGGTGACCTAAACCCTCACCAGAGTAACAATTGGAGGGCAAGTCTGGTGCCAGCAGCCGCGGTAATTCCAGCTCCAATAGCGTATATTAAACTTGTTGCAGTTAAAAAGCTCGTAGTTGAATTTTTGCGTGGTGTTAATATTGACTGATGTCGAGATTGCACTTCGCTTTTGGGATTTTTCCCTTTTTACTTTGAGAAAATTAGAGTGTTTCAAGCAGACTTTTGTCTTGAATACTTCAGCATGGAATAATAGAGTAGGACTTTGGTTCTATTTTGTTGGTTTGTGAACCTTAGTAATGGTTAATAGGAACGGTTGGGGGCATTCGTATT
B3 S5 58	Netherlands	Capreolus capreolus	2014	Babesia capreoli	no ambiguous nucleotides	AAATAACAATACAGGGCAATTGTCTTGTAATTGGAATGATGGTGACCTAAACCCTCACCAGAGTAACAATTGGAGGGCAAGTCTGGTGCCAGCAGCCGCGGTAATTCCAGCTCCAATAGCGTATATTAAACTTGTTGCAGTTAAAAAGCTCGTAGTTGAATTTTTGCGTGGTGTTAATATTGACTGATGTCGAGATTGCACTTCGCTTTTGGGATTTTTCCCTTTTTACTTTGAGAAAATTAGAGTGTTTCAAGCAGACTTTTGTCTTGAATACTTCAGCATGGAATAATAGAGTAGGACTTTGGTTCTATTTTGTTGGTTTGTGAACCTTAGTAATGGTTAATAGGAACGGTTGGGGGCATTCGTATT
MagnaDeer10B	Netherlands	Capreolus capreolus		Babesia capreoli	no ambiguous nucleotides	AAATAACAATACAGGGCAATTGTCTTGTAATTGGAATGATGGTGACCTAAACCCTCACCAGAGTAACAATTGGAGGGCAAGTCTGGTGCCAGCAGCCGCGGTAATTCCAGCTCCAATAGCGTATATTAAACTTGTTGCAGTTAAAAAGCTCGTAGTTGAATTTTTGCGTGGTGTTAATATTGACTGATGTCGAGATTGCACTTCGCTTTTGGGATTTTTCCCTTTTTACTTTGAGAAAATTAGAGTGTTTCAAGCAGACTTTTGTCTTGAATACTTCAGCATGGAATAATAGAGTAGGACTTTGGTTCTATTTTGTTGGTTTGTGAACCTTAGTAATGGTTAATAGGAACGGTTGGGGGCATTCGTATT
MagnaDeer10D	Netherlands	Capreolus capreolus		Babesia capreoli	no ambiguous nucleotides	AAATAACAATACAGGGCAATTGTCTTGTAATTGGAATGATGGTGACCTAAACCCTCACCAGAGTAACAATTGGAGGGCAAGTCTGGTGCCAGCAGCCGCGGTAATTCCAGCTCCAATAGCGTATATTAAACTTGTTGCAGTTAAAAAGCTCGTAGTTGAATTTTTGCGTGGTGTTAATATTGACTGATGTCGAGATTGCACTTCGCTTTTGGGATTTTTCCCTTTTTACTTTGAGAAAATTAGAGTGTTTCAAGCAGACTTTTGTCTTGAATACTTCAGCATGGAATAATAGAGTAGGACTTTGGTTCTATTTTGTTGGTTTGTGAACCTTAGTAATGGTTAATAGGAACGGTTGGGGGCATTCGTATT
MagnaDeer10G	Netherlands	Capreolus capreolus		Babesia capreoli	no ambiguous nucleotides	AAATAACAATACAGGGCAATTGTCTTGTAATTGGAATGATGGTGACCTAAACCCTCACCAGAGTAACAATTGGAGGGCAAGTCTGGTGCCAGCAGCCGCGGTAATTCCAGCTCCAATAGCGTATATTAAACTTGTTGCAGTTAAAAAGCTCGTAGTTGAATTTTTGCGTGGTGTTAATATTGACTGATGTCGAGATTGCACTTCGCTTTTGGGATTTTTCCCTTTTTACTTTGAGAAAATTAGAGTGTTTCAAGCAGACTTTTGTCTTGAATACTTCAGCATGGAATAATAGAGTAGGACTTTGGTTCTATTTTGTTGGTTTGTGAACCTTAGTAATGGTTAATAGGAACGGTTGGGGGCATTCGTATT
MagnaDeer11C	Netherlands	Capreolus capreolus		Babesia capreoli	no ambiguous nucleotides	AAATAACAATACAGGGCAATTGTCTTGTAATTGGAATGATGGTGACCTAAACCCTCACCAGAGTAACAATTGGAGGGCAAGTCTGGTGCCAGCAGCCGCGGTAATTCCAGCTCCAATAGCGTATATTAAACTTGTTGCAGTTAAAAAGCTCGTAGTTGAATTTTTGCGTGGTGTTAATATTGACTGATGTCGAGATTGCACTTCGCTTTTGGGATTTTTCCCTTTTTACTTTGAGAAAATTAGAGTGTTTCAAGCAGACTTTTGTCTTGAATACTTCAGCATGGAATAATAGAGTAGGACTTTGGTTCTATTTTGTTGGTTTGTGAACCTTAGTAATGGTTAATAGGAACGGTTGGGGGCATTCGTATT
MagnaDeer11D	Netherlands	Capreolus capreolus		Babesia capreoli	no ambiguous nucleotides	AAATAACAATACAGGGCAATTGTCTTGTAATTGGAATGATGGTGACCTAAACCCTCACCAGAGTAACAATTGGAGGGCAAGTCTGGTGCCAGCAGCCGCGGTAATTCCAGCTCCAATAGCGTATATTAAACTTGTTGCAGTTAAAAAGCTCGTAGTTGAATTTTTGCGTGGTGTTAATATTGACTGATGTCGAGATTGCACTTCGCTTTTGGGATTTTTCCCTTTTTACTTTGAGAAAATTAGAGTGTTTCAAGCAGACTTTTGTCTTGAATACTTCAGCATGGAATAATAGAGTAGGACTTTGGTTCTATTTTGTTGGTTTGTGAACCTTAGTAATGGTTAATAGGAACGGTTGGGGGCATTCGTATT
MagnaDeer11H	Netherlands	Capreolus capreolus		Babesia capreoli	no ambiguous nucleotides	AAATAACAATACAGGGCAATTGTCTTGTAATTGGAATGATGGTGACCTAAACCCTCACCAGAGTAACAATTGGAGGGCAAGTCTGGTGCCAGCAGCCGCGGTAATTCCAGCTCCAATAGCGTATATTAAACTTGTTGCAGTTAAAAAGCTCGTAGTTGAATTTTTGCGTGGTGTTAATATTGACTGATGTCGAGATTGCACTTCGCTTTTGGGATTTTTCCCTTTTTACTTTGAGAAAATTAGAGTGTTTCAAGCAGACTTTTGTCTTGAATACTTCAGCATGGAATAATAGAGTAGGACTTTGGTTCTATTTTGTTGGTTTGTGAACCTTAGTAATGGTTAATAGGAACGGTTGGGGGCATTCGTATT
MagnaDeer12A	Netherlands	Capreolus capreolus		Babesia capreoli	no ambiguous nucleotides	AAATAACAATACAGGGCAATTGTCTTGTAATTGGAATGATGGTGACCTAAACCCTCACCAGAGTAACAATTGGAGGGCAAGTCTGGTGCCAGCAGCCGCGGTAATTCCAGCTCCAATAGCGTATATTAAACTTGTTGCAGTTAAAAAGCTCGTAGTTGAATTTTTGCGTGGTGTTAATATTGACTGATGTCGAGATTGCACTTCGCTTTTGGGATTTTTCCCTTTTTACTTTGAGAAAATTAGAGTGTTTCAAGCAGACTTTTGTCTTGAATACTTCAGCATGGAATAATAGAGTAGGACTTTGGTTCTATTTTGTTGGTTTGTGAACCTTAGTAATGGTTAATAGGAACGGTTGGGGGCATTCGTATT
MagnaDeer12C	Netherlands	Capreolus capreolus		Babesia capreoli	no ambiguous nucleotides	AAATAACAATACAGGGCAATTGTCTTGTAATTGGAATGATGGTGACCTAAACCCTCACCAGAGTAACAATTGGAGGGCAAGTCTGGTGCCAGCAGCCGCGGTAATTCCAGCTCCAATAGCGTATATTAAACTTGTTGCAGTTAAAAAGCTCGTAGTTGAATTTTTGCGTGGTGTTAATATTGACTGATGTCGAGATTGCACTTCGCTTTTGGGATTTTTCCCTTTTTACTTTGAGAAAATTAGAGTGTTTCAAGCAGACTTTTGTCTTGAATACTTCAGCATGGAATAATAGAGTAGGACTTTGGTTCTATTTTGTTGGTTTGTGAACCTTAGTAATGGTTAATAGGAACGGTTGGGGGCATTCGTATT
MagnaDeer12D	Netherlands	Capreolus capreolus		Babesia capreoli	no ambiguous nucleotides	AAATAACAATACAGGGCAATTGTCTTGTAATTGGAATGATGGTGACCTAAACCCTCACCAGAGTAACAATTGGAGGGCAAGTCTGGTGCCAGCAGCCGCGGTAATTCCAGCTCCAATAGCGTATATTAAACTTGTTGCAGTTAAAAAGCTCGTAGTTGAATTTTTGCGTGGTGTTAATATTGACTGATGTCGAGATTGCACTTCGCTTTTGGGATTTTTCCCTTTTTACTTTGAGAAAATTAGAGTGTTTCAAGCAGACTTTTGTCTTGAATACTTCAGCATGGAATAATAGAGTAGGACTTTGGTTCTATTTTGTTGGTTTGTGAACCTTAGTAATGGTTAATAGGAACGGTTGGGGGCATTCGTATT
MagnaDeer12E	Netherlands	Capreolus capreolus		Babesia capreoli	no ambiguous nucleotides	AAATAACAATACAGGGCAATTGTCTTGTAATTGGAATGATGGTGACCTAAACCCTCACCAGAGTAACAATTGGAGGGCAAGTCTGGTGCCAGCAGCCGCGGTAATTCCAGCTCCAATAGCGTATATTAAACTTGTTGCAGTTAAAAAGCTCGTAGTTGAATTTTTGCGTGGTGTTAATATTGACTGATGTCGAGATTGCACTTCGCTTTTGGGATTTTTCCCTTTTTACTTTGAGAAAATTAGAGTGTTTCAAGCAGACTTTTGTCTTGAATACTTCAGCATGGAATAATAGAGTAGGACTTTGGTTCTATTTTGTTGGTTTGTGAACCTTAGTAATGGTTAATAGGAACGGTTGGGGGCATTCGTATT
MagnaDeer12F	Netherlands	Capreolus capreolus		Babesia capreoli	no ambiguous nucleotides	AAATAACAATACAGGGCAATTGTCTTGTAATTGGAATGATGGTGACCTAAACCCTCACCAGAGTAACAATTGGAGGGCAAGTCTGGTGCCAGCAGCCGCGGTAATTCCAGCTCCAATAGCGTATATTAAACTTGTTGCAGTTAAAAAGCTCGTAGTTGAATTTTTGCGTGGTGTTAATATTGACTGATGTCGAGATTGCACTTCGCTTTTGGGATTTTTCCCTTTTTACTTTGAGAAAATTAGAGTGTTTCAAGCAGACTTTTGTCTTGAATACTTCAGCATGGAATAATAGAGTAGGACTTTGGTTCTATTTTGTTGGTTTGTGAACCTTAGTAATGGTTAATAGGAACGGTTGGGGGCATTCGTATT
MagnaDeer12H	Netherlands	Capreolus capreolus		Babesia capreoli	no ambiguous nucleotides	AAATAACAATACAGGGCAATTGTCTTGTAATTGGAATGATGGTGACCTAAACCCTCACCAGAGTAACAATTGGAGGGCAAGTCTGGTGCCAGCAGCCGCGGTAATTCCAGCTCCAATAGCGTATATTAAACTTGTTGCAGTTAAAAAGCTCGTAGTTGAATTTTTGCGTGGTGTTAATATTGACTGATGTCGAGATTGCACTTCGCTTTTGGGATTTTTCCCTTTTTACTTTGAGAAAATTAGAGTGTTTCAAGCAGACTTTTGTCTTGAATACTTCAGCATGGAATAATAGAGTAGGACTTTGGTTCTATTTTGTTGGTTTGTGAACCTTAGTAATGGTTAATAGGAACGGTTGGGGGCATTCGTATT
MagnaDeer13B	Netherlands	Capreolus capreolus		Babesia capreoli	no ambiguous nucleotides	AAATAACAATACAGGGCAATTGTCTTGTAATTGGAATGATGGTGACCTAAACCCTCACCAGAGTAACAATTGGAGGGCAAGTCTGGTGCCAGCAGCCGCGGTAATTCCAGCTCCAATAGCGTATATTAAACTTGTTGCAGTTAAAAAGCTCGTAGTTGAATTTTTGCGTGGTGTTAATATTGACTGATGTCGAGATTGCACTTCGCTTTTGGGATTTTTCCCTTTTTACTTTGAGAAAATTAGAGTGTTTCAAGCAGACTTTTGTCTTGAATACTTCAGCATGGAATAATAGAGTAGGACTTTGGTTCTATTTTGTTGGTTTGTGAACCTTAGTAATGGTTAATAGGAACGGTTGGGGGCATTCGTATT
MagnaDeer13C	Netherlands	Capreolus capreolus		Babesia capreoli	no ambiguous nucleotides	AAATAACAATACAGGGCAATTGTCTTGTAATTGGAATGATGGTGACCTAAACCCTCACCAGAGTAACAATTGGAGGGCAAGTCTGGTGCCAGCAGCCGCGGTAATTCCAGCTCCAATAGCGTATATTAAACTTGTTGCAGTTAAAAAGCTCGTAGTTGAATTTTTGCGTGGTGTTAATATTGACTGATGTCGAGATTGCACTTCGCTTTTGGGATTTTTCCCTTTTTACTTTGAGAAAATTAGAGTGTTTCAAGCAGACTTTTGTCTTGAATACTTCAGCATGGAATAATAGAGTAGGACTTTGGTTCTATTTTGTTGGTTTGTGAACCTTAGTAATGGTTAATAGGAACGGTTGGGGGCATTCGTATT
MagnaDeer13G	Netherlands	Capreolus capreolus		Babesia capreoli	no ambiguous nucleotides	AAATAACAATACAGGGCAATTGTCTTGTAATTGGAATGATGGTGACCTAAACCCTCACCAGAGTAACAATTGGAGGGCAAGTCTGGTGCCAGCAGCCGCGGTAATTCCAGCTCCAATAGCGTATATTAAACTTGTTGCAGTTAAAAAGCTCGTAGTTGAATTTTTGCGTGGTGTTAATATTGACTGATGTCGAGATTGCACTTCGCTTTTGGGATTTTTCCCTTTTTACTTTGAGAAAATTAGAGTGTTTCAAGCAGACTTTTGTCTTGAATACTTCAGCATGGAATAATAGAGTAGGACTTTGGTTCTATTTTGTTGGTTTGTGAACCTTAGTAATGGTTAATAGGAACGGTTGGGGGCATTCGTATT
MagnaDeer13H	Netherlands	Capreolus capreolus		Babesia capreoli	no ambiguous nucleotides	AAATAACAATACAGGGCAATTGTCTTGTAATTGGAATGATGGTGACCTAAACCCTCACCAGAGTAACAATTGGAGGGCAAGTCTGGTGCCAGCAGCCGCGGTAATTCCAGCTCCAATAGCGTATATTAAACTTGTTGCAGTTAAAAAGCTCGTAGTTGAATTTTTGCGTGGTGTTAATATTGACTGATGTCGAGATTGCACTTCGCTTTTGGGATTTTTCCCTTTTTACTTTGAGAAAATTAGAGTGTTTCAAGCAGACTTTTGTCTTGAATACTTCAGCATGGAATAATAGAGTAGGACTTTGGTTCTATTTTGTTGGTTTGTGAACCTTAGTAATGGTTAATAGGAACGGTTGGGGGCATTCGTATT
MagnaDeer14C	Netherlands	Capreolus capreolus		Babesia capreoli	no ambiguous nucleotides	AAATAACAATACAGGGCAATTGTCTTGTAATTGGAATGATGGTGACCTAAACCCTCACCAGAGTAACAATTGGAGGGCAAGTCTGGTGCCAGCAGCCGCGGTAATTCCAGCTCCAATAGCGTATATTAAACTTGTTGCAGTTAAAAAGCTCGTAGTTGAATTTTTGCGTGGTGTTAATATTGACTGATGTCGAGATTGCACTTCGCTTTTGGGATTTTTCCCTTTTTACTTTGAGAAAATTAGAGTGTTTCAAGCAGACTTTTGTCTTGAATACTTCAGCATGGAATAATAGAGTAGGACTTTGGTTCTATTTTGTTGGTTTGTGAACCTTAGTAATGGTTAATAGGAACGGTTGGGGGCATTCGTATT
MagnaDeer14D	Netherlands	Capreolus capreolus		Babesia capreoli	no ambiguous nucleotides	AAATAACAATACAGGGCAATTGTCTTGTAATTGGAATGATGGTGACCTAAACCCTCACCAGAGTAACAATTGGAGGGCAAGTCTGGTGCCAGCAGCCGCGGTAATTCCAGCTCCAATAGCGTATATTAAACTTGTTGCAGTTAAAAAGCTCGTAGTTGAATTTTTGCGTGGTGTTAATATTGACTGATGTCGAGATTGCACTTCGCTTTTGGGATTTTTCCCTTTTTACTTTGAGAAAATTAGAGTGTTTCAAGCAGACTTTTGTCTTGAATACTTCAGCATGGAATAATAGAGTAGGACTTTGGTTCTATTTTGTTGGTTTGTGAACCTTAGTAATGGTTAATAGGAACGGTTGGGGGCATTCGTATT
MagnaDeer14H	Netherlands	Capreolus capreolus		Babesia capreoli	no ambiguous nucleotides	AAATAACAATACAGGGCAATTGTCTTGTAATTGGAATGATGGTGACCTAAACCCTCACCAGAGTAACAATTGGAGGGCAAGTCTGGTGCCAGCAGCCGCGGTAATTCCAGCTCCAATAGCGTATATTAAACTTGTTGCAGTTAAAAAGCTCGTAGTTGAATTTTTGCGTGGTGTTAATATTGACTGATGTCGAGATTGCACTTCGCTTTTGGGATTTTTCCCTTTTTACTTTGAGAAAATTAGAGTGTTTCAAGCAGACTTTTGTCTTGAATACTTCAGCATGGAATAATAGAGTAGGACTTTGGTTCTATTTTGTTGGTTTGTGAACCTTAGTAATGGTTAATAGGAACGGTTGGGGGCATTCGTATT
MagnaDeer15B	Netherlands	Capreolus capreolus		Babesia capreoli	no ambiguous nucleotides	AAATAACAATACAGGGCAATTGTCTTGTAATTGGAATGATGGTGACCTAAACCCTCACCAGAGTAACAATTGGAGGGCAAGTCTGGTGCCAGCAGCCGCGGTAATTCCAGCTCCAATAGCGTATATTAAACTTGTTGCAGTTAAAAAGCTCGTAGTTGAATTTTTGCGTGGTGTTAATATTGACTGATGTCGAGATTGCACTTCGCTTTTGGGATTTTTCCCTTTTTACTTTGAGAAAATTAGAGTGTTTCAAGCAGACTTTTGTCTTGAATACTTCAGCATGGAATAATAGAGTAGGACTTTGGTTCTATTTTGTTGGTTTGTGAACCTTAGTAATGGTTAATAGGAACGGTTGGGGGCATTCGTATT
MagnaDeer15E	Netherlands	Capreolus capreolus		Babesia capreoli	no ambiguous nucleotides	AAATAACAATACAGGGCAATTGTCTTGTAATTGGAATGATGGTGACCTAAACCCTCACCAGAGTAACAATTGGAGGGCAAGTCTGGTGCCAGCAGCCGCGGTAATTCCAGCTCCAATAGCGTATATTAAACTTGTTGCAGTTAAAAAGCTCGTAGTTGAATTTTTGCGTGGTGTTAATATTGACTGATGTCGAGATTGCACTTCGCTTTTGGGATTTTTCCCTTTTTACTTTGAGAAAATTAGAGTGTTTCAAGCAGACTTTTGTCTTGAATACTTCAGCATGGAATAATAGAGTAGGACTTTGGTTCTATTTTGTTGGTTTGTGAACCTTAGTAATGGTTAATAGGAACGGTTGGGGGCATTCGTATT
MagnaDeer15F	Netherlands	Capreolus capreolus		Babesia capreoli	no ambiguous nucleotides	AAATAACAATACAGGGCAATTGTCTTGTAATTGGAATGATGGTGACCTAAACCCTCACCAGAGTAACAATTGGAGGGCAAGTCTGGTGCCAGCAGCCGCGGTAATTCCAGCTCCAATAGCGTATATTAAACTTGTTGCAGTTAAAAAGCTCGTAGTTGAATTTTTGCGTGGTGTTAATATTGACTGATGTCGAGATTGCACTTCGCTTTTGGGATTTTTCCCTTTTTACTTTGAGAAAATTAGAGTGTTTCAAGCAGACTTTTGTCTTGAATACTTCAGCATGGAATAATAGAGTAGGACTTTGGTTCTATTTTGTTGGTTTGTGAACCTTAGTAATGGTTAATAGGAACGGTTGGGGGCATTCGTATT
MagnaDeer16B	Netherlands	Capreolus capreolus		Babesia capreoli	no ambiguous nucleotides	AAATAACAATACAGGGCAATTGTCTTGTAATTGGAATGATGGTGACCTAAACCCTCACCAGAGTAACAATTGGAGGGCAAGTCTGGTGCCAGCAGCCGCGGTAATTCCAGCTCCAATAGCGTATATTAAACTTGTTGCAGTTAAAAAGCTCGTAGTTGAATTTTTGCGTGGTGTTAATATTGACTGATGTCGAGATTGCACTTCGCTTTTGGGATTTTTCCCTTTTTACTTTGAGAAAATTAGAGTGTTTCAAGCAGACTTTTGTCTTGAATACTTCAGCATGGAATAATAGAGTAGGACTTTGGTTCTATTTTGTTGGTTTGTGAACCTTAGTAATGGTTAATAGGAACGGTTGGGGGCATTCGTATT
MagnaDeer16D	Netherlands	Capreolus capreolus		Babesia capreoli	no ambiguous nucleotides	AAATAACAATACAGGGCAATTGTCTTGTAATTGGAATGATGGTGACCTAAACCCTCACCAGAGTAACAATTGGAGGGCAAGTCTGGTGCCAGCAGCCGCGGTAATTCCAGCTCCAATAGCGTATATTAAACTTGTTGCAGTTAAAAAGCTCGTAGTTGAATTTTTGCGTGGTGTTAATATTGACTGATGTCGAGATTGCACTTCGCTTTTGGGATTTTTCCCTTTTTACTTTGAGAAAATTAGAGTGTTTCAAGCAGACTTTTGTCTTGAATACTTCAGCATGGAATAATAGAGTAGGACTTTGGTTCTATTTTGTTGGTTTGTGAACCTTAGTAATGGTTAATAGGAACGGTTGGGGGCATTCGTATT
MagnaDeer16F	Netherlands	Capreolus capreolus		Babesia capreoli	no ambiguous nucleotides	AAATAACAATACAGGGCAATTGTCTTGTAATTGGAATGATGGTGACCTAAACCCTCACCAGAGTAACAATTGGAGGGCAAGTCTGGTGCCAGCAGCCGCGGTAATTCCAGCTCCAATAGCGTATATTAAACTTGTTGCAGTTAAAAAGCTCGTAGTTGAATTTTTGCGTGGTGTTAATATTGACTGATGTCGAGATTGCACTTCGCTTTTGGGATTTTTCCCTTTTTACTTTGAGAAAATTAGAGTGTTTCAAGCAGACTTTTGTCTTGAATACTTCAGCATGGAATAATAGAGTAGGACTTTGGTTCTATTTTGTTGGTTTGTGAACCTTAGTAATGGTTAATAGGAACGGTTGGGGGCATTCGTATT
MagnaDeer16G	Netherlands	Capreolus capreolus		Babesia capreoli	no ambiguous nucleotides	AAATAACAATACAGGGCAATTGTCTTGTAATTGGAATGATGGTGACCTAAACCCTCACCAGAGTAACAATTGGAGGGCAAGTCTGGTGCCAGCAGCCGCGGTAATTCCAGCTCCAATAGCGTATATTAAACTTGTTGCAGTTAAAAAGCTCGTAGTTGAATTTTTGCGTGGTGTTAATATTGACTGATGTCGAGATTGCACTTCGCTTTTGGGATTTTTCCCTTTTTACTTTGAGAAAATTAGAGTGTTTCAAGCAGACTTTTGTCTTGAATACTTCAGCATGGAATAATAGAGTAGGACTTTGGTTCTATTTTGTTGGTTTGTGAACCTTAGTAATGGTTAATAGGAACGGTTGGGGGCATTCGTATT
MagnaDeer16H	Netherlands	Capreolus capreolus		Babesia capreoli	no ambiguous nucleotides	AAATAACAATACAGGGCAATTGTCTTGTAATTGGAATGATGGTGACCTAAACCCTCACCAGAGTAACAATTGGAGGGCAAGTCTGGTGCCAGCAGCCGCGGTAATTCCAGCTCCAATAGCGTATATTAAACTTGTTGCAGTTAAAAAGCTCGTAGTTGAATTTTTGCGTGGTGTTAATATTGACTGATGTCGAGATTGCACTTCGCTTTTGGGATTTTTCCCTTTTTACTTTGAGAAAATTAGAGTGTTTCAAGCAGACTTTTGTCTTGAATACTTCAGCATGGAATAATAGAGTAGGACTTTGGTTCTATTTTGTTGGTTTGTGAACCTTAGTAATGGTTAATAGGAACGGTTGGGGGCATTCGTATT
MagnaDeer17G	Netherlands	Capreolus capreolus		Babesia capreoli	no ambiguous nucleotides	AAATAACAATACAGGGCAATTGTCTTGTAATTGGAATGATGGTGACCTAAACCCTCACCAGAGTAACAATTGGAGGGCAAGTCTGGTGCCAGCAGCCGCGGTAATTCCAGCTCCAATAGCGTATATTAAACTTGTTGCAGTTAAAAAGCTCGTAGTTGAATTTTTGCGTGGTGTTAATATTGACTGATGTCGAGATTGCACTTCGCTTTTGGGATTTTTCCCTTTTTACTTTGAGAAAATTAGAGTGTTTCAAGCAGACTTTTGTCTTGAATACTTCAGCATGGAATAATAGAGTAGGACTTTGGTTCTATTTTGTTGGTTTGTGAACCTTAGTAATGGTTAATAGGAACGGTTGGGGGCATTCGTATT
MagnaDeer18D	Netherlands	Capreolus capreolus		Babesia capreoli	no ambiguous nucleotides	AAATAACAATACAGGGCAATTGTCTTGTAATTGGAATGATGGTGACCTAAACCCTCACCAGAGTAACAATTGGAGGGCAAGTCTGGTGCCAGCAGCCGCGGTAATTCCAGCTCCAATAGCGTATATTAAACTTGTTGCAGTTAAAAAGCTCGTAGTTGAATTTTTGCGTGGTGTTAATATTGACTGATGTCGAGATTGCACTTCGCTTTTGGGATTTTTCCCTTTTTACTTTGAGAAAATTAGAGTGTTTCAAGCAGACTTTTGTCTTGAATACTTCAGCATGGAATAATAGAGTAGGACTTTGGTTCTATTTTGTTGGTTTGTGAACCTTAGTAATGGTTAATAGGAACGGTTGGGGGCATTCGTATT
MagnaDeer18E	Netherlands	Capreolus capreolus		Babesia capreoli	no ambiguous nucleotides	AAATAACAATACAGGGCAATTGTCTTGTAATTGGAATGATGGTGACCTAAACCCTCACCAGAGTAACAATTGGAGGGCAAGTCTGGTGCCAGCAGCCGCGGTAATTCCAGCTCCAATAGCGTATATTAAACTTGTTGCAGTTAAAAAGCTCGTAGTTGAATTTTTGCGTGGTGTTAATATTGACTGATGTCGAGATTGCACTTCGCTTTTGGGATTTTTCCCTTTTTACTTTGAGAAAATTAGAGTGTTTCAAGCAGACTTTTGTCTTGAATACTTCAGCATGGAATAATAGAGTAGGACTTTGGTTCTATTTTGTTGGTTTGTGAACCTTAGTAATGGTTAATAGGAACGGTTGGGGGCATTCGTATT
MagnaDeer18F	Netherlands	Capreolus capreolus		Babesia capreoli	no ambiguous nucleotides	AAATAACAATACAGGGCAATTGTCTTGTAATTGGAATGATGGTGACCTAAACCCTCACCAGAGTAACAATTGGAGGGCAAGTCTGGTGCCAGCAGCCGCGGTAATTCCAGCTCCAATAGCGTATATTAAACTTGTTGCAGTTAAAAAGCTCGTAGTTGAATTTTTGCGTGGTGTTAATATTGACTGATGTCGAGATTGCACTTCGCTTTTGGGATTTTTCCCTTTTTACTTTGAGAAAATTAGAGTGTTTCAAGCAGACTTTTGTCTTGAATACTTCAGCATGGAATAATAGAGTAGGACTTTGGTTCTATTTTGTTGGTTTGTGAACCTTAGTAATGGTTAATAGGAACGGTTGGGGGCATTCGTATT
MagnaDeer18G	Netherlands	Capreolus capreolus		Babesia capreoli	no ambiguous nucleotides	AAATAACAATACAGGGCAATTGTCTTGTAATTGGAATGATGGTGACCTAAACCCTCACCAGAGTAACAATTGGAGGGCAAGTCTGGTGCCAGCAGCCGCGGTAATTCCAGCTCCAATAGCGTATATTAAACTTGTTGCAGTTAAAAAGCTCGTAGTTGAATTTTTGCGTGGTGTTAATATTGACTGATGTCGAGATTGCACTTCGCTTTTGGGATTTTTCCCTTTTTACTTTGAGAAAATTAGAGTGTTTCAAGCAGACTTTTGTCTTGAATACTTCAGCATGGAATAATAGAGTAGGACTTTGGTTCTATTTTGTTGGTTTGTGAACCTTAGTAATGGTTAATAGGAACGGTTGGGGGCATTCGTATT
MagnaDeer19A	Netherlands	Capreolus capreolus		Babesia capreoli	no ambiguous nucleotides	AAATAACAATACAGGGCAATTGTCTTGTAATTGGAATGATGGTGACCTAAACCCTCACCAGAGTAACAATTGGAGGGCAAGTCTGGTGCCAGCAGCCGCGGTAATTCCAGCTCCAATAGCGTATATTAAACTTGTTGCAGTTAAAAAGCTCGTAGTTGAATTTTTGCGTGGTGTTAATATTGACTGATGTCGAGATTGCACTTCGCTTTTGGGATTTTTCCCTTTTTACTTTGAGAAAATTAGAGTGTTTCAAGCAGACTTTTGTCTTGAATACTTCAGCATGGAATAATAGAGTAGGACTTTGGTTCTATTTTGTTGGTTTGTGAACCTTAGTAATGGTTAATAGGAACGGTTGGGGGCATTCGTATT
MagnaDeer19E	Netherlands	Capreolus capreolus		Babesia capreoli	no ambiguous nucleotides	AAATAACAATACAGGGCAATTGTCTTGTAATTGGAATGATGGTGACCTAAACCCTCACCAGAGTAACAATTGGAGGGCAAGTCTGGTGCCAGCAGCCGCGGTAATTCCAGCTCCAATAGCGTATATTAAACTTGTTGCAGTTAAAAAGCTCGTAGTTGAATTTTTGCGTGGTGTTAATATTGACTGATGTCGAGATTGCACTTCGCTTTTGGGATTTTTCCCTTTTTACTTTGAGAAAATTAGAGTGTTTCAAGCAGACTTTTGTCTTGAATACTTCAGCATGGAATAATAGAGTAGGACTTTGGTTCTATTTTGTTGGTTTGTGAACCTTAGTAATGGTTAATAGGAACGGTTGGGGGCATTCGTATT
MagnaDeer1E	Netherlands	Capreolus capreolus		Babesia capreoli	no ambiguous nucleotides	AAATAACAATACAGGGCAATTGTCTTGTAATTGGAATGATGGTGACCTAAACCCTCACCAGAGTAACAATTGGAGGGCAAGTCTGGTGCCAGCAGCCGCGGTAATTCCAGCTCCAATAGCGTATATTAAACTTGTTGCAGTTAAAAAGCTCGTAGTTGAATTTTTGCGTGGTGTTAATATTGACTGATGTCGAGATTGCACTTCGCTTTTGGGATTTTTCCCTTTTTACTTTGAGAAAATTAGAGTGTTTCAAGCAGACTTTTGTCTTGAATACTTCAGCATGGAATAATAGAGTAGGACTTTGGTTCTATTTTGTTGGTTTGTGAACCTTAGTAATGGTTAATAGGAACGGTTGGGGGCATTCGTATT
MagnaDeer1H	Netherlands	Capreolus capreolus		Babesia capreoli	no ambiguous nucleotides	AAATAACAATACAGGGCAATTGTCTTGTAATTGGAATGATGGTGACCTAAACCCTCACCAGAGTAACAATTGGAGGGCAAGTCTGGTGCCAGCAGCCGCGGTAATTCCAGCTCCAATAGCGTATATTAAACTTGTTGCAGTTAAAAAGCTCGTAGTTGAATTTTTGCGTGGTGTTAATATTGACTGATGTCGAGATTGCACTTCGCTTTTGGGATTTTTCCCTTTTTACTTTGAGAAAATTAGAGTGTTTCAAGCAGACTTTTGTCTTGAATACTTCAGCATGGAATAATAGAGTAGGACTTTGGTTCTATTTTGTTGGTTTGTGAACCTTAGTAATGGTTAATAGGAACGGTTGGGGGCATTCGTATT
MagnaDeer20B	Netherlands	Capreolus capreolus		Babesia capreoli	no ambiguous nucleotides	AAATAACAATACAGGGCAATTGTCTTGTAATTGGAATGATGGTGACCTAAACCCTCACCAGAGTAACAATTGGAGGGCAAGTCTGGTGCCAGCAGCCGCGGTAATTCCAGCTCCAATAGCGTATATTAAACTTGTTGCAGTTAAAAAGCTCGTAGTTGAATTTTTGCGTGGTGTTAATATTGACTGATGTCGAGATTGCACTTCGCTTTTGGGATTTTTCCCTTTTTACTTTGAGAAAATTAGAGTGTTTCAAGCAGACTTTTGTCTTGAATACTTCAGCATGGAATAATAGAGTAGGACTTTGGTTCTATTTTGTTGGTTTGTGAACCTTAGTAATGGTTAATAGGAACGGTTGGGGGCATTCGTATT
MagnaDeer20C	Netherlands	Capreolus capreolus		Babesia capreoli	no ambiguous nucleotides	AAATAACAATACAGGGCAATTGTCTTGTAATTGGAATGATGGTGACCTAAACCCTCACCAGAGTAACAATTGGAGGGCAAGTCTGGTGCCAGCAGCCGCGGTAATTCCAGCTCCAATAGCGTATATTAAACTTGTTGCAGTTAAAAAGCTCGTAGTTGAATTTTTGCGTGGTGTTAATATTGACTGATGTCGAGATTGCACTTCGCTTTTGGGATTTTTCCCTTTTTACTTTGAGAAAATTAGAGTGTTTCAAGCAGACTTTTGTCTTGAATACTTCAGCATGGAATAATAGAGTAGGACTTTGGTTCTATTTTGTTGGTTTGTGAACCTTAGTAATGGTTAATAGGAACGGTTGGGGGCATTCGTATT
MagnaDeer20F	Netherlands	Capreolus capreolus		Babesia capreoli	no ambiguous nucleotides	AAATAACAATACAGGGCAATTGTCTTGTAATTGGAATGATGGTGACCTAAACCCTCACCAGAGTAACAATTGGAGGGCAAGTCTGGTGCCAGCAGCCGCGGTAATTCCAGCTCCAATAGCGTATATTAAACTTGTTGCAGTTAAAAAGCTCGTAGTTGAATTTTTGCGTGGTGTTAATATTGACTGATGTCGAGATTGCACTTCGCTTTTGGGATTTTTCCCTTTTTACTTTGAGAAAATTAGAGTGTTTCAAGCAGACTTTTGTCTTGAATACTTCAGCATGGAATAATAGAGTAGGACTTTGGTTCTATTTTGTTGGTTTGTGAACCTTAGTAATGGTTAATAGGAACGGTTGGGGGCATTCGTATT
MagnaDeer21H	Netherlands	Capreolus capreolus		Babesia capreoli	no ambiguous nucleotides	AAATAACAATACAGGGCAATTGTCTTGTAATTGGAATGATGGTGACCTAAACCCTCACCAGAGTAACAATTGGAGGGCAAGTCTGGTGCCAGCAGCCGCGGTAATTCCAGCTCCAATAGCGTATATTAAACTTGTTGCAGTTAAAAAGCTCGTAGTTGAATTTTTGCGTGGTGTTAATATTGACTGATGTCGAGATTGCACTTCGCTTTTGGGATTTTTCCCTTTTTACTTTGAGAAAATTAGAGTGTTTCAAGCAGACTTTTGTCTTGAATACTTCAGCATGGAATAATAGAGTAGGACTTTGGTTCTATTTTGTTGGTTTGTGAACCTTAGTAATGGTTAATAGGAACGGTTGGGGGCATTCGTATT
MagnaDeer22E	Netherlands	Capreolus capreolus		Babesia capreoli	no ambiguous nucleotides	AAATAACAATACAGGGCAATTGTCTTGTAATTGGAATGATGGTGACCTAAACCCTCACCAGAGTAACAATTGGAGGGCAAGTCTGGTGCCAGCAGCCGCGGTAATTCCAGCTCCAATAGCGTATATTAAACTTGTTGCAGTTAAAAAGCTCGTAGTTGAATTTTTGCGTGGTGTTAATATTGACTGATGTCGAGATTGCACTTCGCTTTTGGGATTTTTCCCTTTTTACTTTGAGAAAATTAGAGTGTTTCAAGCAGACTTTTGTCTTGAATACTTCAGCATGGAATAATAGAGTAGGACTTTGGTTCTATTTTGTTGGTTTGTGAACCTTAGTAATGGTTAATAGGAACGGTTGGGGGCATTCGTATT
MagnaDeer22G	Netherlands	Capreolus capreolus		Babesia capreoli	no ambiguous nucleotides	AAATAACAATACAGGGCAATTGTCTTGTAATTGGAATGATGGTGACCTAAACCCTCACCAGAGTAACAATTGGAGGGCAAGTCTGGTGCCAGCAGCCGCGGTAATTCCAGCTCCAATAGCGTATATTAAACTTGTTGCAGTTAAAAAGCTCGTAGTTGAATTTTTGCGTGGTGTTAATATTGACTGATGTCGAGATTGCACTTCGCTTTTGGGATTTTTCCCTTTTTACTTTGAGAAAATTAGAGTGTTTCAAGCAGACTTTTGTCTTGAATACTTCAGCATGGAATAATAGAGTAGGACTTTGGTTCTATTTTGTTGGTTTGTGAACCTTAGTAATGGTTAATAGGAACGGTTGGGGGCATTCGTATT
MagnaDeer22H	Netherlands	Capreolus capreolus		Babesia capreoli	no ambiguous nucleotides	AAATAACAATACAGGGCAATTGTCTTGTAATTGGAATGATGGTGACCTAAACCCTCACCAGAGTAACAATTGGAGGGCAAGTCTGGTGCCAGCAGCCGCGGTAATTCCAGCTCCAATAGCGTATATTAAACTTGTTGCAGTTAAAAAGCTCGTAGTTGAATTTTTGCGTGGTGTTAATATTGACTGATGTCGAGATTGCACTTCGCTTTTGGGATTTTTCCCTTTTTACTTTGAGAAAATTAGAGTGTTTCAAGCAGACTTTTGTCTTGAATACTTCAGCATGGAATAATAGAGTAGGACTTTGGTTCTATTTTGTTGGTTTGTGAACCTTAGTAATGGTTAATAGGAACGGTTGGGGGCATTCGTATT
MagnaDeer23A	Netherlands	Capreolus capreolus		Babesia capreoli	no ambiguous nucleotides	AAATAACAATACAGGGCAATTGTCTTGTAATTGGAATGATGGTGACCTAAACCCTCACCAGAGTAACAATTGGAGGGCAAGTCTGGTGCCAGCAGCCGCGGTAATTCCAGCTCCAATAGCGTATATTAAACTTGTTGCAGTTAAAAAGCTCGTAGTTGAATTTTTGCGTGGTGTTAATATTGACTGATGTCGAGATTGCACTTCGCTTTTGGGATTTTTCCCTTTTTACTTTGAGAAAATTAGAGTGTTTCAAGCAGACTTTTGTCTTGAATACTTCAGCATGGAATAATAGAGTAGGACTTTGGTTCTATTTTGTTGGTTTGTGAACCTTAGTAATGGTTAATAGGAACGGTTGGGGGCATTCGTATT
MagnaDeer23C	Netherlands	Capreolus capreolus		Babesia capreoli	no ambiguous nucleotides	AAATAACAATACAGGGCAATTGTCTTGTAATTGGAATGATGGTGACCTAAACCCTCACCAGAGTAACAATTGGAGGGCAAGTCTGGTGCCAGCAGCCGCGGTAATTCCAGCTCCAATAGCGTATATTAAACTTGTTGCAGTTAAAAAGCTCGTAGTTGAATTTTTGCGTGGTGTTAATATTGACTGATGTCGAGATTGCACTTCGCTTTTGGGATTTTTCCCTTTTTACTTTGAGAAAATTAGAGTGTTTCAAGCAGACTTTTGTCTTGAATACTTCAGCATGGAATAATAGAGTAGGACTTTGGTTCTATTTTGTTGGTTTGTGAACCTTAGTAATGGTTAATAGGAACGGTTGGGGGCATTCGTATT
MagnaDeer23E	Netherlands	Capreolus capreolus		Babesia capreoli	no ambiguous nucleotides	AAATAACAATACAGGGCAATTGTCTTGTAATTGGAATGATGGTGACCTAAACCCTCACCAGAGTAACAATTGGAGGGCAAGTCTGGTGCCAGCAGCCGCGGTAATTCCAGCTCCAATAGCGTATATTAAACTTGTTGCAGTTAAAAAGCTCGTAGTTGAATTTTTGCGTGGTGTTAATATTGACTGATGTCGAGATTGCACTTCGCTTTTGGGATTTTTCCCTTTTTACTTTGAGAAAATTAGAGTGTTTCAAGCAGACTTTTGTCTTGAATACTTCAGCATGGAATAATAGAGTAGGACTTTGGTTCTATTTTGTTGGTTTGTGAACCTTAGTAATGGTTAATAGGAACGGTTGGGGGCATTCGTATT
MagnaDeer23G	Netherlands	Capreolus capreolus		Babesia capreoli	no ambiguous nucleotides	AAATAACAATACAGGGCAATTGTCTTGTAATTGGAATGATGGTGACCTAAACCCTCACCAGAGTAACAATTGGAGGGCAAGTCTGGTGCCAGCAGCCGCGGTAATTCCAGCTCCAATAGCGTATATTAAACTTGTTGCAGTTAAAAAGCTCGTAGTTGAATTTTTGCGTGGTGTTAATATTGACTGATGTCGAGATTGCACTTCGCTTTTGGGATTTTTCCCTTTTTACTTTGAGAAAATTAGAGTGTTTCAAGCAGACTTTTGTCTTGAATACTTCAGCATGGAATAATAGAGTAGGACTTTGGTTCTATTTTGTTGGTTTGTGAACCTTAGTAATGGTTAATAGGAACGGTTGGGGGCATTCGTATT
MagnaDeer24A	Netherlands	Capreolus capreolus		Babesia capreoli	no ambiguous nucleotides	AAATAACAATACAGGGCAATTGTCTTGTAATTGGAATGATGGTGACCTAAACCCTCACCAGAGTAACAATTGGAGGGCAAGTCTGGTGCCAGCAGCCGCGGTAATTCCAGCTCCAATAGCGTATATTAAACTTGTTGCAGTTAAAAAGCTCGTAGTTGAATTTTTGCGTGGTGTTAATATTGACTGATGTCGAGATTGCACTTCGCTTTTGGGATTTTTCCCTTTTTACTTTGAGAAAATTAGAGTGTTTCAAGCAGACTTTTGTCTTGAATACTTCAGCATGGAATAATAGAGTAGGACTTTGGTTCTATTTTGTTGGTTTGTGAACCTTAGTAATGGTTAATAGGAACGGTTGGGGGCATTCGTATT
MagnaDeer24C	Netherlands	Capreolus capreolus		Babesia capreoli	no ambiguous nucleotides	AAATAACAATACAGGGCAATTGTCTTGTAATTGGAATGATGGTGACCTAAACCCTCACCAGAGTAACAATTGGAGGGCAAGTCTGGTGCCAGCAGCCGCGGTAATTCCAGCTCCAATAGCGTATATTAAACTTGTTGCAGTTAAAAAGCTCGTAGTTGAATTTTTGCGTGGTGTTAATATTGACTGATGTCGAGATTGCACTTCGCTTTTGGGATTTTTCCCTTTTTACTTTGAGAAAATTAGAGTGTTTCAAGCAGACTTTTGTCTTGAATACTTCAGCATGGAATAATAGAGTAGGACTTTGGTTCTATTTTGTTGGTTTGTGAACCTTAGTAATGGTTAATAGGAACGGTTGGGGGCATTCGTATT
MagnaDeer24D	Netherlands	Capreolus capreolus		Babesia capreoli	no ambiguous nucleotides	AAATAACAATACAGGGCAATTGTCTTGTAATTGGAATGATGGTGACCTAAACCCTCACCAGAGTAACAATTGGAGGGCAAGTCTGGTGCCAGCAGCCGCGGTAATTCCAGCTCCAATAGCGTATATTAAACTTGTTGCAGTTAAAAAGCTCGTAGTTGAATTTTTGCGTGGTGTTAATATTGACTGATGTCGAGATTGCACTTCGCTTTTGGGATTTTTCCCTTTTTACTTTGAGAAAATTAGAGTGTTTCAAGCAGACTTTTGTCTTGAATACTTCAGCATGGAATAATAGAGTAGGACTTTGGTTCTATTTTGTTGGTTTGTGAACCTTAGTAATGGTTAATAGGAACGGTTGGGGGCATTCGTATT
MagnaDeer24H	Netherlands	Capreolus capreolus		Babesia capreoli	no ambiguous nucleotides	AAATAACAATACAGGGCAATTGTCTTGTAATTGGAATGATGGTGACCTAAACCCTCACCAGAGTAACAATTGGAGGGCAAGTCTGGTGCCAGCAGCCGCGGTAATTCCAGCTCCAATAGCGTATATTAAACTTGTTGCAGTTAAAAAGCTCGTAGTTGAATTTTTGCGTGGTGTTAATATTGACTGATGTCGAGATTGCACTTCGCTTTTGGGATTTTTCCCTTTTTACTTTGAGAAAATTAGAGTGTTTCAAGCAGACTTTTGTCTTGAATACTTCAGCATGGAATAATAGAGTAGGACTTTGGTTCTATTTTGTTGGTTTGTGAACCTTAGTAATGGTTAATAGGAACGGTTGGGGGCATTCGTATT
MagnaDeer28C	Netherlands	Capreolus capreolus		Babesia capreoli	no ambiguous nucleotides	AAATAACAATACAGGGCAATTGTCTTGTAATTGGAATGATGGTGACCTAAACCCTCACCAGAGTAACAATTGGAGGGCAAGTCTGGTGCCAGCAGCCGCGGTAATTCCAGCTCCAATAGCGTATATTAAACTTGTTGCAGTTAAAAAGCTCGTAGTTGAATTTTTGCGTGGTGTTAATATTGACTGATGTCGAGATTGCACTTCGCTTTTGGGATTTTTCCCTTTTTACTTTGAGAAAATTAGAGTGTTTCAAGCAGACTTTTGTCTTGAATACTTCAGCATGGAATAATAGAGTAGGACTTTGGTTCTATTTTGTTGGTTTGTGAACCTTAGTAATGGTTAATAGGAACGGTTGGGGGCATTCGTATT
MagnaDeer28E	Netherlands	Capreolus capreolus		Babesia capreoli	no ambiguous nucleotides	AAATAACAATACAGGGCAATTGTCTTGTAATTGGAATGATGGTGACCTAAACCCTCACCAGAGTAACAATTGGAGGGCAAGTCTGGTGCCAGCAGCCGCGGTAATTCCAGCTCCAATAGCGTATATTAAACTTGTTGCAGTTAAAAAGCTCGTAGTTGAATTTTTGCGTGGTGTTAATATTGACTGATGTCGAGATTGCACTTCGCTTTTGGGATTTTTCCCTTTTTACTTTGAGAAAATTAGAGTGTTTCAAGCAGACTTTTGTCTTGAATACTTCAGCATGGAATAATAGAGTAGGACTTTGGTTCTATTTTGTTGGTTTGTGAACCTTAGTAATGGTTAATAGGAACGGTTGGGGGCATTCGTATT
MagnaDeer28F	Netherlands	Capreolus capreolus		Babesia capreoli	no ambiguous nucleotides	AAATAACAATACAGGGCAATTGTCTTGTAATTGGAATGATGGTGACCTAAACCCTCACCAGAGTAACAATTGGAGGGCAAGTCTGGTGCCAGCAGCCGCGGTAATTCCAGCTCCAATAGCGTATATTAAACTTGTTGCAGTTAAAAAGCTCGTAGTTGAATTTTTGCGTGGTGTTAATATTGACTGATGTCGAGATTGCACTTCGCTTTTGGGATTTTTCCCTTTTTACTTTGAGAAAATTAGAGTGTTTCAAGCAGACTTTTGTCTTGAATACTTCAGCATGGAATAATAGAGTAGGACTTTGGTTCTATTTTGTTGGTTTGTGAACCTTAGTAATGGTTAATAGGAACGGTTGGGGGCATTCGTATT
MagnaDeer29A	Netherlands	Capreolus capreolus		Babesia capreoli	no ambiguous nucleotides	AAATAACAATACAGGGCAATTGTCTTGTAATTGGAATGATGGTGACCTAAACCCTCACCAGAGTAACAATTGGAGGGCAAGTCTGGTGCCAGCAGCCGCGGTAATTCCAGCTCCAATAGCGTATATTAAACTTGTTGCAGTTAAAAAGCTCGTAGTTGAATTTTTGCGTGGTGTTAATATTGACTGATGTCGAGATTGCACTTCGCTTTTGGGATTTTTCCCTTTTTACTTTGAGAAAATTAGAGTGTTTCAAGCAGACTTTTGTCTTGAATACTTCAGCATGGAATAATAGAGTAGGACTTTGGTTCTATTTTGTTGGTTTGTGAACCTTAGTAATGGTTAATAGGAACGGTTGGGGGCATTCGTATT
MagnaDeer29E	Netherlands	Capreolus capreolus		Babesia capreoli	no ambiguous nucleotides	AAATAACAATACAGGGCAATTGTCTTGTAATTGGAATGATGGTGACCTAAACCCTCACCAGAGTAACAATTGGAGGGCAAGTCTGGTGCCAGCAGCCGCGGTAATTCCAGCTCCAATAGCGTATATTAAACTTGTTGCAGTTAAAAAGCTCGTAGTTGAATTTTTGCGTGGTGTTAATATTGACTGATGTCGAGATTGCACTTCGCTTTTGGGATTTTTCCCTTTTTACTTTGAGAAAATTAGAGTGTTTCAAGCAGACTTTTGTCTTGAATACTTCAGCATGGAATAATAGAGTAGGACTTTGGTTCTATTTTGTTGGTTTGTGAACCTTAGTAATGGTTAATAGGAACGGTTGGGGGCATTCGTATT
MagnaDeer29H	Netherlands	Capreolus capreolus		Babesia capreoli	no ambiguous nucleotides	AAATAACAATACAGGGCAATTGTCTTGTAATTGGAATGATGGTGACCTAAACCCTCACCAGAGTAACAATTGGAGGGCAAGTCTGGTGCCAGCAGCCGCGGTAATTCCAGCTCCAATAGCGTATATTAAACTTGTTGCAGTTAAAAAGCTCGTAGTTGAATTTTTGCGTGGTGTTAATATTGACTGATGTCGAGATTGCACTTCGCTTTTGGGATTTTTCCCTTTTTACTTTGAGAAAATTAGAGTGTTTCAAGCAGACTTTTGTCTTGAATACTTCAGCATGGAATAATAGAGTAGGACTTTGGTTCTATTTTGTTGGTTTGTGAACCTTAGTAATGGTTAATAGGAACGGTTGGGGGCATTCGTATT
MagnaDeer2C	Netherlands	Capreolus capreolus		Babesia capreoli	no ambiguous nucleotides	AAATAACAATACAGGGCAATTGTCTTGTAATTGGAATGATGGTGACCTAAACCCTCACCAGAGTAACAATTGGAGGGCAAGTCTGGTGCCAGCAGCCGCGGTAATTCCAGCTCCAATAGCGTATATTAAACTTGTTGCAGTTAAAAAGCTCGTAGTTGAATTTTTGCGTGGTGTTAATATTGACTGATGTCGAGATTGCACTTCGCTTTTGGGATTTTTCCCTTTTTACTTTGAGAAAATTAGAGTGTTTCAAGCAGACTTTTGTCTTGAATACTTCAGCATGGAATAATAGAGTAGGACTTTGGTTCTATTTTGTTGGTTTGTGAACCTTAGTAATGGTTAATAGGAACGGTTGGGGGCATTCGTATT
MagnaDeer2D	Netherlands	Capreolus capreolus		Babesia capreoli	no ambiguous nucleotides	AAATAACAATACAGGGCAATTGTCTTGTAATTGGAATGATGGTGACCTAAACCCTCACCAGAGTAACAATTGGAGGGCAAGTCTGGTGCCAGCAGCCGCGGTAATTCCAGCTCCAATAGCGTATATTAAACTTGTTGCAGTTAAAAAGCTCGTAGTTGAATTTTTGCGTGGTGTTAATATTGACTGATGTCGAGATTGCACTTCGCTTTTGGGATTTTTCCCTTTTTACTTTGAGAAAATTAGAGTGTTTCAAGCAGACTTTTGTCTTGAATACTTCAGCATGGAATAATAGAGTAGGACTTTGGTTCTATTTTGTTGGTTTGTGAACCTTAGTAATGGTTAATAGGAACGGTTGGGGGCATTCGTATT
MagnaDeer2F	Netherlands	Capreolus capreolus		Babesia capreoli	no ambiguous nucleotides	AAATAACAATACAGGGCAATTGTCTTGTAATTGGAATGATGGTGACCTAAACCCTCACCAGAGTAACAATTGGAGGGCAAGTCTGGTGCCAGCAGCCGCGGTAATTCCAGCTCCAATAGCGTATATTAAACTTGTTGCAGTTAAAAAGCTCGTAGTTGAATTTTTGCGTGGTGTTAATATTGACTGATGTCGAGATTGCACTTCGCTTTTGGGATTTTTCCCTTTTTACTTTGAGAAAATTAGAGTGTTTCAAGCAGACTTTTGTCTTGAATACTTCAGCATGGAATAATAGAGTAGGACTTTGGTTCTATTTTGTTGGTTTGTGAACCTTAGTAATGGTTAATAGGAACGGTTGGGGGCATTCGTATT
MagnaDeer2H	Netherlands	Capreolus capreolus		Babesia capreoli	no ambiguous nucleotides	AAATAACAATACAGGGCAATTGTCTTGTAATTGGAATGATGGTGACCTAAACCCTCACCAGAGTAACAATTGGAGGGCAAGTCTGGTGCCAGCAGCCGCGGTAATTCCAGCTCCAATAGCGTATATTAAACTTGTTGCAGTTAAAAAGCTCGTAGTTGAATTTTTGCGTGGTGTTAATATTGACTGATGTCGAGATTGCACTTCGCTTTTGGGATTTTTCCCTTTTTACTTTGAGAAAATTAGAGTGTTTCAAGCAGACTTTTGTCTTGAATACTTCAGCATGGAATAATAGAGTAGGACTTTGGTTCTATTTTGTTGGTTTGTGAACCTTAGTAATGGTTAATAGGAACGGTTGGGGGCATTCGTATT
MagnaDeer33B	Netherlands	Capreolus capreolus		Babesia capreoli	no ambiguous nucleotides	AAATAACAATACAGGGCAATTGTCTTGTAATTGGAATGATGGTGACCTAAACCCTCACCAGAGTAACAATTGGAGGGCAAGTCTGGTGCCAGCAGCCGCGGTAATTCCAGCTCCAATAGCGTATATTAAACTTGTTGCAGTTAAAAAGCTCGTAGTTGAATTTTTGCGTGGTGTTAATATTGACTGATGTCGAGATTGCACTTCGCTTTTGGGATTTTTCCCTTTTTACTTTGAGAAAATTAGAGTGTTTCAAGCAGACTTTTGTCTTGAATACTTCAGCATGGAATAATAGAGTAGGACTTTGGTTCTATTTTGTTGGTTTGTGAACCTTAGTAATGGTTAATAGGAACGGTTGGGGGCATTCGTATT
MagnaDeer33C	Netherlands	Capreolus capreolus		Babesia capreoli	no ambiguous nucleotides	AAATAACAATACAGGGCAATTGTCTTGTAATTGGAATGATGGTGACCTAAACCCTCACCAGAGTAACAATTGGAGGGCAAGTCTGGTGCCAGCAGCCGCGGTAATTCCAGCTCCAATAGCGTATATTAAACTTGTTGCAGTTAAAAAGCTCGTAGTTGAATTTTTGCGTGGTGTTAATATTGACTGATGTCGAGATTGCACTTCGCTTTTGGGATTTTTCCCTTTTTACTTTGAGAAAATTAGAGTGTTTCAAGCAGACTTTTGTCTTGAATACTTCAGCATGGAATAATAGAGTAGGACTTTGGTTCTATTTTGTTGGTTTGTGAACCTTAGTAATGGTTAATAGGAACGGTTGGGGGCATTCGTATT
MagnaDeer33D	Netherlands	Capreolus capreolus		Babesia capreoli	no ambiguous nucleotides	AAATAACAATACAGGGCAATTGTCTTGTAATTGGAATGATGGTGACCTAAACCCTCACCAGAGTAACAATTGGAGGGCAAGTCTGGTGCCAGCAGCCGCGGTAATTCCAGCTCCAATAGCGTATATTAAACTTGTTGCAGTTAAAAAGCTCGTAGTTGAATTTTTGCGTGGTGTTAATATTGACTGATGTCGAGATTGCACTTCGCTTTTGGGATTTTTCCCTTTTTACTTTGAGAAAATTAGAGTGTTTCAAGCAGACTTTTGTCTTGAATACTTCAGCATGGAATAATAGAGTAGGACTTTGGTTCTATTTTGTTGGTTTGTGAACCTTAGTAATGGTTAATAGGAACGGTTGGGGGCATTCGTATT
MagnaDeer37A	Netherlands	Capreolus capreolus		Babesia capreoli	no ambiguous nucleotides	AAATAACAATACAGGGCAATTGTCTTGTAATTGGAATGATGGTGACCTAAACCCTCACCAGAGTAACAATTGGAGGGCAAGTCTGGTGCCAGCAGCCGCGGTAATTCCAGCTCCAATAGCGTATATTAAACTTGTTGCAGTTAAAAAGCTCGTAGTTGAATTTTTGCGTGGTGTTAATATTGACTGATGTCGAGATTGCACTTCGCTTTTGGGATTTTTCCCTTTTTACTTTGAGAAAATTAGAGTGTTTCAAGCAGACTTTTGTCTTGAATACTTCAGCATGGAATAATAGAGTAGGACTTTGGTTCTATTTTGTTGGTTTGTGAACCTTAGTAATGGTTAATAGGAACGGTTGGGGGCATTCGTATT
MagnaDeer37B	Netherlands	Capreolus capreolus		Babesia capreoli	no ambiguous nucleotides	AAATAACAATACAGGGCAATTGTCTTGTAATTGGAATGATGGTGACCTAAACCCTCACCAGAGTAACAATTGGAGGGCAAGTCTGGTGCCAGCAGCCGCGGTAATTCCAGCTCCAATAGCGTATATTAAACTTGTTGCAGTTAAAAAGCTCGTAGTTGAATTTTTGCGTGGTGTTAATATTGACTGATGTCGAGATTGCACTTCGCTTTTGGGATTTTTCCCTTTTTACTTTGAGAAAATTAGAGTGTTTCAAGCAGACTTTTGTCTTGAATACTTCAGCATGGAATAATAGAGTAGGACTTTGGTTCTATTTTGTTGGTTTGTGAACCTTAGTAATGGTTAATAGGAACGGTTGGGGGCATTCGTATT
MagnaDeer37E	Netherlands	Capreolus capreolus		Babesia capreoli	no ambiguous nucleotides	AAATAACAATACAGGGCAATTGTCTTGTAATTGGAATGATGGTGACCTAAACCCTCACCAGAGTAACAATTGGAGGGCAAGTCTGGTGCCAGCAGCCGCGGTAATTCCAGCTCCAATAGCGTATATTAAACTTGTTGCAGTTAAAAAGCTCGTAGTTGAATTTTTGCGTGGTGTTAATATTGACTGATGTCGAGATTGCACTTCGCTTTTGGGATTTTTCCCTTTTTACTTTGAGAAAATTAGAGTGTTTCAAGCAGACTTTTGTCTTGAATACTTCAGCATGGAATAATAGAGTAGGACTTTGGTTCTATTTTGTTGGTTTGTGAACCTTAGTAATGGTTAATAGGAACGGTTGGGGGCATTCGTATT
MagnaDeer37G	Netherlands	Capreolus capreolus		Babesia capreoli	no ambiguous nucleotides	AAATAACAATACAGGGCAATTGTCTTGTAATTGGAATGATGGTGACCTAAACCCTCACCAGAGTAACAATTGGAGGGCAAGTCTGGTGCCAGCAGCCGCGGTAATTCCAGCTCCAATAGCGTATATTAAACTTGTTGCAGTTAAAAAGCTCGTAGTTGAATTTTTGCGTGGTGTTAATATTGACTGATGTCGAGATTGCACTTCGCTTTTGGGATTTTTCCCTTTTTACTTTGAGAAAATTAGAGTGTTTCAAGCAGACTTTTGTCTTGAATACTTCAGCATGGAATAATAGAGTAGGACTTTGGTTCTATTTTGTTGGTTTGTGAACCTTAGTAATGGTTAATAGGAACGGTTGGGGGCATTCGTATT
MagnaDeer37H	Netherlands	Capreolus capreolus		Babesia capreoli	no ambiguous nucleotides	AAATAACAATACAGGGCAATTGTCTTGTAATTGGAATGATGGTGACCTAAACCCTCACCAGAGTAACAATTGGAGGGCAAGTCTGGTGCCAGCAGCCGCGGTAATTCCAGCTCCAATAGCGTATATTAAACTTGTTGCAGTTAAAAAGCTCGTAGTTGAATTTTTGCGTGGTGTTAATATTGACTGATGTCGAGATTGCACTTCGCTTTTGGGATTTTTCCCTTTTTACTTTGAGAAAATTAGAGTGTTTCAAGCAGACTTTTGTCTTGAATACTTCAGCATGGAATAATAGAGTAGGACTTTGGTTCTATTTTGTTGGTTTGTGAACCTTAGTAATGGTTAATAGGAACGGTTGGGGGCATTCGTATT
MagnaDeer38A	Netherlands	Capreolus capreolus		Babesia capreoli	no ambiguous nucleotides	AAATAACAATACAGGGCAATTGTCTTGTAATTGGAATGATGGTGACCTAAACCCTCACCAGAGTAACAATTGGAGGGCAAGTCTGGTGCCAGCAGCCGCGGTAATTCCAGCTCCAATAGCGTATATTAAACTTGTTGCAGTTAAAAAGCTCGTAGTTGAATTTTTGCGTGGTGTTAATATTGACTGATGTCGAGATTGCACTTCGCTTTTGGGATTTTTCCCTTTTTACTTTGAGAAAATTAGAGTGTTTCAAGCAGACTTTTGTCTTGAATACTTCAGCATGGAATAATAGAGTAGGACTTTGGTTCTATTTTGTTGGTTTGTGAACCTTAGTAATGGTTAATAGGAACGGTTGGGGGCATTCGTATT
MagnaDeer38E	Netherlands	Capreolus capreolus		Babesia capreoli	no ambiguous nucleotides	AAATAACAATACAGGGCAATTGTCTTGTAATTGGAATGATGGTGACCTAAACCCTCACCAGAGTAACAATTGGAGGGCAAGTCTGGTGCCAGCAGCCGCGGTAATTCCAGCTCCAATAGCGTATATTAAACTTGTTGCAGTTAAAAAGCTCGTAGTTGAATTTTTGCGTGGTGTTAATATTGACTGATGTCGAGATTGCACTTCGCTTTTGGGATTTTTCCCTTTTTACTTTGAGAAAATTAGAGTGTTTCAAGCAGACTTTTGTCTTGAATACTTCAGCATGGAATAATAGAGTAGGACTTTGGTTCTATTTTGTTGGTTTGTGAACCTTAGTAATGGTTAATAGGAACGGTTGGGGGCATTCGTATT
MagnaDeer3A	Netherlands	Capreolus capreolus		Babesia capreoli	no ambiguous nucleotides	AAATAACAATACAGGGCAATTGTCTTGTAATTGGAATGATGGTGACCTAAACCCTCACCAGAGTAACAATTGGAGGGCAAGTCTGGTGCCAGCAGCCGCGGTAATTCCAGCTCCAATAGCGTATATTAAACTTGTTGCAGTTAAAAAGCTCGTAGTTGAATTTTTGCGTGGTGTTAATATTGACTGATGTCGAGATTGCACTTCGCTTTTGGGATTTTTCCCTTTTTACTTTGAGAAAATTAGAGTGTTTCAAGCAGACTTTTGTCTTGAATACTTCAGCATGGAATAATAGAGTAGGACTTTGGTTCTATTTTGTTGGTTTGTGAACCTTAGTAATGGTTAATAGGAACGGTTGGGGGCATTCGTATT
MagnaDeer3E	Netherlands	Capreolus capreolus		Babesia capreoli	no ambiguous nucleotides	AAATAACAATACAGGGCAATTGTCTTGTAATTGGAATGATGGTGACCTAAACCCTCACCAGAGTAACAATTGGAGGGCAAGTCTGGTGCCAGCAGCCGCGGTAATTCCAGCTCCAATAGCGTATATTAAACTTGTTGCAGTTAAAAAGCTCGTAGTTGAATTTTTGCGTGGTGTTAATATTGACTGATGTCGAGATTGCACTTCGCTTTTGGGATTTTTCCCTTTTTACTTTGAGAAAATTAGAGTGTTTCAAGCAGACTTTTGTCTTGAATACTTCAGCATGGAATAATAGAGTAGGACTTTGGTTCTATTTTGTTGGTTTGTGAACCTTAGTAATGGTTAATAGGAACGGTTGGGGGCATTCGTATT
MagnaDeer3G	Netherlands	Capreolus capreolus		Babesia capreoli	no ambiguous nucleotides	AAATAACAATACAGGGCAATTGTCTTGTAATTGGAATGATGGTGACCTAAACCCTCACCAGAGTAACAATTGGAGGGCAAGTCTGGTGCCAGCAGCCGCGGTAATTCCAGCTCCAATAGCGTATATTAAACTTGTTGCAGTTAAAAAGCTCGTAGTTGAATTTTTGCGTGGTGTTAATATTGACTGATGTCGAGATTGCACTTCGCTTTTGGGATTTTTCCCTTTTTACTTTGAGAAAATTAGAGTGTTTCAAGCAGACTTTTGTCTTGAATACTTCAGCATGGAATAATAGAGTAGGACTTTGGTTCTATTTTGTTGGTTTGTGAACCTTAGTAATGGTTAATAGGAACGGTTGGGGGCATTCGTATT
MagnaDeer41E	Netherlands	Capreolus capreolus		Babesia capreoli	no ambiguous nucleotides	AAATAACAATACAGGGCAATTGTCTTGTAATTGGAATGATGGTGACCTAAACCCTCACCAGAGTAACAATTGGAGGGCAAGTCTGGTGCCAGCAGCCGCGGTAATTCCAGCTCCAATAGCGTATATTAAACTTGTTGCAGTTAAAAAGCTCGTAGTTGAATTTTTGCGTGGTGTTAATATTGACTGATGTCGAGATTGCACTTCGCTTTTGGGATTTTTCCCTTTTTACTTTGAGAAAATTAGAGTGTTTCAAGCAGACTTTTGTCTTGAATACTTCAGCATGGAATAATAGAGTAGGACTTTGGTTCTATTTTGTTGGTTTGTGAACCTTAGTAATGGTTAATAGGAACGGTTGGGGGCATTCGTATT
MagnaDeer41G	Netherlands	Capreolus capreolus		Babesia capreoli	no ambiguous nucleotides	AAATAACAATACAGGGCAATTGTCTTGTAATTGGAATGATGGTGACCTAAACCCTCACCAGAGTAACAATTGGAGGGCAAGTCTGGTGCCAGCAGCCGCGGTAATTCCAGCTCCAATAGCGTATATTAAACTTGTTGCAGTTAAAAAGCTCGTAGTTGAATTTTTGCGTGGTGTTAATATTGACTGATGTCGAGATTGCACTTCGCTTTTGGGATTTTTCCCTTTTTACTTTGAGAAAATTAGAGTGTTTCAAGCAGACTTTTGTCTTGAATACTTCAGCATGGAATAATAGAGTAGGACTTTGGTTCTATTTTGTTGGTTTGTGAACCTTAGTAATGGTTAATAGGAACGGTTGGGGGCATTCGTATT
MagnaDeer41H	Netherlands	Capreolus capreolus		Babesia capreoli	no ambiguous nucleotides	AAATAACAATACAGGGCAATTGTCTTGTAATTGGAATGATGGTGACCTAAACCCTCACCAGAGTAACAATTGGAGGGCAAGTCTGGTGCCAGCAGCCGCGGTAATTCCAGCTCCAATAGCGTATATTAAACTTGTTGCAGTTAAAAAGCTCGTAGTTGAATTTTTGCGTGGTGTTAATATTGACTGATGTCGAGATTGCACTTCGCTTTTGGGATTTTTCCCTTTTTACTTTGAGAAAATTAGAGTGTTTCAAGCAGACTTTTGTCTTGAATACTTCAGCATGGAATAATAGAGTAGGACTTTGGTTCTATTTTGTTGGTTTGTGAACCTTAGTAATGGTTAATAGGAACGGTTGGGGGCATTCGTATT
MagnaDeer42B	Netherlands	Capreolus capreolus		Babesia capreoli	no ambiguous nucleotides	AAATAACAATACAGGGCAATTGTCTTGTAATTGGAATGATGGTGACCTAAACCCTCACCAGAGTAACAATTGGAGGGCAAGTCTGGTGCCAGCAGCCGCGGTAATTCCAGCTCCAATAGCGTATATTAAACTTGTTGCAGTTAAAAAGCTCGTAGTTGAATTTTTGCGTGGTGTTAATATTGACTGATGTCGAGATTGCACTTCGCTTTTGGGATTTTTCCCTTTTTACTTTGAGAAAATTAGAGTGTTTCAAGCAGACTTTTGTCTTGAATACTTCAGCATGGAATAATAGAGTAGGACTTTGGTTCTATTTTGTTGGTTTGTGAACCTTAGTAATGGTTAATAGGAACGGTTGGGGGCATTCGTATT
MagnaDeer42C	Netherlands	Capreolus capreolus		Babesia capreoli	no ambiguous nucleotides	AAATAACAATACAGGGCAATTGTCTTGTAATTGGAATGATGGTGACCTAAACCCTCACCAGAGTAACAATTGGAGGGCAAGTCTGGTGCCAGCAGCCGCGGTAATTCCAGCTCCAATAGCGTATATTAAACTTGTTGCAGTTAAAAAGCTCGTAGTTGAATTTTTGCGTGGTGTTAATATTGACTGATGTCGAGATTGCACTTCGCTTTTGGGATTTTTCCCTTTTTACTTTGAGAAAATTAGAGTGTTTCAAGCAGACTTTTGTCTTGAATACTTCAGCATGGAATAATAGAGTAGGACTTTGGTTCTATTTTGTTGGTTTGTGAACCTTAGTAATGGTTAATAGGAACGGTTGGGGGCATTCGTATT
MagnaDeer44B	Netherlands	Capreolus capreolus		Babesia capreoli		AAATAACAATACAGGGCAATTGTCTTGTAATTGGAATGATGGTGACCTAAACCCTCACCAGAGTAACAATTGGAGGGCAAGTCTGGTGCCAGCAGCCGCGGTAATTCCAGCTCCAATAGCGTATATTAAACTTGTTGCAGTTAAAAAGCTCGTAGTTGAATTTTTGCGTGGTGTTAATATTGACTGATGTCGAGATTGCACTTCGCTTTTGGGATTTTTCCCTTTTTACTTTGAGAAAATTAGAGTGTTTCAAGCAGACTTTTGTCTTGAATACTTCAGCATGGAATAATAGAGTAGGACTTTGGTTCTATTTTGTTGGTTTGTGAACCTTAGTAATGGTTAATAGGAACGGTTGGGGGCATTCGTATT
MagnaDeer45A	Netherlands	Capreolus capreolus		Babesia capreoli		AAATAACAATACAGGGCAATTGTCTTGTAATTGGAATGATGGTGACCTAAACCCTCACCAGAGTAACAATTGGAGGGCAAGTCTGGTGCCAGCAGCCGCGGTAATTCCAGCTCCAATAGCGTATATTAAACTTGTTGCAGTTAAAAAGCTCGTAGTTGAATTTTTGCGTGGTGTTAATATTGACTGATGTCGAGATTGCACTTCGCTTTTGGGATTTTTCCCTTTTTACTTTGAGAAAATTAGAGTGTTTCAAGCAGACTTTTGTCTTGAATACTTCAGCATGGAATAATAGAGTAGGACTTTGGTTCTATTTTGTTGGTTTGTGAACCTTAGTAATGGTTAATAGGAACGGTTGGGGGCATTCGTATT
MagnaDeer45C	Netherlands	Capreolus capreolus		Babesia capreoli		AAATAACAATACAGGGCAATTGTCTTGTAATTGGAATGATGGTGACCTAAACCCTCACCAGAGTAACAATTGGAGGGCAAGTCTGGTGCCAGCAGCCGCGGTAATTCCAGCTCCAATAGCGTATATTAAACTTGTTGCAGTTAAAAAGCTCGTAGTTGAATTTTTGCGTGGTGTTAATATTGACTGATGTCGAGATTGCACTTCGCTTTTGGGATTTTTCCCTTTTTACTTTGAGAAAATTAGAGTGTTTCAAGCAGACTTTTGTCTTGAATACTTCAGCATGGAATAATAGAGTAGGACTTTGGTTCTATTTTGTTGGTTTGTGAACCTTAGTAATGGTTAATAGGAACGGTTGGGGGCATTCGTATT
MagnaDeer45E	Netherlands	Capreolus capreolus		Babesia capreoli		AAATAACAATACAGGGCAATTGTCTTGTAATTGGAATGATGGTGACCTAAACCCTCACCAGAGTAACAATTGGAGGGCAAGTCTGGTGCCAGCAGCCGCGGTAATTCCAGCTCCAATAGCGTATATTAAACTTGTTGCAGTTAAAAAGCTCGTAGTTGAATTTTTGCGTGGTGTTAATATTGACTGATGTCGAGATTGCACTTCGCTTTTGGGATTTTTCCCTTTTTACTTTGAGAAAATTAGAGTGTTTCAAGCAGACTTTTGTCTTGAATACTTCAGCATGGAATAATAGAGTAGGACTTTGGTTCTATTTTGTTGGTTTGTGAACCTTAGTAATGGTTAATAGGAACGGTTGGGGGCATTCGTATT
MagnaDeer45F	Netherlands	Capreolus capreolus		Babesia capreoli		AAATAACAATACAGGGCAATTGTCTTGTAATTGGAATGATGGTGACCTAAACCCTCACCAGAGTAACAATTGGAGGGCAAGTCTGGTGCCAGCAGCCGCGGTAATTCCAGCTCCAATAGCGTATATTAAACTTGTTGCAGTTAAAAAGCTCGTAGTTGAATTTTTGCGTGGTGTTAATATTGACTGATGTCGAGATTGCACTTCGCTTTTGGGATTTTTCCCTTTTTACTTTGAGAAAATTAGAGTGTTTCAAGCAGACTTTTGTCTTGAATACTTCAGCATGGAATAATAGAGTAGGACTTTGGTTCTATTTTGTTGGTTTGTGAACCTTAGTAATGGTTAATAGGAACGGTTGGGGGCATTCGTATT
MagnaDeer45H	Netherlands	Capreolus capreolus		Babesia capreoli		AAATAACAATACAGGGCAATTGTCTTGTAATTGGAATGATGGTGACCTAAACCCTCACCAGAGTAACAATTGGAGGGCAAGTCTGGTGCCAGCAGCCGCGGTAATTCCAGCTCCAATAGCGTATATTAAACTTGTTGCAGTTAAAAAGCTCGTAGTTGAATTTTTGCGTGGTGTTAATATTGACTGATGTCGAGATTGCACTTCGCTTTTGGGATTTTTCCCTTTTTACTTTGAGAAAATTAGAGTGTTTCAAGCAGACTTTTGTCTTGAATACTTCAGCATGGAATAATAGAGTAGGACTTTGGTTCTATTTTGTTGGTTTGTGAACCTTAGTAATGGTTAATAGGAACGGTTGGGGGCATTCGTATT
MagnaDeer46D	Netherlands	Capreolus capreolus		Babesia capreoli		AAATAACAATACAGGGCAATTGTCTTGTAATTGGAATGATGGTGACCTAAACCCTCACCAGAGTAACAATTGGAGGGCAAGTCTGGTGCCAGCAGCCGCGGTAATTCCAGCTCCAATAGCGTATATTAAACTTGTTGCAGTTAAAAAGCTCGTAGTTGAATTTTTGCGTGGTGTTAATATTGACTGATGTCGAGATTGCACTTCGCTTTTGGGATTTTTCCCTTTTTACTTTGAGAAAATTAGAGTGTTTCAAGCAGACTTTTGTCTTGAATACTTCAGCATGGAATAATAGAGTAGGACTTTGGTTCTATTTTGTTGGTTTGTGAACCTTAGTAATGGTTAATAGGAACGGTTGGGGGCATTCGTATT
MagnaDeer46G	Netherlands	Capreolus capreolus		Babesia capreoli	no ambiguous nucleotides	AAATAACAATACAGGGCAATTGTCTTGTAATTGGAATGATGGTGACCTAAACCCTCACCAGAGTAACAATTGGAGGGCAAGTCTGGTGCCAGCAGCCGCGGTAATTCCAGCTCCAATAGCGTATATTAAACTTGTTGCAGTTAAAAAGCTCGTAGTTGAATTTTTGCGTGGTGTTAATATTGACTGATGTCGAGATTGCACTTCGCTTTTGGGATTTTTCCCTTTTTACTTTGAGAAAATTAGAGTGTTTCAAGCAGACTTTTGTCTTGAATACTTCAGCATGGAATAATAGAGTAGGACTTTGGTTCTATTTTGTTGGTTTGTGAACCTTAGTAATGGTTAATAGGAACGGTTGGGGGCATTCGTATT
MagnaDeer46H	Netherlands	Capreolus capreolus		Babesia capreoli	no ambiguous nucleotides	AAATAACAATACAGGGCAATTGTCTTGTAATTGGAATGATGGTGACCTAAACCCTCACCAGAGTAACAATTGGAGGGCAAGTCTGGTGCCAGCAGCCGCGGTAATTCCAGCTCCAATAGCGTATATTAAACTTGTTGCAGTTAAAAAGCTCGTAGTTGAATTTTTGCGTGGTGTTAATATTGACTGATGTCGAGATTGCACTTCGCTTTTGGGATTTTTCCCTTTTTACTTTGAGAAAATTAGAGTGTTTCAAGCAGACTTTTGTCTTGAATACTTCAGCATGGAATAATAGAGTAGGACTTTGGTTCTATTTTGTTGGTTTGTGAACCTTAGTAATGGTTAATAGGAACGGTTGGGGGCATTCGTATT
MagnaDeer47B	Netherlands	Capreolus capreolus		Babesia capreoli	no ambiguous nucleotides	AAATAACAATACAGGGCAATTGTCTTGTAATTGGAATGATGGTGACCTAAACCCTCACCAGAGTAACAATTGGAGGGCAAGTCTGGTGCCAGCAGCCGCGGTAATTCCAGCTCCAATAGCGTATATTAAACTTGTTGCAGTTAAAAAGCTCGTAGTTGAATTTTTGCGTGGTGTTAATATTGACTGATGTCGAGATTGCACTTCGCTTTTGGGATTTTTCCCTTTTTACTTTGAGAAAATTAGAGTGTTTCAAGCAGACTTTTGTCTTGAATACTTCAGCATGGAATAATAGAGTAGGACTTTGGTTCTATTTTGTTGGTTTGTGAACCTTAGTAATGGTTAATAGGAACGGTTGGGGGCATTCGTATT
MagnaDeer47D	Netherlands	Capreolus capreolus		Babesia capreoli	no ambiguous nucleotides	AAATAACAATACAGGGCAATTGTCTTGTAATTGGAATGATGGTGACCTAAACCCTCACCAGAGTAACAATTGGAGGGCAAGTCTGGTGCCAGCAGCCGCGGTAATTCCAGCTCCAATAGCGTATATTAAACTTGTTGCAGTTAAAAAGCTCGTAGTTGAATTTTTGCGTGGTGTTAATATTGACTGATGTCGAGATTGCACTTCGCTTTTGGGATTTTTCCCTTTTTACTTTGAGAAAATTAGAGTGTTTCAAGCAGACTTTTGTCTTGAATACTTCAGCATGGAATAATAGAGTAGGACTTTGGTTCTATTTTGTTGGTTTGTGAACCTTAGTAATGGTTAATAGGAACGGTTGGGGGCATTCGTATT
MagnaDeer47E	Netherlands	Capreolus capreolus		Babesia capreoli	no ambiguous nucleotides	AAATAACAATACAGGGCAATTGTCTTGTAATTGGAATGATGGTGACCTAAACCCTCACCAGAGTAACAATTGGAGGGCAAGTCTGGTGCCAGCAGCCGCGGTAATTCCAGCTCCAATAGCGTATATTAAACTTGTTGCAGTTAAAAAGCTCGTAGTTGAATTTTTGCGTGGTGTTAATATTGACTGATGTCGAGATTGCACTTCGCTTTTGGGATTTTTCCCTTTTTACTTTGAGAAAATTAGAGTGTTTCAAGCAGACTTTTGTCTTGAATACTTCAGCATGGAATAATAGAGTAGGACTTTGGTTCTATTTTGTTGGTTTGTGAACCTTAGTAATGGTTAATAGGAACGGTTGGGGGCATTCGTATT
MagnaDeer48C	Netherlands	Capreolus capreolus		Babesia capreoli	no ambiguous nucleotides	AAATAACAATACAGGGCAATTGTCTTGTAATTGGAATGATGGTGACCTAAACCCTCACCAGAGTAACAATTGGAGGGCAAGTCTGGTGCCAGCAGCCGCGGTAATTCCAGCTCCAATAGCGTATATTAAACTTGTTGCAGTTAAAAAGCTCGTAGTTGAATTTTTGCGTGGTGTTAATATTGACTGATGTCGAGATTGCACTTCGCTTTTGGGATTTTTCCCTTTTTACTTTGAGAAAATTAGAGTGTTTCAAGCAGACTTTTGTCTTGAATACTTCAGCATGGAATAATAGAGTAGGACTTTGGTTCTATTTTGTTGGTTTGTGAACCTTAGTAATGGTTAATAGGAACGGTTGGGGGCATTCGTATT
MagnaDeer48F	Netherlands	Capreolus capreolus		Babesia capreoli	no ambiguous nucleotides	AAATAACAATACAGGGCAATTGTCTTGTAATTGGAATGATGGTGACCTAAACCCTCACCAGAGTAACAATTGGAGGGCAAGTCTGGTGCCAGCAGCCGCGGTAATTCCAGCTCCAATAGCGTATATTAAACTTGTTGCAGTTAAAAAGCTCGTAGTTGAATTTTTGCGTGGTGTTAATATTGACTGATGTCGAGATTGCACTTCGCTTTTGGGATTTTTCCCTTTTTACTTTGAGAAAATTAGAGTGTTTCAAGCAGACTTTTGTCTTGAATACTTCAGCATGGAATAATAGAGTAGGACTTTGGTTCTATTTTGTTGGTTTGTGAACCTTAGTAATGGTTAATAGGAACGGTTGGGGGCATTCGTATT
MagnaDeer49B	Netherlands	Capreolus capreolus		Babesia capreoli	no ambiguous nucleotides	AAATAACAATACAGGGCAATTGTCTTGTAATTGGAATGATGGTGACCTAAACCCTCACCAGAGTAACAATTGGAGGGCAAGTCTGGTGCCAGCAGCCGCGGTAATTCCAGCTCCAATAGCGTATATTAAACTTGTTGCAGTTAAAAAGCTCGTAGTTGAATTTTTGCGTGGTGTTAATATTGACTGATGTCGAGATTGCACTTCGCTTTTGGGATTTTTCCCTTTTTACTTTGAGAAAATTAGAGTGTTTCAAGCAGACTTTTGTCTTGAATACTTCAGCATGGAATAATAGAGTAGGACTTTGGTTCTATTTTGTTGGTTTGTGAACCTTAGTAATGGTTAATAGGAACGGTTGGGGGCATTCGTATT
MagnaDeer49E	Netherlands	Capreolus capreolus		Babesia capreoli	no ambiguous nucleotides	AAATAACAATACAGGGCAATTGTCTTGTAATTGGAATGATGGTGACCTAAACCCTCACCAGAGTAACAATTGGAGGGCAAGTCTGGTGCCAGCAGCCGCGGTAATTCCAGCTCCAATAGCGTATATTAAACTTGTTGCAGTTAAAAAGCTCGTAGTTGAATTTTTGCGTGGTGTTAATATTGACTGATGTCGAGATTGCACTTCGCTTTTGGGATTTTTCCCTTTTTACTTTGAGAAAATTAGAGTGTTTCAAGCAGACTTTTGTCTTGAATACTTCAGCATGGAATAATAGAGTAGGACTTTGGTTCTATTTTGTTGGTTTGTGAACCTTAGTAATGGTTAATAGGAACGGTTGGGGGCATTCGTATT
MagnaDeer4B	Netherlands	Capreolus capreolus		Babesia capreoli	no ambiguous nucleotides	AAATAACAATACAGGGCAATTGTCTTGTAATTGGAATGATGGTGACCTAAACCCTCACCAGAGTAACAATTGGAGGGCAAGTCTGGTGCCAGCAGCCGCGGTAATTCCAGCTCCAATAGCGTATATTAAACTTGTTGCAGTTAAAAAGCTCGTAGTTGAATTTTTGCGTGGTGTTAATATTGACTGATGTCGAGATTGCACTTCGCTTTTGGGATTTTTCCCTTTTTACTTTGAGAAAATTAGAGTGTTTCAAGCAGACTTTTGTCTTGAATACTTCAGCATGGAATAATAGAGTAGGACTTTGGTTCTATTTTGTTGGTTTGTGAACCTTAGTAATGGTTAATAGGAACGGTTGGGGGCATTCGTATT
MagnaDeer4C	Netherlands	Capreolus capreolus		Babesia capreoli	no ambiguous nucleotides	AAATAACAATACAGGGCAATTGTCTTGTAATTGGAATGATGGTGACCTAAACCCTCACCAGAGTAACAATTGGAGGGCAAGTCTGGTGCCAGCAGCCGCGGTAATTCCAGCTCCAATAGCGTATATTAAACTTGTTGCAGTTAAAAAGCTCGTAGTTGAATTTTTGCGTGGTGTTAATATTGACTGATGTCGAGATTGCACTTCGCTTTTGGGATTTTTCCCTTTTTACTTTGAGAAAATTAGAGTGTTTCAAGCAGACTTTTGTCTTGAATACTTCAGCATGGAATAATAGAGTAGGACTTTGGTTCTATTTTGTTGGTTTGTGAACCTTAGTAATGGTTAATAGGAACGGTTGGGGGCATTCGTATT
MagnaDeer4G	Netherlands	Capreolus capreolus		Babesia capreoli	no ambiguous nucleotides	AAATAACAATACAGGGCAATTGTCTTGTAATTGGAATGATGGTGACCTAAACCCTCACCAGAGTAACAATTGGAGGGCAAGTCTGGTGCCAGCAGCCGCGGTAATTCCAGCTCCAATAGCGTATATTAAACTTGTTGCAGTTAAAAAGCTCGTAGTTGAATTTTTGCGTGGTGTTAATATTGACTGATGTCGAGATTGCACTTCGCTTTTGGGATTTTTCCCTTTTTACTTTGAGAAAATTAGAGTGTTTCAAGCAGACTTTTGTCTTGAATACTTCAGCATGGAATAATAGAGTAGGACTTTGGTTCTATTTTGTTGGTTTGTGAACCTTAGTAATGGTTAATAGGAACGGTTGGGGGCATTCGTATT
MagnaDeer50B	Netherlands	Capreolus capreolus		Babesia capreoli	no ambiguous nucleotides	AAATAACAATACAGGGCAATTGTCTTGTAATTGGAATGATGGTGACCTAAACCCTCACCAGAGTAACAATTGGAGGGCAAGTCTGGTGCCAGCAGCCGCGGTAATTCCAGCTCCAATAGCGTATATTAAACTTGTTGCAGTTAAAAAGCTCGTAGTTGAATTTTTGCGTGGTGTTAATATTGACTGATGTCGAGATTGCACTTCGCTTTTGGGATTTTTCCCTTTTTACTTTGAGAAAATTAGAGTGTTTCAAGCAGACTTTTGTCTTGAATACTTCAGCATGGAATAATAGAGTAGGACTTTGGTTCTATTTTGTTGGTTTGTGAACCTTAGTAATGGTTAATAGGAACGGTTGGGGGCATTCGTATT
MagnaDeer50D	Netherlands	Capreolus capreolus		Babesia capreoli	no ambiguous nucleotides	AAATAACAATACAGGGCAATTGTCTTGTAATTGGAATGATGGTGACCTAAACCCTCACCAGAGTAACAATTGGAGGGCAAGTCTGGTGCCAGCAGCCGCGGTAATTCCAGCTCCAATAGCGTATATTAAACTTGTTGCAGTTAAAAAGCTCGTAGTTGAATTTTTGCGTGGTGTTAATATTGACTGATGTCGAGATTGCACTTCGCTTTTGGGATTTTTCCCTTTTTACTTTGAGAAAATTAGAGTGTTTCAAGCAGACTTTTGTCTTGAATACTTCAGCATGGAATAATAGAGTAGGACTTTGGTTCTATTTTGTTGGTTTGTGAACCTTAGTAATGGTTAATAGGAACGGTTGGGGGCATTCGTATT
MagnaDeer50G	Netherlands	Capreolus capreolus		Babesia capreoli	no ambiguous nucleotides	AAATAACAATACAGGGCAATTGTCTTGTAATTGGAATGATGGTGACCTAAACCCTCACCAGAGTAACAATTGGAGGGCAAGTCTGGTGCCAGCAGCCGCGGTAATTCCAGCTCCAATAGCGTATATTAAACTTGTTGCAGTTAAAAAGCTCGTAGTTGAATTTTTGCGTGGTGTTAATATTGACTGATGTCGAGATTGCACTTCGCTTTTGGGATTTTTCCCTTTTTACTTTGAGAAAATTAGAGTGTTTCAAGCAGACTTTTGTCTTGAATACTTCAGCATGGAATAATAGAGTAGGACTTTGGTTCTATTTTGTTGGTTTGTGAACCTTAGTAATGGTTAATAGGAACGGTTGGGGGCATTCGTATT
MagnaDeer50H	Netherlands	Capreolus capreolus		Babesia capreoli	no ambiguous nucleotides	AAATAACAATACAGGGCAATTGTCTTGTAATTGGAATGATGGTGACCTAAACCCTCACCAGAGTAACAATTGGAGGGCAAGTCTGGTGCCAGCAGCCGCGGTAATTCCAGCTCCAATAGCGTATATTAAACTTGTTGCAGTTAAAAAGCTCGTAGTTGAATTTTTGCGTGGTGTTAATATTGACTGATGTCGAGATTGCACTTCGCTTTTGGGATTTTTCCCTTTTTACTTTGAGAAAATTAGAGTGTTTCAAGCAGACTTTTGTCTTGAATACTTCAGCATGGAATAATAGAGTAGGACTTTGGTTCTATTTTGTTGGTTTGTGAACCTTAGTAATGGTTAATAGGAACGGTTGGGGGCATTCGTATT
MagnaDeer51B	Netherlands	Capreolus capreolus		Babesia capreoli	no ambiguous nucleotides	AAATAACAATACAGGGCAATTGTCTTGTAATTGGAATGATGGTGACCTAAACCCTCACCAGAGTAACAATTGGAGGGCAAGTCTGGTGCCAGCAGCCGCGGTAATTCCAGCTCCAATAGCGTATATTAAACTTGTTGCAGTTAAAAAGCTCGTAGTTGAATTTTTGCGTGGTGTTAATATTGACTGATGTCGAGATTGCACTTCGCTTTTGGGATTTTTCCCTTTTTACTTTGAGAAAATTAGAGTGTTTCAAGCAGACTTTTGTCTTGAATACTTCAGCATGGAATAATAGAGTAGGACTTTGGTTCTATTTTGTTGGTTTGTGAACCTTAGTAATGGTTAATAGGAACGGTTGGGGGCATTCGTATT
MagnaDeer51C	Netherlands	Capreolus capreolus		Babesia capreoli	no ambiguous nucleotides	AAATAACAATACAGGGCAATTGTCTTGTAATTGGAATGATGGTGACCTAAACCCTCACCAGAGTAACAATTGGAGGGCAAGTCTGGTGCCAGCAGCCGCGGTAATTCCAGCTCCAATAGCGTATATTAAACTTGTTGCAGTTAAAAAGCTCGTAGTTGAATTTTTGCGTGGTGTTAATATTGACTGATGTCGAGATTGCACTTCGCTTTTGGGATTTTTCCCTTTTTACTTTGAGAAAATTAGAGTGTTTCAAGCAGACTTTTGTCTTGAATACTTCAGCATGGAATAATAGAGTAGGACTTTGGTTCTATTTTGTTGGTTTGTGAACCTTAGTAATGGTTAATAGGAACGGTTGGGGGCATTCGTATT
MagnaDeer51D	Netherlands	Capreolus capreolus		Babesia capreoli	no ambiguous nucleotides	AAATAACAATACAGGGCAATTGTCTTGTAATTGGAATGATGGTGACCTAAACCCTCACCAGAGTAACAATTGGAGGGCAAGTCTGGTGCCAGCAGCCGCGGTAATTCCAGCTCCAATAGCGTATATTAAACTTGTTGCAGTTAAAAAGCTCGTAGTTGAATTTTTGCGTGGTGTTAATATTGACTGATGTCGAGATTGCACTTCGCTTTTGGGATTTTTCCCTTTTTACTTTGAGAAAATTAGAGTGTTTCAAGCAGACTTTTGTCTTGAATACTTCAGCATGGAATAATAGAGTAGGACTTTGGTTCTATTTTGTTGGTTTGTGAACCTTAGTAATGGTTAATAGGAACGGTTGGGGGCATTCGTATT
MagnaDeer51E	Netherlands	Capreolus capreolus		Babesia capreoli	no ambiguous nucleotides	AAATAACAATACAGGGCAATTGTCTTGTAATTGGAATGATGGTGACCTAAACCCTCACCAGAGTAACAATTGGAGGGCAAGTCTGGTGCCAGCAGCCGCGGTAATTCCAGCTCCAATAGCGTATATTAAACTTGTTGCAGTTAAAAAGCTCGTAGTTGAATTTTTGCGTGGTGTTAATATTGACTGATGTCGAGATTGCACTTCGCTTTTGGGATTTTTCCCTTTTTACTTTGAGAAAATTAGAGTGTTTCAAGCAGACTTTTGTCTTGAATACTTCAGCATGGAATAATAGAGTAGGACTTTGGTTCTATTTTGTTGGTTTGTGAACCTTAGTAATGGTTAATAGGAACGGTTGGGGGCATTCGTATT
MagnaDeer51H	Netherlands	Capreolus capreolus		Babesia capreoli	no ambiguous nucleotides	AAATAACAATACAGGGCAATTGTCTTGTAATTGGAATGATGGTGACCTAAACCCTCACCAGAGTAACAATTGGAGGGCAAGTCTGGTGCCAGCAGCCGCGGTAATTCCAGCTCCAATAGCGTATATTAAACTTGTTGCAGTTAAAAAGCTCGTAGTTGAATTTTTGCGTGGTGTTAATATTGACTGATGTCGAGATTGCACTTCGCTTTTGGGATTTTTCCCTTTTTACTTTGAGAAAATTAGAGTGTTTCAAGCAGACTTTTGTCTTGAATACTTCAGCATGGAATAATAGAGTAGGACTTTGGTTCTATTTTGTTGGTTTGTGAACCTTAGTAATGGTTAATAGGAACGGTTGGGGGCATTCGTATT
MagnaDeer52B	Netherlands	Capreolus capreolus		Babesia capreoli	no ambiguous nucleotides	AAATAACAATACAGGGCAATTGTCTTGTAATTGGAATGATGGTGACCTAAACCCTCACCAGAGTAACAATTGGAGGGCAAGTCTGGTGCCAGCAGCCGCGGTAATTCCAGCTCCAATAGCGTATATTAAACTTGTTGCAGTTAAAAAGCTCGTAGTTGAATTTTTGCGTGGTGTTAATATTGACTGATGTCGAGATTGCACTTCGCTTTTGGGATTTTTCCCTTTTTACTTTGAGAAAATTAGAGTGTTTCAAGCAGACTTTTGTCTTGAATACTTCAGCATGGAATAATAGAGTAGGACTTTGGTTCTATTTTGTTGGTTTGTGAACCTTAGTAATGGTTAATAGGAACGGTTGGGGGCATTCGTATT
MagnaDeer52D	Netherlands	Capreolus capreolus		Babesia capreoli	no ambiguous nucleotides	AAATAACAATACAGGGCAATTGTCTTGTAATTGGAATGATGGTGACCTAAACCCTCACCAGAGTAACAATTGGAGGGCAAGTCTGGTGCCAGCAGCCGCGGTAATTCCAGCTCCAATAGCGTATATTAAACTTGTTGCAGTTAAAAAGCTCGTAGTTGAATTTTTGCGTGGTGTTAATATTGACTGATGTCGAGATTGCACTTCGCTTTTGGGATTTTTCCCTTTTTACTTTGAGAAAATTAGAGTGTTTCAAGCAGACTTTTGTCTTGAATACTTCAGCATGGAATAATAGAGTAGGACTTTGGTTCTATTTTGTTGGTTTGTGAACCTTAGTAATGGTTAATAGGAACGGTTGGGGGCATTCGTATT
MagnaDeer52G	Netherlands	Capreolus capreolus		Babesia capreoli	no ambiguous nucleotides	AAATAACAATACAGGGCAATTGTCTTGTAATTGGAATGATGGTGACCTAAACCCTCACCAGAGTAACAATTGGAGGGCAAGTCTGGTGCCAGCAGCCGCGGTAATTCCAGCTCCAATAGCGTATATTAAACTTGTTGCAGTTAAAAAGCTCGTAGTTGAATTTTTGCGTGGTGTTAATATTGACTGATGTCGAGATTGCACTTCGCTTTTGGGATTTTTCCCTTTTTACTTTGAGAAAATTAGAGTGTTTCAAGCAGACTTTTGTCTTGAATACTTCAGCATGGAATAATAGAGTAGGACTTTGGTTCTATTTTGTTGGTTTGTGAACCTTAGTAATGGTTAATAGGAACGGTTGGGGGCATTCGTATT
MagnaDeer53B	Netherlands	Capreolus capreolus		Babesia capreoli	no ambiguous nucleotides	AAATAACAATACAGGGCAATTGTCTTGTAATTGGAATGATGGTGACCTAAACCCTCACCAGAGTAACAATTGGAGGGCAAGTCTGGTGCCAGCAGCCGCGGTAATTCCAGCTCCAATAGCGTATATTAAACTTGTTGCAGTTAAAAAGCTCGTAGTTGAATTTTTGCGTGGTGTTAATATTGACTGATGTCGAGATTGCACTTCGCTTTTGGGATTTTTCCCTTTTTACTTTGAGAAAATTAGAGTGTTTCAAGCAGACTTTTGTCTTGAATACTTCAGCATGGAATAATAGAGTAGGACTTTGGTTCTATTTTGTTGGTTTGTGAACCTTAGTAATGGTTAATAGGAACGGTTGGGGGCATTCGTATT
MagnaDeer53C	Netherlands	Capreolus capreolus		Babesia capreoli	no ambiguous nucleotides	AAATAACAATACAGGGCAATTGTCTTGTAATTGGAATGATGGTGACCTAAACCCTCACCAGAGTAACAATTGGAGGGCAAGTCTGGTGCCAGCAGCCGCGGTAATTCCAGCTCCAATAGCGTATATTAAACTTGTTGCAGTTAAAAAGCTCGTAGTTGAATTTTTGCGTGGTGTTAATATTGACTGATGTCGAGATTGCACTTCGCTTTTGGGATTTTTCCCTTTTTACTTTGAGAAAATTAGAGTGTTTCAAGCAGACTTTTGTCTTGAATACTTCAGCATGGAATAATAGAGTAGGACTTTGGTTCTATTTTGTTGGTTTGTGAACCTTAGTAATGGTTAATAGGAACGGTTGGGGGCATTCGTATT
MagnaDeer53E	Netherlands	Capreolus capreolus		Babesia capreoli	no ambiguous nucleotides	AAATAACAATACAGGGCAATTGTCTTGTAATTGGAATGATGGTGACCTAAACCCTCACCAGAGTAACAATTGGAGGGCAAGTCTGGTGCCAGCAGCCGCGGTAATTCCAGCTCCAATAGCGTATATTAAACTTGTTGCAGTTAAAAAGCTCGTAGTTGAATTTTTGCGTGGTGTTAATATTGACTGATGTCGAGATTGCACTTCGCTTTTGGGATTTTTCCCTTTTTACTTTGAGAAAATTAGAGTGTTTCAAGCAGACTTTTGTCTTGAATACTTCAGCATGGAATAATAGAGTAGGACTTTGGTTCTATTTTGTTGGTTTGTGAACCTTAGTAATGGTTAATAGGAACGGTTGGGGGCATTCGTATT
MagnaDeer53F	Netherlands	Capreolus capreolus		Babesia capreoli	no ambiguous nucleotides	AAATAACAATACAGGGCAATTGTCTTGTAATTGGAATGATGGTGACCTAAACCCTCACCAGAGTAACAATTGGAGGGCAAGTCTGGTGCCAGCAGCCGCGGTAATTCCAGCTCCAATAGCGTATATTAAACTTGTTGCAGTTAAAAAGCTCGTAGTTGAATTTTTGCGTGGTGTTAATATTGACTGATGTCGAGATTGCACTTCGCTTTTGGGATTTTTCCCTTTTTACTTTGAGAAAATTAGAGTGTTTCAAGCAGACTTTTGTCTTGAATACTTCAGCATGGAATAATAGAGTAGGACTTTGGTTCTATTTTGTTGGTTTGTGAACCTTAGTAATGGTTAATAGGAACGGTTGGGGGCATTCGTATT
MagnaDeer58A	Netherlands	Capreolus capreolus		Babesia capreoli	no ambiguous nucleotides	AAATAACAATACAGGGCAATTGTCTTGTAATTGGAATGATGGTGACCTAAACCCTCACCAGAGTAACAATTGGAGGGCAAGTCTGGTGCCAGCAGCCGCGGTAATTCCAGCTCCAATAGCGTATATTAAACTTGTTGCAGTTAAAAAGCTCGTAGTTGAATTTTTGCGTGGTGTTAATATTGACTGATGTCGAGATTGCACTTCGCTTTTGGGATTTTTCCCTTTTTACTTTGAGAAAATTAGAGTGTTTCAAGCAGACTTTTGTCTTGAATACTTCAGCATGGAATAATAGAGTAGGACTTTGGTTCTATTTTGTTGGTTTGTGAACCTTAGTAATGGTTAATAGGAACGGTTGGGGGCATTCGTATT
MagnaDeer58B	Netherlands	Capreolus capreolus		Babesia capreoli	no ambiguous nucleotides	AAATAACAATACAGGGCAATTGTCTTGTAATTGGAATGATGGTGACCTAAACCCTCACCAGAGTAACAATTGGAGGGCAAGTCTGGTGCCAGCAGCCGCGGTAATTCCAGCTCCAATAGCGTATATTAAACTTGTTGCAGTTAAAAAGCTCGTAGTTGAATTTTTGCGTGGTGTTAATATTGACTGATGTCGAGATTGCACTTCGCTTTTGGGATTTTTCCCTTTTTACTTTGAGAAAATTAGAGTGTTTCAAGCAGACTTTTGTCTTGAATACTTCAGCATGGAATAATAGAGTAGGACTTTGGTTCTATTTTGTTGGTTTGTGAACCTTAGTAATGGTTAATAGGAACGGTTGGGGGCATTCGTATT
MagnaDeer58C	Netherlands	Capreolus capreolus		Babesia capreoli	no ambiguous nucleotides	AAATAACAATACAGGGCAATTGTCTTGTAATTGGAATGATGGTGACCTAAACCCTCACCAGAGTAACAATTGGAGGGCAAGTCTGGTGCCAGCAGCCGCGGTAATTCCAGCTCCAATAGCGTATATTAAACTTGTTGCAGTTAAAAAGCTCGTAGTTGAATTTTTGCGTGGTGTTAATATTGACTGATGTCGAGATTGCACTTCGCTTTTGGGATTTTTCCCTTTTTACTTTGAGAAAATTAGAGTGTTTCAAGCAGACTTTTGTCTTGAATACTTCAGCATGGAATAATAGAGTAGGACTTTGGTTCTATTTTGTTGGTTTGTGAACCTTAGTAATGGTTAATAGGAACGGTTGGGGGCATTCGTATT
MagnaDeer58E	Netherlands	Capreolus capreolus		Babesia capreoli	no ambiguous nucleotides	AAATAACAATACAGGGCAATTGTCTTGTAATTGGAATGATGGTGACCTAAACCCTCACCAGAGTAACAATTGGAGGGCAAGTCTGGTGCCAGCAGCCGCGGTAATTCCAGCTCCAATAGCGTATATTAAACTTGTTGCAGTTAAAAAGCTCGTAGTTGAATTTTTGCGTGGTGTTAATATTGACTGATGTCGAGATTGCACTTCGCTTTTGGGATTTTTCCCTTTTTACTTTGAGAAAATTAGAGTGTTTCAAGCAGACTTTTGTCTTGAATACTTCAGCATGGAATAATAGAGTAGGACTTTGGTTCTATTTTGTTGGTTTGTGAACCTTAGTAATGGTTAATAGGAACGGTTGGGGGCATTCGTATT
MagnaDeer58F	Netherlands	Capreolus capreolus		Babesia capreoli	no ambiguous nucleotides	AAATAACAATACAGGGCAATTGTCTTGTAATTGGAATGATGGTGACCTAAACCCTCACCAGAGTAACAATTGGAGGGCAAGTCTGGTGCCAGCAGCCGCGGTAATTCCAGCTCCAATAGCGTATATTAAACTTGTTGCAGTTAAAAAGCTCGTAGTTGAATTTTTGCGTGGTGTTAATATTGACTGATGTCGAGATTGCACTTCGCTTTTGGGATTTTTCCCTTTTTACTTTGAGAAAATTAGAGTGTTTCAAGCAGACTTTTGTCTTGAATACTTCAGCATGGAATAATAGAGTAGGACTTTGGTTCTATTTTGTTGGTTTGTGAACCTTAGTAATGGTTAATAGGAACGGTTGGGGGCATTCGTATT
MagnaDeer58G	Netherlands	Capreolus capreolus		Babesia capreoli	no ambiguous nucleotides	AAATAACAATACAGGGCAATTGTCTTGTAATTGGAATGATGGTGACCTAAACCCTCACCAGAGTAACAATTGGAGGGCAAGTCTGGTGCCAGCAGCCGCGGTAATTCCAGCTCCAATAGCGTATATTAAACTTGTTGCAGTTAAAAAGCTCGTAGTTGAATTTTTGCGTGGTGTTAATATTGACTGATGTCGAGATTGCACTTCGCTTTTGGGATTTTTCCCTTTTTACTTTGAGAAAATTAGAGTGTTTCAAGCAGACTTTTGTCTTGAATACTTCAGCATGGAATAATAGAGTAGGACTTTGGTTCTATTTTGTTGGTTTGTGAACCTTAGTAATGGTTAATAGGAACGGTTGGGGGCATTCGTATT
MagnaDeer59B	Netherlands	Capreolus capreolus		Babesia capreoli	no ambiguous nucleotides	AAATAACAATACAGGGCAATTGTCTTGTAATTGGAATGATGGTGACCTAAACCCTCACCAGAGTAACAATTGGAGGGCAAGTCTGGTGCCAGCAGCCGCGGTAATTCCAGCTCCAATAGCGTATATTAAACTTGTTGCAGTTAAAAAGCTCGTAGTTGAATTTTTGCGTGGTGTTAATATTGACTGATGTCGAGATTGCACTTCGCTTTTGGGATTTTTCCCTTTTTACTTTGAGAAAATTAGAGTGTTTCAAGCAGACTTTTGTCTTGAATACTTCAGCATGGAATAATAGAGTAGGACTTTGGTTCTATTTTGTTGGTTTGTGAACCTTAGTAATGGTTAATAGGAACGGTTGGGGGCATTCGTATT
MagnaDeer59E	Netherlands	Capreolus capreolus		Babesia capreoli	no ambiguous nucleotides	AAATAACAATACAGGGCAATTGTCTTGTAATTGGAATGATGGTGACCTAAACCCTCACCAGAGTAACAATTGGAGGGCAAGTCTGGTGCCAGCAGCCGCGGTAATTCCAGCTCCAATAGCGTATATTAAACTTGTTGCAGTTAAAAAGCTCGTAGTTGAATTTTTGCGTGGTGTTAATATTGACTGATGTCGAGATTGCACTTCGCTTTTGGGATTTTTCCCTTTTTACTTTGAGAAAATTAGAGTGTTTCAAGCAGACTTTTGTCTTGAATACTTCAGCATGGAATAATAGAGTAGGACTTTGGTTCTATTTTGTTGGTTTGTGAACCTTAGTAATGGTTAATAGGAACGGTTGGGGGCATTCGTATT
MagnaDeer59F	Netherlands	Capreolus capreolus		Babesia capreoli	no ambiguous nucleotides	AAATAACAATACAGGGCAATTGTCTTGTAATTGGAATGATGGTGACCTAAACCCTCACCAGAGTAACAATTGGAGGGCAAGTCTGGTGCCAGCAGCCGCGGTAATTCCAGCTCCAATAGCGTATATTAAACTTGTTGCAGTTAAAAAGCTCGTAGTTGAATTTTTGCGTGGTGTTAATATTGACTGATGTCGAGATTGCACTTCGCTTTTGGGATTTTTCCCTTTTTACTTTGAGAAAATTAGAGTGTTTCAAGCAGACTTTTGTCTTGAATACTTCAGCATGGAATAATAGAGTAGGACTTTGGTTCTATTTTGTTGGTTTGTGAACCTTAGTAATGGTTAATAGGAACGGTTGGGGGCATTCGTATT
MagnaDeer59H	Netherlands	Capreolus capreolus		Babesia capreoli	no ambiguous nucleotides	AAATAACAATACAGGGCAATTGTCTTGTAATTGGAATGATGGTGACCTAAACCCTCACCAGAGTAACAATTGGAGGGCAAGTCTGGTGCCAGCAGCCGCGGTAATTCCAGCTCCAATAGCGTATATTAAACTTGTTGCAGTTAAAAAGCTCGTAGTTGAATTTTTGCGTGGTGTTAATATTGACTGATGTCGAGATTGCACTTCGCTTTTGGGATTTTTCCCTTTTTACTTTGAGAAAATTAGAGTGTTTCAAGCAGACTTTTGTCTTGAATACTTCAGCATGGAATAATAGAGTAGGACTTTGGTTCTATTTTGTTGGTTTGTGAACCTTAGTAATGGTTAATAGGAACGGTTGGGGGCATTCGTATT
MagnaDeer5B	Netherlands	Capreolus capreolus		Babesia capreoli	no ambiguous nucleotides	AAATAACAATACAGGGCAATTGTCTTGTAATTGGAATGATGGTGACCTAAACCCTCACCAGAGTAACAATTGGAGGGCAAGTCTGGTGCCAGCAGCCGCGGTAATTCCAGCTCCAATAGCGTATATTAAACTTGTTGCAGTTAAAAAGCTCGTAGTTGAATTTTTGCGTGGTGTTAATATTGACTGATGTCGAGATTGCACTTCGCTTTTGGGATTTTTCCCTTTTTACTTTGAGAAAATTAGAGTGTTTCAAGCAGACTTTTGTCTTGAATACTTCAGCATGGAATAATAGAGTAGGACTTTGGTTCTATTTTGTTGGTTTGTGAACCTTAGTAATGGTTAATAGGAACGGTTGGGGGCATTCGTATT
MagnaDeer5D	Netherlands	Capreolus capreolus		Babesia capreoli	no ambiguous nucleotides	AAATAACAATACAGGGCAATTGTCTTGTAATTGGAATGATGGTGACCTAAACCCTCACCAGAGTAACAATTGGAGGGCAAGTCTGGTGCCAGCAGCCGCGGTAATTCCAGCTCCAATAGCGTATATTAAACTTGTTGCAGTTAAAAAGCTCGTAGTTGAATTTTTGCGTGGTGTTAATATTGACTGATGTCGAGATTGCACTTCGCTTTTGGGATTTTTCCCTTTTTACTTTGAGAAAATTAGAGTGTTTCAAGCAGACTTTTGTCTTGAATACTTCAGCATGGAATAATAGAGTAGGACTTTGGTTCTATTTTGTTGGTTTGTGAACCTTAGTAATGGTTAATAGGAACGGTTGGGGGCATTCGTATT
MagnaDeer60A	Netherlands	Capreolus capreolus		Babesia capreoli	no ambiguous nucleotides	AAATAACAATACAGGGCAATTGTCTTGTAATTGGAATGATGGTGACCTAAACCCTCACCAGAGTAACAATTGGAGGGCAAGTCTGGTGCCAGCAGCCGCGGTAATTCCAGCTCCAATAGCGTATATTAAACTTGTTGCAGTTAAAAAGCTCGTAGTTGAATTTTTGCGTGGTGTTAATATTGACTGATGTCGAGATTGCACTTCGCTTTTGGGATTTTTCCCTTTTTACTTTGAGAAAATTAGAGTGTTTCAAGCAGACTTTTGTCTTGAATACTTCAGCATGGAATAATAGAGTAGGACTTTGGTTCTATTTTGTTGGTTTGTGAACCTTAGTAATGGTTAATAGGAACGGTTGGGGGCATTCGTATT
MagnaDeer60C	Netherlands	Capreolus capreolus		Babesia capreoli	no ambiguous nucleotides	AAATAACAATACAGGGCAATTGTCTTGTAATTGGAATGATGGTGACCTAAACCCTCACCAGAGTAACAATTGGAGGGCAAGTCTGGTGCCAGCAGCCGCGGTAATTCCAGCTCCAATAGCGTATATTAAACTTGTTGCAGTTAAAAAGCTCGTAGTTGAATTTTTGCGTGGTGTTAATATTGACTGATGTCGAGATTGCACTTCGCTTTTGGGATTTTTCCCTTTTTACTTTGAGAAAATTAGAGTGTTTCAAGCAGACTTTTGTCTTGAATACTTCAGCATGGAATAATAGAGTAGGACTTTGGTTCTATTTTGTTGGTTTGTGAACCTTAGTAATGGTTAATAGGAACGGTTGGGGGCATTCGTATT
MagnaDeer60G	Netherlands	Capreolus capreolus		Babesia capreoli	no ambiguous nucleotides	AAATAACAATACAGGGCAATTGTCTTGTAATTGGAATGATGGTGACCTAAACCCTCACCAGAGTAACAATTGGAGGGCAAGTCTGGTGCCAGCAGCCGCGGTAATTCCAGCTCCAATAGCGTATATTAAACTTGTTGCAGTTAAAAAGCTCGTAGTTGAATTTTTGCGTGGTGTTAATATTGACTGATGTCGAGATTGCACTTCGCTTTTGGGATTTTTCCCTTTTTACTTTGAGAAAATTAGAGTGTTTCAAGCAGACTTTTGTCTTGAATACTTCAGCATGGAATAATAGAGTAGGACTTTGGTTCTATTTTGTTGGTTTGTGAACCTTAGTAATGGTTAATAGGAACGGTTGGGGGCATTCGTATT
MagnaDeer61A	Netherlands	Capreolus capreolus		Babesia capreoli	no ambiguous nucleotides	AAATAACAATACAGGGCAATTGTCTTGTAATTGGAATGATGGTGACCTAAACCCTCACCAGAGTAACAATTGGAGGGCAAGTCTGGTGCCAGCAGCCGCGGTAATTCCAGCTCCAATAGCGTATATTAAACTTGTTGCAGTTAAAAAGCTCGTAGTTGAATTTTTGCGTGGTGTTAATATTGACTGATGTCGAGATTGCACTTCGCTTTTGGGATTTTTCCCTTTTTACTTTGAGAAAATTAGAGTGTTTCAAGCAGACTTTTGTCTTGAATACTTCAGCATGGAATAATAGAGTAGGACTTTGGTTCTATTTTGTTGGTTTGTGAACCTTAGTAATGGTTAATAGGAACGGTTGGGGGCATTCGTATT
MagnaDeer61D	Netherlands	Capreolus capreolus		Babesia capreoli	no ambiguous nucleotides	AAATAACAATACAGGGCAATTGTCTTGTAATTGGAATGATGGTGACCTAAACCCTCACCAGAGTAACAATTGGAGGGCAAGTCTGGTGCCAGCAGCCGCGGTAATTCCAGCTCCAATAGCGTATATTAAACTTGTTGCAGTTAAAAAGCTCGTAGTTGAATTTTTGCGTGGTGTTAATATTGACTGATGTCGAGATTGCACTTCGCTTTTGGGATTTTTCCCTTTTTACTTTGAGAAAATTAGAGTGTTTCAAGCAGACTTTTGTCTTGAATACTTCAGCATGGAATAATAGAGTAGGACTTTGGTTCTATTTTGTTGGTTTGTGAACCTTAGTAATGGTTAATAGGAACGGTTGGGGGCATTCGTATT
MagnaDeer62A	Netherlands	Capreolus capreolus		Babesia capreoli	no ambiguous nucleotides	AAATAACAATACAGGGCAATTGTCTTGTAATTGGAATGATGGTGACCTAAACCCTCACCAGAGTAACAATTGGAGGGCAAGTCTGGTGCCAGCAGCCGCGGTAATTCCAGCTCCAATAGCGTATATTAAACTTGTTGCAGTTAAAAAGCTCGTAGTTGAATTTTTGCGTGGTGTTAATATTGACTGATGTCGAGATTGCACTTCGCTTTTGGGATTTTTCCCTTTTTACTTTGAGAAAATTAGAGTGTTTCAAGCAGACTTTTGTCTTGAATACTTCAGCATGGAATAATAGAGTAGGACTTTGGTTCTATTTTGTTGGTTTGTGAACCTTAGTAATGGTTAATAGGAACGGTTGGGGGCATTCGTATT
MagnaDeer62F	Netherlands	Capreolus capreolus		Babesia capreoli	no ambiguous nucleotides	AAATAACAATACAGGGCAATTGTCTTGTAATTGGAATGATGGTGACCTAAACCCTCACCAGAGTAACAATTGGAGGGCAAGTCTGGTGCCAGCAGCCGCGGTAATTCCAGCTCCAATAGCGTATATTAAACTTGTTGCAGTTAAAAAGCTCGTAGTTGAATTTTTGCGTGGTGTTAATATTGACTGATGTCGAGATTGCACTTCGCTTTTGGGATTTTTCCCTTTTTACTTTGAGAAAATTAGAGTGTTTCAAGCAGACTTTTGTCTTGAATACTTCAGCATGGAATAATAGAGTAGGACTTTGGTTCTATTTTGTTGGTTTGTGAACCTTAGTAATGGTTAATAGGAACGGTTGGGGGCATTCGTATT
MagnaDeer62H	Netherlands	Capreolus capreolus		Babesia capreoli	no ambiguous nucleotides	AAATAACAATACAGGGCAATTGTCTTGTAATTGGAATGATGGTGACCTAAACCCTCACCAGAGTAACAATTGGAGGGCAAGTCTGGTGCCAGCAGCCGCGGTAATTCCAGCTCCAATAGCGTATATTAAACTTGTTGCAGTTAAAAAGCTCGTAGTTGAATTTTTGCGTGGTGTTAATATTGACTGATGTCGAGATTGCACTTCGCTTTTGGGATTTTTCCCTTTTTACTTTGAGAAAATTAGAGTGTTTCAAGCAGACTTTTGTCTTGAATACTTCAGCATGGAATAATAGAGTAGGACTTTGGTTCTATTTTGTTGGTTTGTGAACCTTAGTAATGGTTAATAGGAACGGTTGGGGGCATTCGTATT
MagnaDeer63B	Netherlands	Capreolus capreolus		Babesia capreoli	no ambiguous nucleotides	AAATAACAATACAGGGCAATTGTCTTGTAATTGGAATGATGGTGACCTAAACCCTCACCAGAGTAACAATTGGAGGGCAAGTCTGGTGCCAGCAGCCGCGGTAATTCCAGCTCCAATAGCGTATATTAAACTTGTTGCAGTTAAAAAGCTCGTAGTTGAATTTTTGCGTGGTGTTAATATTGACTGATGTCGAGATTGCACTTCGCTTTTGGGATTTTTCCCTTTTTACTTTGAGAAAATTAGAGTGTTTCAAGCAGACTTTTGTCTTGAATACTTCAGCATGGAATAATAGAGTAGGACTTTGGTTCTATTTTGTTGGTTTGTGAACCTTAGTAATGGTTAATAGGAACGGTTGGGGGCATTCGTATT
MagnaDeer63E	Netherlands	Capreolus capreolus		Babesia capreoli	no ambiguous nucleotides	AAATAACAATACAGGGCAATTGTCTTGTAATTGGAATGATGGTGACCTAAACCCTCACCAGAGTAACAATTGGAGGGCAAGTCTGGTGCCAGCAGCCGCGGTAATTCCAGCTCCAATAGCGTATATTAAACTTGTTGCAGTTAAAAAGCTCGTAGTTGAATTTTTGCGTGGTGTTAATATTGACTGATGTCGAGATTGCACTTCGCTTTTGGGATTTTTCCCTTTTTACTTTGAGAAAATTAGAGTGTTTCAAGCAGACTTTTGTCTTGAATACTTCAGCATGGAATAATAGAGTAGGACTTTGGTTCTATTTTGTTGGTTTGTGAACCTTAGTAATGGTTAATAGGAACGGTTGGGGGCATTCGTATT
MagnaDeer63F	Netherlands	Capreolus capreolus		Babesia capreoli	no ambiguous nucleotides	AAATAACAATACAGGGCAATTGTCTTGTAATTGGAATGATGGTGACCTAAACCCTCACCAGAGTAACAATTGGAGGGCAAGTCTGGTGCCAGCAGCCGCGGTAATTCCAGCTCCAATAGCGTATATTAAACTTGTTGCAGTTAAAAAGCTCGTAGTTGAATTTTTGCGTGGTGTTAATATTGACTGATGTCGAGATTGCACTTCGCTTTTGGGATTTTTCCCTTTTTACTTTGAGAAAATTAGAGTGTTTCAAGCAGACTTTTGTCTTGAATACTTCAGCATGGAATAATAGAGTAGGACTTTGGTTCTATTTTGTTGGTTTGTGAACCTTAGTAATGGTTAATAGGAACGGTTGGGGGCATTCGTATT
MagnaDeer63G	Netherlands	Capreolus capreolus		Babesia capreoli	no ambiguous nucleotides	AAATAACAATACAGGGCAATTGTCTTGTAATTGGAATGATGGTGACCTAAACCCTCACCAGAGTAACAATTGGAGGGCAAGTCTGGTGCCAGCAGCCGCGGTAATTCCAGCTCCAATAGCGTATATTAAACTTGTTGCAGTTAAAAAGCTCGTAGTTGAATTTTTGCGTGGTGTTAATATTGACTGATGTCGAGATTGCACTTCGCTTTTGGGATTTTTCCCTTTTTACTTTGAGAAAATTAGAGTGTTTCAAGCAGACTTTTGTCTTGAATACTTCAGCATGGAATAATAGAGTAGGACTTTGGTTCTATTTTGTTGGTTTGTGAACCTTAGTAATGGTTAATAGGAACGGTTGGGGGCATTCGTATT
MagnaDeer63H	Netherlands	Capreolus capreolus		Babesia capreoli	no ambiguous nucleotides	AAATAACAATACAGGGCAATTGTCTTGTAATTGGAATGATGGTGACCTAAACCCTCACCAGAGTAACAATTGGAGGGCAAGTCTGGTGCCAGCAGCCGCGGTAATTCCAGCTCCAATAGCGTATATTAAACTTGTTGCAGTTAAAAAGCTCGTAGTTGAATTTTTGCGTGGTGTTAATATTGACTGATGTCGAGATTGCACTTCGCTTTTGGGATTTTTCCCTTTTTACTTTGAGAAAATTAGAGTGTTTCAAGCAGACTTTTGTCTTGAATACTTCAGCATGGAATAATAGAGTAGGACTTTGGTTCTATTTTGTTGGTTTGTGAACCTTAGTAATGGTTAATAGGAACGGTTGGGGGCATTCGTATT
MagnaDeer64B	Netherlands	Capreolus capreolus		Babesia capreoli	no ambiguous nucleotides	AAATAACAATACAGGGCAATTGTCTTGTAATTGGAATGATGGTGACCTAAACCCTCACCAGAGTAACAATTGGAGGGCAAGTCTGGTGCCAGCAGCCGCGGTAATTCCAGCTCCAATAGCGTATATTAAACTTGTTGCAGTTAAAAAGCTCGTAGTTGAATTTTTGCGTGGTGTTAATATTGACTGATGTCGAGATTGCACTTCGCTTTTGGGATTTTTCCCTTTTTACTTTGAGAAAATTAGAGTGTTTCAAGCAGACTTTTGTCTTGAATACTTCAGCATGGAATAATAGAGTAGGACTTTGGTTCTATTTTGTTGGTTTGTGAACCTTAGTAATGGTTAATAGGAACGGTTGGGGGCATTCGTATT
MagnaDeer64C	Netherlands	Capreolus capreolus		Babesia capreoli	no ambiguous nucleotides	AAATAACAATACAGGGCAATTGTCTTGTAATTGGAATGATGGTGACCTAAACCCTCACCAGAGTAACAATTGGAGGGCAAGTCTGGTGCCAGCAGCCGCGGTAATTCCAGCTCCAATAGCGTATATTAAACTTGTTGCAGTTAAAAAGCTCGTAGTTGAATTTTTGCGTGGTGTTAATATTGACTGATGTCGAGATTGCACTTCGCTTTTGGGATTTTTCCCTTTTTACTTTGAGAAAATTAGAGTGTTTCAAGCAGACTTTTGTCTTGAATACTTCAGCATGGAATAATAGAGTAGGACTTTGGTTCTATTTTGTTGGTTTGTGAACCTTAGTAATGGTTAATAGGAACGGTTGGGGGCATTCGTATT
MagnaDeer64E	Netherlands	Capreolus capreolus		Babesia capreoli	no ambiguous nucleotides	AAATAACAATACAGGGCAATTGTCTTGTAATTGGAATGATGGTGACCTAAACCCTCACCAGAGTAACAATTGGAGGGCAAGTCTGGTGCCAGCAGCCGCGGTAATTCCAGCTCCAATAGCGTATATTAAACTTGTTGCAGTTAAAAAGCTCGTAGTTGAATTTTTGCGTGGTGTTAATATTGACTGATGTCGAGATTGCACTTCGCTTTTGGGATTTTTCCCTTTTTACTTTGAGAAAATTAGAGTGTTTCAAGCAGACTTTTGTCTTGAATACTTCAGCATGGAATAATAGAGTAGGACTTTGGTTCTATTTTGTTGGTTTGTGAACCTTAGTAATGGTTAATAGGAACGGTTGGGGGCATTCGTATT
MagnaDeer64H	Netherlands	Capreolus capreolus		Babesia capreoli	no ambiguous nucleotides	AAATAACAATACAGGGCAATTGTCTTGTAATTGGAATGATGGTGACCTAAACCCTCACCAGAGTAACAATTGGAGGGCAAGTCTGGTGCCAGCAGCCGCGGTAATTCCAGCTCCAATAGCGTATATTAAACTTGTTGCAGTTAAAAAGCTCGTAGTTGAATTTTTGCGTGGTGTTAATATTGACTGATGTCGAGATTGCACTTCGCTTTTGGGATTTTTCCCTTTTTACTTTGAGAAAATTAGAGTGTTTCAAGCAGACTTTTGTCTTGAATACTTCAGCATGGAATAATAGAGTAGGACTTTGGTTCTATTTTGTTGGTTTGTGAACCTTAGTAATGGTTAATAGGAACGGTTGGGGGCATTCGTATT
MagnaDeer65A	Netherlands	Capreolus capreolus		Babesia capreoli	no ambiguous nucleotides	AAATAACAATACAGGGCAATTGTCTTGTAATTGGAATGATGGTGACCTAAACCCTCACCAGAGTAACAATTGGAGGGCAAGTCTGGTGCCAGCAGCCGCGGTAATTCCAGCTCCAATAGCGTATATTAAACTTGTTGCAGTTAAAAAGCTCGTAGTTGAATTTTTGCGTGGTGTTAATATTGACTGATGTCGAGATTGCACTTCGCTTTTGGGATTTTTCCCTTTTTACTTTGAGAAAATTAGAGTGTTTCAAGCAGACTTTTGTCTTGAATACTTCAGCATGGAATAATAGAGTAGGACTTTGGTTCTATTTTGTTGGTTTGTGAACCTTAGTAATGGTTAATAGGAACGGTTGGGGGCATTCGTATT
MagnaDeer65B	Netherlands	Capreolus capreolus		Babesia capreoli	no ambiguous nucleotides	AAATAACAATACAGGGCAATTGTCTTGTAATTGGAATGATGGTGACCTAAACCCTCACCAGAGTAACAATTGGAGGGCAAGTCTGGTGCCAGCAGCCGCGGTAATTCCAGCTCCAATAGCGTATATTAAACTTGTTGCAGTTAAAAAGCTCGTAGTTGAATTTTTGCGTGGTGTTAATATTGACTGATGTCGAGATTGCACTTCGCTTTTGGGATTTTTCCCTTTTTACTTTGAGAAAATTAGAGTGTTTCAAGCAGACTTTTGTCTTGAATACTTCAGCATGGAATAATAGAGTAGGACTTTGGTTCTATTTTGTTGGTTTGTGAACCTTAGTAATGGTTAATAGGAACGGTTGGGGGCATTCGTATT
MagnaDeer65C	Netherlands	Capreolus capreolus		Babesia capreoli	no ambiguous nucleotides	AAATAACAATACAGGGCAATTGTCTTGTAATTGGAATGATGGTGACCTAAACCCTCACCAGAGTAACAATTGGAGGGCAAGTCTGGTGCCAGCAGCCGCGGTAATTCCAGCTCCAATAGCGTATATTAAACTTGTTGCAGTTAAAAAGCTCGTAGTTGAATTTTTGCGTGGTGTTAATATTGACTGATGTCGAGATTGCACTTCGCTTTTGGGATTTTTCCCTTTTTACTTTGAGAAAATTAGAGTGTTTCAAGCAGACTTTTGTCTTGAATACTTCAGCATGGAATAATAGAGTAGGACTTTGGTTCTATTTTGTTGGTTTGTGAACCTTAGTAATGGTTAATAGGAACGGTTGGGGGCATTCGTATT
MagnaDeer65D	Netherlands	Capreolus capreolus		Babesia capreoli	no ambiguous nucleotides	AAATAACAATACAGGGCAATTGTCTTGTAATTGGAATGATGGTGACCTAAACCCTCACCAGAGTAACAATTGGAGGGCAAGTCTGGTGCCAGCAGCCGCGGTAATTCCAGCTCCAATAGCGTATATTAAACTTGTTGCAGTTAAAAAGCTCGTAGTTGAATTTTTGCGTGGTGTTAATATTGACTGATGTCGAGATTGCACTTCGCTTTTGGGATTTTTCCCTTTTTACTTTGAGAAAATTAGAGTGTTTCAAGCAGACTTTTGTCTTGAATACTTCAGCATGGAATAATAGAGTAGGACTTTGGTTCTATTTTGTTGGTTTGTGAACCTTAGTAATGGTTAATAGGAACGGTTGGGGGCATTCGTATT
MagnaDeer65G	Netherlands	Capreolus capreolus		Babesia capreoli	no ambiguous nucleotides	AAATAACAATACAGGGCAATTGTCTTGTAATTGGAATGATGGTGACCTAAACCCTCACCAGAGTAACAATTGGAGGGCAAGTCTGGTGCCAGCAGCCGCGGTAATTCCAGCTCCAATAGCGTATATTAAACTTGTTGCAGTTAAAAAGCTCGTAGTTGAATTTTTGCGTGGTGTTAATATTGACTGATGTCGAGATTGCACTTCGCTTTTGGGATTTTTCCCTTTTTACTTTGAGAAAATTAGAGTGTTTCAAGCAGACTTTTGTCTTGAATACTTCAGCATGGAATAATAGAGTAGGACTTTGGTTCTATTTTGTTGGTTTGTGAACCTTAGTAATGGTTAATAGGAACGGTTGGGGGCATTCGTATT
MagnaDeer66D	Netherlands	Capreolus capreolus		Babesia capreoli	no ambiguous nucleotides	AAATAACAATACAGGGCAATTGTCTTGTAATTGGAATGATGGTGACCTAAACCCTCACCAGAGTAACAATTGGAGGGCAAGTCTGGTGCCAGCAGCCGCGGTAATTCCAGCTCCAATAGCGTATATTAAACTTGTTGCAGTTAAAAAGCTCGTAGTTGAATTTTTGCGTGGTGTTAATATTGACTGATGTCGAGATTGCACTTCGCTTTTGGGATTTTTCCCTTTTTACTTTGAGAAAATTAGAGTGTTTCAAGCAGACTTTTGTCTTGAATACTTCAGCATGGAATAATAGAGTAGGACTTTGGTTCTATTTTGTTGGTTTGTGAACCTTAGTAATGGTTAATAGGAACGGTTGGGGGCATTCGTATT
MagnaDeer66E	Netherlands	Capreolus capreolus		Babesia capreoli	no ambiguous nucleotides	AAATAACAATACAGGGCAATTGTCTTGTAATTGGAATGATGGTGACCTAAACCCTCACCAGAGTAACAATTGGAGGGCAAGTCTGGTGCCAGCAGCCGCGGTAATTCCAGCTCCAATAGCGTATATTAAACTTGTTGCAGTTAAAAAGCTCGTAGTTGAATTTTTGCGTGGTGTTAATATTGACTGATGTCGAGATTGCACTTCGCTTTTGGGATTTTTCCCTTTTTACTTTGAGAAAATTAGAGTGTTTCAAGCAGACTTTTGTCTTGAATACTTCAGCATGGAATAATAGAGTAGGACTTTGGTTCTATTTTGTTGGTTTGTGAACCTTAGTAATGGTTAATAGGAACGGTTGGGGGCATTCGTATT
MagnaDeer66F	Netherlands	Capreolus capreolus		Babesia capreoli	no ambiguous nucleotides	AAATAACAATACAGGGCAATTGTCTTGTAATTGGAATGATGGTGACCTAAACCCTCACCAGAGTAACAATTGGAGGGCAAGTCTGGTGCCAGCAGCCGCGGTAATTCCAGCTCCAATAGCGTATATTAAACTTGTTGCAGTTAAAAAGCTCGTAGTTGAATTTTTGCGTGGTGTTAATATTGACTGATGTCGAGATTGCACTTCGCTTTTGGGATTTTTCCCTTTTTACTTTGAGAAAATTAGAGTGTTTCAAGCAGACTTTTGTCTTGAATACTTCAGCATGGAATAATAGAGTAGGACTTTGGTTCTATTTTGTTGGTTTGTGAACCTTAGTAATGGTTAATAGGAACGGTTGGGGGCATTCGTATT
MagnaDeer67A	Netherlands	Capreolus capreolus		Babesia capreoli	no ambiguous nucleotides	AAATAACAATACAGGGCAATTGTCTTGTAATTGGAATGATGGTGACCTAAACCCTCACCAGAGTAACAATTGGAGGGCAAGTCTGGTGCCAGCAGCCGCGGTAATTCCAGCTCCAATAGCGTATATTAAACTTGTTGCAGTTAAAAAGCTCGTAGTTGAATTTTTGCGTGGTGTTAATATTGACTGATGTCGAGATTGCACTTCGCTTTTGGGATTTTTCCCTTTTTACTTTGAGAAAATTAGAGTGTTTCAAGCAGACTTTTGTCTTGAATACTTCAGCATGGAATAATAGAGTAGGACTTTGGTTCTATTTTGTTGGTTTGTGAACCTTAGTAATGGTTAATAGGAACGGTTGGGGGCATTCGTATT
MagnaDeer67B	Netherlands	Capreolus capreolus		Babesia capreoli	no ambiguous nucleotides	AAATAACAATACAGGGCAATTGTCTTGTAATTGGAATGATGGTGACCTAAACCCTCACCAGAGTAACAATTGGAGGGCAAGTCTGGTGCCAGCAGCCGCGGTAATTCCAGCTCCAATAGCGTATATTAAACTTGTTGCAGTTAAAAAGCTCGTAGTTGAATTTTTGCGTGGTGTTAATATTGACTGATGTCGAGATTGCACTTCGCTTTTGGGATTTTTCCCTTTTTACTTTGAGAAAATTAGAGTGTTTCAAGCAGACTTTTGTCTTGAATACTTCAGCATGGAATAATAGAGTAGGACTTTGGTTCTATTTTGTTGGTTTGTGAACCTTAGTAATGGTTAATAGGAACGGTTGGGGGCATTCGTATT
MagnaDeer67D	Netherlands	Capreolus capreolus		Babesia capreoli	no ambiguous nucleotides	AAATAACAATACAGGGCAATTGTCTTGTAATTGGAATGATGGTGACCTAAACCCTCACCAGAGTAACAATTGGAGGGCAAGTCTGGTGCCAGCAGCCGCGGTAATTCCAGCTCCAATAGCGTATATTAAACTTGTTGCAGTTAAAAAGCTCGTAGTTGAATTTTTGCGTGGTGTTAATATTGACTGATGTCGAGATTGCACTTCGCTTTTGGGATTTTTCCCTTTTTACTTTGAGAAAATTAGAGTGTTTCAAGCAGACTTTTGTCTTGAATACTTCAGCATGGAATAATAGAGTAGGACTTTGGTTCTATTTTGTTGGTTTGTGAACCTTAGTAATGGTTAATAGGAACGGTTGGGGGCATTCGTATT
MagnaDeer67E	Netherlands	Capreolus capreolus		Babesia capreoli	no ambiguous nucleotides	AAATAACAATACAGGGCAATTGTCTTGTAATTGGAATGATGGTGACCTAAACCCTCACCAGAGTAACAATTGGAGGGCAAGTCTGGTGCCAGCAGCCGCGGTAATTCCAGCTCCAATAGCGTATATTAAACTTGTTGCAGTTAAAAAGCTCGTAGTTGAATTTTTGCGTGGTGTTAATATTGACTGATGTCGAGATTGCACTTCGCTTTTGGGATTTTTCCCTTTTTACTTTGAGAAAATTAGAGTGTTTCAAGCAGACTTTTGTCTTGAATACTTCAGCATGGAATAATAGAGTAGGACTTTGGTTCTATTTTGTTGGTTTGTGAACCTTAGTAATGGTTAATAGGAACGGTTGGGGGCATTCGTATT
MagnaDeer67G	Netherlands	Capreolus capreolus		Babesia capreoli	no ambiguous nucleotides	AAATAACAATACAGGGCAATTGTCTTGTAATTGGAATGATGGTGACCTAAACCCTCACCAGAGTAACAATTGGAGGGCAAGTCTGGTGCCAGCAGCCGCGGTAATTCCAGCTCCAATAGCGTATATTAAACTTGTTGCAGTTAAAAAGCTCGTAGTTGAATTTTTGCGTGGTGTTAATATTGACTGATGTCGAGATTGCACTTCGCTTTTGGGATTTTTCCCTTTTTACTTTGAGAAAATTAGAGTGTTTCAAGCAGACTTTTGTCTTGAATACTTCAGCATGGAATAATAGAGTAGGACTTTGGTTCTATTTTGTTGGTTTGTGAACCTTAGTAATGGTTAATAGGAACGGTTGGGGGCATTCGTATT
MagnaDeer67H	Netherlands	Capreolus capreolus		Babesia capreoli	no ambiguous nucleotides	AAATAACAATACAGGGCAATTGTCTTGTAATTGGAATGATGGTGACCTAAACCCTCACCAGAGTAACAATTGGAGGGCAAGTCTGGTGCCAGCAGCCGCGGTAATTCCAGCTCCAATAGCGTATATTAAACTTGTTGCAGTTAAAAAGCTCGTAGTTGAATTTTTGCGTGGTGTTAATATTGACTGATGTCGAGATTGCACTTCGCTTTTGGGATTTTTCCCTTTTTACTTTGAGAAAATTAGAGTGTTTCAAGCAGACTTTTGTCTTGAATACTTCAGCATGGAATAATAGAGTAGGACTTTGGTTCTATTTTGTTGGTTTGTGAACCTTAGTAATGGTTAATAGGAACGGTTGGGGGCATTCGTATT
MagnaDeer68B	Netherlands	Capreolus capreolus		Babesia capreoli	no ambiguous nucleotides	AAATAACAATACAGGGCAATTGTCTTGTAATTGGAATGATGGTGACCTAAACCCTCACCAGAGTAACAATTGGAGGGCAAGTCTGGTGCCAGCAGCCGCGGTAATTCCAGCTCCAATAGCGTATATTAAACTTGTTGCAGTTAAAAAGCTCGTAGTTGAATTTTTGCGTGGTGTTAATATTGACTGATGTCGAGATTGCACTTCGCTTTTGGGATTTTTCCCTTTTTACTTTGAGAAAATTAGAGTGTTTCAAGCAGACTTTTGTCTTGAATACTTCAGCATGGAATAATAGAGTAGGACTTTGGTTCTATTTTGTTGGTTTGTGAACCTTAGTAATGGTTAATAGGAACGGTTGGGGGCATTCGTATT
MagnaDeer69A	Netherlands	Capreolus capreolus		Babesia capreoli	no ambiguous nucleotides	AAATAACAATACAGGGCAATTGTCTTGTAATTGGAATGATGGTGACCTAAACCCTCACCAGAGTAACAATTGGAGGGCAAGTCTGGTGCCAGCAGCCGCGGTAATTCCAGCTCCAATAGCGTATATTAAACTTGTTGCAGTTAAAAAGCTCGTAGTTGAATTTTTGCGTGGTGTTAATATTGACTGATGTCGAGATTGCACTTCGCTTTTGGGATTTTTCCCTTTTTACTTTGAGAAAATTAGAGTGTTTCAAGCAGACTTTTGTCTTGAATACTTCAGCATGGAATAATAGAGTAGGACTTTGGTTCTATTTTGTTGGTTTGTGAACCTTAGTAATGGTTAATAGGAACGGTTGGGGGCATTCGTATT
MagnaDeer69D	Netherlands	Capreolus capreolus		Babesia capreoli	no ambiguous nucleotides	AAATAACAATACAGGGCAATTGTCTTGTAATTGGAATGATGGTGACCTAAACCCTCACCAGAGTAACAATTGGAGGGCAAGTCTGGTGCCAGCAGCCGCGGTAATTCCAGCTCCAATAGCGTATATTAAACTTGTTGCAGTTAAAAAGCTCGTAGTTGAATTTTTGCGTGGTGTTAATATTGACTGATGTCGAGATTGCACTTCGCTTTTGGGATTTTTCCCTTTTTACTTTGAGAAAATTAGAGTGTTTCAAGCAGACTTTTGTCTTGAATACTTCAGCATGGAATAATAGAGTAGGACTTTGGTTCTATTTTGTTGGTTTGTGAACCTTAGTAATGGTTAATAGGAACGGTTGGGGGCATTCGTATT
MagnaDeer69E	Netherlands	Capreolus capreolus		Babesia capreoli	no ambiguous nucleotides	AAATAACAATACAGGGCAATTGTCTTGTAATTGGAATGATGGTGACCTAAACCCTCACCAGAGTAACAATTGGAGGGCAAGTCTGGTGCCAGCAGCCGCGGTAATTCCAGCTCCAATAGCGTATATTAAACTTGTTGCAGTTAAAAAGCTCGTAGTTGAATTTTTGCGTGGTGTTAATATTGACTGATGTCGAGATTGCACTTCGCTTTTGGGATTTTTCCCTTTTTACTTTGAGAAAATTAGAGTGTTTCAAGCAGACTTTTGTCTTGAATACTTCAGCATGGAATAATAGAGTAGGACTTTGGTTCTATTTTGTTGGTTTGTGAACCTTAGTAATGGTTAATAGGAACGGTTGGGGGCATTCGTATT
MagnaDeer69F	Netherlands	Capreolus capreolus		Babesia capreoli	no ambiguous nucleotides	AAATAACAATACAGGGCAATTGTCTTGTAATTGGAATGATGGTGACCTAAACCCTCACCAGAGTAACAATTGGAGGGCAAGTCTGGTGCCAGCAGCCGCGGTAATTCCAGCTCCAATAGCGTATATTAAACTTGTTGCAGTTAAAAAGCTCGTAGTTGAATTTTTGCGTGGTGTTAATATTGACTGATGTCGAGATTGCACTTCGCTTTTGGGATTTTTCCCTTTTTACTTTGAGAAAATTAGAGTGTTTCAAGCAGACTTTTGTCTTGAATACTTCAGCATGGAATAATAGAGTAGGACTTTGGTTCTATTTTGTTGGTTTGTGAACCTTAGTAATGGTTAATAGGAACGGTTGGGGGCATTCGTATT
MagnaDeer69G	Netherlands	Capreolus capreolus		Babesia capreoli	no ambiguous nucleotides	AAATAACAATACAGGGCAATTGTCTTGTAATTGGAATGATGGTGACCTAAACCCTCACCAGAGTAACAATTGGAGGGCAAGTCTGGTGCCAGCAGCCGCGGTAATTCCAGCTCCAATAGCGTATATTAAACTTGTTGCAGTTAAAAAGCTCGTAGTTGAATTTTTGCGTGGTGTTAATATTGACTGATGTCGAGATTGCACTTCGCTTTTGGGATTTTTCCCTTTTTACTTTGAGAAAATTAGAGTGTTTCAAGCAGACTTTTGTCTTGAATACTTCAGCATGGAATAATAGAGTAGGACTTTGGTTCTATTTTGTTGGTTTGTGAACCTTAGTAATGGTTAATAGGAACGGTTGGGGGCATTCGTATT
MagnaDeer6D	Netherlands	Capreolus capreolus		Babesia capreoli	no ambiguous nucleotides	AAATAACAATACAGGGCAATTGTCTTGTAATTGGAATGATGGTGACCTAAACCCTCACCAGAGTAACAATTGGAGGGCAAGTCTGGTGCCAGCAGCCGCGGTAATTCCAGCTCCAATAGCGTATATTAAACTTGTTGCAGTTAAAAAGCTCGTAGTTGAATTTTTGCGTGGTGTTAATATTGACTGATGTCGAGATTGCACTTCGCTTTTGGGATTTTTCCCTTTTTACTTTGAGAAAATTAGAGTGTTTCAAGCAGACTTTTGTCTTGAATACTTCAGCATGGAATAATAGAGTAGGACTTTGGTTCTATTTTGTTGGTTTGTGAACCTTAGTAATGGTTAATAGGAACGGTTGGGGGCATTCGTATT
MagnaDeer6E	Netherlands	Capreolus capreolus		Babesia capreoli	no ambiguous nucleotides	AAATAACAATACAGGGCAATTGTCTTGTAATTGGAATGATGGTGACCTAAACCCTCACCAGAGTAACAATTGGAGGGCAAGTCTGGTGCCAGCAGCCGCGGTAATTCCAGCTCCAATAGCGTATATTAAACTTGTTGCAGTTAAAAAGCTCGTAGTTGAATTTTTGCGTGGTGTTAATATTGACTGATGTCGAGATTGCACTTCGCTTTTGGGATTTTTCCCTTTTTACTTTGAGAAAATTAGAGTGTTTCAAGCAGACTTTTGTCTTGAATACTTCAGCATGGAATAATAGAGTAGGACTTTGGTTCTATTTTGTTGGTTTGTGAACCTTAGTAATGGTTAATAGGAACGGTTGGGGGCATTCGTATT
MagnaDeer6F	Netherlands	Capreolus capreolus		Babesia capreoli	no ambiguous nucleotides	AAATAACAATACAGGGCAATTGTCTTGTAATTGGAATGATGGTGACCTAAACCCTCACCAGAGTAACAATTGGAGGGCAAGTCTGGTGCCAGCAGCCGCGGTAATTCCAGCTCCAATAGCGTATATTAAACTTGTTGCAGTTAAAAAGCTCGTAGTTGAATTTTTGCGTGGTGTTAATATTGACTGATGTCGAGATTGCACTTCGCTTTTGGGATTTTTCCCTTTTTACTTTGAGAAAATTAGAGTGTTTCAAGCAGACTTTTGTCTTGAATACTTCAGCATGGAATAATAGAGTAGGACTTTGGTTCTATTTTGTTGGTTTGTGAACCTTAGTAATGGTTAATAGGAACGGTTGGGGGCATTCGTATT
MagnaDeer6G	Netherlands	Capreolus capreolus		Babesia capreoli	no ambiguous nucleotides	AAATAACAATACAGGGCAATTGTCTTGTAATTGGAATGATGGTGACCTAAACCCTCACCAGAGTAACAATTGGAGGGCAAGTCTGGTGCCAGCAGCCGCGGTAATTCCAGCTCCAATAGCGTATATTAAACTTGTTGCAGTTAAAAAGCTCGTAGTTGAATTTTTGCGTGGTGTTAATATTGACTGATGTCGAGATTGCACTTCGCTTTTGGGATTTTTCCCTTTTTACTTTGAGAAAATTAGAGTGTTTCAAGCAGACTTTTGTCTTGAATACTTCAGCATGGAATAATAGAGTAGGACTTTGGTTCTATTTTGTTGGTTTGTGAACCTTAGTAATGGTTAATAGGAACGGTTGGGGGCATTCGTATT
MagnaDeer6H	Netherlands	Capreolus capreolus		Babesia capreoli	no ambiguous nucleotides	AAATAACAATACAGGGCAATTGTCTTGTAATTGGAATGATGGTGACCTAAACCCTCACCAGAGTAACAATTGGAGGGCAAGTCTGGTGCCAGCAGCCGCGGTAATTCCAGCTCCAATAGCGTATATTAAACTTGTTGCAGTTAAAAAGCTCGTAGTTGAATTTTTGCGTGGTGTTAATATTGACTGATGTCGAGATTGCACTTCGCTTTTGGGATTTTTCCCTTTTTACTTTGAGAAAATTAGAGTGTTTCAAGCAGACTTTTGTCTTGAATACTTCAGCATGGAATAATAGAGTAGGACTTTGGTTCTATTTTGTTGGTTTGTGAACCTTAGTAATGGTTAATAGGAACGGTTGGGGGCATTCGTATT
MagnaDeer70A	Netherlands	Capreolus capreolus		Babesia capreoli	no ambiguous nucleotides	AAATAACAATACAGGGCAATTGTCTTGTAATTGGAATGATGGTGACCTAAACCCTCACCAGAGTAACAATTGGAGGGCAAGTCTGGTGCCAGCAGCCGCGGTAATTCCAGCTCCAATAGCGTATATTAAACTTGTTGCAGTTAAAAAGCTCGTAGTTGAATTTTTGCGTGGTGTTAATATTGACTGATGTCGAGATTGCACTTCGCTTTTGGGATTTTTCCCTTTTTACTTTGAGAAAATTAGAGTGTTTCAAGCAGACTTTTGTCTTGAATACTTCAGCATGGAATAATAGAGTAGGACTTTGGTTCTATTTTGTTGGTTTGTGAACCTTAGTAATGGTTAATAGGAACGGTTGGGGGCATTCGTATT
MagnaDeer70B	Netherlands	Capreolus capreolus		Babesia capreoli	no ambiguous nucleotides	AAATAACAATACAGGGCAATTGTCTTGTAATTGGAATGATGGTGACCTAAACCCTCACCAGAGTAACAATTGGAGGGCAAGTCTGGTGCCAGCAGCCGCGGTAATTCCAGCTCCAATAGCGTATATTAAACTTGTTGCAGTTAAAAAGCTCGTAGTTGAATTTTTGCGTGGTGTTAATATTGACTGATGTCGAGATTGCACTTCGCTTTTGGGATTTTTCCCTTTTTACTTTGAGAAAATTAGAGTGTTTCAAGCAGACTTTTGTCTTGAATACTTCAGCATGGAATAATAGAGTAGGACTTTGGTTCTATTTTGTTGGTTTGTGAACCTTAGTAATGGTTAATAGGAACGGTTGGGGGCATTCGTATT
MagnaDeer70C	Netherlands	Capreolus capreolus		Babesia capreoli	no ambiguous nucleotides	AAATAACAATACAGGGCAATTGTCTTGTAATTGGAATGATGGTGACCTAAACCCTCACCAGAGTAACAATTGGAGGGCAAGTCTGGTGCCAGCAGCCGCGGTAATTCCAGCTCCAATAGCGTATATTAAACTTGTTGCAGTTAAAAAGCTCGTAGTTGAATTTTTGCGTGGTGTTAATATTGACTGATGTCGAGATTGCACTTCGCTTTTGGGATTTTTCCCTTTTTACTTTGAGAAAATTAGAGTGTTTCAAGCAGACTTTTGTCTTGAATACTTCAGCATGGAATAATAGAGTAGGACTTTGGTTCTATTTTGTTGGTTTGTGAACCTTAGTAATGGTTAATAGGAACGGTTGGGGGCATTCGTATT
MagnaDeer70D	Netherlands	Capreolus capreolus		Babesia capreoli	no ambiguous nucleotides	AAATAACAATACAGGGCAATTGTCTTGTAATTGGAATGATGGTGACCTAAACCCTCACCAGAGTAACAATTGGAGGGCAAGTCTGGTGCCAGCAGCCGCGGTAATTCCAGCTCCAATAGCGTATATTAAACTTGTTGCAGTTAAAAAGCTCGTAGTTGAATTTTTGCGTGGTGTTAATATTGACTGATGTCGAGATTGCACTTCGCTTTTGGGATTTTTCCCTTTTTACTTTGAGAAAATTAGAGTGTTTCAAGCAGACTTTTGTCTTGAATACTTCAGCATGGAATAATAGAGTAGGACTTTGGTTCTATTTTGTTGGTTTGTGAACCTTAGTAATGGTTAATAGGAACGGTTGGGGGCATTCGTATT
MagnaDeer70F	Netherlands	Capreolus capreolus		Babesia capreoli	no ambiguous nucleotides	AAATAACAATACAGGGCAATTGTCTTGTAATTGGAATGATGGTGACCTAAACCCTCACCAGAGTAACAATTGGAGGGCAAGTCTGGTGCCAGCAGCCGCGGTAATTCCAGCTCCAATAGCGTATATTAAACTTGTTGCAGTTAAAAAGCTCGTAGTTGAATTTTTGCGTGGTGTTAATATTGACTGATGTCGAGATTGCACTTCGCTTTTGGGATTTTTCCCTTTTTACTTTGAGAAAATTAGAGTGTTTCAAGCAGACTTTTGTCTTGAATACTTCAGCATGGAATAATAGAGTAGGACTTTGGTTCTATTTTGTTGGTTTGTGAACCTTAGTAATGGTTAATAGGAACGGTTGGGGGCATTCGTATT
MagnaDeer70G	Netherlands	Capreolus capreolus		Babesia capreoli	no ambiguous nucleotides	AAATAACAATACAGGGCAATTGTCTTGTAATTGGAATGATGGTGACCTAAACCCTCACCAGAGTAACAATTGGAGGGCAAGTCTGGTGCCAGCAGCCGCGGTAATTCCAGCTCCAATAGCGTATATTAAACTTGTTGCAGTTAAAAAGCTCGTAGTTGAATTTTTGCGTGGTGTTAATATTGACTGATGTCGAGATTGCACTTCGCTTTTGGGATTTTTCCCTTTTTACTTTGAGAAAATTAGAGTGTTTCAAGCAGACTTTTGTCTTGAATACTTCAGCATGGAATAATAGAGTAGGACTTTGGTTCTATTTTGTTGGTTTGTGAACCTTAGTAATGGTTAATAGGAACGGTTGGGGGCATTCGTATT
MagnaDeer71A	Netherlands	Capreolus capreolus		Babesia capreoli	no ambiguous nucleotides	AAATAACAATACAGGGCAATTGTCTTGTAATTGGAATGATGGTGACCTAAACCCTCACCAGAGTAACAATTGGAGGGCAAGTCTGGTGCCAGCAGCCGCGGTAATTCCAGCTCCAATAGCGTATATTAAACTTGTTGCAGTTAAAAAGCTCGTAGTTGAATTTTTGCGTGGTGTTAATATTGACTGATGTCGAGATTGCACTTCGCTTTTGGGATTTTTCCCTTTTTACTTTGAGAAAATTAGAGTGTTTCAAGCAGACTTTTGTCTTGAATACTTCAGCATGGAATAATAGAGTAGGACTTTGGTTCTATTTTGTTGGTTTGTGAACCTTAGTAATGGTTAATAGGAACGGTTGGGGGCATTCGTATT
MagnaDeer71B	Netherlands	Capreolus capreolus		Babesia capreoli	no ambiguous nucleotides	AAATAACAATACAGGGCAATTGTCTTGTAATTGGAATGATGGTGACCTAAACCCTCACCAGAGTAACAATTGGAGGGCAAGTCTGGTGCCAGCAGCCGCGGTAATTCCAGCTCCAATAGCGTATATTAAACTTGTTGCAGTTAAAAAGCTCGTAGTTGAATTTTTGCGTGGTGTTAATATTGACTGATGTCGAGATTGCACTTCGCTTTTGGGATTTTTCCCTTTTTACTTTGAGAAAATTAGAGTGTTTCAAGCAGACTTTTGTCTTGAATACTTCAGCATGGAATAATAGAGTAGGACTTTGGTTCTATTTTGTTGGTTTGTGAACCTTAGTAATGGTTAATAGGAACGGTTGGGGGCATTCGTATT
MagnaDeer71D	Netherlands	Capreolus capreolus		Babesia capreoli	no ambiguous nucleotides	AAATAACAATACAGGGCAATTGTCTTGTAATTGGAATGATGGTGACCTAAACCCTCACCAGAGTAACAATTGGAGGGCAAGTCTGGTGCCAGCAGCCGCGGTAATTCCAGCTCCAATAGCGTATATTAAACTTGTTGCAGTTAAAAAGCTCGTAGTTGAATTTTTGCGTGGTGTTAATATTGACTGATGTCGAGATTGCACTTCGCTTTTGGGATTTTTCCCTTTTTACTTTGAGAAAATTAGAGTGTTTCAAGCAGACTTTTGTCTTGAATACTTCAGCATGGAATAATAGAGTAGGACTTTGGTTCTATTTTGTTGGTTTGTGAACCTTAGTAATGGTTAATAGGAACGGTTGGGGGCATTCGTATT
MagnaDeer71E	Netherlands	Capreolus capreolus		Babesia capreoli	no ambiguous nucleotides	AAATAACAATACAGGGCAATTGTCTTGTAATTGGAATGATGGTGACCTAAACCCTCACCAGAGTAACAATTGGAGGGCAAGTCTGGTGCCAGCAGCCGCGGTAATTCCAGCTCCAATAGCGTATATTAAACTTGTTGCAGTTAAAAAGCTCGTAGTTGAATTTTTGCGTGGTGTTAATATTGACTGATGTCGAGATTGCACTTCGCTTTTGGGATTTTTCCCTTTTTACTTTGAGAAAATTAGAGTGTTTCAAGCAGACTTTTGTCTTGAATACTTCAGCATGGAATAATAGAGTAGGACTTTGGTTCTATTTTGTTGGTTTGTGAACCTTAGTAATGGTTAATAGGAACGGTTGGGGGCATTCGTATT
MagnaDeer72A	Netherlands	Capreolus capreolus		Babesia capreoli	no ambiguous nucleotides	AAATAACAATACAGGGCAATTGTCTTGTAATTGGAATGATGGTGACCTAAACCCTCACCAGAGTAACAATTGGAGGGCAAGTCTGGTGCCAGCAGCCGCGGTAATTCCAGCTCCAATAGCGTATATTAAACTTGTTGCAGTTAAAAAGCTCGTAGTTGAATTTTTGCGTGGTGTTAATATTGACTGATGTCGAGATTGCACTTCGCTTTTGGGATTTTTCCCTTTTTACTTTGAGAAAATTAGAGTGTTTCAAGCAGACTTTTGTCTTGAATACTTCAGCATGGAATAATAGAGTAGGACTTTGGTTCTATTTTGTTGGTTTGTGAACCTTAGTAATGGTTAATAGGAACGGTTGGGGGCATTCGTATT
MagnaDeer72E	Netherlands	Capreolus capreolus		Babesia capreoli	no ambiguous nucleotides	AAATAACAATACAGGGCAATTGTCTTGTAATTGGAATGATGGTGACCTAAACCCTCACCAGAGTAACAATTGGAGGGCAAGTCTGGTGCCAGCAGCCGCGGTAATTCCAGCTCCAATAGCGTATATTAAACTTGTTGCAGTTAAAAAGCTCGTAGTTGAATTTTTGCGTGGTGTTAATATTGACTGATGTCGAGATTGCACTTCGCTTTTGGGATTTTTCCCTTTTTACTTTGAGAAAATTAGAGTGTTTCAAGCAGACTTTTGTCTTGAATACTTCAGCATGGAATAATAGAGTAGGACTTTGGTTCTATTTTGTTGGTTTGTGAACCTTAGTAATGGTTAATAGGAACGGTTGGGGGCATTCGTATT
MagnaDeer72F	Netherlands	Capreolus capreolus		Babesia capreoli	no ambiguous nucleotides	AAATAACAATACAGGGCAATTGTCTTGTAATTGGAATGATGGTGACCTAAACCCTCACCAGAGTAACAATTGGAGGGCAAGTCTGGTGCCAGCAGCCGCGGTAATTCCAGCTCCAATAGCGTATATTAAACTTGTTGCAGTTAAAAAGCTCGTAGTTGAATTTTTGCGTGGTGTTAATATTGACTGATGTCGAGATTGCACTTCGCTTTTGGGATTTTTCCCTTTTTACTTTGAGAAAATTAGAGTGTTTCAAGCAGACTTTTGTCTTGAATACTTCAGCATGGAATAATAGAGTAGGACTTTGGTTCTATTTTGTTGGTTTGTGAACCTTAGTAATGGTTAATAGGAACGGTTGGGGGCATTCGTATT
MagnaDeer72G	Netherlands	Capreolus capreolus		Babesia capreoli	no ambiguous nucleotides	AAATAACAATACAGGGCAATTGTCTTGTAATTGGAATGATGGTGACCTAAACCCTCACCAGAGTAACAATTGGAGGGCAAGTCTGGTGCCAGCAGCCGCGGTAATTCCAGCTCCAATAGCGTATATTAAACTTGTTGCAGTTAAAAAGCTCGTAGTTGAATTTTTGCGTGGTGTTAATATTGACTGATGTCGAGATTGCACTTCGCTTTTGGGATTTTTCCCTTTTTACTTTGAGAAAATTAGAGTGTTTCAAGCAGACTTTTGTCTTGAATACTTCAGCATGGAATAATAGAGTAGGACTTTGGTTCTATTTTGTTGGTTTGTGAACCTTAGTAATGGTTAATAGGAACGGTTGGGGGCATTCGTATT
MagnaDeer73C	Netherlands	Capreolus capreolus		Babesia capreoli	no ambiguous nucleotides	AAATAACAATACAGGGCAATTGTCTTGTAATTGGAATGATGGTGACCTAAACCCTCACCAGAGTAACAATTGGAGGGCAAGTCTGGTGCCAGCAGCCGCGGTAATTCCAGCTCCAATAGCGTATATTAAACTTGTTGCAGTTAAAAAGCTCGTAGTTGAATTTTTGCGTGGTGTTAATATTGACTGATGTCGAGATTGCACTTCGCTTTTGGGATTTTTCCCTTTTTACTTTGAGAAAATTAGAGTGTTTCAAGCAGACTTTTGTCTTGAATACTTCAGCATGGAATAATAGAGTAGGACTTTGGTTCTATTTTGTTGGTTTGTGAACCTTAGTAATGGTTAATAGGAACGGTTGGGGGCATTCGTATT
MagnaDeer73D	Netherlands	Capreolus capreolus		Babesia capreoli	no ambiguous nucleotides	AAATAACAATACAGGGCAATTGTCTTGTAATTGGAATGATGGTGACCTAAACCCTCACCAGAGTAACAATTGGAGGGCAAGTCTGGTGCCAGCAGCCGCGGTAATTCCAGCTCCAATAGCGTATATTAAACTTGTTGCAGTTAAAAAGCTCGTAGTTGAATTTTTGCGTGGTGTTAATATTGACTGATGTCGAGATTGCACTTCGCTTTTGGGATTTTTCCCTTTTTACTTTGAGAAAATTAGAGTGTTTCAAGCAGACTTTTGTCTTGAATACTTCAGCATGGAATAATAGAGTAGGACTTTGGTTCTATTTTGTTGGTTTGTGAACCTTAGTAATGGTTAATAGGAACGGTTGGGGGCATTCGTATT
MagnaDeer73F	Netherlands	Capreolus capreolus		Babesia capreoli	no ambiguous nucleotides	AAATAACAATACAGGGCAATTGTCTTGTAATTGGAATGATGGTGACCTAAACCCTCACCAGAGTAACAATTGGAGGGCAAGTCTGGTGCCAGCAGCCGCGGTAATTCCAGCTCCAATAGCGTATATTAAACTTGTTGCAGTTAAAAAGCTCGTAGTTGAATTTTTGCGTGGTGTTAATATTGACTGATGTCGAGATTGCACTTCGCTTTTGGGATTTTTCCCTTTTTACTTTGAGAAAATTAGAGTGTTTCAAGCAGACTTTTGTCTTGAATACTTCAGCATGGAATAATAGAGTAGGACTTTGGTTCTATTTTGTTGGTTTGTGAACCTTAGTAATGGTTAATAGGAACGGTTGGGGGCATTCGTATT
MagnaDeer73H	Netherlands	Capreolus capreolus		Babesia capreoli	no ambiguous nucleotides	AAATAACAATACAGGGCAATTGTCTTGTAATTGGAATGATGGTGACCTAAACCCTCACCAGAGTAACAATTGGAGGGCAAGTCTGGTGCCAGCAGCCGCGGTAATTCCAGCTCCAATAGCGTATATTAAACTTGTTGCAGTTAAAAAGCTCGTAGTTGAATTTTTGCGTGGTGTTAATATTGACTGATGTCGAGATTGCACTTCGCTTTTGGGATTTTTCCCTTTTTACTTTGAGAAAATTAGAGTGTTTCAAGCAGACTTTTGTCTTGAATACTTCAGCATGGAATAATAGAGTAGGACTTTGGTTCTATTTTGTTGGTTTGTGAACCTTAGTAATGGTTAATAGGAACGGTTGGGGGCATTCGTATT
MagnaDeer74A	Netherlands	Capreolus capreolus		Babesia capreoli	no ambiguous nucleotides	AAATAACAATACAGGGCAATTGTCTTGTAATTGGAATGATGGTGACCTAAACCCTCACCAGAGTAACAATTGGAGGGCAAGTCTGGTGCCAGCAGCCGCGGTAATTCCAGCTCCAATAGCGTATATTAAACTTGTTGCAGTTAAAAAGCTCGTAGTTGAATTTTTGCGTGGTGTTAATATTGACTGATGTCGAGATTGCACTTCGCTTTTGGGATTTTTCCCTTTTTACTTTGAGAAAATTAGAGTGTTTCAAGCAGACTTTTGTCTTGAATACTTCAGCATGGAATAATAGAGTAGGACTTTGGTTCTATTTTGTTGGTTTGTGAACCTTAGTAATGGTTAATAGGAACGGTTGGGGGCATTCGTATT
MagnaDeer74B	Netherlands	Capreolus capreolus		Babesia capreoli	no ambiguous nucleotides	AAATAACAATACAGGGCAATTGTCTTGTAATTGGAATGATGGTGACCTAAACCCTCACCAGAGTAACAATTGGAGGGCAAGTCTGGTGCCAGCAGCCGCGGTAATTCCAGCTCCAATAGCGTATATTAAACTTGTTGCAGTTAAAAAGCTCGTAGTTGAATTTTTGCGTGGTGTTAATATTGACTGATGTCGAGATTGCACTTCGCTTTTGGGATTTTTCCCTTTTTACTTTGAGAAAATTAGAGTGTTTCAAGCAGACTTTTGTCTTGAATACTTCAGCATGGAATAATAGAGTAGGACTTTGGTTCTATTTTGTTGGTTTGTGAACCTTAGTAATGGTTAATAGGAACGGTTGGGGGCATTCGTATT
MagnaDeer74C	Netherlands	Capreolus capreolus		Babesia capreoli	no ambiguous nucleotides	AAATAACAATACAGGGCAATTGTCTTGTAATTGGAATGATGGTGACCTAAACCCTCACCAGAGTAACAATTGGAGGGCAAGTCTGGTGCCAGCAGCCGCGGTAATTCCAGCTCCAATAGCGTATATTAAACTTGTTGCAGTTAAAAAGCTCGTAGTTGAATTTTTGCGTGGTGTTAATATTGACTGATGTCGAGATTGCACTTCGCTTTTGGGATTTTTCCCTTTTTACTTTGAGAAAATTAGAGTGTTTCAAGCAGACTTTTGTCTTGAATACTTCAGCATGGAATAATAGAGTAGGACTTTGGTTCTATTTTGTTGGTTTGTGAACCTTAGTAATGGTTAATAGGAACGGTTGGGGGCATTCGTATT
MagnaDeer74G	Netherlands	Capreolus capreolus		Babesia capreoli	no ambiguous nucleotides	AAATAACAATACAGGGCAATTGTCTTGTAATTGGAATGATGGTGACCTAAACCCTCACCAGAGTAACAATTGGAGGGCAAGTCTGGTGCCAGCAGCCGCGGTAATTCCAGCTCCAATAGCGTATATTAAACTTGTTGCAGTTAAAAAGCTCGTAGTTGAATTTTTGCGTGGTGTTAATATTGACTGATGTCGAGATTGCACTTCGCTTTTGGGATTTTTCCCTTTTTACTTTGAGAAAATTAGAGTGTTTCAAGCAGACTTTTGTCTTGAATACTTCAGCATGGAATAATAGAGTAGGACTTTGGTTCTATTTTGTTGGTTTGTGAACCTTAGTAATGGTTAATAGGAACGGTTGGGGGCATTCGTATT
MagnaDeer74H	Netherlands	Capreolus capreolus		Babesia capreoli	no ambiguous nucleotides	AAATAACAATACAGGGCAATTGTCTTGTAATTGGAATGATGGTGACCTAAACCCTCACCAGAGTAACAATTGGAGGGCAAGTCTGGTGCCAGCAGCCGCGGTAATTCCAGCTCCAATAGCGTATATTAAACTTGTTGCAGTTAAAAAGCTCGTAGTTGAATTTTTGCGTGGTGTTAATATTGACTGATGTCGAGATTGCACTTCGCTTTTGGGATTTTTCCCTTTTTACTTTGAGAAAATTAGAGTGTTTCAAGCAGACTTTTGTCTTGAATACTTCAGCATGGAATAATAGAGTAGGACTTTGGTTCTATTTTGTTGGTTTGTGAACCTTAGTAATGGTTAATAGGAACGGTTGGGGGCATTCGTATT
MagnaDeer75C	Netherlands	Capreolus capreolus		Babesia capreoli	no ambiguous nucleotides	AAATAACAATACAGGGCAATTGTCTTGTAATTGGAATGATGGTGACCTAAACCCTCACCAGAGTAACAATTGGAGGGCAAGTCTGGTGCCAGCAGCCGCGGTAATTCCAGCTCCAATAGCGTATATTAAACTTGTTGCAGTTAAAAAGCTCGTAGTTGAATTTTTGCGTGGTGTTAATATTGACTGATGTCGAGATTGCACTTCGCTTTTGGGATTTTTCCCTTTTTACTTTGAGAAAATTAGAGTGTTTCAAGCAGACTTTTGTCTTGAATACTTCAGCATGGAATAATAGAGTAGGACTTTGGTTCTATTTTGTTGGTTTGTGAACCTTAGTAATGGTTAATAGGAACGGTTGGGGGCATTCGTATT
MagnaDeer75D	Netherlands	Capreolus capreolus		Babesia capreoli	no ambiguous nucleotides	AAATAACAATACAGGGCAATTGTCTTGTAATTGGAATGATGGTGACCTAAACCCTCACCAGAGTAACAATTGGAGGGCAAGTCTGGTGCCAGCAGCCGCGGTAATTCCAGCTCCAATAGCGTATATTAAACTTGTTGCAGTTAAAAAGCTCGTAGTTGAATTTTTGCGTGGTGTTAATATTGACTGATGTCGAGATTGCACTTCGCTTTTGGGATTTTTCCCTTTTTACTTTGAGAAAATTAGAGTGTTTCAAGCAGACTTTTGTCTTGAATACTTCAGCATGGAATAATAGAGTAGGACTTTGGTTCTATTTTGTTGGTTTGTGAACCTTAGTAATGGTTAATAGGAACGGTTGGGGGCATTCGTATT
MagnaDeer75E	Netherlands	Capreolus capreolus		Babesia capreoli	no ambiguous nucleotides	AAATAACAATACAGGGCAATTGTCTTGTAATTGGAATGATGGTGACCTAAACCCTCACCAGAGTAACAATTGGAGGGCAAGTCTGGTGCCAGCAGCCGCGGTAATTCCAGCTCCAATAGCGTATATTAAACTTGTTGCAGTTAAAAAGCTCGTAGTTGAATTTTTGCGTGGTGTTAATATTGACTGATGTCGAGATTGCACTTCGCTTTTGGGATTTTTCCCTTTTTACTTTGAGAAAATTAGAGTGTTTCAAGCAGACTTTTGTCTTGAATACTTCAGCATGGAATAATAGAGTAGGACTTTGGTTCTATTTTGTTGGTTTGTGAACCTTAGTAATGGTTAATAGGAACGGTTGGGGGCATTCGTATT
MagnaDeer75G	Netherlands	Capreolus capreolus		Babesia capreoli	no ambiguous nucleotides	AAATAACAATACAGGGCAATTGTCTTGTAATTGGAATGATGGTGACCTAAACCCTCACCAGAGTAACAATTGGAGGGCAAGTCTGGTGCCAGCAGCCGCGGTAATTCCAGCTCCAATAGCGTATATTAAACTTGTTGCAGTTAAAAAGCTCGTAGTTGAATTTTTGCGTGGTGTTAATATTGACTGATGTCGAGATTGCACTTCGCTTTTGGGATTTTTCCCTTTTTACTTTGAGAAAATTAGAGTGTTTCAAGCAGACTTTTGTCTTGAATACTTCAGCATGGAATAATAGAGTAGGACTTTGGTTCTATTTTGTTGGTTTGTGAACCTTAGTAATGGTTAATAGGAACGGTTGGGGGCATTCGTATT
MagnaDeer76C	Netherlands	Capreolus capreolus		Babesia capreoli	no ambiguous nucleotides	AAATAACAATACAGGGCAATTGTCTTGTAATTGGAATGATGGTGACCTAAACCCTCACCAGAGTAACAATTGGAGGGCAAGTCTGGTGCCAGCAGCCGCGGTAATTCCAGCTCCAATAGCGTATATTAAACTTGTTGCAGTTAAAAAGCTCGTAGTTGAATTTTTGCGTGGTGTTAATATTGACTGATGTCGAGATTGCACTTCGCTTTTGGGATTTTTCCCTTTTTACTTTGAGAAAATTAGAGTGTTTCAAGCAGACTTTTGTCTTGAATACTTCAGCATGGAATAATAGAGTAGGACTTTGGTTCTATTTTGTTGGTTTGTGAACCTTAGTAATGGTTAATAGGAACGGTTGGGGGCATTCGTATT
MagnaDeer76F	Netherlands	Capreolus capreolus		Babesia capreoli	no ambiguous nucleotides	AAATAACAATACAGGGCAATTGTCTTGTAATTGGAATGATGGTGACCTAAACCCTCACCAGAGTAACAATTGGAGGGCAAGTCTGGTGCCAGCAGCCGCGGTAATTCCAGCTCCAATAGCGTATATTAAACTTGTTGCAGTTAAAAAGCTCGTAGTTGAATTTTTGCGTGGTGTTAATATTGACTGATGTCGAGATTGCACTTCGCTTTTGGGATTTTTCCCTTTTTACTTTGAGAAAATTAGAGTGTTTCAAGCAGACTTTTGTCTTGAATACTTCAGCATGGAATAATAGAGTAGGACTTTGGTTCTATTTTGTTGGTTTGTGAACCTTAGTAATGGTTAATAGGAACGGTTGGGGGCATTCGTATT
MagnaDeer76G	Netherlands	Capreolus capreolus		Babesia capreoli		AAATAACAATACAGGGCAATTGTCTTGTAATTGGAATGATGGTGACCTAAACCCTCACCAGAGTAACAATTGGAGGGCAAGTCTGGTGCCAGCAGCCGCGGTAATTCCAGCTCCAATAGCGTATATTAAACTTGTTGCAGTTAAAAAGCTCGTAGTTGAATTTTTGCGTGGTGTTAATATTGACTGATGTCGAGATTGCACTTCGCTTTTGGGATTTTTCCCTTTTTACTTTGAGAAAATTAGAGTGTTTCAAGCAGACTTTTGTCTTGAATACTTCAGCATGGAATAATAGAGTAGGACTTTGGTTCTATTTTGTTGGTTTGTGAACCTTAGTAATGGTTAATAGGAACGGTTGGGGGCATTCGTATT
MagnaDeer7A	Netherlands	Capreolus capreolus		Babesia capreoli	no ambiguous nucleotides	AAATAACAATACAGGGCAATTGTCTTGTAATTGGAATGATGGTGACCTAAACCCTCACCAGAGTAACAATTGGAGGGCAAGTCTGGTGCCAGCAGCCGCGGTAATTCCAGCTCCAATAGCGTATATTAAACTTGTTGCAGTTAAAAAGCTCGTAGTTGAATTTTTGCGTGGTGTTAATATTGACTGATGTCGAGATTGCACTTCGCTTTTGGGATTTTTCCCTTTTTACTTTGAGAAAATTAGAGTGTTTCAAGCAGACTTTTGTCTTGAATACTTCAGCATGGAATAATAGAGTAGGACTTTGGTTCTATTTTGTTGGTTTGTGAACCTTAGTAATGGTTAATAGGAACGGTTGGGGGCATTCGTATT
MagnaDeer7B	Netherlands	Capreolus capreolus		Babesia capreoli	no ambiguous nucleotides	AAATAACAATACAGGGCAATTGTCTTGTAATTGGAATGATGGTGACCTAAACCCTCACCAGAGTAACAATTGGAGGGCAAGTCTGGTGCCAGCAGCCGCGGTAATTCCAGCTCCAATAGCGTATATTAAACTTGTTGCAGTTAAAAAGCTCGTAGTTGAATTTTTGCGTGGTGTTAATATTGACTGATGTCGAGATTGCACTTCGCTTTTGGGATTTTTCCCTTTTTACTTTGAGAAAATTAGAGTGTTTCAAGCAGACTTTTGTCTTGAATACTTCAGCATGGAATAATAGAGTAGGACTTTGGTTCTATTTTGTTGGTTTGTGAACCTTAGTAATGGTTAATAGGAACGGTTGGGGGCATTCGTATT
MagnaDeer7F	Netherlands	Capreolus capreolus		Babesia capreoli	no ambiguous nucleotides	AAATAACAATACAGGGCAATTGTCTTGTAATTGGAATGATGGTGACCTAAACCCTCACCAGAGTAACAATTGGAGGGCAAGTCTGGTGCCAGCAGCCGCGGTAATTCCAGCTCCAATAGCGTATATTAAACTTGTTGCAGTTAAAAAGCTCGTAGTTGAATTTTTGCGTGGTGTTAATATTGACTGATGTCGAGATTGCACTTCGCTTTTGGGATTTTTCCCTTTTTACTTTGAGAAAATTAGAGTGTTTCAAGCAGACTTTTGTCTTGAATACTTCAGCATGGAATAATAGAGTAGGACTTTGGTTCTATTTTGTTGGTTTGTGAACCTTAGTAATGGTTAATAGGAACGGTTGGGGGCATTCGTATT
MagnaDeer7G	Netherlands	Capreolus capreolus		Babesia capreoli	no ambiguous nucleotides	AAATAACAATACAGGGCAATTGTCTTGTAATTGGAATGATGGTGACCTAAACCCTCACCAGAGTAACAATTGGAGGGCAAGTCTGGTGCCAGCAGCCGCGGTAATTCCAGCTCCAATAGCGTATATTAAACTTGTTGCAGTTAAAAAGCTCGTAGTTGAATTTTTGCGTGGTGTTAATATTGACTGATGTCGAGATTGCACTTCGCTTTTGGGATTTTTCCCTTTTTACTTTGAGAAAATTAGAGTGTTTCAAGCAGACTTTTGTCTTGAATACTTCAGCATGGAATAATAGAGTAGGACTTTGGTTCTATTTTGTTGGTTTGTGAACCTTAGTAATGGTTAATAGGAACGGTTGGGGGCATTCGTATT
MagnaDeer8D	Netherlands	Capreolus capreolus		Babesia capreoli	no ambiguous nucleotides	AAATAACAATACAGGGCAATTGTCTTGTAATTGGAATGATGGTGACCTAAACCCTCACCAGAGTAACAATTGGAGGGCAAGTCTGGTGCCAGCAGCCGCGGTAATTCCAGCTCCAATAGCGTATATTAAACTTGTTGCAGTTAAAAAGCTCGTAGTTGAATTTTTGCGTGGTGTTAATATTGACTGATGTCGAGATTGCACTTCGCTTTTGGGATTTTTCCCTTTTTACTTTGAGAAAATTAGAGTGTTTCAAGCAGACTTTTGTCTTGAATACTTCAGCATGGAATAATAGAGTAGGACTTTGGTTCTATTTTGTTGGTTTGTGAACCTTAGTAATGGTTAATAGGAACGGTTGGGGGCATTCGTATT
MagnaDeer8E	Netherlands	Capreolus capreolus		Babesia capreoli	no ambiguous nucleotides	AAATAACAATACAGGGCAATTGTCTTGTAATTGGAATGATGGTGACCTAAACCCTCACCAGAGTAACAATTGGAGGGCAAGTCTGGTGCCAGCAGCCGCGGTAATTCCAGCTCCAATAGCGTATATTAAACTTGTTGCAGTTAAAAAGCTCGTAGTTGAATTTTTGCGTGGTGTTAATATTGACTGATGTCGAGATTGCACTTCGCTTTTGGGATTTTTCCCTTTTTACTTTGAGAAAATTAGAGTGTTTCAAGCAGACTTTTGTCTTGAATACTTCAGCATGGAATAATAGAGTAGGACTTTGGTTCTATTTTGTTGGTTTGTGAACCTTAGTAATGGTTAATAGGAACGGTTGGGGGCATTCGTATT
MagnaDeer8F	Netherlands	Capreolus capreolus		Babesia capreoli	no ambiguous nucleotides	AAATAACAATACAGGGCAATTGTCTTGTAATTGGAATGATGGTGACCTAAACCCTCACCAGAGTAACAATTGGAGGGCAAGTCTGGTGCCAGCAGCCGCGGTAATTCCAGCTCCAATAGCGTATATTAAACTTGTTGCAGTTAAAAAGCTCGTAGTTGAATTTTTGCGTGGTGTTAATATTGACTGATGTCGAGATTGCACTTCGCTTTTGGGATTTTTCCCTTTTTACTTTGAGAAAATTAGAGTGTTTCAAGCAGACTTTTGTCTTGAATACTTCAGCATGGAATAATAGAGTAGGACTTTGGTTCTATTTTGTTGGTTTGTGAACCTTAGTAATGGTTAATAGGAACGGTTGGGGGCATTCGTATT
MagnaDeer8G	Netherlands	Capreolus capreolus		Babesia capreoli	no ambiguous nucleotides	AAATAACAATACAGGGCAATTGTCTTGTAATTGGAATGATGGTGACCTAAACCCTCACCAGAGTAACAATTGGAGGGCAAGTCTGGTGCCAGCAGCCGCGGTAATTCCAGCTCCAATAGCGTATATTAAACTTGTTGCAGTTAAAAAGCTCGTAGTTGAATTTTTGCGTGGTGTTAATATTGACTGATGTCGAGATTGCACTTCGCTTTTGGGATTTTTCCCTTTTTACTTTGAGAAAATTAGAGTGTTTCAAGCAGACTTTTGTCTTGAATACTTCAGCATGGAATAATAGAGTAGGACTTTGGTTCTATTTTGTTGGTTTGTGAACCTTAGTAATGGTTAATAGGAACGGTTGGGGGCATTCGTATT
MagnaDeer8H	Netherlands	Capreolus capreolus		Babesia capreoli	no ambiguous nucleotides	AAATAACAATACAGGGCAATTGTCTTGTAATTGGAATGATGGTGACCTAAACCCTCACCAGAGTAACAATTGGAGGGCAAGTCTGGTGCCAGCAGCCGCGGTAATTCCAGCTCCAATAGCGTATATTAAACTTGTTGCAGTTAAAAAGCTCGTAGTTGAATTTTTGCGTGGTGTTAATATTGACTGATGTCGAGATTGCACTTCGCTTTTGGGATTTTTCCCTTTTTACTTTGAGAAAATTAGAGTGTTTCAAGCAGACTTTTGTCTTGAATACTTCAGCATGGAATAATAGAGTAGGACTTTGGTTCTATTTTGTTGGTTTGTGAACCTTAGTAATGGTTAATAGGAACGGTTGGGGGCATTCGTATT
MagnaDeer9A	Netherlands	Capreolus capreolus		Babesia capreoli	no ambiguous nucleotides	AAATAACAATACAGGGCAATTGTCTTGTAATTGGAATGATGGTGACCTAAACCCTCACCAGAGTAACAATTGGAGGGCAAGTCTGGTGCCAGCAGCCGCGGTAATTCCAGCTCCAATAGCGTATATTAAACTTGTTGCAGTTAAAAAGCTCGTAGTTGAATTTTTGCGTGGTGTTAATATTGACTGATGTCGAGATTGCACTTCGCTTTTGGGATTTTTCCCTTTTTACTTTGAGAAAATTAGAGTGTTTCAAGCAGACTTTTGTCTTGAATACTTCAGCATGGAATAATAGAGTAGGACTTTGGTTCTATTTTGTTGGTTTGTGAACCTTAGTAATGGTTAATAGGAACGGTTGGGGGCATTCGTATT
MagnaDeer9C	Netherlands	Capreolus capreolus		Babesia capreoli	no ambiguous nucleotides	AAATAACAATACAGGGCAATTGTCTTGTAATTGGAATGATGGTGACCTAAACCCTCACCAGAGTAACAATTGGAGGGCAAGTCTGGTGCCAGCAGCCGCGGTAATTCCAGCTCCAATAGCGTATATTAAACTTGTTGCAGTTAAAAAGCTCGTAGTTGAATTTTTGCGTGGTGTTAATATTGACTGATGTCGAGATTGCACTTCGCTTTTGGGATTTTTCCCTTTTTACTTTGAGAAAATTAGAGTGTTTCAAGCAGACTTTTGTCTTGAATACTTCAGCATGGAATAATAGAGTAGGACTTTGGTTCTATTTTGTTGGTTTGTGAACCTTAGTAATGGTTAATAGGAACGGTTGGGGGCATTCGTATT
MagnaDeer9E	Netherlands	Capreolus capreolus		Babesia capreoli	no ambiguous nucleotides	AAATAACAATACAGGGCAATTGTCTTGTAATTGGAATGATGGTGACCTAAACCCTCACCAGAGTAACAATTGGAGGGCAAGTCTGGTGCCAGCAGCCGCGGTAATTCCAGCTCCAATAGCGTATATTAAACTTGTTGCAGTTAAAAAGCTCGTAGTTGAATTTTTGCGTGGTGTTAATATTGACTGATGTCGAGATTGCACTTCGCTTTTGGGATTTTTCCCTTTTTACTTTGAGAAAATTAGAGTGTTTCAAGCAGACTTTTGTCTTGAATACTTCAGCATGGAATAATAGAGTAGGACTTTGGTTCTATTTTGTTGGTTTGTGAACCTTAGTAATGGTTAATAGGAACGGTTGGGGGCATTCGTATT
MagnaDeer1A	Netherlands	Capreolus capreolus		Babesia capreoli		AAATAACAATACAGGGCAATTGTCTTGTAATTGGAATGATGGTGACCTAAACCCTCACCAGAGTAACAATTGGAGGGCAAGTCTGGTGCCAGCAGCCGCGGTAATTCCAGCTCCAATAGCGTATATTAAACTTGTTGCAGTTAAAAAGCTCGTAGTTGAATTTTTGCGTGGTGTTAATATTGACTGATGTCGAGATTGCACTTCGCTTTTGGGATTTTTCCCTTTTTACTTTGAGAAAATTAGAGTGTTTCAAGCAGACTTTTGTCTTGAATACTTCAGCATGGAATAATAGAGTAGGACTTTGGTTCTATTTTGTTGGTTTGTGAACCTTAGTAATGGTTAATAGGAACGGTTGGGGGCATTCGTAT
B1 S17 63	Netherlands	Capreolus capreolus	2014	Babesia capreoli	no ambiguous nucleotides	AAATAACAATACAGGGCAATTGTCTTGTAATTGGAATGATGGTGACCTAAACCCTCACCAGAGTAACAATTGGAGGGCAAGTCTGGTGCCAGCAGCCGCGGTAATTCCAGCTCCAATAGCGTATATTAAACTTGTTGCAGTTAAAAAGCTCGTAGTTGAATTTTTGCGTGGTGTTAATATTGACTGATGTCGAGATTGCACTTCGCTTTTGGGATTTTTCCCTTTTTACTTTGAGAAAATTAGAGTGTTTCAAGCAGACTTTTGTCTTGAATACTTCAGCATGGAATAATAGAGTAGGACTTTGGTTCTATTTTGTTGGTTTGTGAACCTTAGTAATGGTTAATAGGAACGGTTGGGG
B2 S6 62	Netherlands	Capreolus capreolus	2014	Babesia capreoli	no ambiguous nucleotides	AAATAACAATACAGGGCAATTGTCTTGTAATTGGAATGATGGTGACCTAAACCCTCACCAGAGTAACAATTGGAGGGCAAGTCTGGTGCCAGCAGCCGCGGTAATTCCAGCTCCAATAGCGTATATTAAACTTGTTGCAGTTAAAAAGCTCGTAGTTGAATTTTTGCGTGGTGTTAATATTGACTGATGTCGAGATTGCACTTCGCTTTTGGGATTTTTCCCTTTTTACTTTGAGAAAATTAGAGTGTTTCAAGCAGACTTTTGTCTTGAATACTTCAGCATGGAATAATAGAGTAGGACTTTGGTTCTATTTTGTTGGTTTGTGAACCTTAGTAATGGTTAATAGGAACGGTTGGGG
B2 S18 80	Netherlands	Capreolus capreolus	2014	Babesia capreoli	no ambiguous nucleotides	AAATAACAATACAGGGCAATTGTCTTGTAATTGGAATGATGGTGACCTAAACCCTCACCAGAGTAACAATTGGAGGGCAAGTCTGGTGCCAGCAGCCGCGGTAATTCCAGCTCCAATAGCGTATATTAAACTTGTTGCAGTTAAAAAGCTCGTAGTTGAATTTTTGCGTGGTGTTAATATTGACTGATGTCGAGATTGCACTTCGCTTTTGGGATTTTTCCCTTTTTACTTTGAGAAAATTAGAGTGTTTCAAGCAGACTTTTGTCTTGAATACTTCAGCATGGAATAATAGAGTAGGACTTTGGTTCTATTTTGTTGGTTTGTGAACCTTAGTAATGGTTAATAGGAACGGTTGGG
MagnaDeer25D	Netherlands	Capreolus capreolus		Babesia capreoli	no ambiguous nucleotides	TGTCTTGTAATTGGAATGATGGTGACCTAAACCCTCACCAGAGTAACAATTGGAGGGCAAGTCTGGTGCCAGCAGCCGCGGTAATTCCAGCTCCAATAGCGTATATTAAACTTGTTGCAGTTAAAAAGCTCGTAGTTGAATTTTTGCGTGGTGTTAATATTGACTGATGTCGAGATTGCACTTCGCTTTTGGGATTTTTCCCTTTTTACTTTGAGAAAATTAGAGTGTTTCAAGCAGACTTTTGTCTTGAATACTTCAGCATGGAATAATAGAGTAGGACTTTGGTTCTATTTTGTTGGTTTGTGAACCTTAGTAATGGTTAATAGGAACGGTTGGGGGCATTCGTATT
MagnaDeer40B	Netherlands	Capreolus capreolus		Babesia capreoli	no ambiguous nucleotides	TGTCTTGTAATTGGAATGATGGTGACCTAAACCCTCACCAGAGTAACAATTGGAGGGCAAGTCTGGTGCCAGCAGCCGCGGTAATTCCAGCTCCAATAGCGTATATTAAACTTGTTGCAGTTAAAAAGCTCGTAGTTGAATTTTTGCGTGGTGTTAATATTGACTGATGTCGAGATTGCACTTCGCTTTTGGGATTTTTCCCTTTTTACTTTGAGAAAATTAGAGTGTTTCAAGCAGACTTTTGTCTTGAATACTTCAGCATGGAATAATAGAGTAGGACTTTGGTTCTATTTTGTTGGTTTGTGAACCTTAGTAATGGTTAATAGGAACGGTTGGGGGCATTCGTATT
MagnaDeer43C	Netherlands	Capreolus capreolus		Babesia capreoli	no ambiguous nucleotides	TGTCTTGTAATTGGAATGATGGTGACCTAAACCCTCACCAGAGTAACAATTGGAGGGCAAGTCTGGTGCCAGCAGCCGCGGTAATTCCAGCTCCAATAGCGTATATTAAACTTGTTGCAGTTAAAAAGCTCGTAGTTGAATTTTTGCGTGGTGTTAATATTGACTGATGTCGAGATTGCACTTCGCTTTTGGGATTTTTCCCTTTTTACTTTGAGAAAATTAGAGTGTTTCAAGCAGACTTTTGTCTTGAATACTTCAGCATGGAATAATAGAGTAGGACTTTGGTTCTATTTTGTTGGTTTGTGAACCTTAGTAATGGTTAATAGGAACGGTTGGGGGCATTCGTATT
MagnaDeer43H	Netherlands	Capreolus capreolus		Babesia capreoli	no ambiguous nucleotides	TGTCTTGTAATTGGAATGATGGTGACCTAAACCCTCACCAGAGTAACAATTGGAGGGCAAGTCTGGTGCCAGCAGCCGCGGTAATTCCAGCTCCAATAGCGTATATTAAACTTGTTGCAGTTAAAAAGCTCGTAGTTGAATTTTTGCGTGGTGTTAATATTGACTGATGTCGAGATTGCACTTCGCTTTTGGGATTTTTCCCTTTTTACTTTGAGAAAATTAGAGTGTTTCAAGCAGACTTTTGTCTTGAATACTTCAGCATGGAATAATAGAGTAGGACTTTGGTTCTATTTTGTTGGTTTGTGAACCTTAGTAATGGTTAATAGGAACGGTTGGGGGCATTCGTATT
MagnaDeer55C	Netherlands	Capreolus capreolus		Babesia capreoli	no ambiguous nucleotides	TGTCTTGTAATTGGAATGATGGTGACCTAAACCCTCACCAGAGTAACAATTGGAGGGCAAGTCTGGTGCCAGCAGCCGCGGTAATTCCAGCTCCAATAGCGTATATTAAACTTGTTGCAGTTAAAAAGCTCGTAGTTGAATTTTTGCGTGGTGTTAATATTGACTGATGTCGAGATTGCACTTCGCTTTTGGGATTTTTCCCTTTTTACTTTGAGAAAATTAGAGTGTTTCAAGCAGACTTTTGTCTTGAATACTTCAGCATGGAATAATAGAGTAGGACTTTGGTTCTATTTTGTTGGTTTGTGAACCTTAGTAATGGTTAATAGGAACGGTTGGGGGCATTCGTATT
MagnaDeer20G	Netherlands	Capreolus capreolus		Babesia capreoli	no ambiguous nucleotides	TTGTCTTGTAATTGGAATGATGGTGACCTAAACCCTCACCAGAGTAACAATTGGAGGGCAAGTCTGGTGCCAGCAGCCGCGGTAATTCCAGCTCCAATAGCGTATATTAAACTTGTTGCAGTTAAAAAGCTCGTAGTTGAATTTTTGCGTGGTGTTAATATTGACTGATGTCGAGATTGCACTTCGCTTTTGGGATTTTTCCCTTTTTACTTTGAGAAAATTAGAGTGTTTCAAGCAGACTTTTGTCTTGAATACTTCAGCATGGAATAATAGAGTAGGACTTTGGTTCTATTTTGTTGGTTTGTGAACCTTAGTAATGGTTAATAGGAACGGTTGGGGGCATTCGTATT
MagnaDeer21B	Netherlands	Capreolus capreolus		Babesia capreoli	no ambiguous nucleotides	TTGTCTTGTAATTGGAATGATGGTGACCTAAACCCTCACCAGAGTAACAATTGGAGGGCAAGTCTGGTGCCAGCAGCCGCGGTAATTCCAGCTCCAATAGCGTATATTAAACTTGTTGCAGTTAAAAAGCTCGTAGTTGAATTTTTGCGTGGTGTTAATATTGACTGATGTCGAGATTGCACTTCGCTTTTGGGATTTTTCCCTTTTTACTTTGAGAAAATTAGAGTGTTTCAAGCAGACTTTTGTCTTGAATACTTCAGCATGGAATAATAGAGTAGGACTTTGGTTCTATTTTGTTGGTTTGTGAACCTTAGTAATGGTTAATAGGAACGGTTGGGGGCATTCGTATT
MagnaDeer21G	Netherlands	Capreolus capreolus		Babesia capreoli	no ambiguous nucleotides	TTGTCTTGTAATTGGAATGATGGTGACCTAAACCCTCACCAGAGTAACAATTGGAGGGCAAGTCTGGTGCCAGCAGCCGCGGTAATTCCAGCTCCAATAGCGTATATTAAACTTGTTGCAGTTAAAAAGCTCGTAGTTGAATTTTTGCGTGGTGTTAATATTGACTGATGTCGAGATTGCACTTCGCTTTTGGGATTTTTCCCTTTTTACTTTGAGAAAATTAGAGTGTTTCAAGCAGACTTTTGTCTTGAATACTTCAGCATGGAATAATAGAGTAGGACTTTGGTTCTATTTTGTTGGTTTGTGAACCTTAGTAATGGTTAATAGGAACGGTTGGGGGCATTCGTATT
MagnaDeer26A	Netherlands	Capreolus capreolus		Babesia capreoli	no ambiguous nucleotides	TTGTCTTGTAATTGGAATGATGGTGACCTAAACCCTCACCAGAGTAACAATTGGAGGGCAAGTCTGGTGCCAGCAGCCGCGGTAATTCCAGCTCCAATAGCGTATATTAAACTTGTTGCAGTTAAAAAGCTCGTAGTTGAATTTTTGCGTGGTGTTAATATTGACTGATGTCGAGATTGCACTTCGCTTTTGGGATTTTTCCCTTTTTACTTTGAGAAAATTAGAGTGTTTCAAGCAGACTTTTGTCTTGAATACTTCAGCATGGAATAATAGAGTAGGACTTTGGTTCTATTTTGTTGGTTTGTGAACCTTAGTAATGGTTAATAGGAACGGTTGGGGGCATTCGTATT
MagnaDeer26C	Netherlands	Capreolus capreolus		Babesia capreoli	no ambiguous nucleotides	TTGTCTTGTAATTGGAATGATGGTGACCTAAACCCTCACCAGAGTAACAATTGGAGGGCAAGTCTGGTGCCAGCAGCCGCGGTAATTCCAGCTCCAATAGCGTATATTAAACTTGTTGCAGTTAAAAAGCTCGTAGTTGAATTTTTGCGTGGTGTTAATATTGACTGATGTCGAGATTGCACTTCGCTTTTGGGATTTTTCCCTTTTTACTTTGAGAAAATTAGAGTGTTTCAAGCAGACTTTTGTCTTGAATACTTCAGCATGGAATAATAGAGTAGGACTTTGGTTCTATTTTGTTGGTTTGTGAACCTTAGTAATGGTTAATAGGAACGGTTGGGGGCATTCGTATT
MagnaDeer26H	Netherlands	Capreolus capreolus		Babesia capreoli	no ambiguous nucleotides	TTGTCTTGTAATTGGAATGATGGTGACCTAAACCCTCACCAGAGTAACAATTGGAGGGCAAGTCTGGTGCCAGCAGCCGCGGTAATTCCAGCTCCAATAGCGTATATTAAACTTGTTGCAGTTAAAAAGCTCGTAGTTGAATTTTTGCGTGGTGTTAATATTGACTGATGTCGAGATTGCACTTCGCTTTTGGGATTTTTCCCTTTTTACTTTGAGAAAATTAGAGTGTTTCAAGCAGACTTTTGTCTTGAATACTTCAGCATGGAATAATAGAGTAGGACTTTGGTTCTATTTTGTTGGTTTGTGAACCTTAGTAATGGTTAATAGGAACGGTTGGGGGCATTCGTATT
MagnaDeer27E	Netherlands	Capreolus capreolus		Babesia capreoli	no ambiguous nucleotides	TTGTCTTGTAATTGGAATGATGGTGACCTAAACCCTCACCAGAGTAACAATTGGAGGGCAAGTCTGGTGCCAGCAGCCGCGGTAATTCCAGCTCCAATAGCGTATATTAAACTTGTTGCAGTTAAAAAGCTCGTAGTTGAATTTTTGCGTGGTGTTAATATTGACTGATGTCGAGATTGCACTTCGCTTTTGGGATTTTTCCCTTTTTACTTTGAGAAAATTAGAGTGTTTCAAGCAGACTTTTGTCTTGAATACTTCAGCATGGAATAATAGAGTAGGACTTTGGTTCTATTTTGTTGGTTTGTGAACCTTAGTAATGGTTAATAGGAACGGTTGGGGGCATTCGTATT
MagnaDeer27F	Netherlands	Capreolus capreolus		Babesia capreoli	no ambiguous nucleotides	TTGTCTTGTAATTGGAATGATGGTGACCTAAACCCTCACCAGAGTAACAATTGGAGGGCAAGTCTGGTGCCAGCAGCCGCGGTAATTCCAGCTCCAATAGCGTATATTAAACTTGTTGCAGTTAAAAAGCTCGTAGTTGAATTTTTGCGTGGTGTTAATATTGACTGATGTCGAGATTGCACTTCGCTTTTGGGATTTTTCCCTTTTTACTTTGAGAAAATTAGAGTGTTTCAAGCAGACTTTTGTCTTGAATACTTCAGCATGGAATAATAGAGTAGGACTTTGGTTCTATTTTGTTGGTTTGTGAACCTTAGTAATGGTTAATAGGAACGGTTGGGGGCATTCGTATT
MagnaDeer30B	Netherlands	Capreolus capreolus		Babesia capreoli	no ambiguous nucleotides	TTGTCTTGTAATTGGAATGATGGTGACCTAAACCCTCACCAGAGTAACAATTGGAGGGCAAGTCTGGTGCCAGCAGCCGCGGTAATTCCAGCTCCAATAGCGTATATTAAACTTGTTGCAGTTAAAAAGCTCGTAGTTGAATTTTTGCGTGGTGTTAATATTGACTGATGTCGAGATTGCACTTCGCTTTTGGGATTTTTCCCTTTTTACTTTGAGAAAATTAGAGTGTTTCAAGCAGACTTTTGTCTTGAATACTTCAGCATGGAATAATAGAGTAGGACTTTGGTTCTATTTTGTTGGTTTGTGAACCTTAGTAATGGTTAATAGGAACGGTTGGGGGCATTCGTATT
MagnaDeer30D	Netherlands	Capreolus capreolus		Babesia capreoli	no ambiguous nucleotides	TTGTCTTGTAATTGGAATGATGGTGACCTAAACCCTCACCAGAGTAACAATTGGAGGGCAAGTCTGGTGCCAGCAGCCGCGGTAATTCCAGCTCCAATAGCGTATATTAAACTTGTTGCAGTTAAAAAGCTCGTAGTTGAATTTTTGCGTGGTGTTAATATTGACTGATGTCGAGATTGCACTTCGCTTTTGGGATTTTTCCCTTTTTACTTTGAGAAAATTAGAGTGTTTCAAGCAGACTTTTGTCTTGAATACTTCAGCATGGAATAATAGAGTAGGACTTTGGTTCTATTTTGTTGGTTTGTGAACCTTAGTAATGGTTAATAGGAACGGTTGGGGGCATTCGTATT
MagnaDeer32F	Netherlands	Capreolus capreolus		Babesia capreoli	no ambiguous nucleotides	TTGTCTTGTAATTGGAATGATGGTGACCTAAACCCTCACCAGAGTAACAATTGGAGGGCAAGTCTGGTGCCAGCAGCCGCGGTAATTCCAGCTCCAATAGCGTATATTAAACTTGTTGCAGTTAAAAAGCTCGTAGTTGAATTTTTGCGTGGTGTTAATATTGACTGATGTCGAGATTGCACTTCGCTTTTGGGATTTTTCCCTTTTTACTTTGAGAAAATTAGAGTGTTTCAAGCAGACTTTTGTCTTGAATACTTCAGCATGGAATAATAGAGTAGGACTTTGGTTCTATTTTGTTGGTTTGTGAACCTTAGTAATGGTTAATAGGAACGGTTGGGGGCATTCGTATT
MagnaDeer34E	Netherlands	Capreolus capreolus		Babesia capreoli	no ambiguous nucleotides	TTGTCTTGTAATTGGAATGATGGTGACCTAAACCCTCACCAGAGTAACAATTGGAGGGCAAGTCTGGTGCCAGCAGCCGCGGTAATTCCAGCTCCAATAGCGTATATTAAACTTGTTGCAGTTAAAAAGCTCGTAGTTGAATTTTTGCGTGGTGTTAATATTGACTGATGTCGAGATTGCACTTCGCTTTTGGGATTTTTCCCTTTTTACTTTGAGAAAATTAGAGTGTTTCAAGCAGACTTTTGTCTTGAATACTTCAGCATGGAATAATAGAGTAGGACTTTGGTTCTATTTTGTTGGTTTGTGAACCTTAGTAATGGTTAATAGGAACGGTTGGGGGCATTCGTATT
MagnaDeer34G	Netherlands	Capreolus capreolus		Babesia capreoli	no ambiguous nucleotides	TTGTCTTGTAATTGGAATGATGGTGACCTAAACCCTCACCAGAGTAACAATTGGAGGGCAAGTCTGGTGCCAGCAGCCGCGGTAATTCCAGCTCCAATAGCGTATATTAAACTTGTTGCAGTTAAAAAGCTCGTAGTTGAATTTTTGCGTGGTGTTAATATTGACTGATGTCGAGATTGCACTTCGCTTTTGGGATTTTTCCCTTTTTACTTTGAGAAAATTAGAGTGTTTCAAGCAGACTTTTGTCTTGAATACTTCAGCATGGAATAATAGAGTAGGACTTTGGTTCTATTTTGTTGGTTTGTGAACCTTAGTAATGGTTAATAGGAACGGTTGGGGGCATTCGTATT
MagnaDeer36D	Netherlands	Capreolus capreolus		Babesia capreoli	no ambiguous nucleotides	TTGTCTTGTAATTGGAATGATGGTGACCTAAACCCTCACCAGAGTAACAATTGGAGGGCAAGTCTGGTGCCAGCAGCCGCGGTAATTCCAGCTCCAATAGCGTATATTAAACTTGTTGCAGTTAAAAAGCTCGTAGTTGAATTTTTGCGTGGTGTTAATATTGACTGATGTCGAGATTGCACTTCGCTTTTGGGATTTTTCCCTTTTTACTTTGAGAAAATTAGAGTGTTTCAAGCAGACTTTTGTCTTGAATACTTCAGCATGGAATAATAGAGTAGGACTTTGGTTCTATTTTGTTGGTTTGTGAACCTTAGTAATGGTTAATAGGAACGGTTGGGGGCATTCGTATT
MagnaDeer36E	Netherlands	Capreolus capreolus		Babesia capreoli	no ambiguous nucleotides	TTGTCTTGTAATTGGAATGATGGTGACCTAAACCCTCACCAGAGTAACAATTGGAGGGCAAGTCTGGTGCCAGCAGCCGCGGTAATTCCAGCTCCAATAGCGTATATTAAACTTGTTGCAGTTAAAAAGCTCGTAGTTGAATTTTTGCGTGGTGTTAATATTGACTGATGTCGAGATTGCACTTCGCTTTTGGGATTTTTCCCTTTTTACTTTGAGAAAATTAGAGTGTTTCAAGCAGACTTTTGTCTTGAATACTTCAGCATGGAATAATAGAGTAGGACTTTGGTTCTATTTTGTTGGTTTGTGAACCTTAGTAATGGTTAATAGGAACGGTTGGGGGCATTCGTATT
MagnaDeer33A	Netherlands	Capreolus capreolus		Babesia capreoli	ambiguous nucleotides	AAATAWCAATACAGGGCAATTGTCTTGTAATTGGAATGATGGTGACCTAAACCCTCACCAGAGTAACAATTGGAGGGCAAGTCTGGTGCCAGCAGCCGCGGTAATTCCAGCTCCAATAGCGTATATTAAACTTGTTGCAGTTAAAAAGCTCGTAGTTGAATTTTTGCGTGGTGTTAATATTGACTGATGTCGAGATTGCACTTCGCTTTTGGGATTTTTCCCTTTTTACTTTGAGAAAATTAGAGTGTTTCAAGCAGACTTTTGTCTTGAATACTTCAGCATGGAATAATAGAGTAGGACTTTGGTTCTATTTTGTTGGTTTGTGAACCTTAGTAATGGTTAATAGGAACGGTTGGGGGCATTCGTATT
MagnaDeer76A	Netherlands	Capreolus capreolus		Babesia capreoli	ambiguous nucleotides	AAATAWCAATACAGGGCAATTGTCTTGTAATTGGAATGATGGTGACCTAAACCCTCACCAGAGTAACAATTGGAGGGCAAGTCTGGTGCCAGCAGCCGCGGTAATTCCAGCTCCAATAGCGTATATTAAACTTGTTGCAGTTAAAAAGCTCGTAGTTGAATTTTTGCGTGGTGTTAATATTGACTGATGTCGAGATTGCACTTCGCTTTTGGGATTTTTCCCTTTTTACTTTGAGAAAATTAGAGTGTTTCAAGCAGACTTTTGTCTTGAATACTTCAGCATGGAATAATAGAGTAGGACTTTGGTTCTATTTTGTTGGTTTGTGAACCTTAGTAATGGTTAATAGGAACGGTTGGGGGCATTCGTATT
MagnaDeer9D	Netherlands	Capreolus capreolus		Babesia capreoli	ambiguous nucleotides	AAATAWCAATACAGGGCAATTGTCTTGTAATTGGAATGATGGTGACCTAAACCCTCACCAGAGTAACAATTGGAGGGCAAGTCTGGTGCCAGCAGCCGCGGTAATTCCAGCTCCAATAGCGTATATTAAACTTGTTGCAGTTAAAAAGCTCGTAGTTGAATTTTTGCGTGGTGTTAATATTGACTGATGTCGAGATTGCACTTCGCTTTTGGGATTTTTCCCTTTTTACTTTGAGAAAATTAGAGTGTTTCAAGCAGACTTTTGTCTTGAATACTTCAGCATGGAATAATAGAGTAGGACTTTGGTTCTATTTTGTTGGTTTGTGAACCTTAGTAATGGTTAATAGGAACGGTTGGGGGCATTCGTATT
MagnaDeer9G	Netherlands	Capreolus capreolus		Babesia capreoli	ambiguous nucleotides	AAATAACAATMCAGGGCAATTGTCTTGTAATTGGAATGATGGTGACCTAAACCCTCACCAGAGTAACAATTGGAGGGCAAGTCTGGTGCCAGCAGCCGCGGTAATTCCAGCTCCAATAGCGTATATTAAACTTGTTGCAGTTAAAAAGCTCGTAGTTGAATTTTTGCGTGGTGTTAATATTGACTGATGTCGAGATTGCACTTCGCTTTTGGGATTTTTCCCTTTTTACTTTGAGAAAATTAGAGTGTTTCAAGCAGACTTTTGTCTTGAATACTTCAGCATGGAATAATAGAGTAGGACTTTGGTTCTATTTTGTTGGTTTGTGAACCTTAGTAATGGTTAATAGGAACGGTTGGGGGCATTCGTATT
MagnaDeer39F	Netherlands	Capreolus capreolus		Babesia capreoli	no ambiguous nucleotides	TTGTCTTGTAATTGGAATGATGGTGACCTAAACCCTCACCAGAGTAACAATTGGAGGGCAAGTCTGGTGCCAGCAGCCGCGGTAATTCCAGCTCCAATAGCGTATATTAAACTTGTTGCAGTTAAAAAGCTCGTAGTTGAATTTTTGCGTGGTGTTAATATTGACTGATGTCGAGATTGCACTTCGCTTTTGGGATTTTTCCCTTTTTACTTTGAGAAAATTAGAGTGTTTCAAGCAGACTTTTGTCTTGAATACTTCAGCATGGAATAATAGAGTAGGACTTTGGTTCTATTTTGTTGGTTTGTGAACCTTAGTAATGGTTAATAGGAACGGTTGGGGGCATTCGTATT
MagnaDeer40A	Netherlands	Capreolus capreolus		Babesia capreoli	no ambiguous nucleotides	TTGTCTTGTAATTGGAATGATGGTGACCTAAACCCTCACCAGAGTAACAATTGGAGGGCAAGTCTGGTGCCAGCAGCCGCGGTAATTCCAGCTCCAATAGCGTATATTAAACTTGTTGCAGTTAAAAAGCTCGTAGTTGAATTTTTGCGTGGTGTTAATATTGACTGATGTCGAGATTGCACTTCGCTTTTGGGATTTTTCCCTTTTTACTTTGAGAAAATTAGAGTGTTTCAAGCAGACTTTTGTCTTGAATACTTCAGCATGGAATAATAGAGTAGGACTTTGGTTCTATTTTGTTGGTTTGTGAACCTTAGTAATGGTTAATAGGAACGGTTGGGGGCATTCGTATT
MagnaDeer40C	Netherlands	Capreolus capreolus		Babesia capreoli	no ambiguous nucleotides	TTGTCTTGTAATTGGAATGATGGTGACCTAAACCCTCACCAGAGTAACAATTGGAGGGCAAGTCTGGTGCCAGCAGCCGCGGTAATTCCAGCTCCAATAGCGTATATTAAACTTGTTGCAGTTAAAAAGCTCGTAGTTGAATTTTTGCGTGGTGTTAATATTGACTGATGTCGAGATTGCACTTCGCTTTTGGGATTTTTCCCTTTTTACTTTGAGAAAATTAGAGTGTTTCAAGCAGACTTTTGTCTTGAATACTTCAGCATGGAATAATAGAGTAGGACTTTGGTTCTATTTTGTTGGTTTGTGAACCTTAGTAATGGTTAATAGGAACGGTTGGGGGCATTCGTATT
MagnaDeer40F	Netherlands	Capreolus capreolus		Babesia capreoli	no ambiguous nucleotides	TTGTCTTGTAATTGGAATGATGGTGACCTAAACCCTCACCAGAGTAACAATTGGAGGGCAAGTCTGGTGCCAGCAGCCGCGGTAATTCCAGCTCCAATAGCGTATATTAAACTTGTTGCAGTTAAAAAGCTCGTAGTTGAATTTTTGCGTGGTGTTAATATTGACTGATGTCGAGATTGCACTTCGCTTTTGGGATTTTTCCCTTTTTACTTTGAGAAAATTAGAGTGTTTCAAGCAGACTTTTGTCTTGAATACTTCAGCATGGAATAATAGAGTAGGACTTTGGTTCTATTTTGTTGGTTTGTGAACCTTAGTAATGGTTAATAGGAACGGTTGGGGGCATTCGTATT
MagnaDeer42H	Netherlands	Capreolus capreolus		Babesia capreoli	no ambiguous nucleotides	TTGTCTTGTAATTGGAATGATGGTGACCTAAACCCTCACCAGAGTAACAATTGGAGGGCAAGTCTGGTGCCAGCAGCCGCGGTAATTCCAGCTCCAATAGCGTATATTAAACTTGTTGCAGTTAAAAAGCTCGTAGTTGAATTTTTGCGTGGTGTTAATATTGACTGATGTCGAGATTGCACTTCGCTTTTGGGATTTTTCCCTTTTTACTTTGAGAAAATTAGAGTGTTTCAAGCAGACTTTTGTCTTGAATACTTCAGCATGGAATAATAGAGTAGGACTTTGGTTCTATTTTGTTGGTTTGTGAACCTTAGTAATGGTTAATAGGAACGGTTGGGGGCATTCGTATT
MagnaDeer43D	Netherlands	Capreolus capreolus		Babesia capreoli	no ambiguous nucleotides	TTGTCTTGTAATTGGAATGATGGTGACCTAAACCCTCACCAGAGTAACAATTGGAGGGCAAGTCTGGTGCCAGCAGCCGCGGTAATTCCAGCTCCAATAGCGTATATTAAACTTGTTGCAGTTAAAAAGCTCGTAGTTGAATTTTTGCGTGGTGTTAATATTGACTGATGTCGAGATTGCACTTCGCTTTTGGGATTTTTCCCTTTTTACTTTGAGAAAATTAGAGTGTTTCAAGCAGACTTTTGTCTTGAATACTTCAGCATGGAATAATAGAGTAGGACTTTGGTTCTATTTTGTTGGTTTGTGAACCTTAGTAATGGTTAATAGGAACGGTTGGGGGCATTCGTATT
MagnaDeer43E	Netherlands	Capreolus capreolus		Babesia capreoli	no ambiguous nucleotides	TTGTCTTGTAATTGGAATGATGGTGACCTAAACCCTCACCAGAGTAACAATTGGAGGGCAAGTCTGGTGCCAGCAGCCGCGGTAATTCCAGCTCCAATAGCGTATATTAAACTTGTTGCAGTTAAAAAGCTCGTAGTTGAATTTTTGCGTGGTGTTAATATTGACTGATGTCGAGATTGCACTTCGCTTTTGGGATTTTTCCCTTTTTACTTTGAGAAAATTAGAGTGTTTCAAGCAGACTTTTGTCTTGAATACTTCAGCATGGAATAATAGAGTAGGACTTTGGTTCTATTTTGTTGGTTTGTGAACCTTAGTAATGGTTAATAGGAACGGTTGGGGGCATTCGTATT
MagnaDeer54G	Netherlands	Capreolus capreolus		Babesia capreoli	no ambiguous nucleotides	TTGTCTTGTAATTGGAATGATGGTGACCTAAACCCTCACCAGAGTAACAATTGGAGGGCAAGTCTGGTGCCAGCAGCCGCGGTAATTCCAGCTCCAATAGCGTATATTAAACTTGTTGCAGTTAAAAAGCTCGTAGTTGAATTTTTGCGTGGTGTTAATATTGACTGATGTCGAGATTGCACTTCGCTTTTGGGATTTTTCCCTTTTTACTTTGAGAAAATTAGAGTGTTTCAAGCAGACTTTTGTCTTGAATACTTCAGCATGGAATAATAGAGTAGGACTTTGGTTCTATTTTGTTGGTTTGTGAACCTTAGTAATGGTTAATAGGAACGGTTGGGGGCATTCGTATT
MagnaDeer56B	Netherlands	Capreolus capreolus		Babesia capreoli	no ambiguous nucleotides	TTGTCTTGTAATTGGAATGATGGTGACCTAAACCCTCACCAGAGTAACAATTGGAGGGCAAGTCTGGTGCCAGCAGCCGCGGTAATTCCAGCTCCAATAGCGTATATTAAACTTGTTGCAGTTAAAAAGCTCGTAGTTGAATTTTTGCGTGGTGTTAATATTGACTGATGTCGAGATTGCACTTCGCTTTTGGGATTTTTCCCTTTTTACTTTGAGAAAATTAGAGTGTTTCAAGCAGACTTTTGTCTTGAATACTTCAGCATGGAATAATAGAGTAGGACTTTGGTTCTATTTTGTTGGTTTGTGAACCTTAGTAATGGTTAATAGGAACGGTTGGGGGCATTCGTATT
MagnaDeer57D	Netherlands	Capreolus capreolus		Babesia capreoli	no ambiguous nucleotides	TTGTCTTGTAATTGGAATGATGGTGACCTAAACCCTCACCAGAGTAACAATTGGAGGGCAAGTCTGGTGCCAGCAGCCGCGGTAATTCCAGCTCCAATAGCGTATATTAAACTTGTTGCAGTTAAAAAGCTCGTAGTTGAATTTTTGCGTGGTGTTAATATTGACTGATGTCGAGATTGCACTTCGCTTTTGGGATTTTTCCCTTTTTACTTTGAGAAAATTAGAGTGTTTCAAGCAGACTTTTGTCTTGAATACTTCAGCATGGAATAATAGAGTAGGACTTTGGTTCTATTTTGTTGGTTTGTGAACCTTAGTAATGGTTAATAGGAACGGTTGGGGGCATTCGTATT
MagnaDeer57F	Netherlands	Capreolus capreolus		Babesia capreoli	no ambiguous nucleotides	TTGTCTTGTAATTGGAATGATGGTGACCTAAACCCTCACCAGAGTAACAATTGGAGGGCAAGTCTGGTGCCAGCAGCCGCGGTAATTCCAGCTCCAATAGCGTATATTAAACTTGTTGCAGTTAAAAAGCTCGTAGTTGAATTTTTGCGTGGTGTTAATATTGACTGATGTCGAGATTGCACTTCGCTTTTGGGATTTTTCCCTTTTTACTTTGAGAAAATTAGAGTGTTTCAAGCAGACTTTTGTCTTGAATACTTCAGCATGGAATAATAGAGTAGGACTTTGGTTCTATTTTGTTGGTTTGTGAACCTTAGTAATGGTTAATAGGAACGGTTGGGGGCATTCGTATT
MagnaDeer26D	Netherlands	Capreolus capreolus		Babesia capreoli	no ambiguous nucleotides	GATGGTGACCTAAACCCTCACCAGAGTAACAATTGGAGGGCAAGTCTGGTGCCAGCAGCCGCGGTAATTCCAGCTCCAATAGCGTATATTAAACTTGTTGCAGTTAAAAAGCTCGTAGTTGAATTTTTGCGTGGTGTTAATATTGACTGATGTCGAGATTGCACTTCGCTTTTGGGATTTTTCCCTTTTTACTTTGAGAAAATTAGAGTGTTTCAAGCAGACTTTTGTCTTGAATACTTCAGCATGGAATAATAGAGTAGGACTTTGGTTCTATTTTGTTGGTTTGTGAACCTTAGTAATGGTTAATAGGAACGGTTGGGGGCATTCGTATT
MagnaDeer27H	Netherlands	Capreolus capreolus		Babesia capreoli	no ambiguous nucleotides	GATGGTGACCTAAACCCTCACCAGAGTAACAATTGGAGGGCAAGTCTGGTGCCAGCAGCCGCGGTAATTCCAGCTCCAATAGCGTATATTAAACTTGTTGCAGTTAAAAAGCTCGTAGTTGAATTTTTGCGTGGTGTTAATATTGACTGATGTCGAGATTGCACTTCGCTTTTGGGATTTTTCCCTTTTTACTTTGAGAAAATTAGAGTGTTTCAAGCAGACTTTTGTCTTGAATACTTCAGCATGGAATAATAGAGTAGGACTTTGGTTCTATTTTGTTGGTTTGTGAACCTTAGTAATGGTTAATAGGAACGGTTGGGGGCATTCGTATT
MagnaDeer32D	Netherlands	Capreolus capreolus		Babesia capreoli	no ambiguous nucleotides	GATGGTGACCTAAACCCTCACCAGAGTAACAATTGGAGGGCAAGTCTGGTGCCAGCAGCCGCGGTAATTCCAGCTCCAATAGCGTATATTAAACTTGTTGCAGTTAAAAAGCTCGTAGTTGAATTTTTGCGTGGTGTTAATATTGACTGATGTCGAGATTGCACTTCGCTTTTGGGATTTTTCCCTTTTTACTTTGAGAAAATTAGAGTGTTTCAAGCAGACTTTTGTCTTGAATACTTCAGCATGGAATAATAGAGTAGGACTTTGGTTCTATTTTGTTGGTTTGTGAACCTTAGTAATGGTTAATAGGAACGGTTGGGGGCATTCGTATT
MagnaDeer34D	Netherlands	Capreolus capreolus		Babesia capreoli	no ambiguous nucleotides	GATGGTGACCTAAACCCTCACCAGAGTAACAATTGGAGGGCAAGTCTGGTGCCAGCAGCCGCGGTAATTCCAGCTCCAATAGCGTATATTAAACTTGTTGCAGTTAAAAAGCTCGTAGTTGAATTTTTGCGTGGTGTTAATATTGACTGATGTCGAGATTGCACTTCGCTTTTGGGATTTTTCCCTTTTTACTTTGAGAAAATTAGAGTGTTTCAAGCAGACTTTTGTCTTGAATACTTCAGCATGGAATAATAGAGTAGGACTTTGGTTCTATTTTGTTGGTTTGTGAACCTTAGTAATGGTTAATAGGAACGGTTGGGGGCATTCGTATT
MagnaDeer36G	Netherlands	Capreolus capreolus		Babesia capreoli	no ambiguous nucleotides	GATGGTGACCTAAACCCTCACCAGAGTAACAATTGGAGGGCAAGTCTGGTGCCAGCAGCCGCGGTAATTCCAGCTCCAATAGCGTATATTAAACTTGTTGCAGTTAAAAAGCTCGTAGTTGAATTTTTGCGTGGTGTTAATATTGACTGATGTCGAGATTGCACTTCGCTTTTGGGATTTTTCCCTTTTTACTTTGAGAAAATTAGAGTGTTTCAAGCAGACTTTTGTCTTGAATACTTCAGCATGGAATAATAGAGTAGGACTTTGGTTCTATTTTGTTGGTTTGTGAACCTTAGTAATGGTTAATAGGAACGGTTGGGGGCATTCGTATT
MagnaDeer57A	Netherlands	Capreolus capreolus		Babesia capreoli	no ambiguous nucleotides	GTGACCTAAACCCTCACCAGAGTAACAATTGGAGGGCAAGTCTGGTGCCAGCAGCCGCGGTAATTCCAGCTCCAATAGCGTATATTAAACTTGTTGCAGTTAAAAAGCTCGTAGTTGAATTTTTGCGTGGTGTTAATATTGACTGATGTCGAGATTGCACTTCGCTTTTGGGATTTTTCCCTTTTTACTTTGAGAAAATTAGAGTGTTTCAAGCAGACTTTTGTCTTGAATACTTCAGCATGGAATAATAGAGTAGGACTTTGGTTCTATTTTGTTGGTTTGTGAACCTTAGTAATGGTTAATAGGAACGGTTGGGGGCATTCGTATT
MagnaDeer32C	Netherlands	Capreolus capreolus		Babesia capreoli	no ambiguous nucleotides	TGCCAGCAGCCGCGGTAATTCCAGCTCCAATAGCGTATATTAAACTTGTTGCAGTTAAAAAGCTCGTAGTTGAATTTTTGCGTGGTGTTAATATTGACTGATGTCGAGATTGCACTTCGCTTTTGGGATTTTTCCCTTTTTACTTTGAGAAAATTAGAGTGTTTCAAGCAGACTTTTGTCTTGAATACTTCAGCATGGAATAATAGAGTAGGACTTTGGTTCTATTTTGTTGGTTTGTGAACCTTAGTAATGGTTAATAGGAACGGTTGGGGGCATTCGTATT
PWN30_4F	Netherlands	Dama dama		Babesia capreoli		AAATAACAATACAGGGCAATTGTCTTGTAATTGGAATGATGGTGACCTAAACCCTCACCAGAGTAACAATTGGAGGGCAAGTCTGGTGCCAGCAGCCGCGGTAATTCCAGCTCCAATAGCGTATATTAAACTTGTTGCAGTTAAAAAGCTCGTAGTTGAATTTTTGCGTGGTGTTAATATTGACTGATGTCGAGATTGCACTTCGCTTTTGGGATTTTTCCCTTTTTACTTTGAGAAAATTAGAGTGTTTCAAGCAGACTTTTGTCTTGAATACTTCAGCATGGAATAATAGAGTAGGACTTTGGTTCTATTTTGTTGGTTTGTGAACCTTAGTAATGGTTAATAGGAACGGTTGGGGGCATTCGTATT
PWN14_2F	Netherlands	Dama dama		Babesia capreoli		AAATAACAATACAGGGCAATTGTCTTGTAATTGGAATGATGGTGACCTAAACCCTCACCAGAGTAACAATTGGAGGGCAAGTCTGGTGCCAGCAGCCGCGGTAATTCCAGCTCCAATAGCGTATATTAAACTTGTTGCAGTTAAAAAGCTCGTAGTTGAATTTTTGCGTGGTGTTAATATTGACTGATGTCGAGATTGCACTTCGCTTTTGGGATTTTTCCCTTTTTACTTTGAGAAAATTAGAGTGTTTCAAGCAGACTTTTGTCTTGAATACTTCAGCATGGAATAATAGAGTAGGACTTTGGTTCTATTTTGTTGGTTTGTGAACCTTAGTAATGGTTAATAGGAACGGTTGGGGGCATTCGTATT
PWN34_5B	Netherlands	Dama dama		Babesia capreoli		AAATAACAATACAGGGCAATTGTCTTGTAATTGGAATGATGGTGACCTAAACCCTCACCAGAGTAACAATTGGAGGGCAAGTCTGGTGCCAGCAGCCGCGGTAATTCCAGCTCCAATAGCGTATATTAAACTTGTTGCAGTTAAAAAGCTCGTAGTTGAATTTTTGCGTGGTGTTAATATTGACTGATGTCGAGATTGCACTTCGCTTTTGGGATTTTTCCCTTTTTACTTTGAGAAAATTAGAGTGTTTCAAGCAGACTTTTGTCTTGAATACTTCAGCATGGAATAATAGAGTAGGACTTTGGTTCTATTTTGTTGGTTTGTGAACCTTAGTAATGGTTAATAGGAACGGTTGGGGGCATTCGTATT
PWN40_5H	Netherlands	Dama dama		Babesia capreoli		AAATAACAATACAGGGCAATTGTCTTGTAATTGGAATGATGGTGACCTAAACCCTCACCAGAGTAACAATTGGAGGGCAAGTCTGGTGCCAGCAGCCGCGGTAATTCCAGCTCCAATAGCGTATATTAAACTTGTTGCAGTTAAAAAGCTCGTAGTTGAATTTTTGCGTGGTGTTAATATTGACTGATGTCGAGATTGCACTTCGCTTTTGGGATTTTTCCCTTTTTACTTTGAGAAAATTAGAGTGTTTCAAGCAGACTTTTGTCTTGAATACTTCAGCATGGAATAATAGAGTAGGACTTTGGTTCTATTTTGTTGGTTTGTGAACCTTAGTAATGGTTAATAGGAACGGTTGGGGGCATTCGTATT
BelgieWIV424	Belgium	Ixodes ricinus	2017	Babesia capreoli	no ambiguous nucleotides	AAATAACAATACAGGGCAATTGTCTTGTAATTGGAATGATGGTGACCTAAACCCTCACCAGAGTAACAATTGGAGGGCAAGTCTGGTGCCAGCAGCCGCGGTAATTCCAGCTCCAATAGCGTATATTAAACTTGTTGCAGTTAAAAAGCTCGTAGTTGAATTTTTGCGTGGTGTTAATATTGACTGATGTCGAGATTGCACTTCGCTTTTGGGATTTTTCCCTTTTTACTTTGAGAAAATTAGAGTGTTTCAAGCAGACTTTTGTCTTGAATACTTCAGCATGGAATAATAGAGTAGGACTTTGGTTCTATTTTGTTGGTTTGTGAACCTTAGTAATGGTTAATAGGAACGGTTGGGGGCATTCGTATT
UrbanRural1442	Belgium	Ixodes ricinus	2016	Babesia capreoli	no ambiguous nucleotides	AAATAACAATACAGGGCAATTGTCTTGTAATTGGAATGATGGTGACCTAAACCCTCACCAGAGTAACAATTGGAGGGCAAGTCTGGTGCCAGCAGCCGCGGTAATTCCAGCTCCAATAGCGTATATTAAACTTGTTGCAGTTAAAAAGCTCGTAGTTGAATTTTTGCGTGGTGTTAATATTGACTGATGTCGAGATTGCACTTCGCTTTTGGGATTTTTCCCTTTTTACTTTGAGAAAATTAGAGTGTTTCAAGCAGACTTTTGTCTTGAATACTTCAGCATGGAATAATAGAGTAGGACTTTGGTTCTATTTTGTTGGTTTGTGAACCTTAGTAATGGTTAATAGGAACGGTTGGGGGCATTCGTATT
UrbanRural449	Belgium	Ixodes ricinus	2016	Babesia capreoli	no ambiguous nucleotides	AAATAACAATACAGGGCAATTGTCTTGTAATTGGAATGATGGTGACCTAAACCCTCACCAGAGTAACAATTGGAGGGCAAGTCTGGTGCCAGCAGCCGCGGTAATTCCAGCTCCAATAGCGTATATTAAACTTGTTGCAGTTAAAAAGCTCGTAGTTGAATTTTTGCGTGGTGTTAATATTGACTGATGTCGAGATTGCACTTCGCTTTTGGGATTTTTCCCTTTTTACTTTGAGAAAATTAGAGTGTTTCAAGCAGACTTTTGTCTTGAATACTTCAGCATGGAATAATAGAGTAGGACTTTGGTTCTATTTTGTTGGTTTGTGAACCTTAGTAATGGTTAATAGGAACGGTTGGGGGCATTCGTATT
1072HST	Netherlands	Ixodes ricinus		Babesia capreoli	no ambiguous nucleotides	AAATAACAATACAGGGCAATTGTCTTGTAATTGGAATGATGGTGACCTAAACCCTCACCAGAGTAACAATTGGAGGGCAAGTCTGGTGCCAGCAGCCGCGGTAATTCCAGCTCCAATAGCGTATATTAAACTTGTTGCAGTTAAAAAGCTCGTAGTTGAATTTTTGCGTGGTGTTAATATTGACTGATGTCGAGATTGCACTTCGCTTTTGGGATTTTTCCCTTTTTACTTTGAGAAAATTAGAGTGTTTCAAGCAGACTTTTGTCTTGAATACTTCAGCATGGAATAATAGAGTAGGACTTTGGTTCTATTTTGTTGGTTTGTGAACCTTAGTAATGGTTAATAGGAACGGTTGGGGGCATTCGTATT
1314ST1	Netherlands	Ixodes ricinus	2017	Babesia capreoli	no ambiguous nucleotides	AAATAACAATACAGGGCAATTGTCTTGTAATTGGAATGATGGTGACCTAAACCCTCACCAGAGTAACAATTGGAGGGCAAGTCTGGTGCCAGCAGCCGCGGTAATTCCAGCTCCAATAGCGTATATTAAACTTGTTGCAGTTAAAAAGCTCGTAGTTGAATTTTTGCGTGGTGTTAATATTGACTGATGTCGAGATTGCACTTCGCTTTTGGGATTTTTCCCTTTTTACTTTGAGAAAATTAGAGTGTTTCAAGCAGACTTTTGTCTTGAATACTTCAGCATGGAATAATAGAGTAGGACTTTGGTTCTATTTTGTTGGTTTGTGAACCTTAGTAATGGTTAATAGGAACGGTTGGGGGCATTCGTATT
1549EST	Netherlands	Ixodes ricinus		Babesia capreoli	no ambiguous nucleotides	AAATAACAATACAGGGCAATTGTCTTGTAATTGGAATGATGGTGACCTAAACCCTCACCAGAGTAACAATTGGAGGGCAAGTCTGGTGCCAGCAGCCGCGGTAATTCCAGCTCCAATAGCGTATATTAAACTTGTTGCAGTTAAAAAGCTCGTAGTTGAATTTTTGCGTGGTGTTAATATTGACTGATGTCGAGATTGCACTTCGCTTTTGGGATTTTTCCCTTTTTACTTTGAGAAAATTAGAGTGTTTCAAGCAGACTTTTGTCTTGAATACTTCAGCATGGAATAATAGAGTAGGACTTTGGTTCTATTTTGTTGGTTTGTGAACCTTAGTAATGGTTAATAGGAACGGTTGGGGGCATTCGTATT
226BST	Netherlands	Ixodes ricinus	2017	Babesia capreoli	no ambiguous nucleotides	AAATAACAATACAGGGCAATTGTCTTGTAATTGGAATGATGGTGACCTAAACCCTCACCAGAGTAACAATTGGAGGGCAAGTCTGGTGCCAGCAGCCGCGGTAATTCCAGCTCCAATAGCGTATATTAAACTTGTTGCAGTTAAAAAGCTCGTAGTTGAATTTTTGCGTGGTGTTAATATTGACTGATGTCGAGATTGCACTTCGCTTTTGGGATTTTTCCCTTTTTACTTTGAGAAAATTAGAGTGTTTCAAGCAGACTTTTGTCTTGAATACTTCAGCATGGAATAATAGAGTAGGACTTTGGTTCTATTTTGTTGGTTTGTGAACCTTAGTAATGGTTAATAGGAACGGTTGGGGGCATTCGTATT
RJ2688	Netherlands	Ixodes ricinus	2013	Babesia capreoli	no ambiguous nucleotides	AAATAACAATACAGGGCAATTGTCTTGTAATTGGAATGATGGTGACCTAAACCCTCACCAGAGTAACAATTGGAGGGCAAGTCTGGTGCCAGCAGCCGCGGTAATTCCAGCTCCAATAGCGTATATTAAACTTGTTGCAGTTAAAAAGCTCGTAGTTGAATTTTTGCGTGGTGTTAATATTGACTGATGTCGAGATTGCACTTCGCTTTTGGGATTTTTCCCTTTTTACTTTGAGAAAATTAGAGTGTTTCAAGCAGACTTTTGTCTTGAATACTTCAGCATGGAATAATAGAGTAGGACTTTGGTTCTATTTTGTTGGTTTGTGAACCTTAGTAATGGTTAATAGGAACGGTTGGGGGCATTCGTATT
RJ5193	Netherlands	Ixodes ricinus	2014	Babesia capreoli	no ambiguous nucleotides	AAATAACAATACAGGGCAATTGTCTTGTAATTGGAATGATGGTGACCTAAACCCTCACCAGAGTAACAATTGGAGGGCAAGTCTGGTGCCAGCAGCCGCGGTAATTCCAGCTCCAATAGCGTATATTAAACTTGTTGCAGTTAAAAAGCTCGTAGTTGAATTTTTGCGTGGTGTTAATATTGACTGATGTCGAGATTGCACTTCGCTTTTGGGATTTTTCCCTTTTTACTTTGAGAAAATTAGAGTGTTTCAAGCAGACTTTTGTCTTGAATACTTCAGCATGGAATAATAGAGTAGGACTTTGGTTCTATTTTGTTGGTTTGTGAACCTTAGTAATGGTTAATAGGAACGGTTGGGGGCATTCGTATT
RJ5643	Netherlands	Ixodes ricinus	2015	Babesia capreoli	no ambiguous nucleotides	AAATAACAATACAGGGCAATTGTCTTGTAATTGGAATGATGGTGACCTAAACCCTCACCAGAGTAACAATTGGAGGGCAAGTCTGGTGCCAGCAGCCGCGGTAATTCCAGCTCCAATAGCGTATATTAAACTTGTTGCAGTTAAAAAGCTCGTAGTTGAATTTTTGCGTGGTGTTAATATTGACTGATGTCGAGATTGCACTTCGCTTTTGGGATTTTTCCCTTTTTACTTTGAGAAAATTAGAGTGTTTCAAGCAGACTTTTGTCTTGAATACTTCAGCATGGAATAATAGAGTAGGACTTTGGTTCTATTTTGTTGGTTTGTGAACCTTAGTAATGGTTAATAGGAACGGTTGGGGGCATTCGTATT
RJ6792	Netherlands	Ixodes ricinus	2015	Babesia capreoli	no ambiguous nucleotides	AAATAACAATACAGGGCAATTGTCTTGTAATTGGAATGATGGTGACCTAAACCCTCACCAGAGTAACAATTGGAGGGCAAGTCTGGTGCCAGCAGCCGCGGTAATTCCAGCTCCAATAGCGTATATTAAACTTGTTGCAGTTAAAAAGCTCGTAGTTGAATTTTTGCGTGGTGTTAATATTGACTGATGTCGAGATTGCACTTCGCTTTTGGGATTTTTCCCTTTTTACTTTGAGAAAATTAGAGTGTTTCAAGCAGACTTTTGTCTTGAATACTTCAGCATGGAATAATAGAGTAGGACTTTGGTTCTATTTTGTTGGTTTGTGAACCTTAGTAATGGTTAATAGGAACGGTTGGGGGCATTCGTATT
TR2298	Netherlands	Ixodes ricinus	2012	Babesia capreoli	no ambiguous nucleotides	AAATAACAATACAGGGCAATTGTCTTGTAATTGGAATGATGGTGACCTAAACCCTCACCAGAGTAACAATTGGAGGGCAAGTCTGGTGCCAGCAGCCGCGGTAATTCCAGCTCCAATAGCGTATATTAAACTTGTTGCAGTTAAAAAGCTCGTAGTTGAATTTTTGCGTGGTGTTAATATTGACTGATGTCGAGATTGCACTTCGCTTTTGGGATTTTTCCCTTTTTACTTTGAGAAAATTAGAGTGTTTCAAGCAGACTTTTGTCTTGAATACTTCAGCATGGAATAATAGAGTAGGACTTTGGTTCTATTTTGTTGGTTTGTGAACCTTAGTAATGGTTAATAGGAACGGTTGGGGGCATTCGTATT
TR279	Netherlands	Ixodes ricinus	2012	Babesia capreoli	no ambiguous nucleotides	AAATAACAATACAGGGCAATTGTCTTGTAATTGGAATGATGGTGACCTAAACCCTCACCAGAGTAACAATTGGAGGGCAAGTCTGGTGCCAGCAGCCGCGGTAATTCCAGCTCCAATAGCGTATATTAAACTTGTTGCAGTTAAAAAGCTCGTAGTTGAATTTTTGCGTGGTGTTAATATTGACTGATGTCGAGATTGCACTTCGCTTTTGGGATTTTTCCCTTTTTACTTTGAGAAAATTAGAGTGTTTCAAGCAGACTTTTGTCTTGAATACTTCAGCATGGAATAATAGAGTAGGACTTTGGTTCTATTTTGTTGGTTTGTGAACCTTAGTAATGGTTAATAGGAACGGTTGGGGGCATTCGTATT
TTPP495	Netherlands	Ixodes ricinus	2013	Babesia capreoli	no ambiguous nucleotides	AAATAACAATACAGGGCAATTGTCTTGTAATTGGAATGATGGTGACCTAAACCCTCACCAGAGTAACAATTGGAGGGCAAGTCTGGTGCCAGCAGCCGCGGTAATTCCAGCTCCAATAGCGTATATTAAACTTGTTGCAGTTAAAAAGCTCGTAGTTGAATTTTTGCGTGGTGTTAATATTGACTGATGTCGAGATTGCACTTCGCTTTTGGGATTTTTCCCTTTTTACTTTGAGAAAATTAGAGTGTTTCAAGCAGACTTTTGTCTTGAATACTTCAGCATGGAATAATAGAGTAGGACTTTGGTTCTATTTTGTTGGTTTGTGAACCTTAGTAATGGTTAATAGGAACGGTTGGGGGCATTCGTATT
MagnaDeer3F	Netherlands	Capreolus capreolus		Babesia capreoli	ambiguous nucleotides	AAATAACAATACAGGGCAATTGTCTTGTAATTGGAATGATGGTGACCTAAACCCTCACCAGAGTAACAATTGGAGGGCAAGTCTGGTGCCAGCAGCCGCGGTAATTCCAGCTCCAATAGCGTATATTAAACTTGTTGCAGTTAAAAAGCTCGTAGTTGAATTTTTGCGTGGTGTTAATATTGACTGATGTCGAGATTGCACTTCGCTTTTGGGATTTTTCCCTTTTTACTTTGAGAAAATTAGAGTGTTTCAAGCAGACTTTTGTCTTGAATACTTCAGCATGGAATAATAGAGTAGGACTTTGGTTCTATTTTGTTGGTTTGTGAACCTTAGTAATGGTTAATAGGAACGGTTGGGGGCATTCRTATT
MagnaDeer50A	Netherlands	Capreolus capreolus		Babesia capreoli	ambiguous nucleotides	AAATAACAATACAGGGCAATTGTCTTGTAATTGGAATGATGGTGACCTAAACCCTCACCAGAGTAACAATTGGAGGGCAAGTCTGGTGCCAGCAGCCGCGGTAATTCCAGCTCCAATAGCGTATATTAAACTTGTTGCAGTTAAAAAGCTCGTAGTTGAATTTTTGCGTGGTGTTAATATTGACTGATGTCGAGATTGCACTTCGCTTTTGGGATTTTTCCCTTTTTACTTTGAGAAAATTAGAGTGTTTCAAGCAGACTTTTGTCTTGAATACTTCAGCATGGAATAATAGAGTAGGACTTTGGTTCTATTTTGTTGGTTTGTGAACCTTAGTAATGGTTAATAGGAACGGTTGGGGGCATTCKTATT
MagnaDeer75A	Netherlands	Capreolus capreolus		Babesia capreoli	ambiguous nucleotides	AAATAACAATACAGGGCAATTGTCTTGTAATTGGAATGATGGTGACCTAAACCCTCACCAGAGTAACAATTGGAGGGCAAGTCTGGTGCCAGCAGCCGCGGTAATTCCAGCTCCAATAGCGTATATTAAACTTGTTGCAGTTAAAAAGCTCGTAGTTGAATTTTTGCGTGGTGTTAATATTGACTGATGTCGAGATTGCACTTCGCTTTTGGGATTTTTCCCTTTTTACTTTGAGAAAATTAGAGTGTTTCAAGCAGACTTTTGTCTTGAATACTTCAGCATGGAATAATAGAGTAGGACTTTGGTTCTATTTTGTTGGTTTGTGAACCTTAGTAATGGTTAATAGGAACGGTTGGGGGCAWTCGTATT
MagnaDeer13F	Netherlands	Capreolus capreolus		Babesia capreoli	ambiguous nucleotides	AAATAACAATACAGGGCAATTGTCTTGTAATTGGAATGATGGTGACCTAAACCCTCACCAGAGTAACAATTGGAGGGCAAGTCTGGTGCCAGCAGCCGCGGTAATTCCAGCTCCAATAGCGTATATTAAACTTGTTGCAGTTAAAAAGCTCGTAGTTGAATTTTTGCGTGGTGKTAATATTGACTGATGTCGAGATTGCACTTCGCTTTTGGGATTTTTCCCTTTTTACTTTGAGAAAATTAGAGTGTTTCAAGCAGACTTTTGTCTTGAATACTTCAGCATGGAATAATAGAGTAGGACTTTGGTTCTATTTTGTTGGTTTGTGAACCTTAGTAATGGTTAATAGGAACGGTTGGGGGCATTCGTATT
MagnaDeer41D	Netherlands	Capreolus capreolus		Babesia capreoli	ambiguous nucleotides	AAATAACAATACAGGGCAATTGTCTTGTAATTGGAATGATGGTGACCTAAACCCTCACCAGAGTAACAATTGGAGGGCAAGTCTGGTGCCAGCAGCCGCGGTAATTCCAGCTCCAATAGCGTATATTAAACTTGTTGCAGTTAAAAAGCTCGTAGTTGAATTTTTGCGTGGTGTTAATATTGACTGATGTCGAGATTGCACTTCGCTTTTGGGATTTTTCCCTTTTTACTTTGAGAAAATTAGAGTGTTTCAAGCAGACTTTTGTCTTGAATACTTCAGCATGGAATAATAGAGTAGGACTTTGGTTCTATTTTGTTGGTTTGTGAACCTTARTAATGGTTAATAGGAACGGTTGGGGGCATTCGTATT
MagnaDeer59C	Netherlands	Capreolus capreolus		Babesia capreoli	ambiguous nucleotides	AAATAACAATACAGGGCAATTGTCTTGTAATTGGAATGATGGTGACCTAAACCCTCACCAGAGTAACAATTGGAGGGCAAGTCTGGTGCCAGCAGCCGCGGTAATTCCAGCTCCAATAGCGTATATTAAACTTGTTGCAGTTAAAAAGCTCGTAGTTGAATTTTTGCGTGGTGTTAATATTGACTGATGTCGAGATTGCACTTCGCTTTTGGGATTTTTCCCTTTTTACTTTGAGAAAATTAGAGTGTTTCAAGCAGACTTTTGTCTTGAATACTTCAGCATGGAATAATAGAGTAGGACTTTGGTTCTATTTTGTTGGTTTGTGAACCTTARTAATGGTTAATAGGAACGGTTGGGGGCATTCGTATT
MagnaDeer64G	Netherlands	Capreolus capreolus		Babesia capreoli	ambiguous nucleotides	AAATAACAATACAGGGCAATTGTCTTGTAATTGGAATGATGGTGACCTAAACCCTCACCAGAGTAACAATTGGAGGGCAAGTCTGGTGCCAGCAGCCGCGGTAATTCCAGCTCCAATAGCGTATATTAAACTTGTTGCAGTTAAAAAGCTCGTAGTTGAATTTTTGSGTGGTGTTAATATTGACTGATGTCGAGATTGCACTTCGCTTTTGGGATTTTTCCCTTTTTACTTTGAGAAAATTAGAGTGTTTCAAGCAGACTTTTGTCTTGAATACTTCAGCATGGAATAATAGAGTAGGACTTTGGTTCTATTTTGTTGGTTTGTGAACCTTAGTAATGGTTAATAGGAACGGTTGGGGGCATTCGTATT
MagnaDeer71H	Netherlands	Capreolus capreolus		Babesia capreoli	ambiguous nucleotides	AAATAACAATACAGGGCAATTGTCTTGTAATTGGAATGATGGTGACCTAAACCCTCACCAGAGTAACAATTGGAGGGCAAGTCTGGTGCCAGCAGCCGCGGTAATTCCAGCTCCAATAGCGTATATTAAACTTGTTGCAGTTAAAAAGCTCGTAGTTGAATTTTTGCGTGGTGTTAATATTGACTGATGTCGAGATTGCACTTCGCTTTTGRGATTTTTCCCTTTTTACTTTGAGAAAATTAGAGTGTTTCAAGCAGACTTTTGTCTTGAATACTTCAGCATGGAATAATAGAGTAGGACTTTGGTTCTATTTTGTTGGTTTGTGAACCTTAGTAATGGTTAATAGGAACGGTTGGGGGCATTCGTATT
B2 S5 52	Netherlands	Capreolus capreolus	2014	Babesia capreoli	ambiguous nucleotides	AAATAACAATACAGGGCAATTGTCTTGTAATTGGAATGATGGTGACCTAAACCCTCACCAGAGTAACAATTGGAGGGCAAGTCTGGTGCCAGCAGCCGCGGTAATTCCAGCTCCAATAGCGTATATTAAACTTGTTGCAGTTAAAAAGCTCGTAGTTGAATTTTTGCGTGGTGTTAATATTGACTGATGTCGAGATTGCACTTCGCTTTTGGGATTTTTCCCTTTTTACTTTGAGAAAATTAGAGTGTTTCAAGCAGACTTTTGTCTTGAATACTTCAGCATGGAATAATAGAGTAGGACTTTGGTTCTATTTTGTTGGTTTGTGAACCTTARTAATGGTTAATAGGAACGGTTGGGG
RJ1193	Netherlands	Ixodes ricinus	2013	Babesia capreoli	ambiguous nucleotides	AAATAACAATACAGGGCAATTGTCTTGTAATTGGAATGATGGTGACCTAAACCCTCACCAGAGTAACAATTGGAGGGCAAGTCTGGTGCCAGCAGCCGCGGTAATTCCAGCTCCAATAGCGTATATTAAACTTGTTGCAGTTAAAAAGCTCGTAGTTGAATTTTTGCGTGGTGTTAATATTGACTGATGTCGAGATTGCRCTTCGCTTTTGGGATTTTTCCCTTTTTACTTTGAGAAAATTAGAGTGTTTCAAGCAGACTTTTGTCTTGAATACTTCAGCATGGAATAATAGAGTAGGACTTTGGTTCTATTTTGTTGGTTTGTGAACCTTAGTAATGGTTAATAGGAACGGTTGGGGGCATTCGTATT
MagnaDeer1B	Netherlands	Capreolus capreolus		Babesia capreoli	ambiguous nucleotides	AAATAWCAATACAGGGCAATTGTCTTGTAATTGGAATGATGGTGACCTAAACCCTCACCAGAGTAACAATTGGAGGGCAAGTCTGGTGCCAGCAGCCGCGGTAATTCCAGCTCCAATAGCGTATATTAAACTTGTTGCAGTTAAAAAGCTCGTAGTTGAATTTTTGCGTGGTGTTAATATTGACTGATGTCGAGATTGCACTTCGCTTTTGGGATTTTTCCCTTTTTACTTTGAGAAAATTAGAGTGTTTCAAGCAGACTTTTGTCTTGAATACTTCAGCATGGAATAATAGAGTAGGACTTTGGTTCTATTTTGTTGGTTTGTGAACCTTAGTAATGGTTAATAGGAACGGTTGGGGGCATWCGTATT
MagnaDeer49H	Netherlands	Capreolus capreolus		Babesia capreoli	ambiguous nucleotides	AAATAWCAATACAGGGCAATTGTCTTGTAATTGGAATGATGGTGACCTAAACCCTCACCAGAGTAACAATTGGAGGGCAAGTCTGGTGCCAGCAGCCGCGGTAATTCCAGCTCCAATAGCGTATATTAAACTTGTTGCAGTTAAAAAGCTCGTAGTTGAATTTTTGCGTGGTGTTAATATTGACTGATGTCGAGATTGCACTTCGCTTTTGGGATTTTTCCCTTTTTACTTTGAGAAAATTAGAGTGTTTCAAGCAGACTTTTGTCTTGAATACTTCAGCATGGAATAATAGAGTAGGACTTTGGTTCTATTTTGTTGGTTTGTGAACCTTAGTAATGGTTAATAGGAACGGTTGGGGGCATWCGTATT
B1 S18 67	Netherlands	Capreolus capreolus	2014	Babesia capreoli	ambiguous nucleotides	AAATAACAATACAGGGCAATTGTCTTGTAATTGGAATGATGGTGACCTAAACCCTCACCAGAGTAACAATTGGAGGGCAAGTCTGGTGCCAGCAGCCGCGGTAATTCCAGCTCCAATAGCGTATATTAAACTTGTTGCAGTTAAAAAGCTCGTAGTTGAATTTTTGCGTGGTGTTAATATTGACTGATGTCGAGATTGCACTTCGCTTTTGGGATTTTTCCCTTTTTACTTTGAGAAAATTAGAGTGTTTCAAGCAGACTTTTGTCTTGAATACTTCAGCATGGAATAATAGAGTAGGACTTTGGTTCTATTTTGTTGGTTTGTGAACCTTAKTAATGGTTAATAGGAACGGTTGGG
B2 S17 76	Netherlands	Capreolus capreolus	2014	Babesia capreoli	ambiguous nucleotides	AAATAACAATACAGGGCAATTGTCTTGTAATTGGAATGATGGTGACCTAAACCCTCACCAGAGTAACAATTGGAGGGCAAGTCTGGTGCCAGCAGCCGCGGTAATTCCAGCTCCAATAGCGTATATTAAACTTGTTGCAGTTAAAAAGCTCGTAGTTGAATTTTTGCGTGGTGTTAATATTGACTGATGTCGAGATTGCACTTCGCTTTTGGGATTTTTCCCTTTTTACTTTGAGAAAATTAGAGTGTTTCAAGCAGACTTTTGTCTTGAATACTTCAGCATGGAATAATAGAGTAGGACTTTGGTTCTATTTTGTTGGTTTGTGAACCTTAKTAATGGTTAATAGGAACGGTTGG
MagnaDeer4E	Netherlands	Capreolus capreolus		Babesia capreoli	ambiguous nucleotides	AAATAACAATACAGGGCAATTGTCTTGTAATTGGAATGATGGTGACCTAAACCCTCACCAGAGTAACAATTGGAGGGCAAGTCTGGTGCCAGCAGCCGCGGTAATTCCAGCTCCAATAGCGTATATTAAACTTGTTGCAGTTAAAAAGCTCGTAGTTGAATTTTTGCGTGGTGTTAATATTGACTGATGTCGAGATTGCACTTCGCTTTTGGGATTTTTCCCTTTTTACTTTGAGAAAATTAGAGTGTTTCAAGCAGACTTTTGTCTTGAATACTTCAGCATGGAATAATAGAGTAGGACTTTGGTTCTATTTTGTTGGTTTGTGAACCTTMGTAATGGTTAATAGGAACGG
MagnaDeer30A	Netherlands	Capreolus capreolus		Babesia capreoli	ambiguous nucleotides	TGGAATGATGGTGACCTAAACCCTCACCAGAGTAACAATTGGAGGGCAAGTCTGGTGCCAGCAGCCGCGGTAATTCCAGCTCCAATAGCGTATATTAAACTTGTTGCAGTTAAAAAGCTCGTAGTTGAATTTTTGCGTGGTGTTAATATTGACTGATGTCGAGATTGCACTTCGCTTTTGGGATTTTTCCCTTTTTACTTTGAGAAAATTAKAGTGTTTCAAGCAGACTTTTGTCTTGAATACTTCAGCATGGAATAATAGAGTAGGACTTTGGTTCTATTTTGTTGGTTTGTGAACCTTAGTAATGGTTAATAGGAACGGTTGGGGGCATTCGTATT
B2 S14 46	Netherlands	Capreolus capreolus	2014	Babesia capreoli	ambiguous nucleotides	AAATAACAATACAGGGCAATTGTCTTGTAATTGGAATGATGGTGACCTAAACCCTCACCAGAGTAACAATTGGAGGGCAAGTCTGGTGCCAGCAGCCGCGGTAATTCCAGCTCCAATAGCGTATATTAAACTTGTTGCAGTTAAAAAGCTCGTAGTTGAATTTTTGCGTGGTGTTAATATTGACTGATGTCGAGATTGCACTTCGCTTTTGGGATTTTTCCCTTTTTACTTTGAGAAAATTAGAGTGTTTCAAGCAGACTTTTGTCTTGAATACTTCAGCATGGAATAATARAGTAGGACTTTGGTTCTATTTTGTTGGTTTGTGAACCTTAKTAATGGTTAATAGGAACGGTTGGGGGCATTCGTATT
B3 S10 18	Netherlands	Capreolus capreolus	2014	Babesia capreoli	ambiguous nucleotides	AAATAACAATACAGGGCAATTGTCTTGTAATTGGAATGATGGTGACCTAAACCCTCACCAGAGTAACAATTGGAGGGCAAGTCTGGTGCCAGCAGCCGCGGTAATTCCAGCTCCAATAGCGTATATTAAACTTGTTGCAGTTAAAAAGCTCGTAGTTGAATTTTTGCGTGGTGTTAATATTGACTGATGTCGAGATTGCACTTCGCTTTTGGGATTTTTCCCTTTTTACTTTGAGAAAATTAGAGTGTTTCAAGCARACTTTTGTCTTGAATACTTCAGCATGGAATAATARAGTAGGACTTTGGTTCTATTTTGTTGGTTTGTGAACCTTAGTAATGGTTAATAGGAACGGTTGGGGGCATTCGTATT
MagnaDeer71C	Netherlands	Capreolus capreolus		Babesia capreoli	ambiguous nucleotides	AAATAWCAATACAGGGCAATTGTCTTGTAATTGGAATGATGGTGACCTAAACCCTCACCAGAGTAACAATTGGAGGGCAAGTCTGGTGCCAGCAGCCGCGGTAATTCCAGCTCCAATAGCGTATATTAAACTTGTTGCAGTTAAAAAGCTCGTAGTTGAATTTTTGCGTGGTGTTAATATTGACTGATGTCGAGATTGCACTTCGCTTTTGGGATTTTTCCCTTTTTACTTTGAGAAAATTAGAGTGTTTCAAGCAGACTTTTGTCTTGAATACTTCAGCATGGAATAATAGAGTAGGACTTTGGTTCTATTTTGTTGGTTTGTGAACCTTAGTAATGGTTAATAGGAAMGGTTGGGGGCWTTCGTATT
MagnaDeer22B	Netherlands	Capreolus capreolus		Babesia capreoli	ambiguous nucleotides	AAATAACAATMCAGGGCAATTGTCTTGTAATTGGAATGATGGTGACCTAAACCCTCACCAGAGTAACAATTGGAGGGCAAGTCTGGTGCCAGCAGCCGCGGTAATTCCAGCTCCAATAGCGTATATTAAACTTGTTGCAGTTAAAAAGCTCGTAGTTGAATTTTTGCGTGGTGTTAATATTGACTGATGTCGAGATTGCACTTCGCTTTTGGGATTTTTCCCTTTTTACTTTGAGAAAATTAGAGTGTTTCAAGCAGACTTTTGTCTTGAATACTTCAGCATGGAATAATARAGTAGGACTTTGGTTCTATTTTGTTGGTTTGTGAACCTTASTAATGGTTAATAGGAACGGTTGGGGGCATTCGTATT
MagnaDeer4H	Netherlands	Capreolus capreolus		Babesia capreoli	ambiguous nucleotides	AAMTAACAATACAGGGCAATTGTCTTGTAATTGGAATGATGGTGACCTAAACCCTCACCAGAGTAACAATTGGAGGGCAAGTCTGGTGCCAGCAGCCGCGGTAATTCCAGCTCCAATAGCGTATATTAAACTTGTTGCAGTTAAAAAGCTCGTAGTTGAATTTTTGCGKGGTGTTAATATTGACTGATGTCGAGATTGCACTTCGCTTTTGGGATTTTTCCCTTTTTACTTTGAGAAAATTAGAGTGTTTCAAGCAGACTTTTGTCTTGAATACTTCAGCATGGAATAATAGAGTAGGACTTTGGTTCTATTTTGTTGGTTTGTGAACCTTAGTAATGGTTAATAGGAACGGKTGGGGGCATTCGTATT
MagnaDeer54B	Netherlands	Capreolus capreolus		Babesia capreoli	ambiguous nucleotides	AAATAWCAATACAGGGCAATTGTCTTGTAATTGGAATGATGGTGACCTAAACCCTCACCAGAGTAACAATTGGAGGGCAAGTCTGGTGCCAGCAGCCGCGGTAATTCCAGCTCCAATAGCGTATATTAAACTTGTTGCAGTTAAAAAGCTCGTAGTTGAATTTTTGCGTGGTGTTAATATTGACTGATGTCGAGATTGCAYTTCGCTTTTGGGATTTTTCCCTTTTTACTTTGAGAAAATTAGAGTGTTTCAAGCAGACTTTTGTCTTGAATACTTCAGCATGGAATAATAGAGTAGGACTTTGGTTCTATTTTGTTGGTTTGTGAACCTTAGTAATGGTTAATAGGAACGGTTGGGGGCATWCGTATT
MagnaDeer5G	Netherlands	Capreolus capreolus		Babesia capreoli	ambiguous nucleotides	AAATAWCAATACAGGGCAATTGTCTTGTAATTGGAATGATGGTGACCTAAACCCTCACCAGAGTAACAATTGGAGGGCAAGTCTGGTGCCAGCAGCCGCGGTAATTCCAGCTCCAATAGCGTATATTAAACTTGTTGCAGTTAAAAAGCTCGTAGTTGAATTTTTGCGTGGTGTTAATATTGACTGATGTCGAGATTGCACTTCGCTTTTGGGATTTTTCCCTTTTTACTTTGAGAAAATTAGAGTGTTTCAAGCAGACTTTTGTCTTGAATACTTCAGCATGGAATAATAGAGTAGGACTTTGGTTCTATTTTGTTGGTTTGTGAACCTTAGTAATGGTTAATAGGAAMGGTTGGGGGCATWCGTATT
MagnaDeer20H	Netherlands	Capreolus capreolus		Babesia capreoli	ambiguous nucleotides	TTGTCTTGTAATTGGAATGATGGTGACCTAAACCCTCACCAGAGTAACAATTGGAGGGCAAGTCTGGTGCCAGCAGCCGCGGTAATTCCAGCTCCAATAGCGTATATTAAACTTGTTGCAGTTAAAAAGCTCGTAGTTGAATTTTTGCGTGGTGTTAATATTGACTGATGTCKAKATTGCACTTCGCTTTTGGGATTTTTCCCTTTTTACTTTGAGAAAATTAGAGTGTTTCAAGCAGACTTTTGTCTTGAATACTTCAGCATGGAATAATAGAGTAGGACTTTGGTTCTATTTTGTTGGTTTGTGAACCTTAGTAATGGTTAATAGGAACGGTTGGGGGCATTCGTATT
MagnaDeer39E	Netherlands	Capreolus capreolus		Babesia capreoli	ambiguous nucleotides	TTGTCTTGTAATTGGAATGATGGTGACCTAAACCCTCACCAGAGTAACAATTGGAGGGCAAGTCTGGTGCCAGCAGCCGCGGTAATTCCAGCTCCAATAGCGTATATTAAACTTGTTGCAGTTAAAAAGCTCGTAGTTGAATTTTTGCGTGGTGTTAATATTGACTGATGTCKAKATTGCACTTCGCTTTTGGGATTTTTCCCTTTTTACTTTGAGAAAATTAGAGTGTTTCAAGCAGACTTTTGTCTTGAATACTTCAGCATGGAATAATAGAGTAGGACTTTGGTTCTATTTTGTTGGTTTGTGAACCTTAGTAATGGTTAATAGGAACGGTTGGGGGCATTCGTATT
MagnaDeer56F	Netherlands	Capreolus capreolus		Babesia capreoli	ambiguous nucleotides	TTGTCTTGTAATTGGAATGATGGTGACCTAAACCCTCACCAGAGTAACAATTGGAGGGCAAGTCTGGTGCCAGCAGCCGCGGTAATTCCAGCTCCAATAGCGTATATTAAACTTGTTGCAGTTAAAAAGCTCGTAGTTGAATTTTTGCGTGGTGTTAATATTGACTGATGTCGAGATTGCACTTCGCTTTTGGGATTTTTCCCTTTTTACTTTGAGAAAATTAKAGTGTTTCAAGCAGACTTTTGTCTTGAATACTTCAGCATGGAATAATAGAGTAGGACTTTGGTTCTATTTTGTTGGTTTGTGAACCTTARTAATGGTTAATAGGAACGGTTGGGGGCATTCGTATT
MagnaDeer35H	Netherlands	Capreolus capreolus		Babesia capreoli	ambiguous nucleotides	CAATTGTCTTGTAATTGGAATGATGGTGACCTAAACCCTCACCAGAGTAACAATTGGAGGGCAAGTCTGGTGCCAGCAGCCGCGGTAATTCCAGCTCCAATAGCGTATATTAAACTTGTTGCAGTTAAAAAGCTCGTAGTTGAATTTTTGCGTGGTGTTAATATTGACTGATGTCGAGATTGCACTTCGCTTTTGGGATTTTTCCCTTTTTACTTTGAGAAAATTAKAGTGTTTCAAGCAGACTTTTGTCTTGAATACTTCAGCATGGAATAATAGAGTAGGACTTTGGTTCTATTTTGTTGGTTTGTGAACCTTAKTAATGGTTAATAGGAACGGTTGGGGGCATTCGTATT
KF447531	Netherlands	Ixodes ricinus		Babesia capreoli	no ambiguous nucleotides	TTGTAATTGGAATGATGGTGACCTAAACCCTCACCAGAGTAACAATTGGAGGGCAAGTCTGGTGCCAGCAGCCGCGGTAATTCCAGCTCCAATAGCGTATATTAAACTTGTTGCAGTTAAAAAGCTCGTAGTTGAATTTTTGCGTGGTGTTAATATTGACTGATGTCGAGATTGCACTTCGCTTTTGGGATTTTTCCCTTTTTACTTTGAGAAAATTAGAGTGTTTCAAGCAGACTTTTGTCTTGAATACTTCAGCATGGAATAATAGAGTAGGACTTTGGTTCTATTTTGTTGGTTTGTGAACCTTAGTAATGGTTAATAAGAACGGTTGGGGGCATTCGTATT
B2 S17 73	Netherlands	Capreolus capreolus	2014	Babesia capreoli	ambiguous nucleotides	AAATAWCAATACAGGGCAATTGTCTTGTAATTGGAATGATGGTGACCTAAACCCTCACCAGAGTAACAATTGGAGGGCAAGTCTGGTGCCAGCAGCCGCGGTAATTCCAGCTCCAATAGCGTATATTAAACTTGTTGCAGTTAAAAAGCTCGTAGTTGAATTTTTGCGTGGTGTTAATATTGACTGATGTCGAGATTGCACTTCGCTTTTGGGATTTTTCCCTTTTTACTTTGAGAAAATTAGAGTGTTTCAAGCAGACTTTTGTCTTGAATACTTCAKCATGGAATAATAGAGTAGGACTTTGGTTCTATTTTGTTGGTTTGTGAACCTTARTAATGGTTAATAGGAACGGTTGGGG
MagnaDeer36F	Netherlands	Capreolus capreolus		Babesia capreoli	ambiguous nucleotides	GGAATGATGGTGACCTAAACCCTCACCAGAGTAACAATTGGAGGGCAAGTCTGGTGCCAGCAGCCGCGGTAATTCCAGCTCCAATAGCGTATATTAAACTTGTTGCAGTTAAAAAGCTCGTAGTTGAATTTTTGCGTGGTGTTAATATTGACTGATGTCGAGATTGCACTTCGCTTTTGGGATTTTTCCCTTTTTACTTTGAGAAAATTAKAGTGTTTCAAGCAGACTTTTGTCTTGAATACTTCAGCATGGAATAATAGAGTAGGACTTTGGTTCTATTTTGTTGGTTTGTGAACCTTAKTAATGGTTAATAGGAACGGTTGGGGGCATTCGTATT
MagnaDeer23H	Netherlands	Capreolus capreolus		Babesia capreoli	ambiguous nucleotides	AAATAWCMATACAGGGCAATTGTCTTGTAATTGGAATGATGGTGACCTAAACCCTCACCAGAGTAACAATTGGAGGGCAAGTCTGGTGCCAGCAGCCGCGGTAATTCCAGCTCCAATAGCGTATATTAAACTTGTTGCAGTTAAAAAGCTCGTAGTTGAATTTTTGCGTGGTGTTAATATTGACTGATGTCGAGATTGCACTTCGCTTTTGGGATTTTTCCCTTTTTACTTTGAGAAAATTAGAGTGTTTCAAGCAGACTTTTGTCTTGAATACTTCAGCATGGAATAATAGAGTAGGACTTTGGTTCTATTTTGTTGGTTTGTGAACCTTAGTAATGGTTAATAGGAACGGTKGGGGGCATWCGTATT
MagnaDeer34B	Netherlands	Capreolus capreolus		Babesia capreoli	ambiguous nucleotides	CCAATAGCGTATATTAAACTTGTTGCAGTTAAAAAGCTCGTAGTTGAATTTTTGCGKGGTGTTAATATTGACTGATGTCRAGATTGCACTTCGCTTTTGGGATTTTTCCCTTTTTACTTTGAGAAAATTAGAGTGTTTCAAGCAGACTTTTGTCTTGAATACTTCAGCATGGAATAATAGAGTAGGACTTTGGTTCTATTTTGTTGGTTTGTGAACCTTAGTAATGGTTAATAGGAACGGTTGGGGGCATTCGTATT
MagnaDeer66G	Netherlands	Capreolus capreolus		Babesia capreoli	ambiguous nucleotides	AAATAACAATACAGGGCAATTGTCTTGTAATTGGAATGATGGTGACCTAAACCCTCACCAGAGTAACAATTGGAGGGCAAGTCTGGTGCCAGCAGCCGCGGTAATTCCAGCTCCAATAGCGTATATTAAACTTGTTGCAGTTAAAAAGCTCGTAGTTGAATTTTTGCGTGGTGKTRATATTGACTGATGTCGAGATTGCACTTCGCTTTTGGGATTTTTCCCTTTTTACTTTGAGAAAATTAGAGTGTTTCAAGCAGACTTTTGTCTTGAATACTTCAGCATGGAATAATAGAGTAGGACTTTGGTTCTATTTTGTTGGTTTGTGAACCTTAGTAATGGTTAATAGGAACGGKTGGGGGCATTCGTATT
B1 S15 46	Netherlands	Capreolus capreolus	2014	Babesia capreoli	ambiguous nucleotides	AAATAACAATACAGGGCAATTGTCTTGTAATTGGAATGATGGTGACCTAAACCCTCACCAGAGTAACAATTGGAGGGCAAGTCTGGTGCCAGCAGCCGCGGTAATTCCAGCTCCAATAGCGTATATTAAACTTGTTGCAGTTAAAAAGCTCGTAGTTGAATTTTTGCGTGGTGTTAATATTGACTGATGTCGAGATTGCACTTCGCTTTTGGGATTTTTCCCTTTTTACTTTGAGAAAATTAGAGTGTTTCAAGCAGACTTTTGTCTTGAATACTTCAGCATGGAATAATAGAGTAGGACTTTGGTTCTATTTTGTTGGTTTGTGAACCTTAKTAATGGTTAATAMGAACGGTTGGGGGCATTCGYATT
B2 S13 45	Netherlands	Capreolus capreolus	2014	Babesia capreoli	ambiguous nucleotides	AAATAACAATACAGGGCAATTGTCTTRTAATTRRAATGATGGTGACCTAAACCCTCACCAGAGTAACAATTGGAGGGCAAGTCTGGTGCCAGCAGCCGCGGTAATTCCAGCTCCAATAGCGTATATTAAACTTGTTGCAGTTAAAAAGCTCGTAGTTGAATTTTTGCGTGGTGTTAATATTGACTGATGTCGAGATTGCACTTCGCTTTTGGGATTTTTCCCTTTTTACTTTGAGAAAATTAGAGTGTTTCAAGCAGACTTTTGTCTTGAATACTTCAGCATGGAATAATAGAGTAGGACTTTGGTTCTATTTTGTTGGTTTGTGAACCTTARTAATGGTTAATAGGAACGGTTGGGGGCATTCGTATT
MagnaDeer64D	Netherlands	Capreolus capreolus		Babesia capreoli	ambiguous nucleotides	AAATAACAATACAGGGCAATTGTCTTGTAATTGGAATGATGGTGACCTAAACCCTCACCAGAGTAACAATTGGAGGGCAAGTCTGGTGCCAGCAGCCGCGGTAATTCCAGCTCCAATAGCGTATATTAAACTTGTTGCAGTTAAAAAGCTCGTAGTTGAATTTTTGCKKGGTGTTAATATTGACTGATGTCGAGATTGCACTTCGCTTTTGGGATTTTTCCCTTTTTACTTTGAGAAAATTAGAGTGTTTCAAGCAGACTTTTGTCTTGAATACTTCAGCATGGAATAATAGAGTAGGACTTTGGTTCTATTTTGTTGGTTTGTGAACCTTASTAATGGTTAATAGGAACGGTTGGGGGCATTCKTATT
B2 S13 41	Netherlands	Capreolus capreolus	2014	Babesia capreoli	ambiguous nucleotides	AAATAACAATACAGGGCAATTGTNTNNTRRNNRRAATGATGGTGACCTAAACCCTCACCAGAGTAACAATTGGAGGGCAAGTCTGGTGCCAGCAGCCGCGGTAATTCCAGCTCCAATAGCGTATATTAAACTTGTTGCAGTTAAAAAGCTCGTAGTTGAATTTTTGCGTGGTGTTAATATTGACTGATGTCGAGATTGCACTTCGCTTTTGGGATTTTTCCCTTTTTACTTTGAGAAAATTAGAGTGTTTCAAGCAGACTTTTGTCTTGAATACTTCAGCATGGAATAATAGAGTAGGACTTTGGTTCTATTTTGTTGGTTTGTGAACCTTAGTAATGGTTAATAGGAACGGTTGGGG
MagnaDeer59D	Netherlands	Capreolus capreolus		Babesia capreoli	ambiguous nucleotides	AAATAWCAATACAGGGCAATTGTCTWGTAATTGGAATGATGGTGACCTAAACCCTCACCAGAGTAACAATTGGAGGGCAAGTCTGGTGCCAGCAGCCGCGGTAATTCCAGCTCCAATAGCGTATATTAAACTTGTTGCAGTTAAAAAGCTCGTAGTTGAATTTTTGCGTGGTGTTAATATTGACTGATGTCGAGATTGCAYTTCGCTTTTGGGATTTTTCCCTTTTTACTTTGAGAAAATTAGAGTGTTTCAAGCAGACTTTTGTCTTGAATACTTCAGCATGGAATAATAGAGTAGGACTTTGGTTCTATTTTGTTGGTTTGTGAACCTTAGTAATGGTTAATAGGAAMGGTTGGGGGCATWCGTATT
MagnaDeer2B	Netherlands	Capreolus capreolus		Babesia capreoli	ambiguous nucleotides	AAATAACAATACAGGGCAATTGTCTTGTAATTGGAATGATGGTGACCTAAACCCTCACCAGAGTAACAATTGGAGGGCAAGTCTGGTGCCAGCAGCCGCGGTAATTCCAGCTCCAATAGCGTATATTAAACTTGTTGCAGTTAAAAAGCTCGTAGTTGAATTTTTGCGTGGTGTTAATATTGACTGATGTCGAGATTGCACTTCGCTTTTGGGATTTTTCCCTTTTTACTTTGAGAAAATTAGAGTGTTTCAAGCAGACTTTTGTCTTGAATACTTCAGCATGGAATAATAGAGTAGGACTTTGGTTCTATTTTGTTGGTTTGTGAACCTTAGTATTGGTTAATAGGAACGSTTGSGGGCATTCGTATT
B1 S13 22	Netherlands	Capreolus capreolus	2014	Babesia capreoli	ambiguous nucleotides	AAATAACAATACAGGGCAATTGTCTTGTAATTGGAATGATGGTGACCTAAACCCTCACCAGAGTAACAATTGGAGGGCAAGTCTGGTGCCAGCAGCCGCGGTAATTCCAGCTCCAATAGCGTATATTAAACTTGTTGCAGTTAAAAAGCTCGTAGTTGAATTTTTGCGTGGTGTTAATATTGACTGATGTCGAGATTGCACTTCGCTTTTGGGATTTTTCCCTTTTTACTTTGAGAAAATTAGAGTGTTTCAAGCAGACTTTTGTCTTGAATACTTCAGCATGGAATAATAGAGTAGGACTTTGGTTCTATTTTGTTGGTTTGTGAACCTTAMTAATGGTTAATASGAAMGGTTGGG
BelgieWIV296	Belgium	Ixodes ricinus	2017	Babesia divergens	no ambiguous nucleotides	AAATAACAATACAGGGCAATTGTCTTGTAATTGGAATGATGGTGACCTAAACCCTCACCAGAGTAACAATTGGAGGGCAAGTCTGGTGCCAGCAGCCGCGGTAATTCCAGCTCCAATAGCGTATATTAAACTTGTTGCAGTTAAAAAGCTCGTAGTTGAATTTTTGCGTGGTGTTAATATTGACTAATGTCGAGATTGCACTTCGCTTTTGGGATTTATCCCTTTTTACTTTGAGAAAATTAGAGTGTTTCAAGCAGACTTTTGTCTTGAATACTTCAGCATGGAATAATAGAGTAGGACTTTGGTTCTATTTTGTTGGTTTGTGAACCTTAGTAATGGTTAATAGGAACGGTTGGGGGCATTCGTATT
BelgieWIV538	Belgium	Ixodes ricinus	2017	Babesia divergens	no ambiguous nucleotides	AAATAACAATACAGGGCAATTGTCTTGTAATTGGAATGATGGTGACCTAAACCCTCACCAGAGTAACAATTGGAGGGCAAGTCTGGTGCCAGCAGCCGCGGTAATTCCAGCTCCAATAGCGTATATTAAACTTGTTGCAGTTAAAAAGCTCGTAGTTGAATTTTTGCGTGGTGTTAATATTGACTAATGTCGAGATTGCACTTCGCTTTTGGGATTTATCCCTTTTTACTTTGAGAAAATTAGAGTGTTTCAAGCAGACTTTTGTCTTGAATACTTCAGCATGGAATAATAGAGTAGGACTTTGGTTCTATTTTGTTGGTTTGTGAACCTTAGTAATGGTTAATAGGAACGGTTGGGGGCATTCGTATT
E37	Netherlands	Cervus elaphus	2019	Babesia divergens		AAATAACAATACAGGGCAATTGTCTTGTAATTGGAATGATGGTGACCTAAACCCTCACCAGAGTAACAATTGGAGGGCAAGTCTGGTGCCAGCAGCCGCGGTAATTCCAGCTCCAATAGCGTATATTAAACTTGTTGCAGTTAAAAAGCTCGTAGTTGAATTTTTGCGTGGTGTTAATATTGACTAATGTCGAGATTGCACTTCGCTTTTGGGATTTATCCCTTTTTACTTTGAGAAAATTAGAGTGTTTCAAGCAGACTTTTGTCTTGAATACTTCAGCATGGAATAATAGAGTAGGACTTTGGTTCTATTTTGTTGGTTTGTGAACCTTAGTAATGGTTAATAGGAACGGTTGGGGGCATTCGTATT
Edelhert3130522003	Netherlands	Cervus elaphus		Babesia divergens		AAATAACAATACAGGGCAATTGTCTTGTAATTGGAATGATGGTGACCTAAACCCTCACCAGAGTAACAATTGGAGGGCAAGTCTGGTGCCAGCAGCCGCGGTAATTCCAGCTCCAATAGCGTATATTAAACTTGTTGCAGTTAAAAAGCTCGTAGTTGAATTTTTGCGTGGTGTTAATATTGACTAATGTCGAGATTGCACTTCGCTTTTGGGATTTATCCCTTTTTACTTTGAGAAAATTAGAGTGTTTCAAGCAGACTTTTGTCTTGAATACTTCAGCATGGAATAATAGAGTAGGACTTTGGTTCTATTTTGTTGGTTTGTGAACCTTAGTAATGGTTAATAGGAACGGTTGGGGGCATTCGTATT
Edelhert3171103011	Netherlands	Cervus elaphus		Babesia divergens		AAATAACAATACAGGGCAATTGTCTTGTAATTGGAATGATGGTGACCTAAACCCTCACCAGAGTAACAATTGGAGGGCAAGTCTGGTGCCAGCAGCCGCGGTAATTCCAGCTCCAATAGCGTATATTAAACTTGTTGCAGTTAAAAAGCTCGTAGTTGAATTTTTGCGTGGTGTTAATATTGACTAATGTCGAGATTGCACTTCGCTTTTGGGATTTATCCCTTTTTACTTTGAGAAAATTAGAGTGTTTCAAGCAGACTTTTGTCTTGAATACTTCAGCATGGAATAATAGAGTAGGACTTTGGTTCTATTTTGTTGGTTTGTGAACCTTAGTAATGGTTAATAGGAACGGTTGGGGGCATTCGTATT
RJ2025	Netherlands	Ixodes ricinus	2013	Babesia divergens	no ambiguous nucleotides	AAATAACAATACAGGGCAATTGTCTTGTAATTGGAATGATGGTGACCTAAACCCTCACCAGAGTAACAATTGGAGGGCAAGTCTGGTGCCAGCAGCCGCGGTAATTCCAGCTCCAATAGCGTATATTAAACTTGTTGCAGTTAAAAAGCTCGTAGTTGAATTTTTGCGTGGTGTTAATATTGACTAATGTCGAGATTGCACTTCGCTTTTGGGATTTATCCCTTTTTACTTTGAGAAAATTAGAGTGTTTCAAGCAGACTTTTGTCTTGAATACTTCAGCATGGAATAATAGAGTAGGACTTTGGTTCTATTTTGTTGGTTTGTGAACCTTAGTAATGGTTAATAGGAACGGTTGGGGGCATTCGTATT
WisentNeline	Netherlands	Bison Bonasus		Babesia divergens		AAATAACAATACAGGGCAATTGTCTTGTAATTGGAATGATGGTGACCTAAACCCTCACCAGAGTAACAATTGGAGGGCAAGTCTGGTGCCAGCAGCCGCGGTAATTCCAGCTCCAATAGCGTATATTAAACTTGTTGCAGTTAAAAAGCTCGTAGTTGAATTTTTGCGTGGTGTTAATATTGACTAATGTCGAGATTGCACTTCGCTTTTGGGATTTATCCCTTTTTACTTTGAGAAAATTAGAGTGTTTCAAGCAGACTTTTGTCTTGAATACTTCAGCATGGAATAATAGAGTAGGACTTTGGTTCTATTTTGTTGGTTTGTGAACCTTAGTAATGGTTAATAGGAACGGTTGGGGGCATTCGTATT
WisentNelson	Netherlands	Bison Bonasus		Babesia divergens		AAATAACAATACAGGGCAATTGTCTTGTAATTGGAATGATGGTGACCTAAACCCTCACCAGAGTAACAATTGGAGGGCAAGTCTGGTGCCAGCAGCCGCGGTAATTCCAGCTCCAATAGCGTATATTAAACTTGTTGCAGTTAAAAAGCTCGTAGTTGAATTTTTGCGTGGTGTTAATATTGACTAATGTCGAGATTGCACTTCGCTTTTGGGATTTATCCCTTTTTACTTTGAGAAAATTAGAGTGTTTCAAGCAGACTTTTGTCTTGAATACTTCAGCATGGAATAATAGAGTAGGACTTTGGTTCTATTTTGTTGGTTTGTGAACCTTAGTAATGGTTAATAGGAACGGTTGGGGGCATTCGTATT
RJ2281	Netherlands	Ixodes ricinus	2013	Babesia divergens	no ambiguous nucleotides	AAATAACAATACAGGGCAATTGTCTTGTAATTGGAATGATGGTGACCTAAACCCTCACCAGAGTAACAATTGGAGGGCAAGTCTGGTGCCAGCAGCCGCGGTAATTCCAGCTCCAATAGCGTATATTAAACTTGTTGCAGTTAAAAAGCTCGTAGTTGAATTTTTGCGTGGTGTTAATATTGACTAATGTCGAGATTGCACTTCGCTTTTGGGATTTATCCCTTTTTACTTTGAGAAAATTAGAGTGTTTCAAGCAGACTTTTGTCTTGAATACTTCAGCATGGAATAATAGAGTAGGACTTTGGTTCTATTTTGTTGGTTTGTGAACCTTAGTAATGGTTAATAGGAACGGTTGGGGGCATTCGTATT
VDMC_Edelhert_HogeVeluwe	Netherlands	Cervus elaphus		Babesia divergens		AATTGGAGGGCAAGTCTGGTGCCAGCAGCCGCGGTAATTCCAGCTCCAATAGCGTATATTAAACTTGTTGCAGTTAAAAAGCTCGTAGTTGAATTTTTGCGTGGTGTTAATATTGACTAATGTCGAGATTGCACTTCGCTTTTGGGATTTATCCCTTTTTACTTTGAGAAAATTAGAGTGTTTCAAGCAGACTTTTGTCTTGAATACTTCAGCATGGAATAATAGAGTAGGACTTTGGTTCTATTTT
EH83KD	Netherlands	Cervus elaphus		Babesia divergens		ATTGGAATGATGGTGACCTAAACCCTCACCAGAGTAACAATTGGAGGGCAAGTCTGGTGCCAGCAGCCGCGGTAATTCCAGCTCCAATAGCGTATATTAAACTTGTTGCAGTTAAAAAGCTCGTAGTTGAATTTTTGCGTGGTGTTAATATTGACTAATGTCGAGATTGCACTTCGCTTTTGGGATTTATCCCTTTTTACTTTGAGAAAATTAGAGTGTTTCAAGCAGACTTTTGTCTTGAATACTTCAGCATGGAATAATAGAGTAGGACTTTGGTTCTATTTTGTTGGTTTGTGAACCTTAGTAAT
EH82KD	Netherlands	Cervus elaphus		Babesia divergens		AAATAACAATACAGGGCAATTGTCTTGTAATTGGAATGATGGTGACCTAAACCCTCACCAGAGTAACAATTGGAGGGCAAGTCTGGTGCCAGCAGCCGCGGTAATTCCAGCTCCAATAGCGTATATTAAACTTGTTGCAGTTAAAAAGCTCGTAGTTGAATTTTTGCGTGGTGTTAATATTGACTAATGTCGAGATTGCACTTCGCTTTTGGGATTTATCCCTTTTTACTTTGAGAAAATTAGAGTGTTTCAAGCAGACTTTTGTCTTGAATACTTCAGCATGGAATAATAGAGTAGGACTTTGGTTCTATTTTGTTGGTTTGTGAACCTTAGTAATGGTTAATAGGAACGGTTGGGGGCATTCGTATT
EH81KD	Netherlands	Cervus elaphus		Babesia divergens		ATTGGAATGATGGTGACCTAAACCCTCACCAGAGTAACAATTGGAGGGCAAGTCTGGTGCCAGCAGCCGCGGTAATTCCAGCTCCAATAGCGTATATTAAACTTGTTGCAGTTAAAAAGCTCGTAGTTGAATTTTTGCGTGGTGTTAATATTGACTAATGTCGAGATTGCACTTCGCTTTTGGGATTTATCCCTTTTTACTTTGAGAAAATTAGAGTGTTTCAAGCAGACTTTTGTCTTGAATACTTCAGCATGGAATAATAGAGTAGGACTTTGGTTCTATTTTGTTGGTTTGTGAACCTTAGTA
EH24305	Netherlands	Cervus elaphus		Babesia divergens		AATAACAATACAGGGCAATTGTCTTGTAATTGGAATGATGGTGACCTAAACCCTCACCAGAGTAACAATTGGAGGGCAAGTCTGGTGCCAGCAGCCGCGGTAATTCCAGCTCCAATAGCGTATATTAAACTTGTTGCAGTTAAAAAGCTCGTAGTTGAATTTTTGCGTGGTGTTAATATTGACTAATGTCGAGATTGCACTTCGCTTTTGGGATTTATCCCTTTTTACTTTGAGAAAATTAGAGTGTTTCAAGCAGACTTTTGTCTTGAATACTTCAGCATGGAATAATAGAGTAGGACTTTGGTTCTATTTTGTTGGTTTGTGAACCTTAGTAATGGTTAATAGGAACGGTTGGGGGCATTCGTATTT
EH24748	Netherlands	Cervus elaphus		Babesia divergens		AAATAACAATACAGGGCAATTGTCTTGTAATTGGAATGATGGTGACCTAAACCCTCACCAGAGTAACAATTGGAGGGCAAGTCTGGTGCCAGCAGCCGCGGTAATTCCAGCTCCAATAGCGTATATTAAACTTGTTGCAGTTAAAAAGCTCGTAGTTGAATTTTTGCGTGGTGTTAATATTGACTAATGTCGAGATTGCACTTCGCTTTTGGGATTTATCCCTTTTTACTTTGAGAAAATTAGAGTGTTTCAAGCAGACTTTTGTCTTGAATACTTCAGCATGGAATAATAGAGTAGGACTTTGGTTCTATTTTGTTGGTTTGTGAACCTTAGTAATGGTTAATAGGAACGGTTGGGGGCATTCGTATT
EH24813	Netherlands	Cervus elaphus		Babesia divergens		AAATAACAATACAGGGCAATTGTCTTGTAATTGGAATGATGGTGACCTAAACCCTCACCAGAGTAACAATTGGAGGGCAAGTCTGGTGCCAGCAGCCGCGGTAATTCCAGCTCCAATAGCGTATATTAAACTTGTTGCAGTTAAAAAGCTCGTAGTTGAATTTTTGCGTGGTGTTAATATTGACTAATGTCGAGATTGCACTTCGCTTTTGGGATTTATCCCTTTTTACTTTGAGAAAATTAGAGTGTTTCAAGCAGACTTTTGTCTTGAATACTTCAGCATGGAATAATAGAGTAGGACTTTGGTTCTATTTTGTTGGTTTGTGAACCTTAGTAATGGTTAATAGGAACGGTTGGGGGCATTCGTATT
EH24675	Netherlands	Cervus elaphus		Babesia divergens		AAATAACAATACAGGGCAATTGTCTTGTAATTGGAATGATGGTGACCTAAACCCTCACCAGAGTAACAATTGGAGGGCAAGTCTGGTGCCAGCAGCCGCGGTAATTCCAGCTCCAATAGCGTATATTAAACTTGTTGCAGTTAAAAAGCTCGTAGTTGAATTTTTGCGTGGTGTTAATATTGACTAATGTCGAGATTGCACTTCGCTTTTGGGATTTATCCCTTTTTACTTTGAGAAAATTAGAGTGTTTCAAGCAGACTTTTGTCTTGAATACTTCAGCATGGAATAATAGAGTAGGACTTTGGTTCTATTTTGTTGGTTTGTGAACCTTAGTAATGGTTAATAGGAACGGTTGGGGGCATTCGTATT
EH10RK	Netherlands	Cervus elaphus		Babesia divergens		TGTCTTGTAATTGGAATGATGGTGACCTAAACCCTCACCAGAGTAACAATTGGAGGGCAAGTCTGGTGCCAGCAGCCGCGGTAATTCCAGCTCCAATAGCGTATATTAAACTTGTTGCAGTTAAAAAGCTCGTAGTTGAATTTTTGCGTGGTGTTAATATTGACTAATGTCGAGATTGCACTTCGCTTTTGGGATTTATCCCTTTTTACTTTGAGAAAATTAGAGTGTTTCAAGCAGACTTTTGT
EH4RK	Netherlands	Cervus elaphus		Babesia divergens		AAATAACAATACAGGGCAATTGTCTTGTAATTGGAATGATGGTGACCTAAACCCTCACCAGAGTAACAATTGGAGGGCAAGTCTGGTGCCAGCAGCCGCGGTAATTCCAGCTCCAATAGCGTATATTAAACTTGTTGCAGTTAAAAAGCTCGTAGTTGAATTTTTGCGTGGTGTTAATATTGACTAATGTCGAGATTGCACTTCGCTTTTGGGATTTATCCCTTTTTACTTTGAGAAAATTAGAGTGTTTCAAGCAGACTTTTGTCTTGAATACTTCAGCATGGAATAATAGAGTAGGACTTTGGTTCTATTTTGTTGGTTTGTGAACCTTAGTAATGGTTAATAGGAACGGTTGGGGGCATTCGTATT
EH1RK	Netherlands	Cervus elaphus		Babesia divergens		AAATAACAATACAGGGCAATTGTCTTGTAATTGGAATGATGGTGACCTAAACCCTCACCAGAGTAACAATTGGAGGGCAAGTCTGGTGCCAGCAGCCGCGGTAATTCCAGCTCCAATAGCGTATATTAAACTTGTTGCAGTTAAAAAGCTCGTAGTTGAATTTTTGCGTGGTGTTAATATTGACTAATGTCGAGATTGCACTTCGCTTTTGGGATTTATCCCTTTTTACTTTGAGAAAATTAGAGTGTTTCAAGCAGACTTTTGTCTTGAATACTTCAGCATGGAATAATAGAGTAGGACTTTGGTTCTATTTTGTTGGTTTGTGAACCTTAGTAATGGTTAATAGGAACGGTTGGGGGCATTCGTATT
EH84KD	Netherlands	Cervus elaphus		Babesia divergens		AAATAACAATACAGGGCAATTGTCTTGTAATTGGAATGATGGTGACCTAAACCCTCACCAGAGTAACAATTGGAGGGCAAGTCTGGTGCCAGCAGCCGCGGTAATTCCAGCTCCAATAGCGTATATTAAACTTGTTGCAGTTAAAAAGCTCGTAGTTGAATTTTTGCGTGGTGTTAATATTGACTAATGTCGAGATTGCACTTCGCTTTTGGGATTTATCCCTTTTTACTTTGAGAAAATTAGAGTGTTTCAAGCAGACTTTTGTCTTGAATACTTCAGCATGGAATAATAGAGTAGGACTTTGGTTCTATTTTGTTGGTTTGTGAACCTTAGTAATGGTTAATAGGAACGGTTGGGGGCATTCGTATT
EH76KD	Netherlands	Cervus elaphus		Babesia divergens		AAATAACAATACAGGGCAATTGTCTTGTAATTGGAATGATGGTGACCTAAACCCTCACCAGAGTAACAATTGGAGGGCAAGTCTGGTGCCAGCAGCCGCGGTAATTCCAGCTCCAATAGCGTATATTAAACTTGTTGCAGTTAAAAAGCTCGTAGTTGAATTTTTGCGTGGTGTTAATATTGACTAATGTCGAGATTGCACTTCGCTTTTGGGATTTATCCCTTTTTACTTTGAGAAAATTAGAGTGTTTCAAGCAGACTTTTGTCTTGAATACTTCAGCATGGAATAATAGAGTAGGACTTTGGTTCTATTTTGTTGGTTTGTGAACCTTAGTAATGGTTAATAGGAACGGTTGGGGGCATTCGTATT
EH24214	Netherlands	Cervus elaphus		Babesia divergens		ATTGGAATGATGGTGACCTAAACCCTCACCAGAGTAACAATTGGAGGGCAAGTCTGGTGCCAGCAGCCGCGGTAATTCCAGCTCCAATAGCGTATATTAAACTTGTTGCAGTTAAAAAGCTCGTAGTTGAATTTTTGCGTGGTGTTAATATTGACTAATGTCGAGATTGCACTTCGCTTTTGGGATTTATCCCTTTTTACTTTGAGAAAATTAGAGTGTTTCAAGCAGACTTTTGTCTTGAATACTTCAGCATGGAATAATAGAGTAGGACTTTGGTTCTATTTTGTTGGTTTGTGAACCTTAGTA
EH24669	Netherlands	Cervus elaphus		Babesia divergens		GTAATTGGAATGATGGTGACCTAAACCCTCACCAGAGTAACAATTGGAGGGCAAGTCTGGTGCCAGCAGCCGCGGTAATTCCAGCTCCAATAGCGTATATTAAACTTGTTGCAGTTAAAAAGCTCGTAGTTGAATTTTTGCGTGGTGTTAATATTGACTAATGTCGAGATTGCACTTCGCTTTTGGGATTTATCCCTTTTTACTTTGAGAAAATTAGAGTGTTTCAAGCAGACTTTTGTCTTGAATACTTCAGCATGGAATAATAGAGTAGGACTTTGGTTCTATTTTGTTGGTTTGTGAACCTTAGTAATGGTTAATA
EH-1-RK	Netherlands	Cervus elaphus		Babesia divergens		AAATAACAATACAGGGCAATTGTCTTGTAATTGGAATGATGGTGACCTAAACCCTCACCAGAGTAACAATTGGAGGGCAAGTCTGGTGCCAGCAGCCGCGGTAATTCCAGCTCCAATAGCGTATATTAAACTTGTTGCAGTTAAAAAGCTCGTAGTTGAATTTTTGCGTGGTGTTAATATTGACTAATGTCGAGATTGCACTTCGCTTTTGGGATTTATCCCTTTTTACTTTGAGAAAATTAGAGTGTTTCAAGCAGACTTTTGTCTTGAATACTTCAGCATGGAATAATAGAGTAGGACTTTGGTTCTATTTTGTTGGTTTGTGAACCTTAGTAATGGTTAATAGGAACGGTTGGGGGCATTCGTATT
EH24765	Netherlands	Cervus elaphus		Babesia divergens		ATTGGAATGATGGTGACCTAAACCCTCACCAGAGTAACAATTGGAGGGCAAGTCTGGTGCCAGCAGCCGCGGTAATTCCAGCTCCAATAGCGTATATTAAACTTGTTGCAGTTAAAAAGCTCGTAGTTGAATTTTTGCGTGGTGTTAATATTGACTAATGTCGAGATTGCACTTCGCTTTTGGGATTTATCCCTTTTTACTTTGAGAAAATTAGAGTGTTTCAAGCAGACTTTTGTCTTGAATACTTCAGCATGGAATAATAGAGTAGGACTTTGGTTCTATTTTGTTGGTTTGKGAACCTTAGTAATGGTTAATAGGAACGGTTGGGGGCATTCGTATT
EH83850	Netherlands	Cervus elaphus		Babesia divergens		TGGAATGATGGTGACCTAAACCCTCACCAGAGTAACAATTGGAGGGCAAGTCTGGTGCCAGCAGCCGCGGTAATTCCAGCTCCAATAGCGTATATTAAACTTGTTGCAGTTAAAAAGCTCGTAGTTGAATTTTTGCGTGGTGTTAATATTGACTAATGTCGAGATTGCACTTCGCTTTTGGGATTTATCCCTTTTTACTTTGAGAAAATTAGAGTGTTTCAAGCAGACTTTTGTCTTGAATACTTCAGCATGGAATAATAGAGTAGGACTTTGGTTCTATTTTGTTGGTTTGKGAACCTTAGTAATGGTTAATAGGAACGGTTGGGGGCATTCGTATT
EH23876	Netherlands	Cervus elaphus		Babesia divergens		ATTGGAATGATGGTGACCTAAACCCTCACCAGAGTAACAATTGGAGGGCAAGTCTGGTGCCAGCAGCCGCGGTAATTCCAGCTCCAATAGCGTATATTAAACTTGTTGCAGTTAAAAAGCTCGTAGTTGAATTTTTGCGTGGTGTTAATATTGACTAATGTCGAGATTGCACTTCGCTTTTGGGATTTATCCCTTTTTACTTTGAGAAAATTAGAGTGTTTCAAGCAGACTTTTGTCTTGAATACTTCAGCATGGAATAATAGAGTAGGACTTTGGTTCTATTTTGTTGGTTTGKGAACCTTAGTAATGGTTAATAGGAACGGTTGGGGGCATTCGTATT
EH24762	Netherlands	Cervus elaphus		Babesia divergens		TGTCTTGTAATTGGAATGATGGTGACCTAAACCCTCACCAGAGTAACAATTGGAGGGCAAGTCTGGTGCCAGCAGCCGCGGTAATTCCAGCTCCAATAGCGTATATTAAACTTGTTGCAGTTAAAAAGCTCGTAGTTGAATTTTTGCGTGGTGTTAATATTGACTAATGTCGAGATTGCACTTCGCTTTTGGGATTTATCCCTTTTTACTTTGAGAAAATTAGAGTGTTTCAAGCAGACTTTTGTCTTGAATACTTCAGCATGGAATAATAGAGTAGGACTTTGGTTCTATTTTGTTGGTTTGKGAACCTTAGTAATGGTTAATAGGAACGGTTGGGGGCATTCGTATT
15652	Netherlands	Ovis aries		Babesia divergens	ambiguous nucleotides	AAATAACAATACAGGGCAATTGTCTTGTAATTGGAATGATGGTGACCTAAACCCTCACCAGAGTAACAATTGGAGGGCAAGTCTGGTGCCAGCAGCCGCGGTAATTCCAGCTCCAATAGCGTATATTAAACTTGTTGCAGTTAAAAAGCTCGTAGTTGAATTTTTGCGTGGTGTTAATATTGACTAATGTCGAGRTTGCACTTCGCTTTTGGGATTTATCCCTTTTTACTTTGAGAAAATTAGAGTGTTTCAAGCAGACTTTTGTCTTGAATACTTCAGCATGGAATAATAGAGTAGGACTTTGGTTCTATTTTGTTGGTTTGTGAACCTTAGTAATGGTTAATAGGAACGGTTGGGGGCATTCGTATT
E4	Netherlands	Cervus elaphus	2019	Babesia divergens		AAATAACAATMCAGGGCAATTGTCTTGTAATTGGAATGATGGTGACCTAAACCCTCACCAGAGTAACAATTGGAGGGCAAGTCTGGTGCCAGCAGCCGCGGTAATTCCAGCTCCAATAGCGTATATTAAACTTGTTGCAGTTAAAAAGCTCGTAGTTGAATTTTTGCGTGGTGTTAATATTGACTAATGTCGAGATTGCACTTCGCTTTTGGGATTTATCCCTTTTTACTTTGAGAAAATTAGAGTGTTTCAAGCAGACTTTTGTCTTGAATACTTCAGCATGGAATAATAGAGTAGGACTTTGGTTCTATTTTGTTGGTTTGKGAACCTTAGTAATGGTTAATAGGAACGGTTGGGGGCATTCGTATT
EH24768	Netherlands	Cervus elaphus		Babesia divergens		AAATAACAATACAGGGCAATTGTCTTGTAATTGGAATGATGGTGACCTAAACCCTCACCAGAGTAACAATTGGAGGGCAAGTCTGGTGCCAGCAGCCGCGGTAATTCCAGCTCCAATAGCGTATATTAAACTTGTTGCAGTTAAAAAGCTCGTAGTTGAATTTTTGCGTGGTGTTAATATTGACTAATGTCGAGATTGCACTTCGCTTTTGGGATTTATCCCTTTTTACTTTGAGAAAATTAGAGTGTTTCAAGCAGACTTTTGTCTTGAATACTTCAGCATGGAATAATAGAGTAGGACTTTGGTTCTATTTTGTTGGTTTGTGAACCTTAKTAATGGTTAATAGGAACGGTTGGGGGCATWCGTATT
Edelhert3180815001	Netherlands	Cervus elaphus		Babesia divergens		AAATAACAATACAGGGCAATTGTCTTGTAATTGGAATGATGGTGACCTAAACCCTCACCAGAGTAACAATTGGAGGGCAAGTCTGGTGCCAGCAGCCGCGGTAATTCCAGCTCCAATAGCGTATATTAAACTTGTTGCAGTTAAAAAGCTCGTAGTTGAATTTTTGCGTGGTGTTAATATTGACTAATGTCGAGGTTGCACTTCGCTTTTGGGATTTATCCCTTTTTACTTTGAGAAAATTAGAGTGTTTCAAGCAGACTTTTGTCTTGAATACTTCAGCATGGAATAATAGAGTAGGACTTTGGTTCTATTTTGTTGGTTTGTGAACCTTAGTAATGGTTAATAGGAACGGTTGGGGGCATTCGTATT
Ooi15573B2019	Netherlands	Ovis aries		Babesia divergens		AAATAACAATACAGGGCAATTGTCTTGTAATTGGAATGATGGTGACCTAAACCCTCACCAGAGTAACAATTGGAGGGCAAGTCTGGTGCCAGCAGCCGCGGTAATTCCAGCTCCAATAGCGTATATTAAACTTGTTGCAGTTAAAAAGCTCGTAGTTGAATTTTTGCGTGGTGTTAATATTGACTAATGTCGAGGTTGCACTTCGCTTTTGGGATTTATCCCTTTTTACTTTGAGAAAATTAGAGTGTTTCAAGCAGACTTTTGTCTTGAATACTTCAGCATGGAATAATAGAGTAGGACTTTGGTTCTATTTTGTTGGTTTGTGAACCTTAGTAATGGTTAATAGGAACGGTTGGGGGCATTCGTATT
MagnaDeer56E	Netherlands	Capreolus capreolus		Babesia capreoli	ambiguous nucleotides	GTAACAATTGGAGGGCAAGTCTGGTGCCAGCAGCCGCGGTAATTCCAGCTCCMATAGCGTATATTAAACTTGTTGCAGTTAAAAAGCTCGYASTTGAATTTTTGCGTGGTGTTAATATTGACTGATGTCGAGATTGCACTTCGCTTTTGGGATTTTTCCCTTTTTACTTTGAGAAAATTAGAGTGTTTCAAGCAGACTTTTGTCTTGAATACTTCAGCATGGAATAATAGAGTAGGACTTTGGTTCTATTTTGTTGGTTTGTGAACCTTASTAATGGTTAATAGGAACGGTTGGGGGCATTCGTATT
MagnaDeer16A	Netherlands	Capreolus capreolus		Babesia capreoli	ambiguous nucleotides	AAATAWCAATACAGGGCAATTGTCTWGTAATWGGAATGATGGTGACCTAAMCCCTCACCAGAGTAACAATTGGAGGGCAAGTCTGGTGCCAGCAGCCGCGGTAATTCCAGCTCCAATAGCGTATATTAAACTTGTTGCAGTTAAAAAGCTCGTAGTTGAATTTTTGCGTGGTGTTAATATTGACTGATGTCGAGATTGCACTTCGCTTTTGGGATTTTTCCCTTTTTACTTTGAGAAAATTAGAGTGTTTCAAGCAGACTTTTGTCTTGAATACTTCAGCATGGAATAATAGAGTAGGACTTTGGTTCTATTTTGTTGGTTTGTGAACCTTAKTAATGGTTAATAGGAAMGGTTGGGGGCATTCGTATT
MagnaDeer10A	Netherlands	Capreolus capreolus		Babesia capreoli	ambiguous nucleotides	AAATAWCAATACAGGGCAATTGTCTTGTAATTGGAATGATGGTGACCTAAACCCTCACCAGAGTAACAATTGGAGGGCAAGTCTGGTGCCAGCAGCCGCGGTAATTCCAGCTCCAATAGCGTATATTAAACTTGTTGCAGTTAAAAAGCTCGTAGTTGAATTTTTGCGTGGTGTTAATATTGACTGATGTCGAGATTGCACTTCGCTTTTGGGATTTTTCCCTTTTTACTTTGAGAAAATTAGAGTGTTTCAAGCAGACTTTTGTCTTGAATACTTCAGCATGGAATAATAGAGTAGGACTTTGGWTCTATTTTGTTGGTTTGTGAACCTTAKWAATGGTTAATAGGAACGGTTGGGGKCATWCGTATT
B2 S19 Fons 7	Netherlands	Capreolus capreolus	2014	Babesia capreoli	ambiguous nucleotides	AAATAACAATACAGGGCAATTGTCTTGTAATTGGAATGATGGTGACCTAAACCCTCACCAGAGTAACAATTGGAGGGCAAGTCTGGTGCCAGCAGCCGCGGTAATTCCAGCTCCAATAGCGTATATTAAACTTGTTGCAGTTAAAAAGCTCGTAGTTGAATTTTTGCGTGGTGTTAATATTGACTGATGTCGAGATTGCACTTCGCTTTTGGGATTTTTCCCTTTTTACTTTGAGAAAATTAGAGTGTTTCAAGCAGACTTTTGTCTTGAATACTTCAGCATGGAATAATAGAGTAGGACTTTGGYTCTATTTTGTTGGTTTGTGAACCTTAKTAATGGTTAATARGAACGGTTGGGGRCATTCKTATY
MagnaDeer45B	Netherlands	Capreolus capreolus		Babesia capreoli		AAATAACAATACAGGGCAATTGTCTYGTAATTGGAATGATGGTGACCTAAACCCTCACCWGAGTAACAATTGGAGGGCAAGTCTGGTGCCAGCAGCCGCGGTAATTCCWSCTCCAATAGCGTATATTAAACTTGTTGCAGTTAAAAAGCTCGTAGTTGAATTTTTGCGTGGTGTTAATATTGACTGATGTCGAGATTGCACTTCGCTTTTGGGATTTTTCCCTTTTTACTTTGAGAAAATTAGAGTGTTTCAAGCAGACTTTTGTCTTGAATACTTCAGCATGGAATAATARAGTAGGACTTTGGTTCTATTTTGTTGGTTTGTGAACCTTATTAATGGTTAATAGGAACGGTTGGGGGCATTCGTATT
MagnaDeer19G	Netherlands	Capreolus capreolus		Babesia capreoli	ambiguous nucleotides	AAATAACAATMCAGGGCAATTGTCYWGTAATTGGAATGATGGTGACCTAAACCCTCACCAGAGTAACAATTGGAGGGCAAGTCTGGTGCCAGCAGCCGCGGTAATTCCAGCTCCAATAGCGTATATTAAACTTGTTGCAGTTAAAAAGCTCGTAGTTGAATTTTTGCGWGGKGTTAATATTGACTGATGTCGAGATTGCACTTCGCTTTTGGGATTTTTCCCTTTTTACTTTGAGAAAATTAGAGTGTTTCAAGCAGACTTTTGTCTTGAATACTTCAGCATGGAATAATAGAGTAGGACTTTGGTTCTATTTTGTTGGTTTGTGAACCTTAGTAATGGWTAAKAGGAACGGKTGGGGGCATTCGTATT
B3 S10 20	Netherlands	Capreolus capreolus	2014	Babesia capreoli	ambiguous nucleotides	AAATAACAATACAGGGCAATTGTYTWGTAATTGGAATGATGGTGACCTAAACCCTCACCAGRGTAACAATTGGAGGGCAAGTCTGGTGCCAGCAGCCGCGGTAATTCCAGCTCCAATAGCGTATATTAAACTTGTTGCAGTTAAAAAGCTCGTAGTTGAATTTTTGCGTGGTGTTAATATTGACTGATGTCGAGATTGCACTTCGCTTTTGGGATTTTTCCCTTTTTACTTTGAGAAAATTAGAGTGTTTCAAGCAGACTTTTGTCTTGAATACTTCWGCATGGAATAATAGAGTARGACTTTGGTTCTATTTTGTTGGTTTGTGAACCTTAKYAATGGTTAATAGGAACGGTTGGGGGCATTCKTATT
MagnaDeer66H	Netherlands	Capreolus capreolus		Babesia capreoli	ambiguous nucleotides	CGCGGTAATTCCAGCTCCAATAGCGTATATTAAACTTGTTGCAGTTAAAAAGCTCGTAGTTGAATTTTYGCGTGGTGTTWATAYTGACTGATGTCGAGATTGCACTTCGCTTTTGGGATTTTTCCCTTTTTACTTTGAGAAAATTAGAGTGTTTCAAGCAGACT
MagnaDeer17B	Netherlands	Capreolus capreolus		Babesia capreoli	ambiguous nucleotides	AAATAWCAATMCAGGGCAATTGTCYWGTAATTGGAATGATGGYGACMTAAACCCTCACCAGAGTARCAATTGGAGGGCAAGTCTGGTGCCAGCAGCCGCGGTAATTCCAGCTCCAATAGCGTATATTAAACTTGTTGCAGTTAAAAAGCTCGTAGTTGAATTTTTGCGTGGTGTTAATATTGACTGATGTCGAGATTGCACTTCGCTTTTGGGATTTTTCCCTTTTTACTTTGAGAAAATTAGAGTGTTTCAAGCAGACTTTTGTCTTGAATACTTCAGCATGGAATAATAGAGTAGGACTTTGGTTCTATTTTGTTGGTTTGTGAACCTTAGTAATGGTTAATASGAACGGKTGGGGGCWTTCGTATT
B2 S18 Fons 3	Netherlands	Capreolus capreolus	2014	Babesia capreoli	ambiguous nucleotides	AAATAACAATACAGGGCAATTGTCTTGTAATTGGAATGATGGTGACCTAAACCCTCACCAGAGTAACAATTGGAGGGCAAGTCTGGTGCCAGCAGCCGCGGTAATTCCAGCTCCAATAGCGTATATTAAACTTGTTGCAGTTAAAAAGCTCGTAGTTGAATTTTTGCGTGGTGTTAATATTGACTGATGTCGAGATTGCACTTCGCTTTTGGGATTTTTCCCTTTTTACTTTGAGAAAATTAGAGTGTTTCAAGCAGACTTTTGTCTTGAATACTTSWYCATGKAATAATAGAGWARGACTTTGGTTCTATTTTGTTGGTTTG
MagnaDeer46E	Netherlands	Capreolus capreolus		Babesia capreoli	ambiguous nucleotides	AAATAACAATRCAGGGCAATTGTCTTGTAATTGGAATGATGKTGACCTAMACCCTCACCAGAGTAACAATTGGMGGGCAAGTMTGKTGCCAGCAGCCGCGGTAATTCCAGCTCCAATAGCGTATATTAAACTTGTTGCAGTTAAAAAGCTCGTAGTTGAATTTTTGCGKGGTGTTAATATTGACTGATGTCGAGATTGCACTTCGCTTTTGGGATTTTTCCCTTTTTACTTTGAGAAAATTAGAGTGTTTCAAGCAGACTTTTGTCTTGAATACTTCAGCATGGAATAATAGAGTAGGACTTTGGTTCTATTTTGTTGGTTTGTGAACCTTAKTAATGGTTAATAKGAACGGTTGGGGGCATTCKTATT

## Sheet: COX
Key	Country	Vertebrate	Year	Babesia spp.	Sequence quality	DNA Sequence
Fox1516	Netherlands	Vulpes vulpes	2017	bad sequence	ambiguous nucleotides	ATCTATAATCTCGCCTTCACATTACATGGCATTATCATGATATTCTTCAACATAATGCCTGGCCTGTTCGGTGGCATAGGTAACTATTTGCTACCTATCATGGTGGGCGCTCCCGAGGTGACATTCCCGAGAGCTAACTTATATAGTCTGTTACTACAGCCTATAGCTTTCGCTCTGGTGGTTTCCTCACTTTATTGTGAAGTGAGTGGAGGTACAGGTTGGACACTTTATCCACCTTTAAGTACATCCATCACAACACTAAGTGTGGATTGTATAATCTCCGGGTTGATTATATCAGGTATTGCAAGCGTTATGAGCAGTGTTAACTTCGTATGCACTTTCAACAGCTTGAAATGTATAGGCATGCTGTTAGATAGACAGTTACCAACTTCGTGGTCA…
Fox1517	Netherlands	Vulpes vulpes	2017	vulpes cluster	no ambiguous nucleotides	ATCTATAATCTCGCCTTCACATTACATGGCATTATCATGATATTCTTCAACATAATGCCTGGCCTGTTCGGTGGCATAGGTAACTATTTGCTACCTATCATGGTGGGCGCTCCCGAGGTGACATTCCCGAGAGCTAACTTATATAGTCTGTTACTACAGCCTATAGCTTTCGCTCTGGTGGTTTCCTCACTTTATTGTGAAGTGAGTGGAGGTACAGGTTGGACACTTTATCCACCTTTAAGTACATCCATCACAACACTAAGTGTGGATTGTATAATCTCCGGGTTGATTATATCAGGTATTGCAAGCGTTATGAGCAGTGTTAACTTCGTATGCACTTTCAACAGCTTGAAATGTATAGGCATGCTGTTAGATAGACAGTTACCAACTTCGTGGTCA…
Fox1522	Netherlands	Vulpes vulpes	2017	vulpes cluster	ambiguous nucleotides	ATCTATAATCTCGCCTTCACATTACATGGCATTATCATGATATTCTTCAACATAATGCCTGGCCTGTTCGGTGGCATAGGTAACTATTTGCTACCTATCATGGTGGGCGCTCCCGAGGTGACATTCCCGAGAGCTAATTTATATAGTCTGTTATTACAGCCTATAGCTTTCGCTCTGGTGGTTTCCTCACTTTATTGTGAAGTGAGTGGAGGTACAGGTTGGACACTTTATCCACCTTTAAGTACATCCATCACAACACTAAGTGTGGATTGTATAATCTCCGGGTTGATTATATCAGGTATTGCAAGCGTTATGAGCAGTGTTAACTTCGTATGCACTTTCAACAGCTTGAAATGTATAGGCATGCTGTTAGATAGACAGTTACCAACTTCGTGGTCA…
D105BE	Belgium	Meles meles	2015	Badger type cluster	no ambiguous nucleotides	AGATAGGTTCATAGCTATCGATATAGTCGATATCTATAATCTTGCCTTCACATTACATGGCATTATAATGATATTCTTCAATATCATGCCAGGCCTGTTCGGTGGCATAGGTAACTACTTGCTACCTATCATGGTTGGCGCTCCCGAGGTTTCATTCCCGAGAGCGAATTTGTATAGTCTGCTCTTGCAGCCTCTAGCTTTTGCTCTGGTGATATCATCACTTTACTGTGAGGTAAGTGGAGGTACAGGATGGACTTTGTATCCACCTCTTAGTACATCCATAACCACGTTAAGTGTGGACATGATAATCTCCGGGTTGATTATATCAGGTATTGCAAGCGTTATGAGCAGTGTTAACTTCGTATGCACTTTCAACAGCTTGAAATGCGTAGGTATGCT…
D094BE	Belgium	Meles meles	2015	Badger type cluster	no ambiguous nucleotides	ATCTATAATCTTGCCTTCACATTACATGGCATTATAATGATATTCTTCAATATCATGCCAGGCCTGTTCGGTGGCATAGGTAACTACTTGCTACCTATCATGGTTGGCGCTCCCGAGGTTTCATTCCCGAGAGCGAATTTGTATAGTCTGCTTTTGCAGCCTCTAGCTTTTGCTCTGGTGATATCATCACTTTACTGTGAGGTAAGTGGAGGTACTGGTTGGACTTTATATCCACCTCTTAGTACATCCATAACCACGTTAAGTGTGGACATGATAATCTCCGGGTTGATTATATCAGGTATTGCAAGCGTTATGAGCAGTGTTAACTTCGTATGCACTTTCAACAGCTTGAAATGCGTAGGTATGCTGTTAGATAGACAACTACCAACGTCGTGGTCT…
D133BE	Belgium	Meles meles	2015	Badger type cluster	ambiguous nucleotides	TAGGTTCATAGCTATCGATATAGTCGATATCTATAATCTTGCCTTCACATTACATGGCATTATAATGATATTCTTCAATATCATGCCAGGCCTGTTCGGTGGCATAGGTAACTACTTGCTACCTATCATGGTTGGCGCTCCCGAGGTTTCATTCCCGAGAGCGAATTTGTATAGTCTGCTTTTGCAGCCTCTAGCTTTTGCTCTGGTGATATCATCACTTTACTGTGAGGTAAGTGGAGGTACTGGTTGGACTTTATATCCACCTCTTAGTACATCCATAACCACGTTAAGTGTGGACATGATAATCTCCGGGTTGATTATATCAGGTATTGCAAGCGTTATGAGCAGTGTTAACTTYGTATGCACTTTCAACAGCTTGAAATGCGTAGGTATGCTGTT…
D132BE	Belgium	Meles meles	2015	Badger type cluster	ambiguous nucleotides	AGATAGGTTCATAGCTATCGATATAGTCGATATCTATAATCTTGCCTTCACATTACATGGCATTATAATGATATTCTTCAATATCATGCCAGGCCTGTTCGGTGGCATAGGTAACTACTTGCTACCTATCATGGTTGGCGCTCCCGAGGTTTCATTCCCGAGAGCGAATTTGTATAGTCTGCTTTTGCAGCCTCTAGCTTTTGCTCTGGTGATATCATCACTTTACTGTGAGGTAAGTGGAGGTACTGGTTGGACTTTATATCCACCTCTTAGTACATCCATAACCACGTTAAGTGTGGACATGATAATCTCCGGGTTGATTATATCAGGTATTGCAAGCGTTATGAGCAGTGTTAACTTTGTATGCACTTTYAACAGCTTGAAATGCGTAGGTATGCT…
D103BE	Belgium	Meles meles	2015	Badger type cluster	ambiguous nucleotides	AGATAGGTTCATAGCTATCGATATAGTCGATATCTATAATCTTGCCTTCACATTACATGGCATTATAATGATATTCTTCAATATCATGCCAGGCCTGTTCGGTGGCATAGGTAACTACTTGCTACCTATCATGGTTGGCGCTCCCGAGGTTTCATTCCCGAGAGCGAATTTGTATAGTCTGCTTTTGCAGCCTCTAGCTTTTGCTCTGGTGATATCATCACTTTACTGTGAGGTAAGTGGAGGTACTGGTTGGACTTTATATCCACCTCTTAGTACATCCATAACCACGTTAAGTGTGGACATGATAATCTCCGGGTTGATTATATCAGGTATTGCAAGCGTTATGAGCAGTGTTAACTTTGTATGCACTTTTAACAGCTTGAAATGCGTAGGTATGCT…
D128BE	Belgium	Meles meles	2015	Badger type cluster	ambiguous nucleotides	AGTAGTGGAGATAGGTTCATAGCTATCGATATAGTCGATATCTATAATCTTGCCTTCACATTACATGGCATTATAATGATATTCTTCAATATCATGCCAGGCCTGTTCGGTGGCATAGGTAACTACTTGCTACCTATCATGGTTGGCGCTCCCGAGGTTTCATTCCCGAGAGCGAATTTGTATAGTCTGCTTTTGCAGCCTCTAGCTTTTGCTCTGGTGATATCATCACTTTACTGTGAGGTAAGTGGAGGTACTGGTTGGACTTTATATCCACCTCTTAGTACATCCATAACCACGTTAAGTGTGGACATGATAATCTCCGGGTTGATTATATCAGGTATTGCAAGCGTTATGAGCAGTGTTAACTTCGTATGCACTTTTAACAGCTTGAAATGCGTA…
D144BE	Belgium	Meles meles	2015	Badger type cluster	ambiguous nucleotides	AGTAGTGGAGATAGGTTCATAGCTATCGATATAGTCGATATCTATAATCTTGCCTTCACATTACATGGCATTATAATGATATTCTTCAATATCATGCCAGGCCTGTTCGGTGGCATAGGTAACTACTTGCTACCTATCATGGTTGGCGCTCCCGAGGTTTCATTCCCGAGAGCGAATTTGTATAGTCTGCTTTTGCAGCCTCTAGCTTTTGCTCTGGTGATATCATCACTTTACTGTGAGGTAAGTGGAGGTACTGGTTGGACWTTATATCCACCTCTTAGTACATCCATAACCACGTTAAGTGTGGACATGATAATCTCCGGGTTGATTATATCAGGTATTGCAAGCGTTATGAGCAGTGTTAACTTCGTATGCACTTTYAACAGCTTGAAATGCGTA…
D123BE	Belgium	Meles meles	2015	Badger type cluster	ambiguous nucleotides	AGATAGGTTCATAGCTATCGATATAGTCGATATCTATAATCTTGCCTTCACATTACATGGCATTATAATGATATTCTTCAATATCATGCCAGGCCTGTTCGGTGGCATAGGTAACTACTTGCTACCTATCATGGTTGGCGCTCCCGAGGTTTCATTCCCGAGAGCGAATTTGTATAGTCTGCTTTTGCAGCCTCTAGCTTTTGCTCTGGTGATATCATCACTTTACTGTGAGGTAAGTGGAGGTACTGGTTGGACTTTATATCCACCTCTTAGTACATCCATAACCACGTTAAGTGTGGACATGATAATCTCCGGGTTGATTATATCAGGTATTGCAAGCGTTATGAGCAGTGTTAACTTCGTATGCACTTTYAACAGCTTGAAATGCGTAGGTATGCT…
D100BE	Belgium	Meles meles	2015	Badger type cluster	no ambiguous nucleotides	AGATAGGTTCATAGCTATCGATATAGTCGATATCTATAATCTTGCCTTCACATTACATGGCATTATAATGATATTCTTCAATATCATGCCAGGCCTGTTCGGTGGCATAGGTAACTACTTGCTACCTATCATGGTTGGCGCTCCCGAGGTTTCATTCCCGAGAGCGAATTTGTATAGTCTGCTTTTGCAGCCTCTAGCTTTTGCTCTGGTGATATCATCACTTTACTGTGAGGTAAGTGGAGGTACTGGTTGGACTTTATATCCACCTCTTAGTACATCCATAACCACGTTAAGTGTGGACATGATAATCTCCGGGTTGATTATATCAGGTATTGCAAGCGTTATGAGCAGTGTTAACTTCGTATGCACTTTTAACAGCTTGAAATGCGTAGGTATGCT…
D110BE	Belgium	Meles meles	2015	Badger type cluster	ambiguous nucleotides	AGATAGGTTCATAGCTATCGATATAGTCGATATCTATAATCTTGCCTTCACATTACATGGCATTATAATGATATTCTTCAATATCATGCCAGGCCTGTTCGGTGGCATAGGTAACTACTTGCTACCTATCATGGTTGGCGCTCCCGAGGTTTCATTCCCGAGAGCGAATTTGTATAGTCTGCTCTTGCAGCCTCTAGCTTTTGCTCTGGTGATATCATCACTTTACTGTGAGGTAAGTGGAGGTACTGGTTGGACTTTATATCCACCTCTTAGTACATCCATAACCACGTTAAGTGTGGACATGATAATCTCCGGGTTGATTATATCAGGTATTGCAAGCGTTATGAGCAGTGTTAACTTCGTATGCACTTTCAACAGCTTGAAATGCGTAGGTATGCT…
D112BE	Belgium	Meles meles	2015	Badger type cluster	no ambiguous nucleotides	AGTAGTGGAGATAGGTTCATAGCTATCGATATAGTCGATATCTATAATCTTGCCTTCACATTACATGGCATTATAATGATATTCTTCAATATCATGCCAGGCCTGTTCGGTGGCATAGGTAACTACTTGCTACCTATCATGGTTGGCGCTCCCGAGGTTTCATTCCCGAGAGCGAATTTGTATAGTCTGCTTTTGCAGCCTCTAGCTTTTGCTCTGGTGATATCATCACTTTACTGTGAGGTAAGTGGAGGTACTGGTTGGACTTTATATCCACCTCTTAGTACATCCATAACCACGTTAAGTGTGGACATGATAATCTCCGGGTTGATTATATCAGGTATTGCAAGCGTTATGAGCAGTGTTAACTTTGTATGCACTTTTAACAGCTTGAAATGCGTA…
D118BE	Belgium	Meles meles	2015	Badger type cluster	ambiguous nucleotides	CATAGCTATCGATATAGTCGATATCTATAATCTTGCCTTCACATTACATGGCATTATAATGATATTCTTCAATATCATGCCAGGCCTGTTCGGTGGCATAGGTAACTACTTGCTACCTATCATGGTTGGCGCTCCCGAGGTTTCATTCCCGAGAGCGAATTTGTATAGTCTGCTYTTGCAGCCTCTAGCTTTTGCTCTGGTGATATCATCACTTTACTGTGAGGTAAGTGGAGGTACTGGWTGGACTTTRTATCCACCTCTTAGTACATCCATAACCACGTTAAGTGTGGAYATGATAATCTCCGGGTTGATTATATCAGGTATTGCAAGCGTTATGAGCAGTGTTAACTTTGTATGCACTTTYAACAGCTTGAAATGCGTAGGTATGCTGTTAGATAG…
RJm304	Netherlands	Myodes glareolus	2013	Babesia microti	no ambiguous nucleotides	TTTCACCTTACATGGCGTTATCATGATATTCTTCAACATCATGCCTGGCCTGTTTGGAGGTATAGGTAATTACCTATTGCCAATACTGGTCGGTGCTCCCGAGGTTGTCTTCCCAAGAGCTAACTTATATAGTTTGTTATTACAACCATTAGCTTTCGCTCTTGTAGTTTCTTCACTCTACTGTGAAGTAAGTGGAGGTACAGGATGGACATTATATCCTCCTTTAAGTACATCCATTACAACACTTAGTGTAGATCTGATAATCTCTGGATTGATTATATCAGGTATAGCAAGCGTTATGAGTAGTGTTAACTTTGTTTGCACGTTTAACAGCTTGAAGTGCGTAGGAATGCTGTTAGATAGACAGTTACCAACTTCTTGGTCTATCTATATAACATC…
RJm33	Netherlands	Myodes glareolus	2012	Babesia microti	ambiguous nucleotides	ATATTCTTCAACATCATGCCTGGCCTGTTTGGAGGTATAGGTAATTACCTATTGCCAATACTGGTCGGTGCTCCCGAGGTTGTCTTCCCAAGAGCTAACTTATATAGTTTGTTATTACAACCATTAGCTTTTGCTCTTGTGGTTTCTTCACTCTACTGTGAAGTAAGTGGAGGTACAGGATGGACATTATATCCTCCTTTAAGTACATCCATTACAACACTTAGTGTAGATCTGATAATCTCTGGATTGATTATATCAGGTATAGCAAGCGTTATGAGTAGTGTTAACTTTGTTTGCACGTTTAACAGCTTGAAGTGCGTAGGAATGCTGTTGGATAGACAGTTACCAACTTCTTGGTCTATCTATATAACATCTGTGTTATTGTTAGTAACATTACCA…
RJm855	Netherlands	Myodes glareolus	2014	Babesia microti	no ambiguous nucleotides	TTTCACCTTACATGGCGTTATCATGATATTTTTCAACATCATGCCTGGCCTGTTTGGAGGTATAGGTAATTACCTATTGCCAATAATGGTCGGTGCTCCCGAGGTTGTCTTCCCAAGAGCTAACTTATATAGTTTGTTGTTACAACCATTAGCTTTTGCTCTTGTGGTTTCTTCACTCTACTGTGAAGTAAGTGGAGGTACAGGATGGACATTATATCCTCCTTTAAGTACATCCATTACAACACTTAGTGTAGATCTGATAATCTCTGGATTGATTATATCAGGTATAGCAAGCGTTATGAGTAGTGTTAACTTTGTTTGCACGTTTAACAGCTTGAAGTGCGTAGGAATGCTGTTGGATAGACAGTTACCAACTTCTTGGTCTATCTATATAACATC…
RJm152	Netherlands	Myodes glareolus	2012	Babesia microti	ambiguous nucleotides	GCGTTATCATGATATTTTTCAACATCATGCCTGGCCTGTTTGGAGGTATAGGTAATTACCTATTGCCAATAATGGTCGGTGCTCCCGAGGTTGTCTTCCCAAGAGCTAACTTATATAGTTTGTTGTTACAACCATTAGCTTTTGCTCTTGTGGTTTCTTCACTCTACTGTGAAGTAAGTGGAGGTACAGGATGGACATTATATCCTCCTTTAAGTACATCCATTACAACACTTAGTGTAGATCTGATAATCTCTGGATTGATTATATCAGGTATAGCAAGCGTTATGAGTAGTGTTAACTTTGTTTGCACGTTTAACAGCTTGAAGTGCGTAGGAATGCTGTTGGATAGACAGTTACCAACTTCTTGGTCTATCTATATAACATCTGTGTTATTGTTAG…
RJm193	Netherlands	Myodes glareolus	2013	Babesia microti	no ambiguous nucleotides	GCGTTATCATGATATTTTTCAACATCATGCCTGGCCTGTTTGGAGGTATAGGTAATTACCTATTGCCAATAATGGTCGGTGCTCCCGAGGTTGTCTTCCCAAGAGCTAACTTATATAGTTTGTTGTTACAACCATTAGCTTTTGCTCTTGTGGTTTCTTCACTCTACTGTGAAGTAAGTGGAGGTACAGGATGGACATTATATCCTCCTTTAAGTACATCCATTACAACACTTAGTGTAGATCTGATAATCTCTGGATTGATTATATCAGGTATAGCAAGCGTTATGAGTAGTGTTAACTTTGTTTGCACGTTTAACAGCTTGAAGTGCGTAGGAATGCTGTTGGATAGACAGTTACCAACTTCTTGGTCTATCTATATAACATCTGTGTTATTGTTAG…
RJm853	Netherlands	Apodemus sylvaticus		Babesia microti	no ambiguous nucleotides	TACATGGCGTTATCATGATATTTTTCAACATCATGCCTGGCCTGTTTGGAGGTATAGGTAATTACCTATTGCCAATAATGGTCGGTGCTCCCGAGGTTGTCTTCCCAAGAGCTAACTTATATAGTTTGTTGTTACAACCATTAGCTTTTGCTCTTGTGGTTTCTTCACTCTACTGTGAAGTAAGTGGAGGTACAGGATGGACATTATATCCTCCTTTAAGTACATCCATTACAACACTTAGTGTAGATCTGATAATCTCTGGATTGATTATATCAGGTATAGCAAGCGTTATGAGTAGTGTTAACTTTGTTTGCACGTTTAACAGCTTGAAGTGCGTAGGAATGCTGTTGGATAGACAGTTACCAACTTCTTGGTCTATCTATATAACATCTGTGTTAT…
EH73KD	Netherlands	Cervus elaphus		Babesia odocoilei-EU		TTTGGAGGAATTGGAAACTATTTGTTCCCAATTTTGTTAGGTGCAAGTGATGTTGTATTTCCTAGAGCAAATCTATATAGTTTATTACTTCAACCTCTTGCTTTTGGTCTTGTAATTGCTTGTATGTGTGTTGAAATTGGAAGTGGAACCGGTTGGACTTTATATCCTCCTTTGTCAACTTCTATTTCTTCAATTGGTGTAGATTTTATAATTTTTGGTTTGTTTTTTTCAGGAATTGCAAGTGCTATGAGTGCTGCAAATTTTATAACTACTTTTTGTGTTTTAAAATCAATAGGACAAACAGTTGATAGATTGATTCCTACTGTTTGGTCAGTCGCTTTGACTGCTTTCTTGTTGCTTCTTTCTTTACCTGTTATTACAGCAGTATTATTAATGGTA…
EH24767	Netherlands	Cervus elaphus		Babesia odocoilei-EU		TTTGGAGGAATTGGAAACTATTTGTTCCCAATTTTGTTAGGTGCAAGTGATGTTGTATTTCCTAGAGCAAATCTATATAGTTTATTACTTCAACCTCTTGCTTTTGGTCTTGTAATTGCTTGTATGTGTGTTGAAATTGGAAGTGGAACCGGTTGGACTTTATATCCTCCTTTGTCAACTTCTATTTCTTCAATTGGTGTAGATTTTATAATTTTTGGTTTGTTTTTTTCAGGAATTGCAAGTGCTATGAGTGCTGCAAATTTTATAACTACTTTTTGTGTTTTAAAATCAATAGGACAAACAGTTGATAGATTGATTCCTACTGTTTGGTCAGTCGCTTTGACTGCTTTCTTGTTGCTTCTTTCTTTACCTGTTATTACAGCAGTATTATTAATGGTA…
EH23874	Netherlands	Cervus elaphus		Babesia odocoilei-EU		TTTGGAGGAATTGGAAACTATTGTTCCCAATTTTGTTAGGTGCAAGTGATGTTGTATTTCCTAGAGCAAATCTATATAGTTTATTACTTCAACCTCTTGCTTTTGGTCTTGTAATTGCTTGTATGTGTGTTGAAATTGGAAGTGGAACCGGTTGGACTTTATATCCTCCTTTGTCAACTTCTATTTCTTCAATTGGTGTAGATTTTATAATTTTTGGTTTGTTTTTTTCAGGAATTGCAAGTGCTATGAGTGCTGCAAATTTTATAACTACTTTTTGTGTTTTAAAATCAATAGGACAAACAGTTGATAGATTGATTCCTACTGTTTGGTCAGTCGCTTTGACTGCTTTCTTGTTGCTTCTTTCTTTACCTGTTATTACAGCAGTATTATTAATGGTAT…
EH4RK	Netherlands	Cervus elaphus		Babesia odocoilei-EU		TTTGGAGGAATTGGAAACTATTTGTTCCCAATTTTGTTAGGTGCAAGTGATGTTGTATTTCCTAGAGCAAATCTATATAGTTTATTACTTCAACCTCTTGCTTTTGGTCTTGTAATTGCTTGTATGTGTGTTGAAATTGGAAGTGGAACCGGTTGGACTTTATATCCTCCTTTGTCAACTTCTATTTCTTCAATTGGTGTAGATTTTATAATTTTTGGTTTGTTTTTTTCAGGAATTGCAAGTGCTATGAGTGCTGCAAATTTTATAACTACTTTTTGTGTTTTAAAATCAATAGGACAAACAGTTGATAGATTGATTCCTACTGTTTGGTCAGTCGCTTTGACTGCTTTCTTGTTGCTTCTTTCTTTACCTGTTATTACAGCAGTATTATTAATGGTA…
EH24304	Netherlands	Cervus elaphus		Babesia odocoilei-EU		TTTGGAGGAATTGGAAACTATTTGTTCCCAATTTGTTAGGTGCAAGTGATGTTGTATTTCCTAGAGCAAATCTATATAGTTTATTACTTCAACCTCTTGCTTTTGGTCTTGTAATTGCTTGTATGTGTGTTGAAATTGGAAGTGGAACCGGTTGGACTTTATATCCTCCTTTGTCAACTTCTATTTCTTCAATTGGTGTAGATTTTATAATTTTTGGTTTGTTTTTTTCAGGAATTGCAAGTGCTATGAGTGCTGCAAATTTTATAACTACTTTTTGTGTTTTAAAATCAATAGGACAAACAGTTGATAGATTGATTCCTACTGTTTGGTCAGTCGCTTTGACTGCTTTCTTGTTGCTTCTTTCTTTACCTGTTATTACAGCAGTATTATTAATGGTAT…
EH78KD	Netherlands	Cervus elaphus		Babesia odocoilei-EU		AACTATTTGTTCCCAATTTTGTTAGGTGCAAGTGATGTTGTATTTCCTAGAGCAAATCTATATAGTTTATTACTTCAACCTCTTGCTTTTGGTCTTGTAATTGCTTGTATGTGTGTTGAAATTGGAAGTGGAACCGGTTGGACTTTATATCCTCCTTTGTCAACTTCTATTTCTTCAATTGGTGTAGATTTTATAATTTTTGGTTTGTTTTTTTCAGGAATTGCAAGTGCTATGAGTGCTGCAAATTTTATAACTACTTTTTGTGTTTTAAAATCAATAGGACAAACAGTTGATAGATTGATTCCTACTGTTTGGTCAGTCGCTTTGACTGCTTTCTTGTTGCTTCTTTCTTTACCTGTTATTACAGCAGTATTATTAATGGTATTCTTTGACAGACAT…
EH77KD	Netherlands	Cervus elaphus		Babesia odocoilei-EU		GAAACTATTTGTTCCCAATTTTGTTAGGTGCAAGTGATGTTGTATTTCCTAGAGCAAATCTATATAGTTTATTACTTCAACCTCTTGCTTTTGGTCTTGTAATTGCTTGTATGTGTGTTGAAATTGGAAGTGGAACCGGTTGGACTTTATATCCTCCTTTGTCAACTTCTATTTCTTCAATTGGTGTAGATTTTATAATTTTTGGTTTGTTTTTTTCAGGAATTGCAAGTGCTATGAGTGCTGCAAATTTTATAACTACTTTTTGTGTTTTAAAATCAATAGGACAAACAGTTGATAGATTGATTCCTACTGTTTGGTCAGTCGCTTTGACTGCTTTCTTGTTGCTTCTTTCTTTACCTGTTATTACAGCAGTATTATTAATGGTATTCTTTGACAGAC…
EH24769	Netherlands	Cervus elaphus		Babesia odocoilei-EU		TTTGGAGGAATTGGAAACTATTTGTTCCCAATTTTGTTAGGTGCAAGTGATGTTGTATTTCCTAGAGCAAATCTATATAGTTTATTACTTCAACCTCTTGCTTTTGGTCTTGTAATTGCTTGTATGTGTGTTGAAATTGGAAGTGGAACCGGTTGGACTTTATATCCTCCTTTGTCAACTTCTATTTCTTCAATTGGTGTAGATTTTATAATTTTTGGTTTGTTTTTTTCAGGAATTGCAAGTGCTATGAGTGCTGCAAATTTTATAACTACTTTTTGTGTTTTAAAATCAATAGGACAAACAGTTGATAGATTGATTCCTACTGTTTGGTCAGTCGCTTTGACTGCTTTCTTGTTGCTTCTTTCTTTACCTGTTATTACAGCAGTATTATTAATGGTA…
EH83850	Netherlands	Cervus elaphus		Babesia odocoilei-EU		TCTTTAATGTTATGACTGGTCTATTTGGAGGAATTGGAAACTATTTGTTCCCAATTTTGTTAGGTGCAAGTGATGTTGTATTTCCTAGAGCAAATCTATATAGTTTATTACTTCAACCTCTTGCTTTTGGTCTTGTAATTGCTTGTATGTGTGTTGAAATTGGAAGTGGAACCGGTTGGACTTTATATCCTCCTTTGTCAACTTCTATTTCTTCAATTGGTGTAGATTTTATAATTTTTGGTTTGTTTTTTTCAGGAATTGCAAGTGCTATGAGTGCTGCAAATTTTATAACTACTTTTTGTGTTTTAAAATCAATAGGACAAACAGTTGATAGATTGATTCCTACTGTTTGGTCAGTCGCTTTGACTGCTTTCTTGTTGCTTCTTTCTTTACCTGTTA…
EH70KD	Netherlands	Cervus elaphus		Babesia odocoilei-EU		TAATGTTATGACTGGTCTATTTGGAGGAATTGGAAACTATTTGTTCCCAATTTTGTTAGGTGCAAGTGATGTTGTATTTCCTAGAGCAAATCTATATAGTTTATTACTTCAACCTCTTGCTTTTGGTCTTGTAATTGCTTGTATGTGTGTTGAAATTGGAAGTGGAACCGGTTGGACTTTATATCCTCCTTTGTCAACTTCTATTTCTTCAATTGGTGTAGATTTTATAATTTTTGGTTTGTTTTTTTCAGGAATTGCAAGTGCTATGAGTGCTGCAAATTTTATAACTACTTTTTGTGTTTTAAAATCAATAGGACAAACAGTTGATAGATTGATTCCTACTGTTTGGTCAGTCGCTTTGACTGCTTTCTTGTTGCTTCTTTCTTTACCTGTTATTAC…
EH24213	Netherlands	Cervus elaphus		Babesia odocoilei-EU		CTTTAATGTTATGACTGGTCTATTTGGAGGAATTGGAAACTATTTGTTCCCAATTTTGTTAGGTGCAAGTGATGTTGTATTTCCTAGAGCRAATCTATATAGTTTATTACTTCAACCTCTTGCTTTTGGTCTTGTAATTGCTTGTATGTGTGTTGAAATTGGAAGTGGAACCGGTTGGACTTTATATCCTCCTTTGTCAACTTCTATTTCTTCAATTGGTGTAGATTTTATAATTTTTGGTTTGTTTTTTTCAGGAATTGCAAGTGCTATGAGTGCTGCAAATTTTATAACTACTTTTTGTGTTTTAAAATCAATAGGACAAACAGTTGATAGATTGATTCCTACTGTTTGGTCAGTCGCTTTGACTGCTTTCTTGTTGCTTCTTTCTTTACCTGTTAT…
EH24707	Netherlands	Cervus elaphus		Babesia odocoilei-EU		ATTATGATATTCTTTAATGTTATGACTGGTCTATTTGGAGGAATTGGAAACTATTTGTTCCCAATTTTGTTAGGTGCAAGTGATGTTGTATTTCCTAGAGCAAATCTATATAGTTTATTACTTCAACCTCTTGCTTTTGGTCTTGTAATTGCTTGTATGTGTGTTGAAATTGGAAGTGGAACCGGTTGGACTTTATATCCTCCTTTGTCAACTTCTATTTCTTCAATTGGTGTAGATTTTATAATTTTTGGTTTGTTTTTTTCAGGAATTGCAAGTGCTATGAGTGCTGCAAATTTTATAACTACTTTTTGTGTTTTAAAATCAATAGGACAAACAGTTGATAGATTGATTCCTACTGTTTGGTCAGTCGCTTTGACTGCTTTCTTGTTGCTTCTTTCT…
EH24307	Netherlands	Cervus elaphus		Babesia odocoilei-EU		ATTATGATATTCTTTAATGTTATGACTGGTCTATTTGGAGGAATTGGAAACTATTTGTTCCCAATTTTGTTAGGTGCAAGTGATGTTGTATTTCCTAGAGCAAATCTATATAGTTTATTACTTCAACCTCTTGCTTTTGGTCTTGTAATTGCTTGTATGTGTGTTGAAATTGGAAGTGGAACCGGTTGGACTTTATATCCTCCTTTGTCAACTTCTATTTCTTCAATTGGTGTAGATTTTATAATTTTTGGTTTGTTTTTTTCAGGAATTGCAAGTGCTATGAGTGCTGCAAATTTTATAACTACTTTTTGTGTTTTAAAATCAATAGGACAAACAGTTGATAGATTGATTCCTACTGTTTGGTCAGTCGCTTTGACTGCTTTCTTGTTGCTTCTTTCT…
EH74KD	Netherlands	Cervus elaphus		Babesia odocoilei-EU		TTCCTAGAGCAAATCTATATAGTTTATTACTTCAACCTCTTGCTTTTGGTCTTGTAATTGCTTGTATGTGTGTTGAAATTGGAAGTGGAACCGGTTGGACTTTATATCCTCCTTTGTCAACTTCTATTTCTTCAATTGGTGTAGATTTTATAATTTTTGGTTTGTTTTTTTCAGGAATTGCAAGTGCTATGAGTGCTGCAAATTTTATAACTACTTTTTGTGTTTTAAAATCAATAGGACAAACAGTTGATAGATTGATTCCTACTGTTTGGTCAGTCGCTTTGACTGCTTTCTTGTTGCTTCTTTCTTTACCTGTTATTACAGCAGTATTATTAATGGTATTCTTTGACAGACATTATAACACTATGTTTTTTGAATCTGCAAATTCTGGTGATCCAG…
EH24305	Netherlands	Cervus elaphus		Babesia odocoilei-EU		TGATGTTGTATTTCCTAGAGCAAATCTATATAGTTTATTACTTCAACCTCTTGCTTTTGGTCTTGTAATTGCTTGTATGTGTGTTGAAATTGGAAGTGGAACCGGTTGGACTTTATATCCTCCTTTGTCAACTTCTATTTCTTCAATTGGTGTAGATTTTATAATTTTTGGTTTGTTTTTTTCAGGAATTGCAAGTGCTATGAGTGCTGCAAATTTTATAACTACTTTTTGTGTTTTAAAATCAATAGGACAAACAGTTGATAGATTGATTCCTACTGTTTGGTCAGTCGCTTTGACTGCTTTCTTGTTGCTTCTTTCTTTACCTGTTATTACAGCAGTATTATTAATGGTATTCTTTGACAGACATTATAACACTATGTTTTTTGAATCTGCAAATTC…
EH23836	Netherlands	Cervus elaphus		Babesia odocoilei-EU		AGGTGCAAGTGATGTTGTATTTCCTAGAGCAAATCTATATAGTTTATTACTTCAACCTCTTGCTTTTGGTCTTGTAATTGCTTGTATGTGTGTTGAAATTGGAAGTGGAACCGGTTGGACTTTATATCCTCCTTTGTCAACTTCTATTTCTTCAATTGGTGTAGATTTTATAATTTTTGGTTTGTTTTTTTCAGGAATTGCAAGTGCTATGAGTGCTGCAAATTTTATAACTACTTTTTGTGTTTTAAAATCAATAGGACAAACAGTTGATAGATTGATTCCTACTGTTTGGTCAGTCGCTTTGACTGCTTTCTTGTTGCTTCTTTCTTTACCTGTTATTACAGCAGTATTATTAATGGTATTCTTTGACAGACATTATAACACTATGTTTTTTGAATC…
EH79KD	Netherlands	Cervus elaphus		Babesia odocoilei-EU		TGATGTTGTATTTCCTAGAGCAAATCTATATAGTTTATTACTTCAACCTCTTGCTTTTGGTCTTGTAATTGCTTGTATGTGTGTTGAAATTGGAAGTGGAACCGGTTGGACTTTATATCCTCCTTTGTCAACTTCTATTTCTTCAATTGGTGTAGATTTTATAATTTTTGGTTTGTTTTTTTCAGGAATTGCAAGTGCTATGAGTGCTGCAAATTTTATAACTACTTTTTGTGTTTTAAAATCAATAGGACAAACAGTTGATAGATTGATTCCTACTGTTTGGTCAGTCGCTTTGACTGCTTTCTTGTTGCTTCTTTCTTTACCTGTTATTACAGCAGTATTATTAATGGTATTCTTTGACAGACATTATAACACTATGTTTTTTGAATCTGCAAATTC…
EH23218	Netherlands	Cervus elaphus		Babesia odocoilei-EU		TGATGTTGTATTTCCTAGAGCAAATCTATATAGTTTGTTACTTCAACCTCTTGCTTTTGGTCTTGTAATTGCTTGTATGTGTGTTGAAATTGGAAGTGGAACCGGTTGGACTTTATATCCTCCTTTGTCAACTTCTATTTCTTCAATTGGTGTAGATTTTATAATTTTTGGTTTGTTTTTTTCAGGAATTGCAAGTGCTATGAGTGCTGCAAATTTTATAACTACTTTTTGTGTTTTAAAATCAATAGGACAAACAGTTGATAGATTGATTCCTACTGTTTGGTCAGTCGCTTTGACTGCTTTCTTGTTGCTTCTTTCTTTACCTGTTATTACAGCAGTATTATTAATGGTATTCTTTGACAGACATTATAACACTATGTTTTTTGAATCTGCAAATTC…
EH81KD	Netherlands	Cervus elaphus		Babesia odocoilei-EU		ACTATTTGTTCCCAATTTTGTTAGGTGCAAGTGATGTTGTATTTCCTAGAGCAAATCTATATAGTTTATTACTTCAACCTCTTGCTTTTGGTCTTGTAATTGCTTGTATGTGTGTTGAAATTGGAAGTGGAACCGGTTGGACTTTATATCCTCCTTTGTCAACTTCTATTTCTTCAATTGGTGTAGATTTTATAATTTTTGGTTTGTTTTTTTCAGGAATTGCAAGTGCTATGAGTGCTGCAAATTTTATAACTACTTTTTGTGTTTTAAAATCAATAGGACAAACAGTTGATAGATTGATTCCTACTGTTTGGTCAGTCGCTTTGACTGCTTTCTTGTTGCTTCTTTCTTTACCTGTTATTACAGCAGTATTATTAATGGTATTCTTTGACAGACATT…
EH10RK	Netherlands	Cervus elaphus		Babesia odocoilei-EU		TTAGGTGCAAGTGATGTTGTATTTCCTAGAGCAAATCTATATAGTTTATTACTTCAACCTCTTGCTTTTGGTCTTGTAATTGCTTGTATGTGTGTTGAAATTGGAAGTGGAACCGGTTGGACTTTATATCCTCCTTTGTCAACTTCTATTTCTTCAATTGGTGTAGATTTTATAATTTTTGGTTTGTTTTTTTCAGGAATTGCAAGTGCTATGAGTGCTGCAAATTTTATAACTACTTTTTGTGTTTTAAAATCAATAGGACAAACAGTTGATAGATTGATTCCTACTGTTTGGTCAGTCGCTTTGACTGCTTTCTTGTTGCTTCTTTCTTTACCTGTTATTACAGCAGTATTATTAATGGTATTCTTTGACAGACATTATAACACTATGTTTTTTGAA…
EH8RK	Netherlands	Cervus elaphus		Babesia odocoilei-EU		AATTTTGTTAGGTGCAAGTGATGTTGTATTTCCTAGAGCAAATCTATATAGTTTATTACTTCAACCTCTTGCTTTTGGTCTTGTAATTGCTTGTATGTGTGTTGAAATTGGAAGTGGAACCGGTTGGACTTTATATCCTCCTTTGTCAACTTCTATTTCTTCAATTGGTGTAGATTTTATAATTTTTGGTTTGTTTTTTTCAGGAATTGCAAGTGCTATGAGTGCTGCAAATTTTATAACTACTTTTTGTGTTTTAAAATCAATAGGACAAACAGTTGATAGATTGATTCCTACTGTTTGGTCAGTCGCTTTGACTGCTTTCTTGTTGCTTCTTTCTTTACCTGTTATTACAGCAGTATTATTAATGGTATTCTTTGACAGACATTATAACACTATGTT…
EH82KD	Netherlands	Cervus elaphus		Babesia odocoilei-EU		GTTCCCAATTTTGTTAGGTGCAAGTGATGTTGTATTTCCTAGAGCAAATCTATATAGTTTATTACTTCAACCTCTTGCTTTTGGTCTTGTAATTGCTTGTATGTGTGTTGAAATTGGAAGTGGAACCGGTTGGACTTTATATCCTCCTTTGTCAACTTCTATTTCTTCAATTGGTGTAGATTTTATAATTTTTGGTTTGTTTTTTTCAGGAATTGCAAGTGCTATGAGTGCTGCAAATTTTATAACTACTTTTTGTGTTTTAAAATCAATAGGACAAACAGTTGATAGATTGATTCCTACTGTTTGGTCAGTCGCTTTGACTGCTTTCTTGTTGCTTCTTTCTTTACCTGTTATTACAGCAGTATTATTAATGGTATTCTTTGACAGACATTATAACAC…
EH-1-RK	Netherlands	Cervus elaphus		Babesia odocoilei-EU		CCAATTTTGTTAGGTGCAAGTGATGTTGTATTTCCTAGAGCAAATCTATATAGTTTATTACTTCAACCTCTTGCTTTTGGTCTTGTAATTGCTTGTATGTGTGTTGAAATTGGAAGTGGAACCGGTTGGACTTTATATCCTCCTTTGTCAACTTCTATTTCTTCAATTGGTGTAGATTTTATAATTTTTGGTTTGTTTTTTTCAGGAATTGCAAGTGCTATGAGTGCTGCAAATTTTATAACTACTTTTTGTGTTTTAAAATCAATAGGACAAACAGTTGATAGATTGATTCCTACTGTTTGGTCAGTCGCTTTGACTGCTTTCTTGTTGCTTCTTTCTTTACCTGTTATTACAGCAGTATTATTAATGGTATTCTTTGACAGACATTATAACACTATG…
RJ1610	Netherlands	Ixodes ricinus	2013	Babesia odocoilei-EU	no ambiguous nucleotides	TCTTTAATGTTATGACTGGTCTATTTGGAGGAATTGGAAACTATTTGTTCCCAATTTTGTTAGGTGCAAGTGATGTTGTATTTCCTAGAGCAAATCTATATAGTTTATTACTTCAACCTCTTGCTTTTGGTCTTGTAATTGCTTGTATGTGTGTTGAAATTGGAAGTGGAACCGGTTGGACTTTATATCCTCCTTTGTCAACTTCTATTTCTTCAATTGGTGTAGATTTTATAATTTTTGGTTTGTTTTTTTCAGGAATTGCAAGTGCTATGAGTGCTGCAAATTTTATAACTACTTTTTGTGTTTTAAAATCAATAGGACAAACAGTTGATAGATTGATTCCTACTGTTTGGTCAGTCGCTTTGACTGCTTTCTTGTTGCTTCTTTCTTTACCTGTTA…
EH2671	Netherlands	Cervus elaphus		Babesia odocoilei-EU		ATTTGTTCCCAATTTTGTTAGGTGCAAGTGATGTTGTATTTCCTAGAGCAAATCTATATAGTTTATTACTTCAACCTCTTGCTTTTGGTCTTGTAATTGCTTGTATGTGTGTTGAAATTGGAAGTGGAACCGGTTGGACTTTATATCCTCCTTTGTCAACTTCTATTTCTTCAATTGGTGTAGATTTTATAATTTTTGGTTTGTTTTTTTCAGGAATTGCAAGTGCTATGAGTGCTGCAAATTTTATAACTACTTTTTGTGTTTTAAAATCAATAGGACAAACAGTTGATAGATTGATTCCTACTGTTTGGTCAGTCGCTTTGACTGCTTTCTTGTTGCTTCTTTCTTTACCTGTTATTACAGCAGTATTATTAATGGTATTCTTTGACAGACATTATA…
EH23884	Netherlands	Cervus elaphus		Babesia odocoilei-EU		ATTATGATATTCTTTAATGTTATGACTGGTCTATTTGGAGGAATTGGAAACTATTTGTTCCCAATTTTGTTAGGTGCAAGTGATGTTGTATTTCCTAGAGCAAATTTATATAGTTTATTACTTCAACCTCTTGCTTTTGGTCTTGTAATTGCTTGTATGTGTGTTGAAATTGGAAGTGGAACCGGTTGGACTTTATATCCTCCTTTGTCAACTTCTATTTCTTCAATTGGTGTAGATTTTATAATTTTTGGTTTGTTTTTTTCAGGAATTGCAAGTGCTATGAGTGCTGCAAATTTTATAACTACTTTTTGTGTTTTAAAATCAATAGGACAAACAGTTGATAGATTGATTCCTACTGTTTGGTCAGTCGCTTTGACTGCTTTCTTGTTGCTTCTTTCT…
E39	Netherlands	Cervus elaphus	2019	Babesia odocoilei-EU		ATTAATTATGATATTCTTTAATGTTATGACTGGTCTATTTGGAGGAATTGGAAACTATTTGTTCCCAATTTTGTTAGGTGCAAGTGATGTTGTATTTCCTAGAGCAAATCTATATAGTTTATTACTTCAACCTCTTGCTTTTGGTCTTGTAATTGCTTGTATGTGTGTTGAAATTGGAAGTGGAACCGGTTGGACTTTATATCCTCCTTTGTCAACTTCTATTTCTTCAATTGGTGTAGATTTTATAATTTTTGGCTTGTTTTTTTCAGGAATTGCAAGTGCTATGAGTGCTGCAAATTTTATAACTACTTTTTGTGTTTTAAAATCAATAGGACAGACAGTTGATAGATTGATTCCTACTGTTTGGTCAGTCGCTTTGACTGCTTTCTTGTTGCTTCT…
EH24715	Netherlands	Cervus elaphus		Babesia odocoilei-EU		TTTCCTAGAGCAAATCTATATAGTTTATTACTTCAACCTCTTGCTTTTGGTCTTGTAATTGCTTGTATGTGTGTTGAAATTGGAAGTGGAACCGGTTGGACTTTATATCCTCCTTTGTCAACTTCTATTTCTTCAATTGGTGTAGATTTTATAATTTTTGGTTTGTTTTTTTCAGGAATTGCAAGTGCTATGAGTGCTGCAAATTTTATAACTACTTTTTGTGTTTTAAAATCAATAGGACAAACAGTTGATAGATTGATTCCTACTGTTTGGTCAGTCGCTTTGACTGCTTTCTTGTTGCTTCTTTCTTTACCTGTTATTACAGCAGTATTATTAATGGTATTCTTTGACAGACATTATAACACTATGTTTTTTGAATCTGCAAATTCTGGTGATCCA…
EH24300	Netherlands	Cervus elaphus		Babesia odocoilei-EU		CTCTTGCTTTTGGTCTTGTAATTGCTTGTATGTGTGTTGAAATTGGAAGTGGAACCGGTTGGACTTTATATCCTCCTTTGTCAACTTCTATTTCTTCAATTGGTGTAGATTTTATAATTTTTGGTTTGTTTTTTTCAGGAATTGCAAGTGCTATGAGTGCTGCAAATTTTATAACTACTTTTTGTGTTTTAAAATCAATAGGACAAACAGTTGATAGATTGATTCCTACTGTTTGGTCAGTCGCTTTGACTGCTTTCTTGTTGCTTCTTTCTTTACCTGTTATTACAGCAGTATTATTAATGGTATTCTTTGACAGACATTATAACACTATGTTTTTTGAATCTGCAAATTCTGGTGATCCAGTTTTATACCAGCATTTATTCTGGTTTTTTGGACATC…
EH24725	Netherlands	Cervus elaphus		Babesia odocoilei-EU		ACTTCAACCTCTTGCTTTTGGTCTTGTAATTGCTTGTATGTGTGTTGAAATTGGAAGTGGAACCGGTTGGACTTTATATCCTCCTTTGTCAACTTCTATTTCTTCAATTGGTGTAGATTTTATAATTTTTGGTTTGTTTTTTTCAGGAATTGCAAGTGCTATGAGTGCTGCAAATTTTATAACTACTTTTTGTGTTTTAAAATCAATAGGACAAACAGTTGATAGATTGATTCCTACTGTTTGGTCAGTCGCTTTGACTGCTTTCTTGTTGCTTCTTTCTTTACCTGTTATTACAGCAGTATTATTAATGGTATTCTTTGACAGACATTATAACACTATGTTTTTTGAATCTGCAAATTCTGGTGATCCAGTTTTATACCAGCATTTATTCTGGTTTTT…
EH24214	Netherlands	Cervus elaphus		Babesia odocoilei-EU		GAAATTGGAAGTGGAACCGGTTGGACTTTATATCCTCCTTTGTCAACTTCTATTTCTTCAATTGGTGTAGATTTTATAATTTTTGGTTTGTTTTTTTCAGGAATTGCAAGTGCTATGAGTGCTGCAAATTTTATAACTACTTTTTGTGTTTTAAAATCAATAGGACAAACAGTTGATAGATTGATTCCTACTGTTTGGTCAGTCGCTTTGACTGCTTTCTTGTTGCTTCTTTCTTTACCTGTTATTACAGCAGTATTATTAATGGTATTCTTTGACAGACATTATAACACTATGTTTTTTGAATCTGCAAATTCTGGTGATCCAGTTTTATACCAGCATTTATTCTGGTTTTTTGGACATCCAGAAGTATACATATTAATATTGCCTGCTTTTGGAATT…
EH75KD	Netherlands	Cervus elaphus		Babesia odocoilei-EU		TATAATTTTTGGTTTGTTTTTTTCAGGAATTGCAAGTGCTATGAGTGSTGCAAATTTTATAACTACTTTTTGTGTTTTAAAATCAATAGGACAAACAGTTGATAGATTGATTCSTACWGTTTGGTCAGTCGCTTTGACKGCTTTCTTGTTGCTTCTTTCTTTACCTGTTATTACAGCAGTATTAWTAATGGTATTCTTTGACAGACATTATAACACTATGTTTTTTGAATYTGCAAATTYTGGTGATCCAGTTTTATACCAGCATTTATTSTGGTTTTTTGGACATCCAGAAGTATACATATTAATATTGCMTRSTTTTGGAATTATAAGTTTAATTTTATCTTGTTATGGTTCAAGAGAAGTATWTGGAAATCAAACAATGATATTAGCGATGGCATC…
EH69452	Netherlands	Cervus elaphus		Babesia odocoilei-EU		TGTTTTTTTTCAGGAATTGCAAGTGCTATGAGTGCTGCAAATTTTATAACTACTTTTTGTGTTTTAAAATCAATAGGACAAACAGTTGATAGATTGATTCYTACTGTTTGGTCAGTCGCTTTGACTGCTTTCTTGTTGMTTCTTTCTTTACCTGTTATTACAGCAGTATTATTAATGGTATTCTTTGACAGACATTATAACACTATGTTTTTTGAATCTGCAAATTCTGGTGATCCAGTTTTATACCAGCATTTATTCTGGTTTTTTGGACATCCAGAAGTATACATATTAATATTGCCTGCTTTTGGAATTATAAGTTTAATTTTATCTTGTTATGGTTCAAGAGAAGTATTTGGAAATCAAACAATGATATTAGCGATGGCATCAATTGCTTTGTTG…
EH24710	Netherlands	Cervus elaphus		Babesia odocoilei-EU		TTCTTCAATTGGTGTAGATTTTATAATTTTTGGTTTGTTTTTTTCAGGAATTGCAAGTGCTATGAGTGCTGCAAATTTTATAACTACTTTTTGTGTTTTAAAATCAATAGGACAAACAGTTGATAGATTGATTCCTACTGTTTGGTCAGTCGCTTTGACTGCTTTCTTGTTGCTTCTTTCTTTACCTGTTATTACAGCAGTATTATTAATGGTATTCTTTGACAGACATTATAACACTATGTTTTTTGAATCTGCAAATTCTGGTGATCCAGTTTTATACCAGCATTTATTCTGGTTTTTTGGACATCCAGAAGTATACATATTAATATTGCCTGCTTTTGGAATTATAAGTTTAATTTTATCTTGTTATGGTTCAAGAGAAGTATTTGGAAATCAAAC…
EH24790	Netherlands	Cervus elaphus		Babesia odocoilei-EU		TATTTCTTCAATTGGTGTAGATTTTATAATTTTTGGTTTGTTTTTTTCAGGAATTGCAAGTGCTATGAGTGCTGCAAATTTTATAACTACTTTTTGTGTTTTAAAATCAATAGGACAAACAGTTGATAGATTGATTCCTACTGTTTGGTCAGTCGCTTTGACTGCTTTCTTGTTGCTTCTTTCTTTACCTGTTATTACAGCAGTATTATTAATGGTATTCTTTGACAGACATTATAACACTATGTTTTTTGAATCTGCAAATTCTGGTGATCCAGTTTTATACCAGCATTTATTCTGGTTTTTTGGACATCCAGAAGTATACATATTAATATTGCCTGCTTTTGGAATTATAAGTTTAATTTTATCTTGTTATGGTTCAAGAGAAGTATTTGGAAATCA…
EH5RK	Netherlands	Cervus elaphus		Babesia odocoilei-EU		TTGTCAACTTYTATTTCTTCAAATGGTGTAGATTTTATAATTTTTGGTTTGTTTTTTTCAGGAATTGCAAGTGCTAWGAGTGCTGCAAATTTTATAACTACTTTTTGTGTTTTAAAATCAATAGGACAAACAGTTGATAGATTGATTCCTACTGTTTGGTCAGTCGCTTTGACTGCTTTCTTGTTGCTTCTTTCTTTACCTGTTATTACAGCAGTATTATTAATGGTATTCTTTGACAGACATTATAACACTATGTTTTTTGAATCTGCAAATTCTGGTGATCCAGTTTTATACCAGCATTTATTYTGGTTTTTTGGACATCCAGAAGTATACATATTAATATTGCCTGCTTTTGGAATTATAAGTTTAATTTTATCTTGTTATGGTTCAAGAGAAGTA…
EH24762	Netherlands	Cervus elaphus		Babesia odocoilei-EU		TTGGACTTTATATCCTCCTTTGTCAACTTCTATTTCTTCAATTGGTGTAGATTTTATAATTTTTGGTTTGTTTTTTTCAGGAATTGCAAGTGCTATGAGTGCTGCAAATTTTATAACTACTTTTTGTGTTTTAAAATCAATAGGACAAACAGTTGATAGATTGATTCCTACTGTTTGGTCAGTCGCTTTGACTGCTTTCTTGTTGCTTCTTTCTTTACCTGTTATTACAGCAGTATTATTAATGGTATTCTTTGACAGACATTATAACACTATGTTTTTTGAATCTGCAAATTCTGGTGATCCAGTTTTATACCAGCATTTATTCTGGTTTTTTGGACATCCAGAAGTATACATATTAATAGTGCCTGCTTTTGGAATTATAAGTTTAATTTTATCTTG…
MagnaDeer67F	Netherlands	Capreolus capreolus		Babesia venatorum	ambiguous nucleotides	TGTAGGAAATTATTTGTTYCCTATTTTATTAGGAGCTAGTGATGTTGTATTTCCAAGGGCAAATCTTTATAGTTTGTTACTTCAACCTATTGCTTTTGGTYTAGTKATTGCTTGTATGTGTGTTGAAATTGGAAGTGGTACTGGTTGGACTTTATATCCTCCTTTGTCAACTTCTATTTCTTCTATAGGTGTTGATTTTATTATTTTTGGTTTATTATTTTCAGGTATAGCMAGTGCTATGAGTGCTGCAAATTTTATAACTACTTTTTGTACTTTAAAATCAATTGGTCAACCTGTTGATAGATTAATTCCTACAGTATGGTCAATTGTTTTGACAGCCTTTTTATTACTTCTATCTTTACCTGTTATWACTKCAGTGCTATTGATGGTATTTTTAGA…
MagnaDeer35F	Netherlands	Capreolus capreolus		Cap/ven coinf?	ambiguous nucleotides	GGTGTAGGAAATTATTTGTTTCCTATATTACTWGGAGCTAGTGATGTTRTATTTCCAAGGGCAAATCTKTATAGTTTRTTRCTTCARCCTATTGCTTTTGGTYTAGTKRTTGCTTGTATGTGTGTTGAAWTAGGAAGTGGAACWGGATGGACKYTATATCCTCCTTTGTCWACTTCTATTTCTTCWATAGGTGTTGATTTTATTATTTTTGGKTTATTWTTTTCWGGAATAGCMAGTGCTATGAGTGCTGCWAAYTTTATMACTACTTTTTGTRYTTTAAAATCARTTGGTCARMCWGTTGATAGRWTAATTCCTACAGTRTGGTCAATTGTTTTRACAGCYTTTTTRTTACTTTTRTCWTTACCWGTTATWACTKCWGTKYTATTGATGGTATTTTTA…
MagnaDeer42G	Netherlands	Capreolus capreolus		Cap/ven coinf?	ambiguous nucleotides	TCAACCTATTGCTTTTGGTYTWGTKRTTGCTTGTATGTGTGTTGAAWTWGGAAGTGGAACWGGATGGACKYTATATCCTCCTTTRTCWACTTCTATTTCTTCTATAGGTGKTGATTTTATWATTTTTGGKTTRTTWTTTTCWGGAATAGCCAGTGCTATGAGTGCTGCWAATTTTATMACTACTTTTTGTRYTTTAAAATCWRTTGGTCAAMCTGTTGATAGRWTAATTCCTACAGTRTGGTCAATTGTTTTRACAGCYTTTTTRTTACTTYTRTCWTTACCWGTTATWACTKCWGTGYTATTGATGGTATTTTTAGAYAGACATTATAATACTATGTTCTTTGAAKCTGCAAATTCTGGAGATCCTGTTTTATAYCAGCATTTATTYTGGTTTTTTGG…
MagnaDeer7H	Netherlands	Capreolus capreolus		Cap/ven coinf?	ambiguous nucleotides	TTTYAATGTCATGACYGGTYTGTTTGGTGGTGTAGGAAATTATTTGTTTCCTATATTAYTAGGAGCTAGTGATGTTRTATTTCCAAGGGCAAATCTKTATAGTTTGTTRCTTCARCCTATTGCTTTTGGTYTAGTKRTTGCTTGTATGTGTGTTGAAATWGGAAGTGGWACWGGWTGGACKYTATATCCTCCTTTRTCWACTTCTATTTCTTCWATAGGTGTTGATTTTATTATTTTTGGKTTRTTATTTTCWGGWATAGCMAGTGCTATGAGTGCTGCWAATTTTATMACTACTTTTTGTRCTTTAAAATCWRTTGGTCAAMCTGTTGATAGAWTAATTCCTACAGTRTGGTCAATTGTTTTRACAGCYTTTTTRTTACTTYTRTCTTTACCTGTTAT…
MagnaDeer28D	Netherlands	Capreolus capreolus		Cap/ven coinf?	ambiguous nucleotides	TTTYAATGTCATGACYGGTCTGTTTGGKGGTGTAGGAAATTATTTGTTTCCTATATTATTAGGAGCTAGTGATGTTRTATTTCCAAGGGCAAATCTKTATAGTTTRTTRCTTCAACCTATTGCTTTTGGTYTAGTKATTGCTTGTATGTGTGTTGAAATWGGAAGTGGWACTGGWTGGACTYTATATCCTCCTTTGTCAACTTCTATTTCTTCTATAGGTGTTGATTTTATTATTTTTGGKTTATTATTTTCAGGWATAGCMAGTGCTATGAGTGCTGCWAATTTTATMACTACTTTTTGTRCTTTAAAATCARTTGGTCAACCTGTTGATAGRWTAATTCCTACAGTRTGGTCAATTGTTTTRACAGCYTTTTTRTTACTTYTRTCTTTACCTGTTAT…
MagnaDeer66G	Netherlands	Capreolus capreolus		Babesia venatorum	ambiguous nucleotides	TGTAGGAAATTATTTGTTTTCCTATTTATTAGGAGCTAGTGATGTTGTATTTCCAAGGGCAAATCTKTATAGTTTRTTACTTCAACCTATTGCTTTTGGTYTAGTTATTGCTTGTATGTGTGTTGAAATTGGAAGTGGTACWGGWTGGACKYTATATCCTCCTTTGTCAACTTCTATTTCTTCTATAGGTGTTGATTTTATTATTTTTGGKTTATTATTTTCAGGWATAGCMAGTGCTATGAGTGCTGCWAATTTTATMACTACTTTTTGTRCTTTAAAATCARTTGGTCAACCTGTTGATAGRWTAATTCCTACAGTRTGGTCAATTGTTTTRACAGCCTTTTTRTTACTTCTRTCTTTACCTGTTATWACTTCAGTGYTATTGATGGTATTTTTAGA…
[truncated: 174 more rows]

## Sheet: Species-specific PCR
Key	Species	Species specific PCR	DNA sequence
[truncated: 70 more rows]
